# Supplementary material for: Biodiversity of Mineral Nutrient and Trace Element Accumulation in Arabidopsis thaliana
Source: PubMed Central journal article supplement (PMC3338729; doi:10.1371/journal.pone.0035121), 2012-04-27

Hydro Root Li

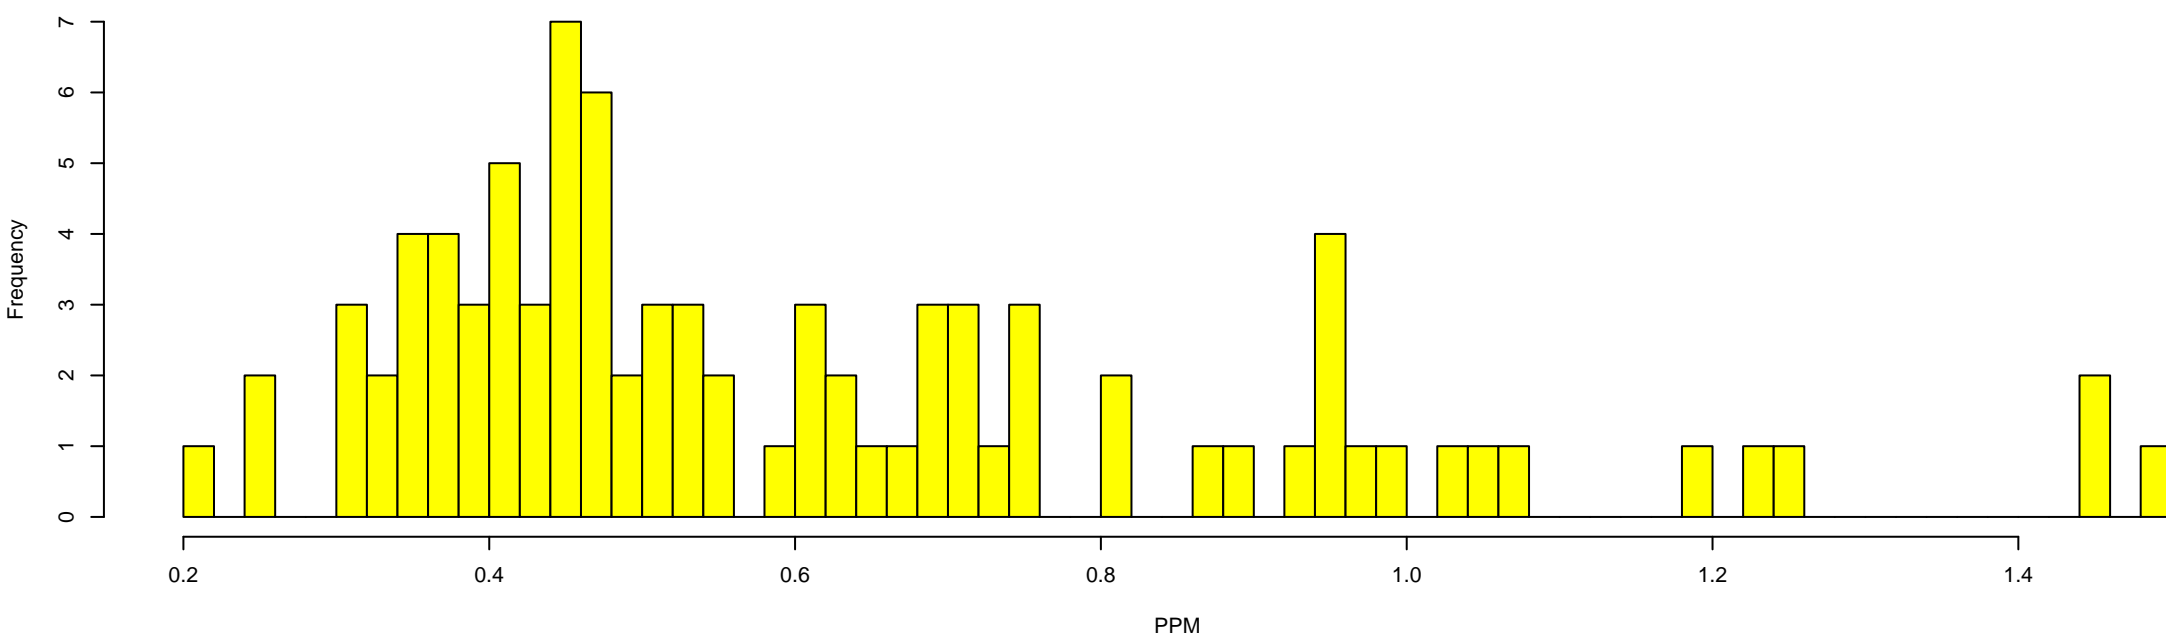

Hydro Shoot Li

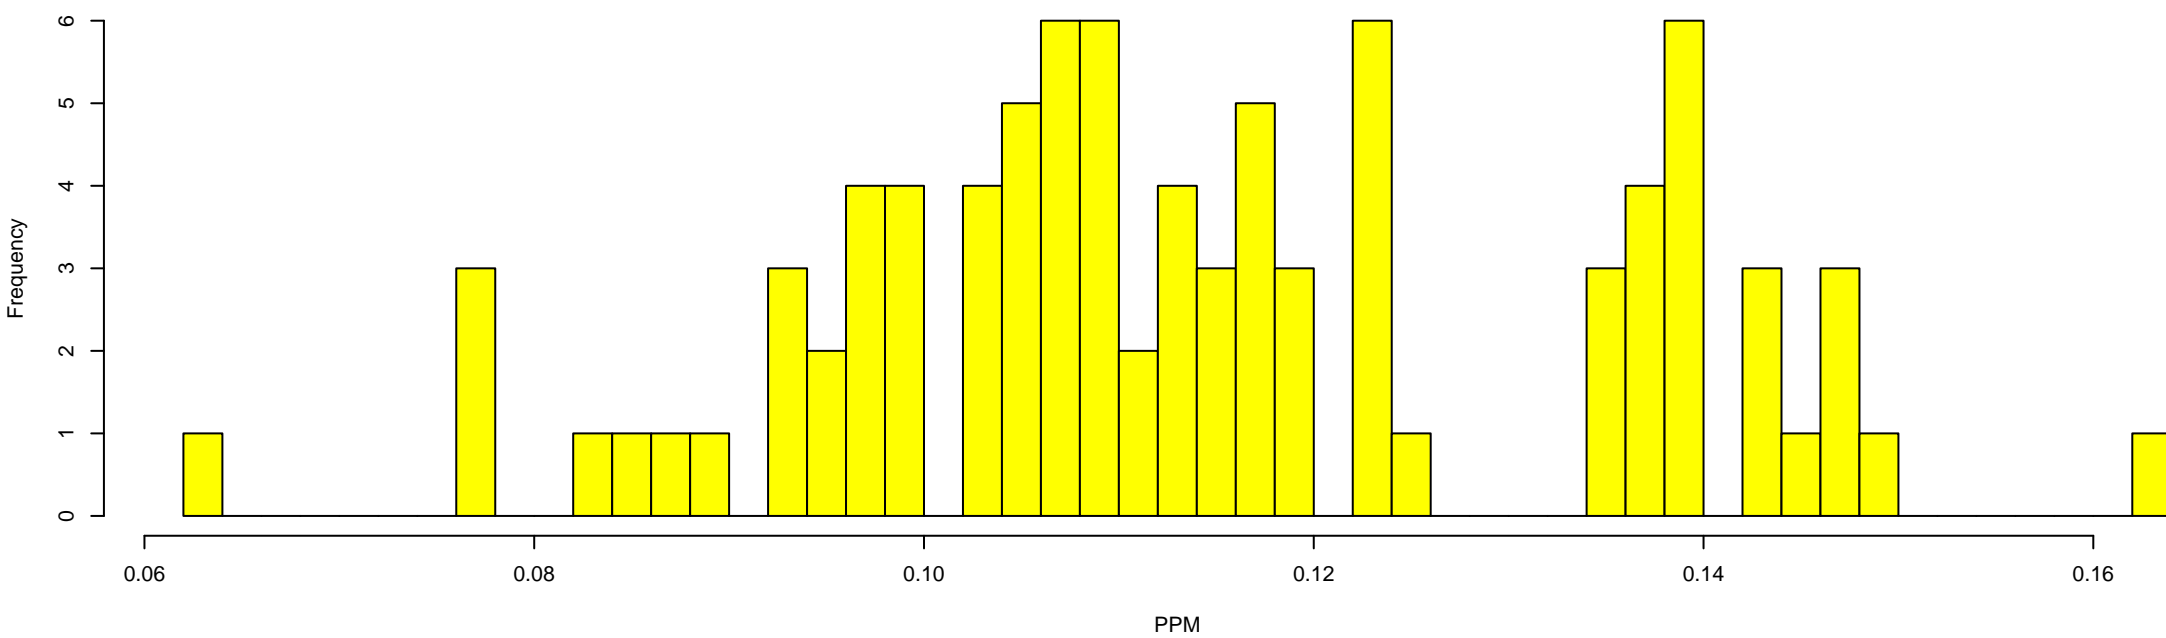

2nd Soil Shoot Li

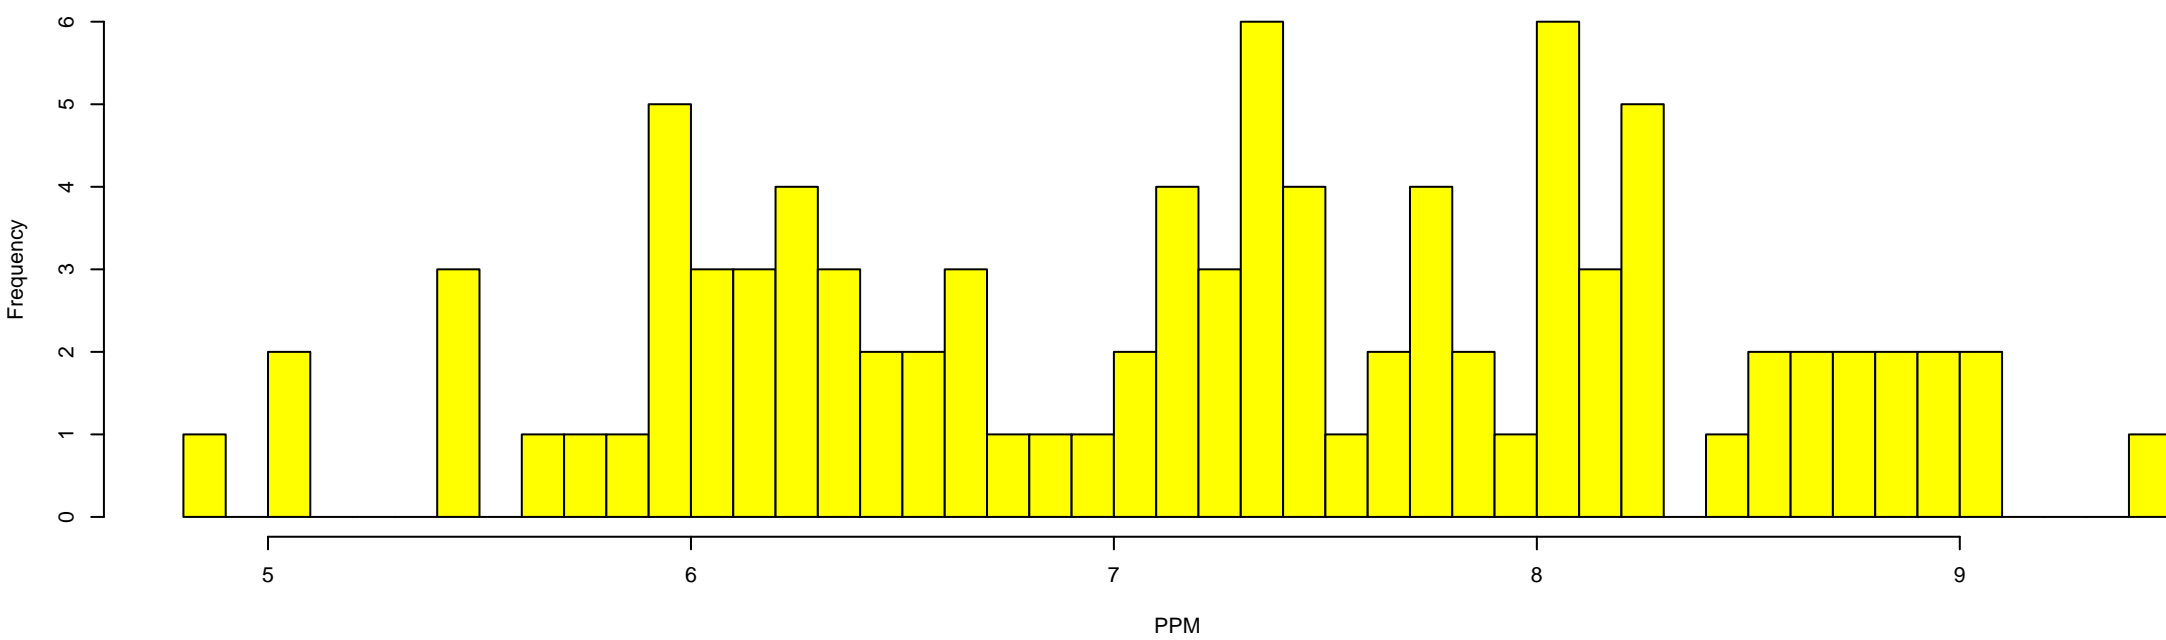

1st Soil Shoot Li

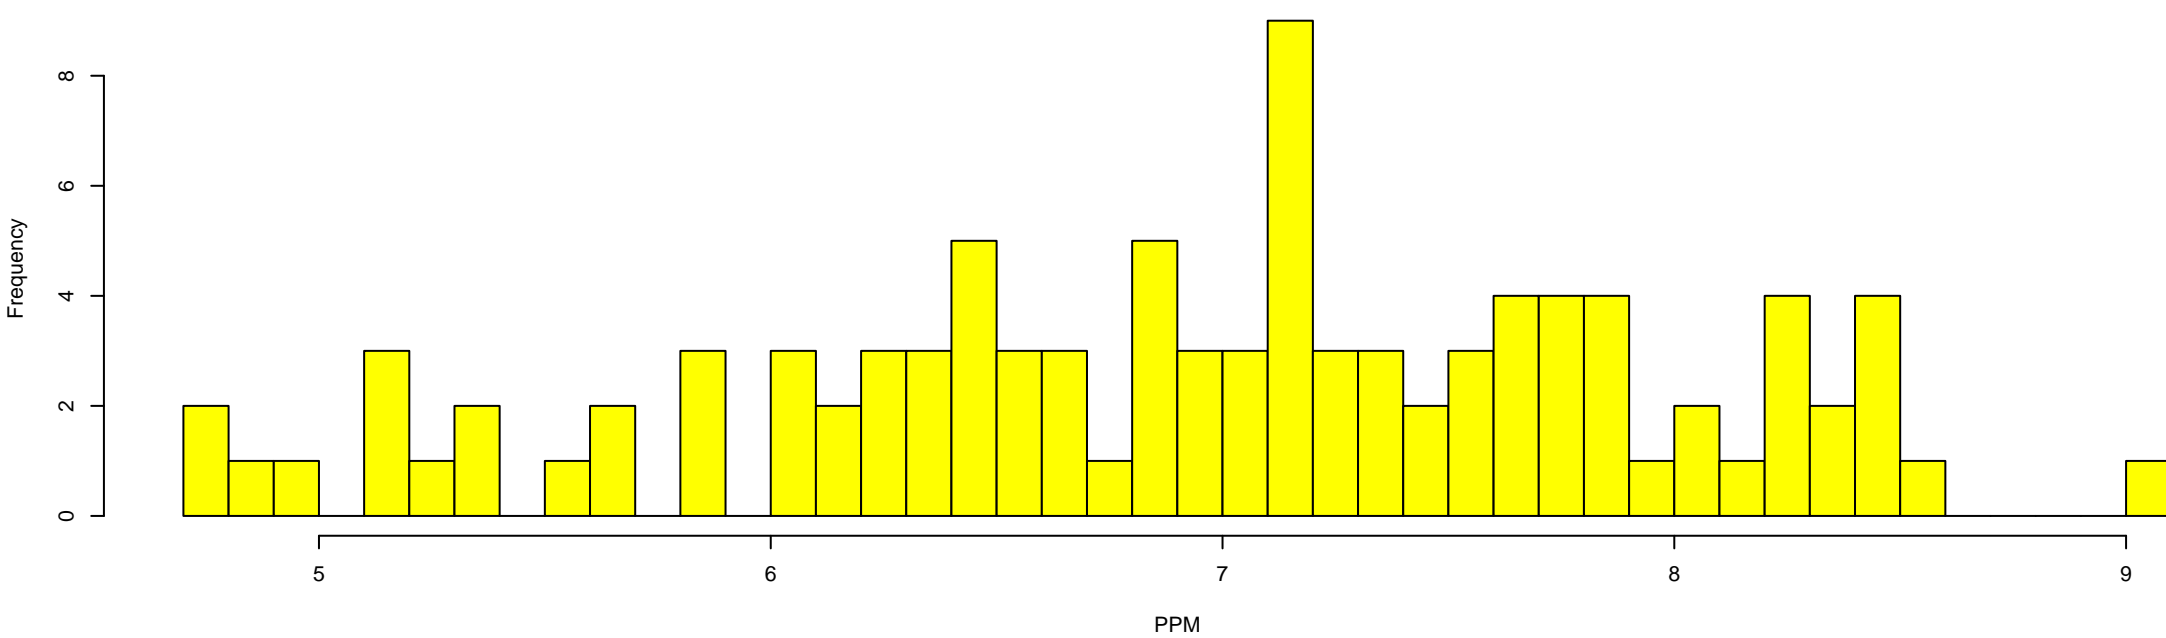

Seed Li

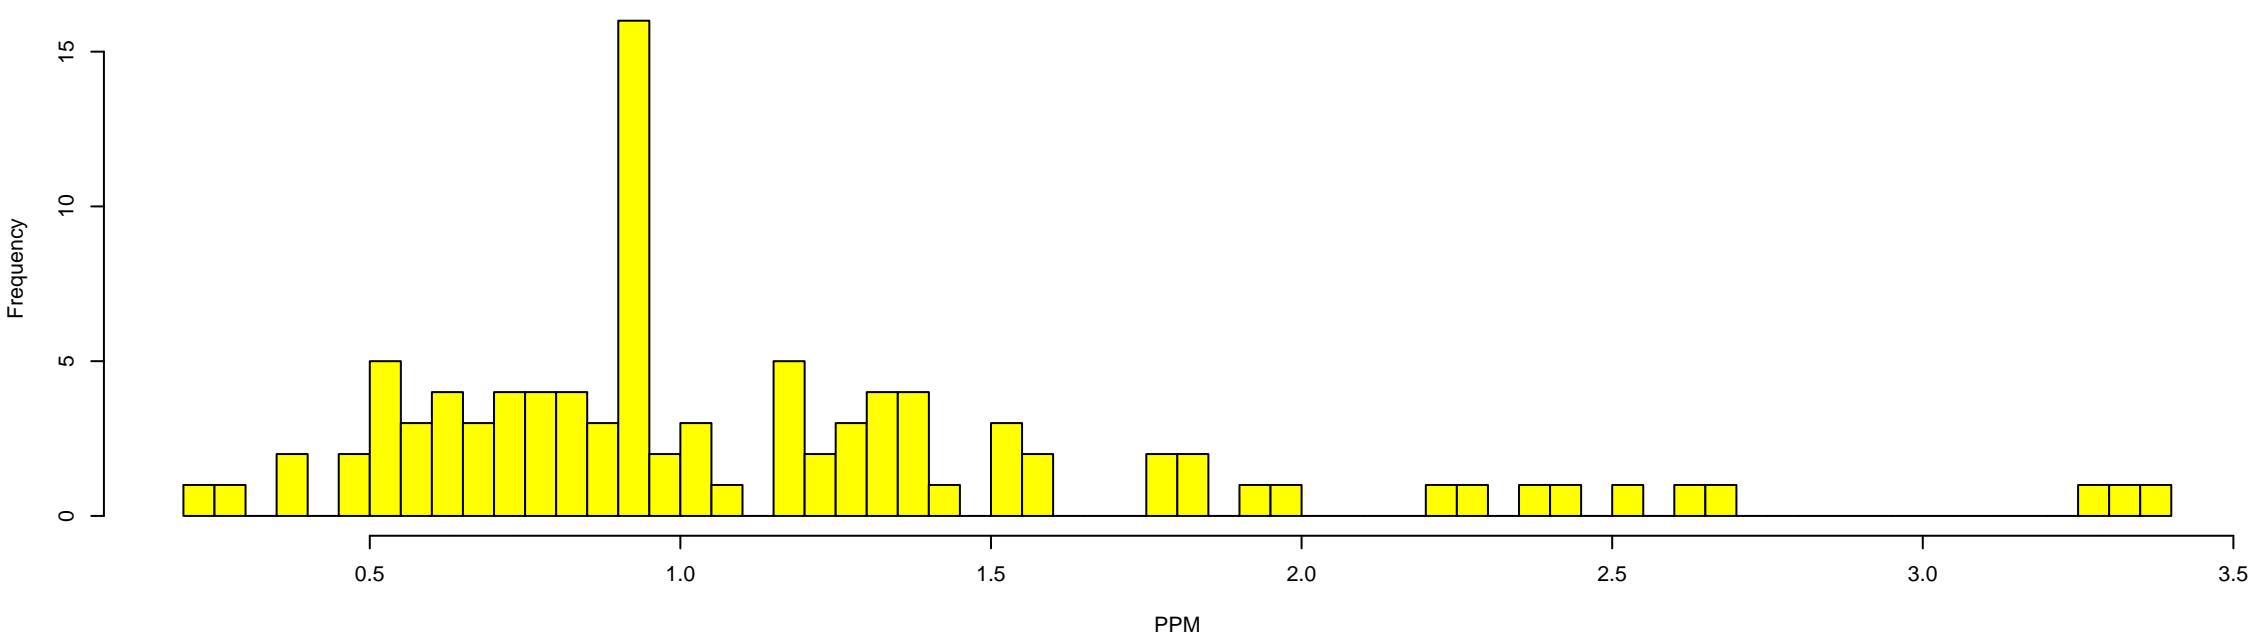

Hydro Root B

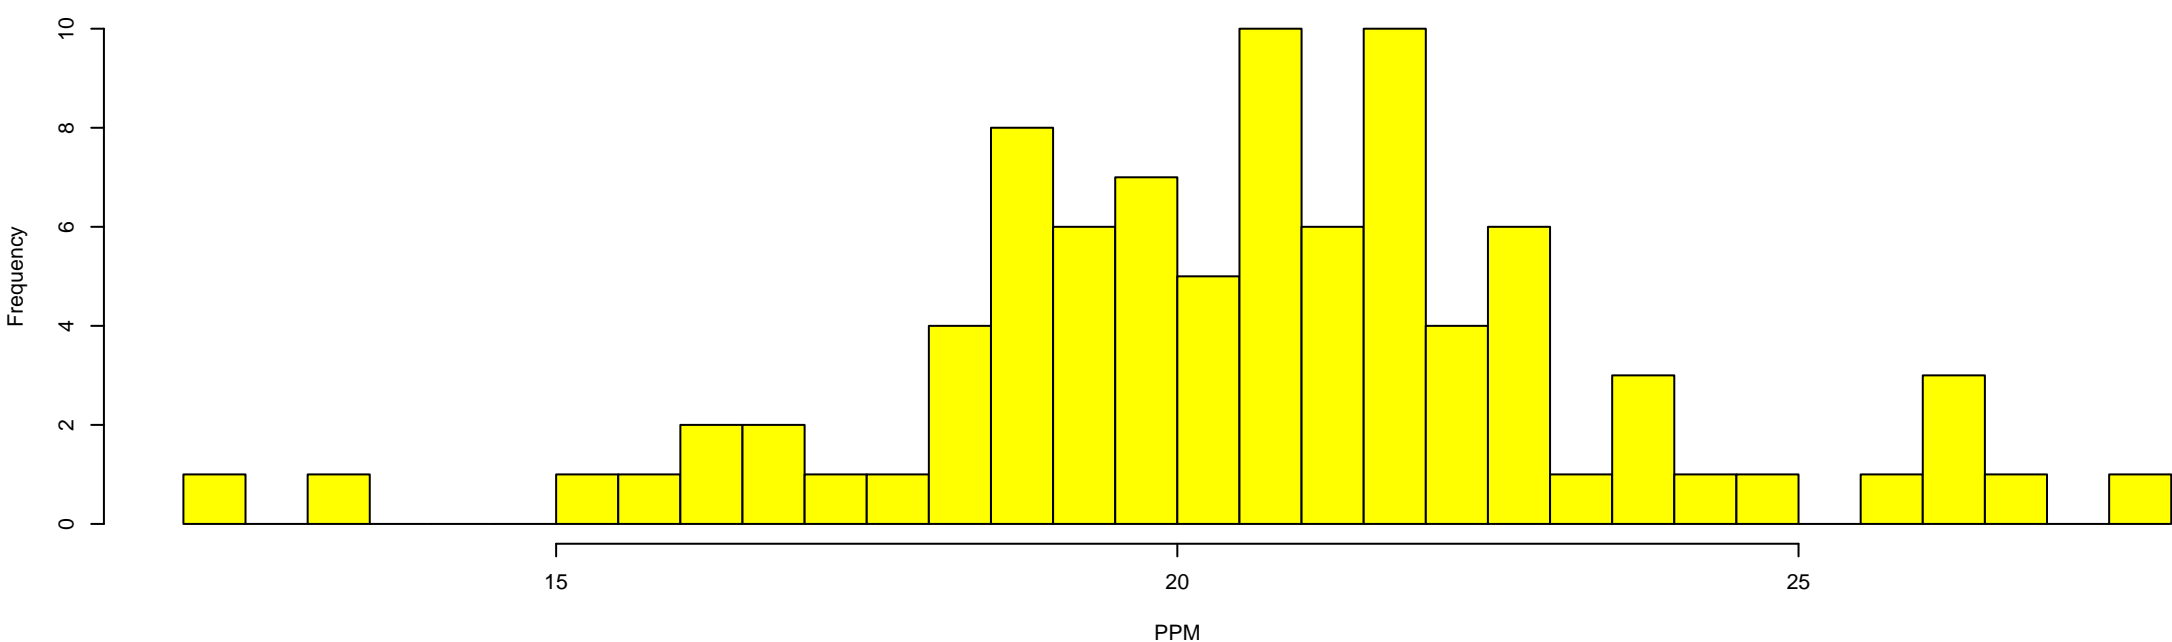

Hydro Shoot B

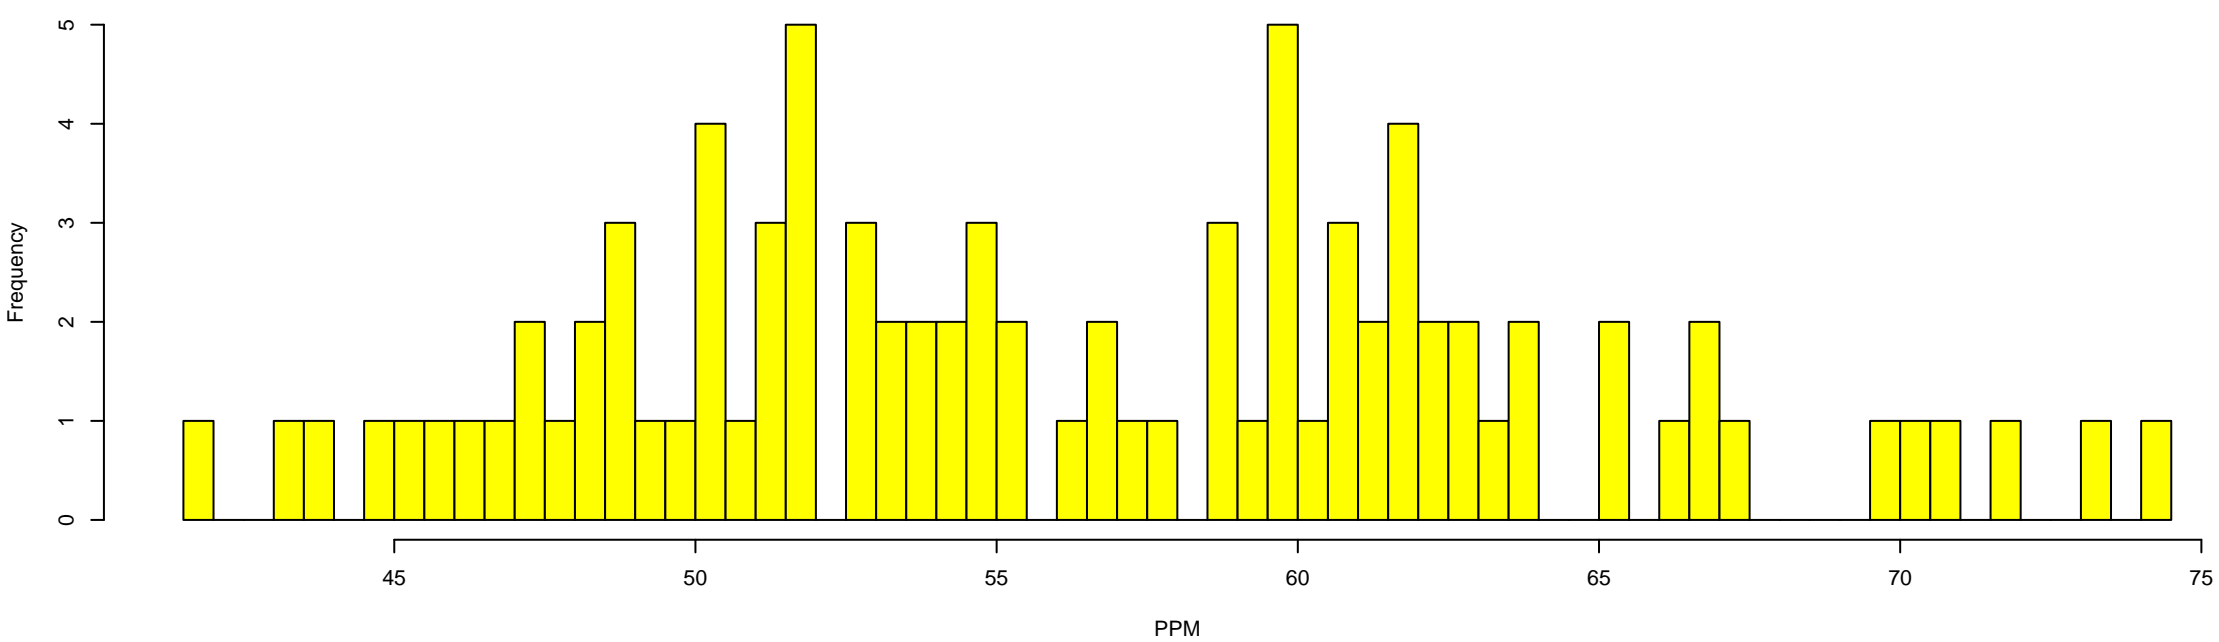

2nd Soil Shoot B

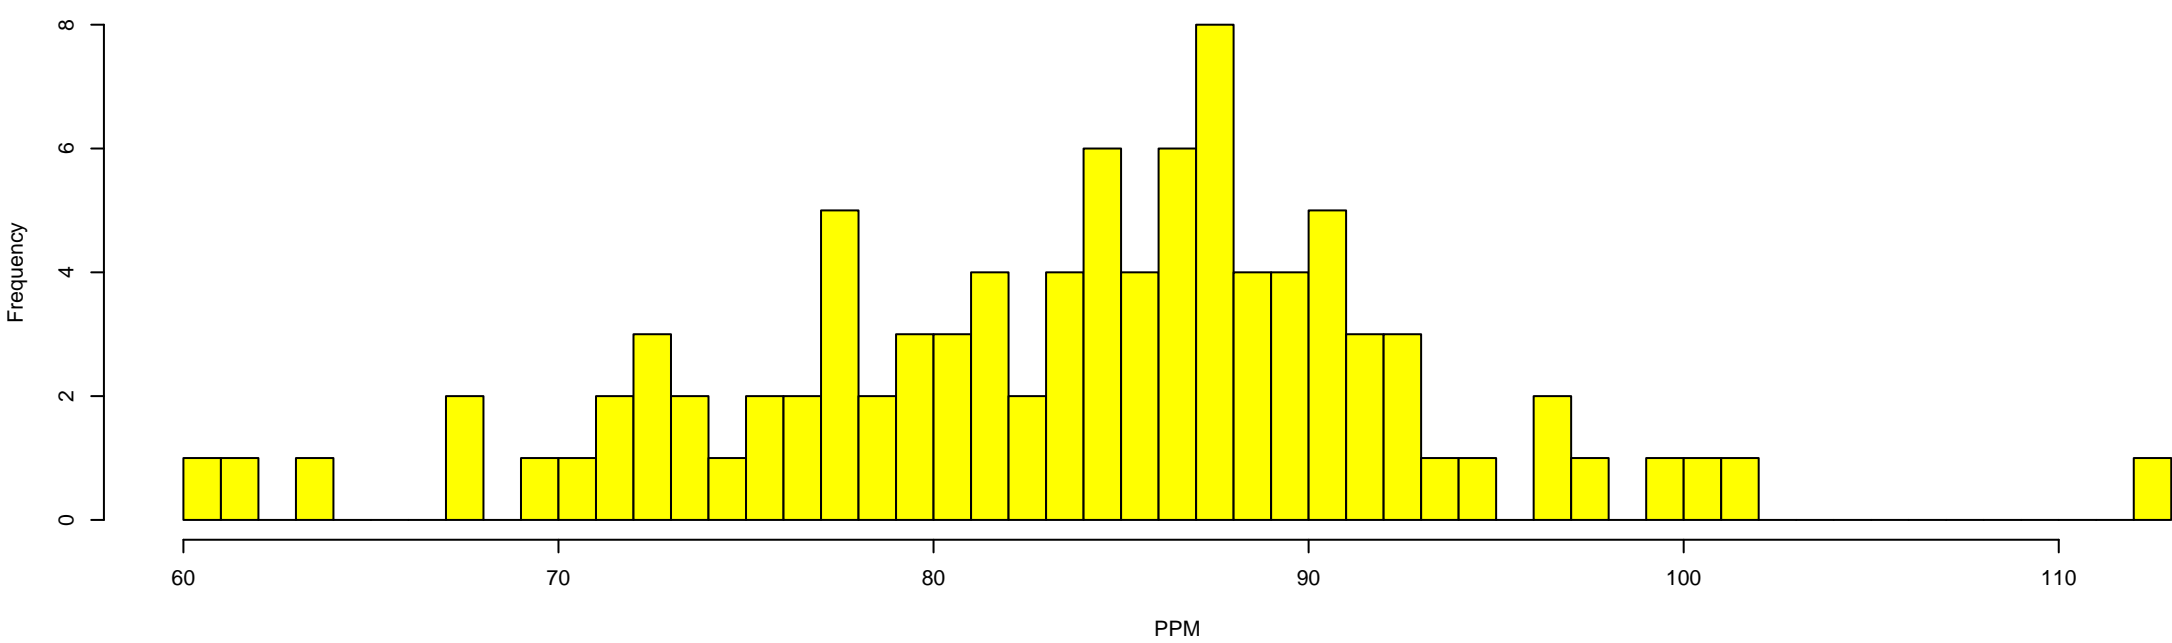

1st Soil Shoot B

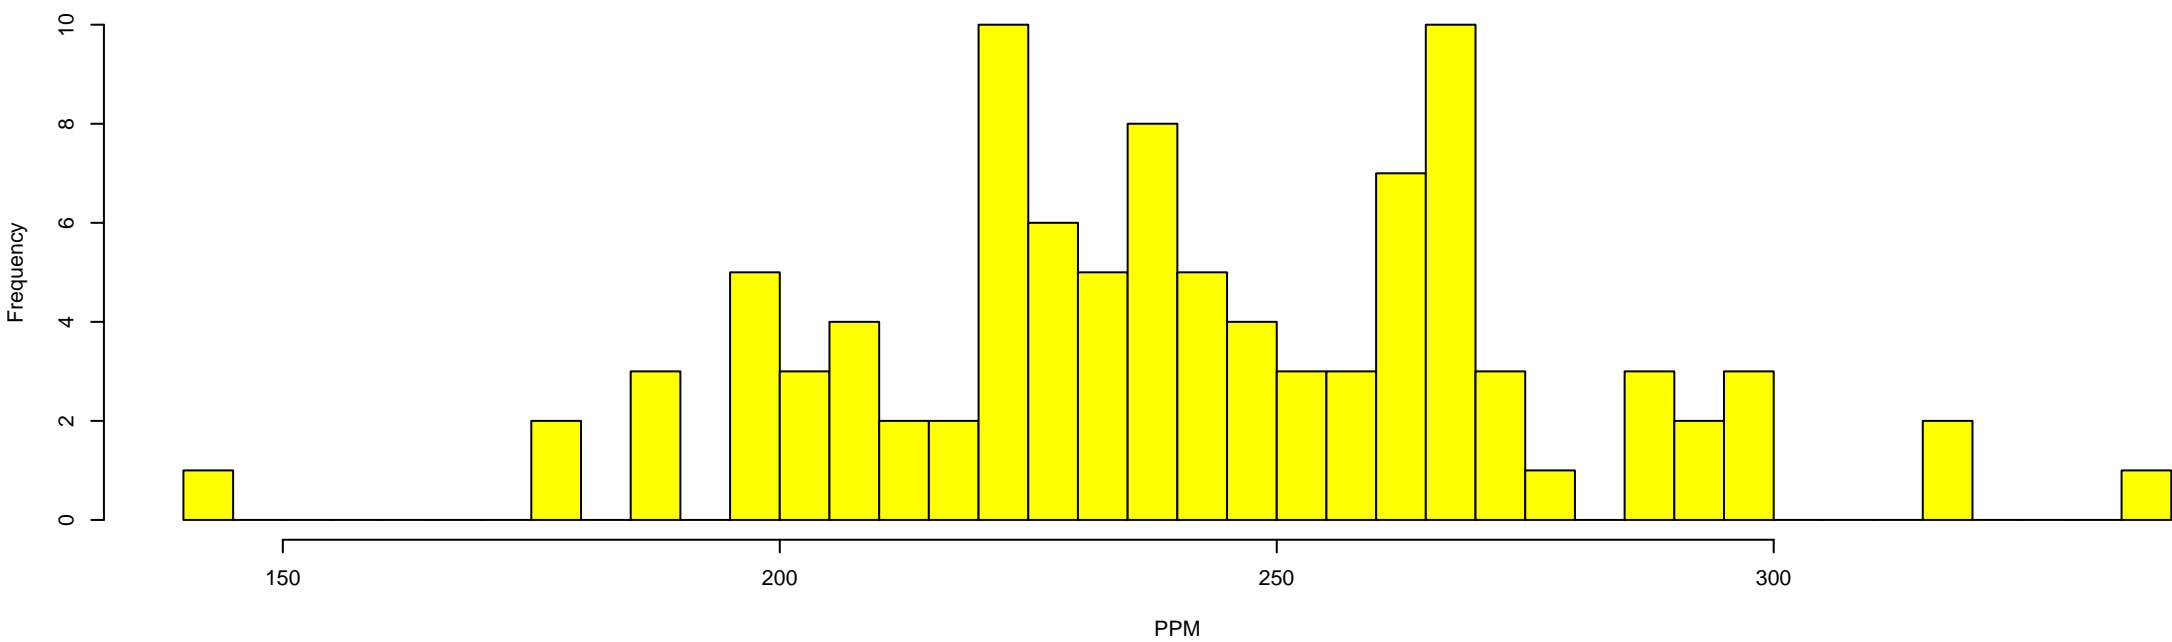

Seed B

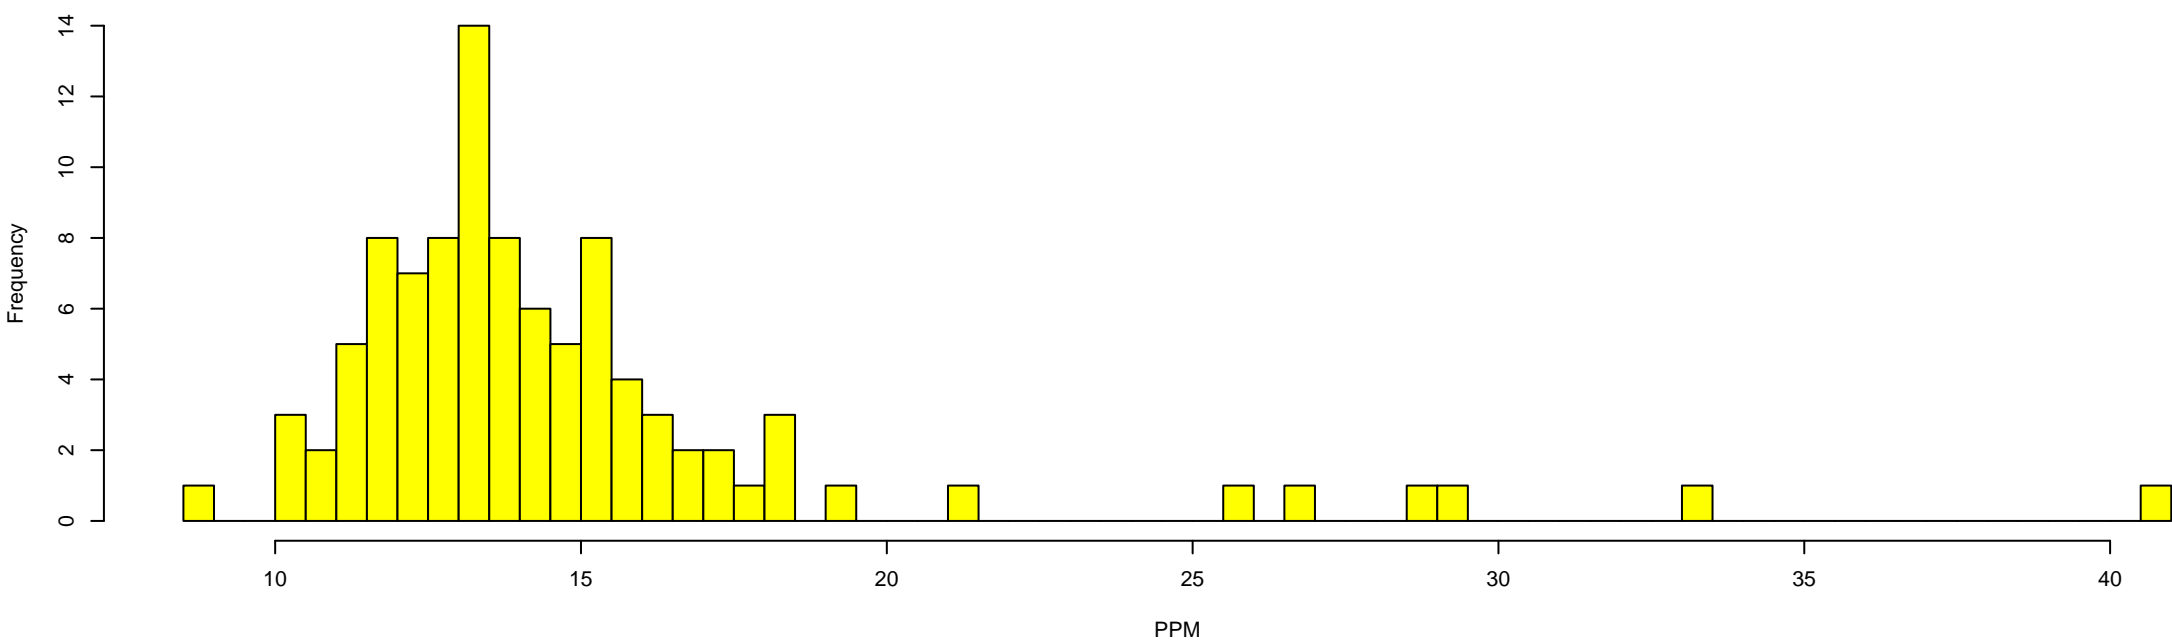

Hydro Root Na

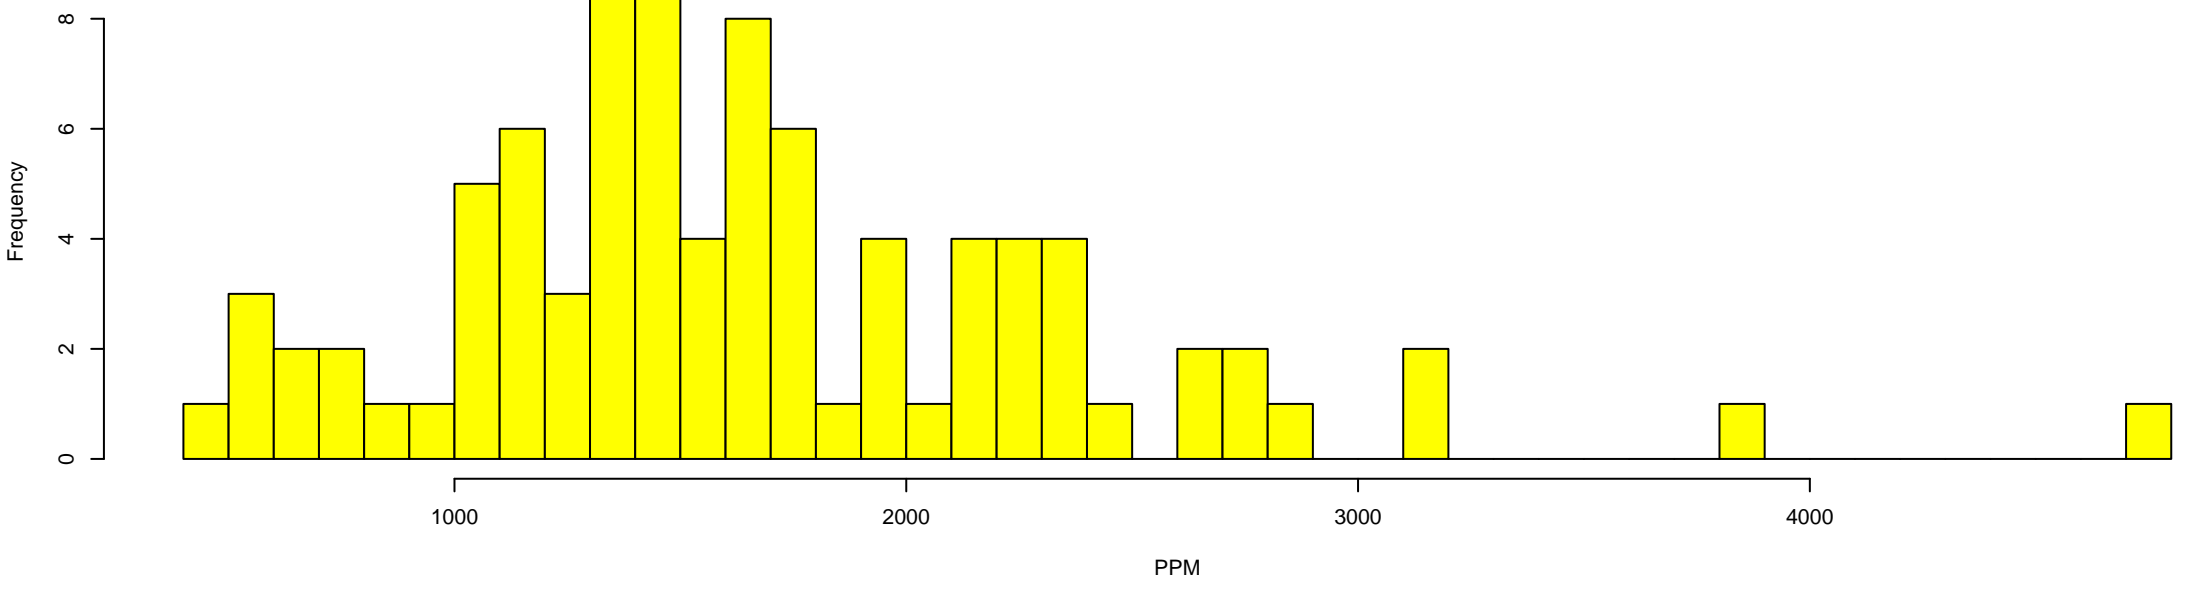

Hydro Shoot Na

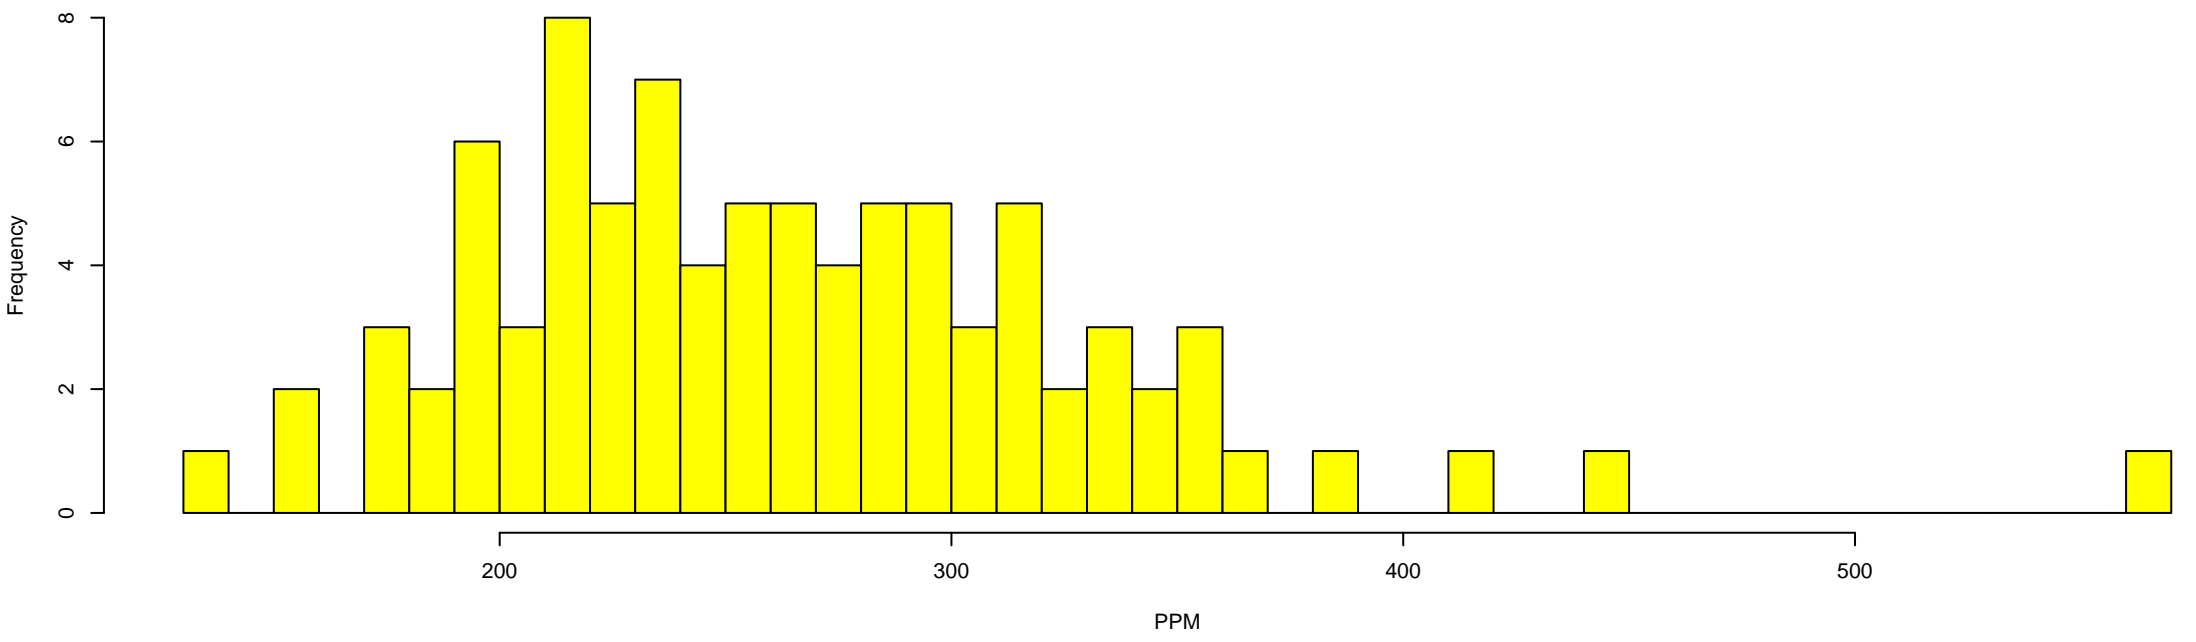

2nd Soil Shoot Na

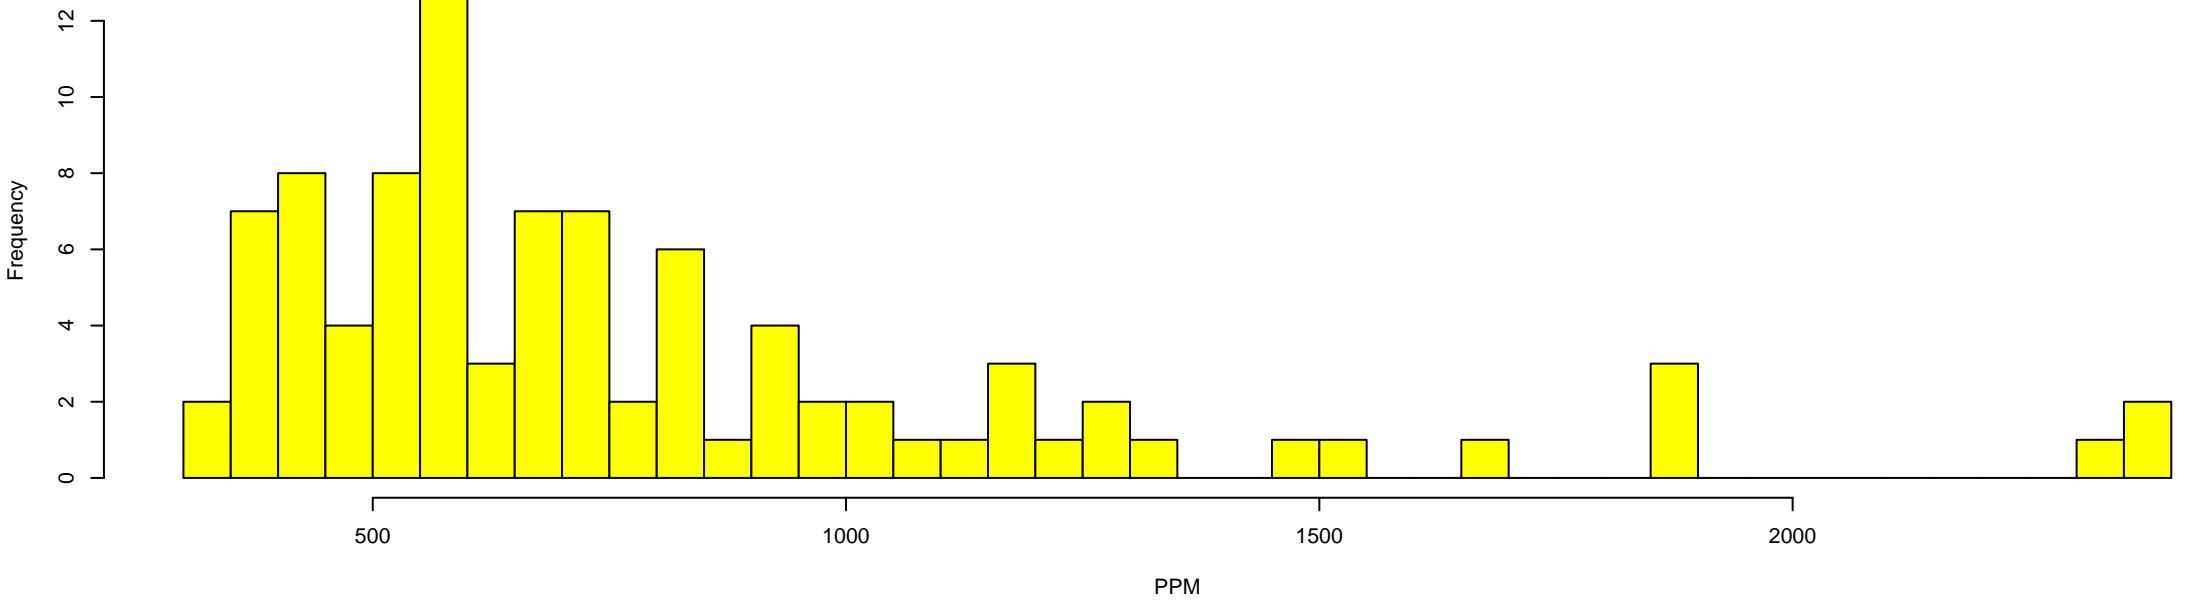

1st Soil Shoot Na

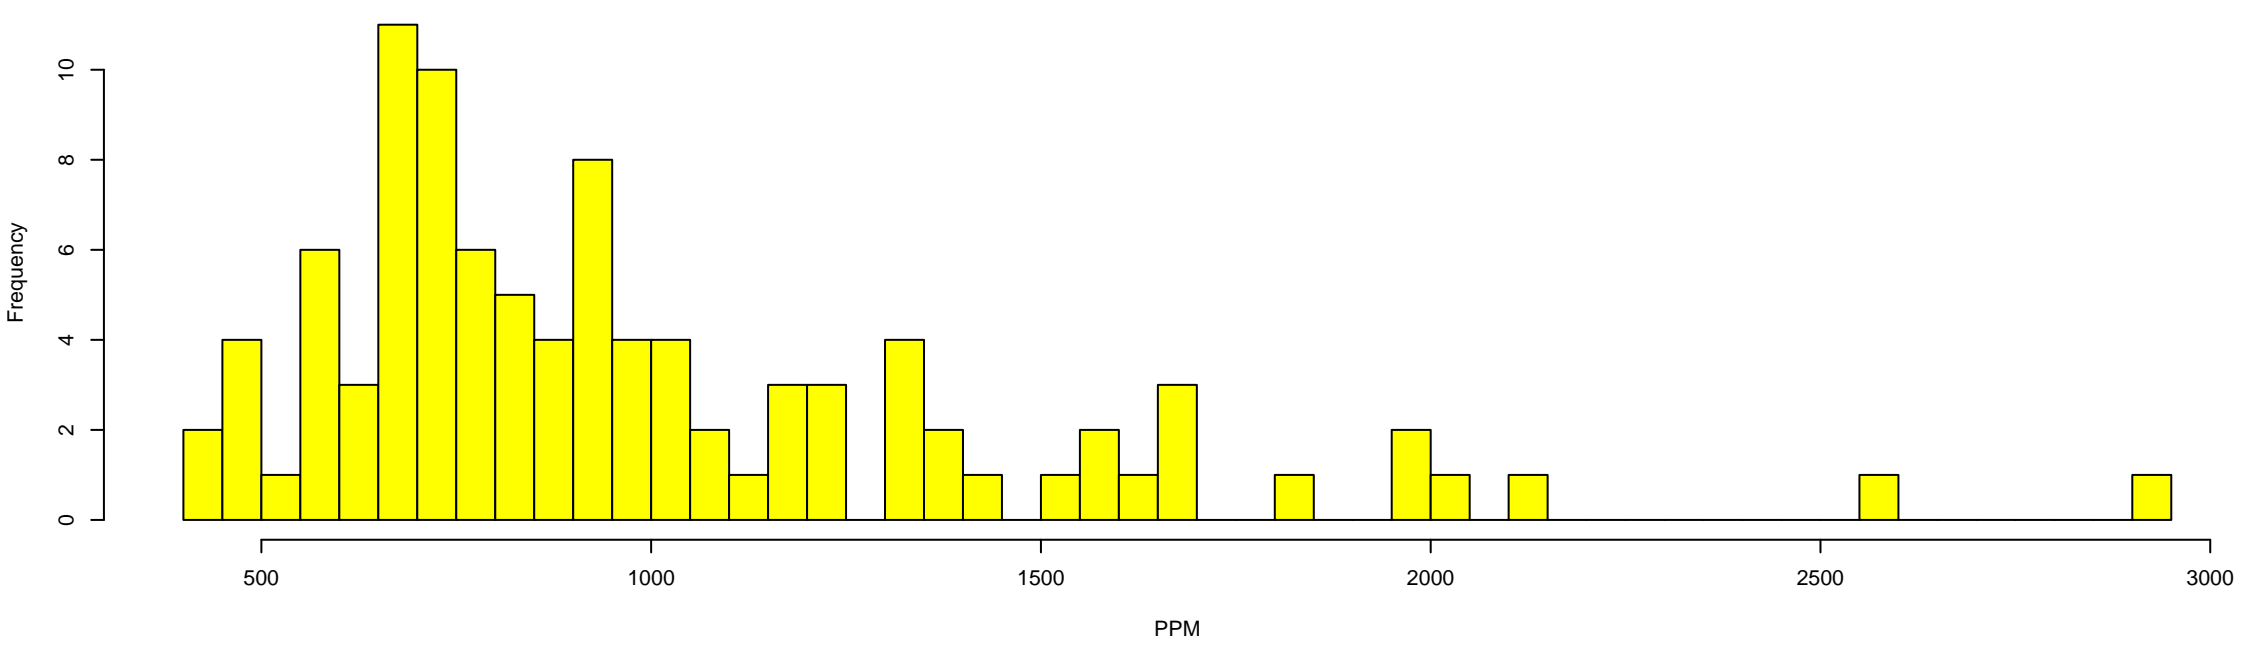

Seed Na

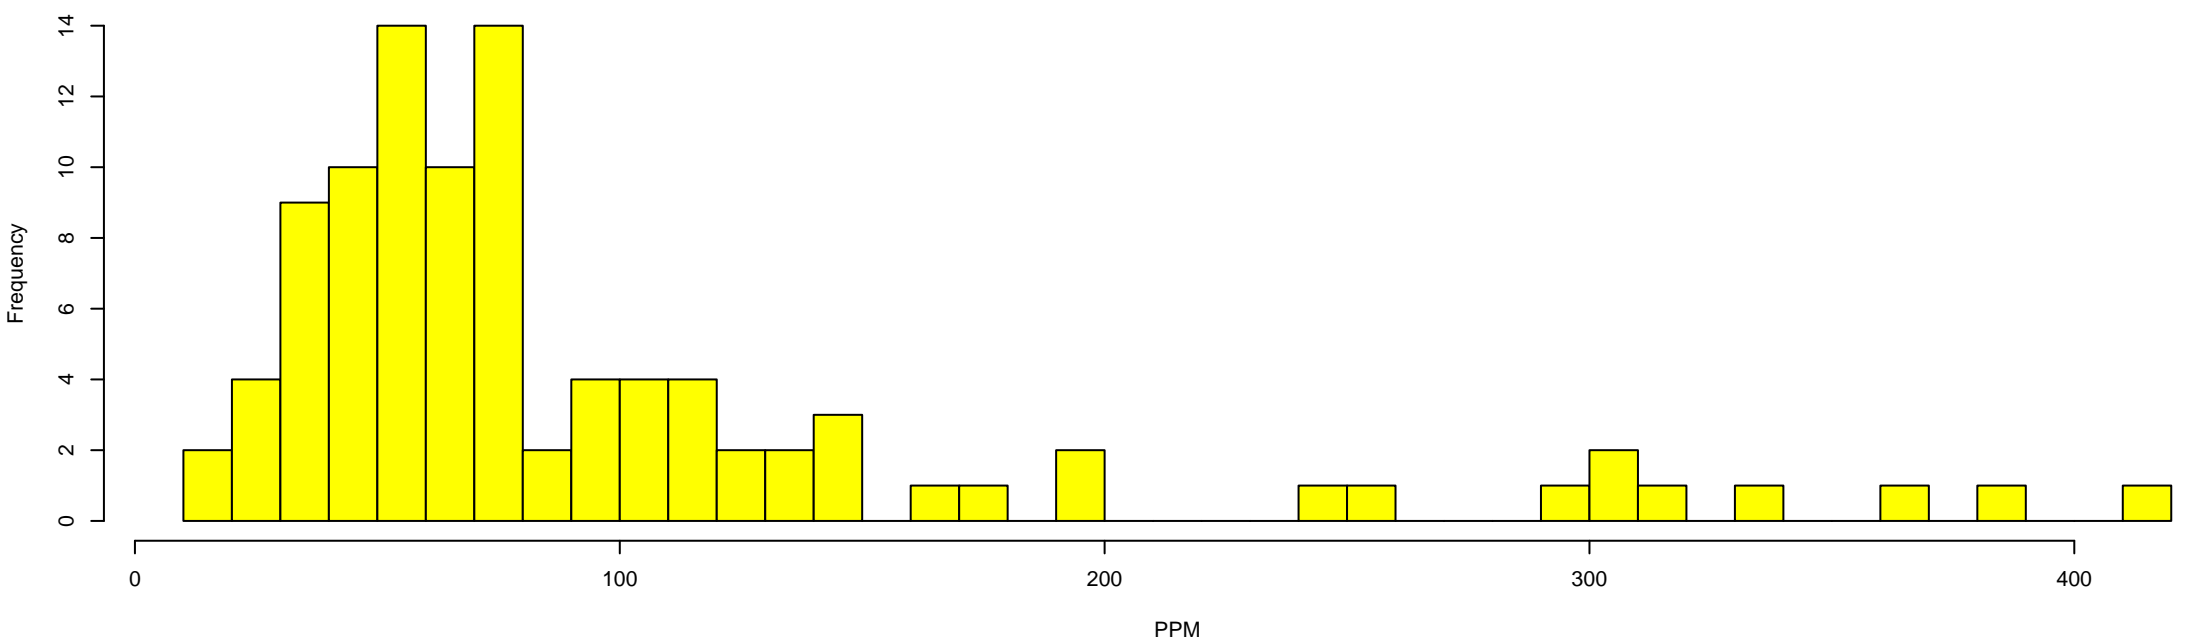

Hydro Root Mg

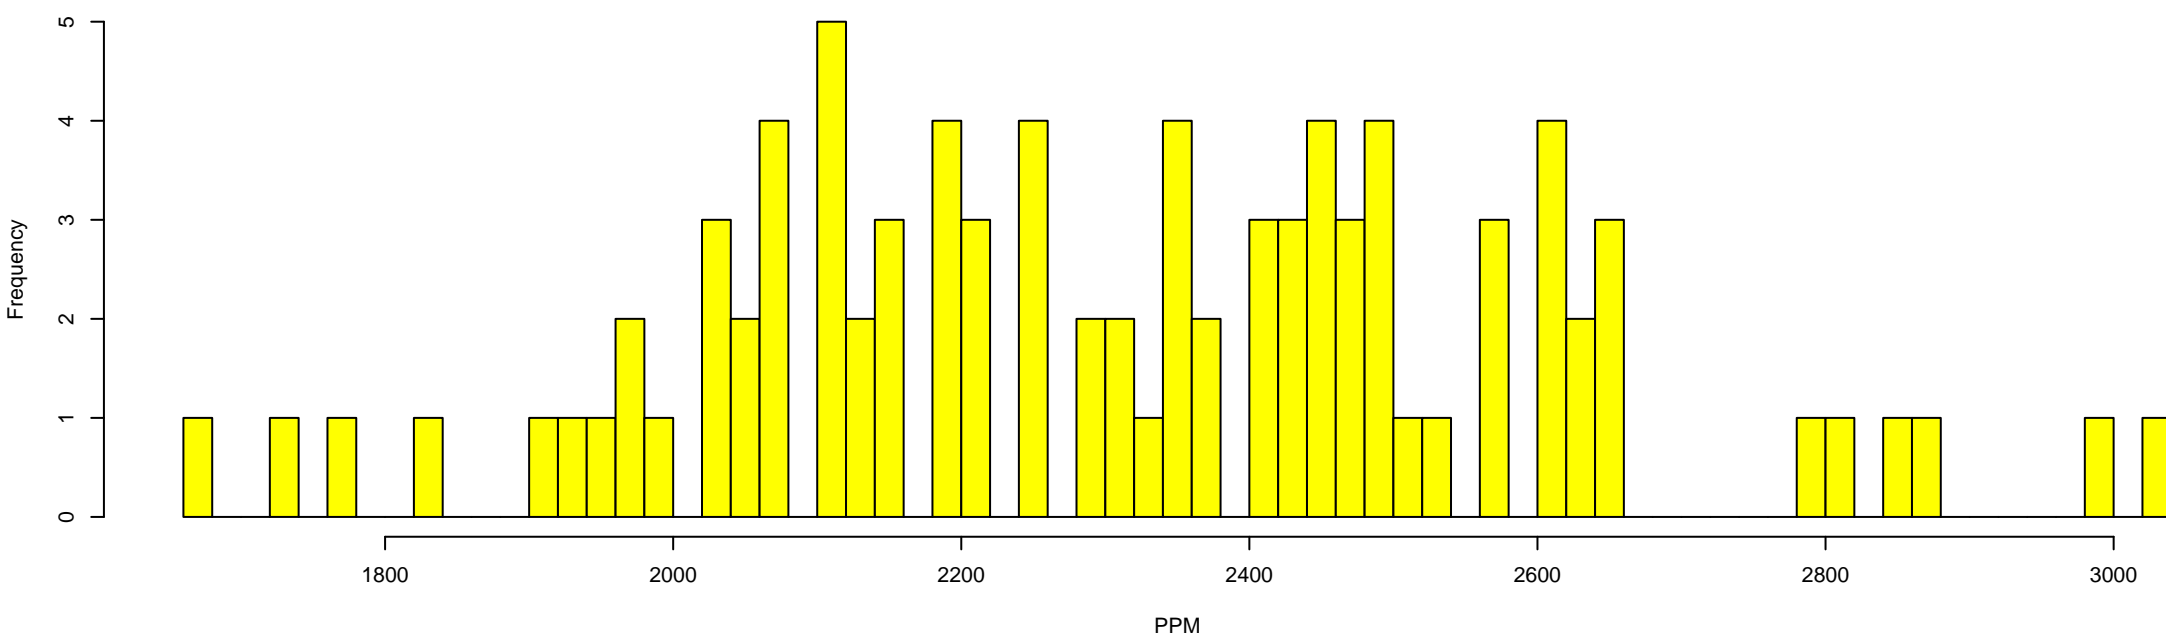

Hydro Shoot Mg

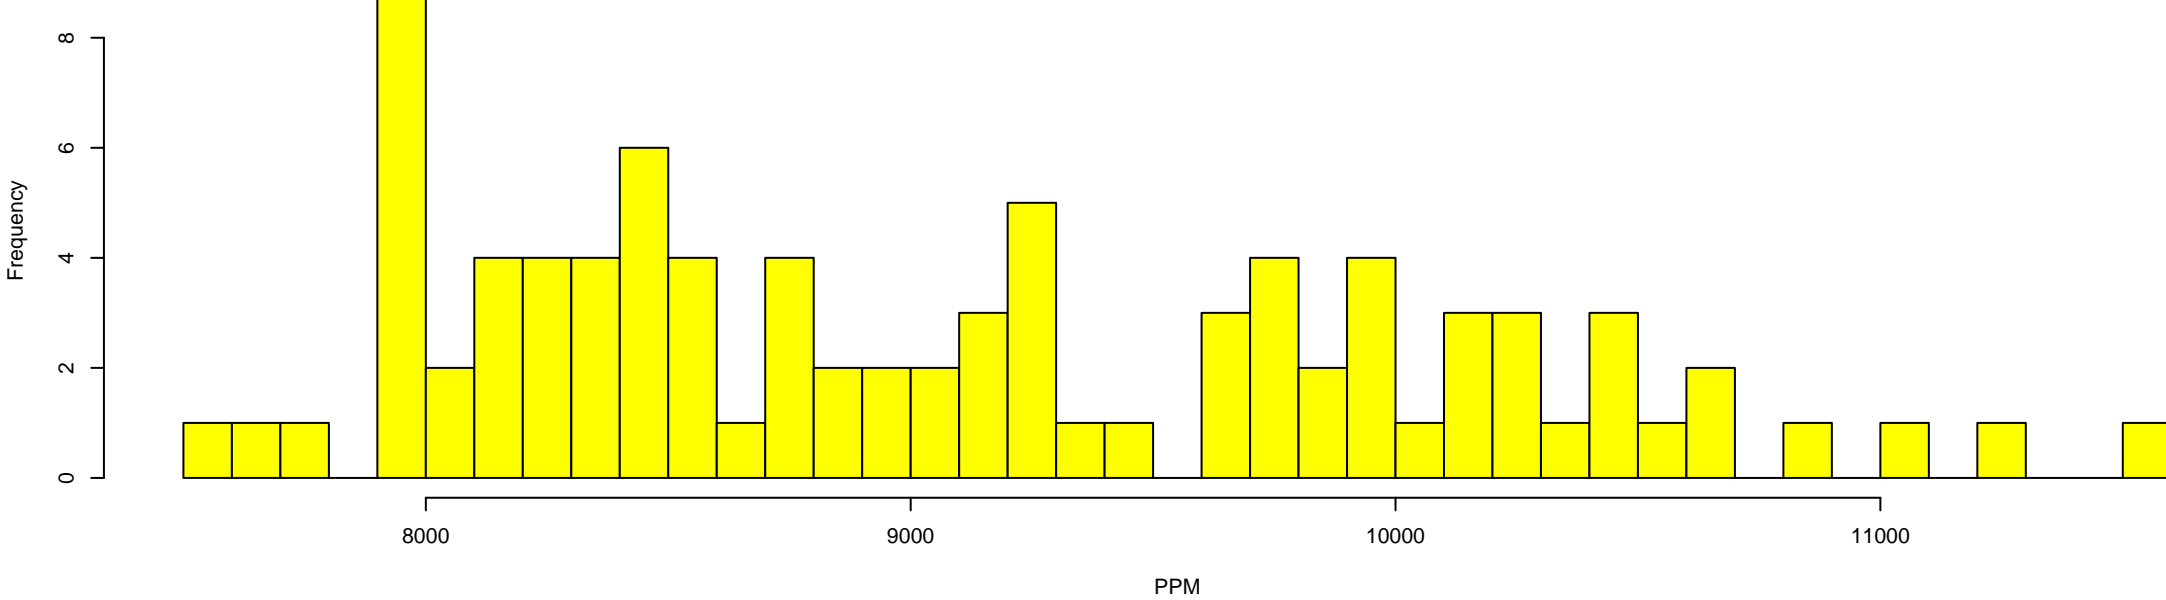

2nd Soil Shoot Mg

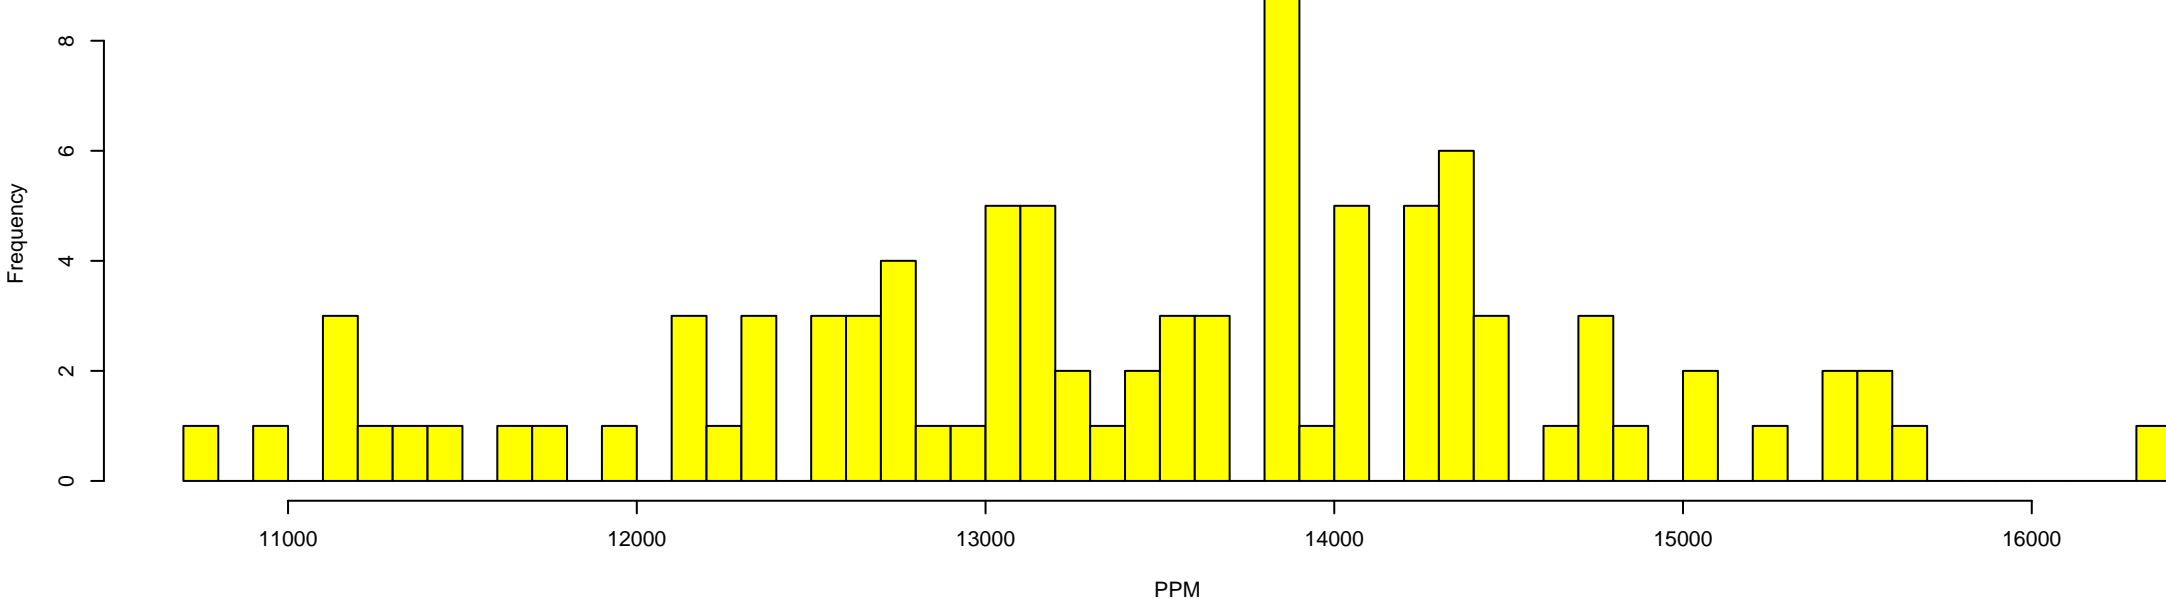

1st Soil Shoot Mg

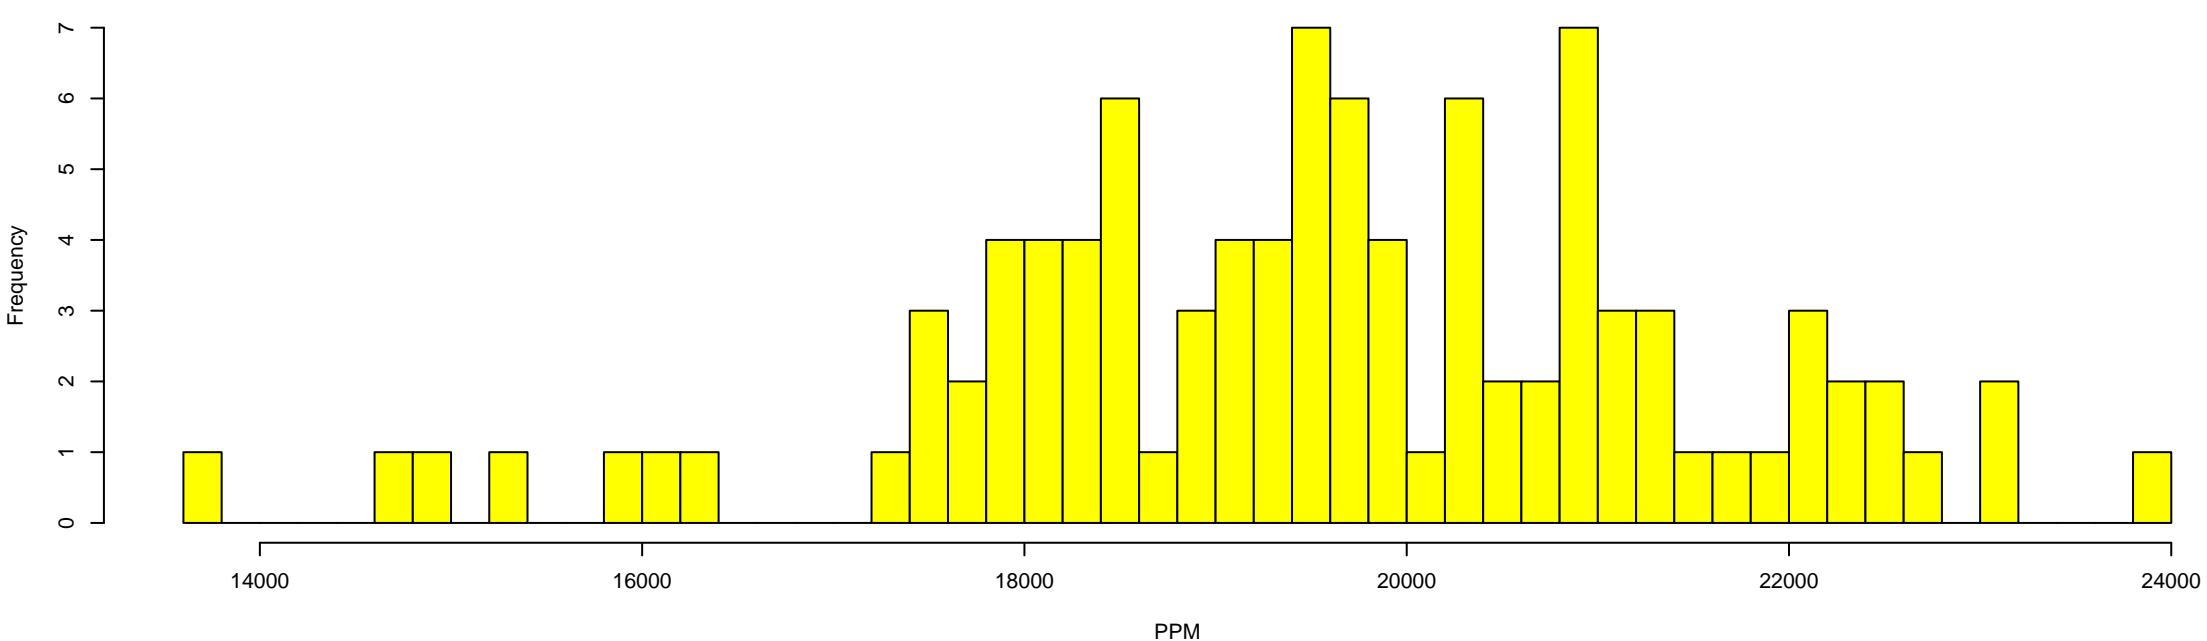

Seed Mg

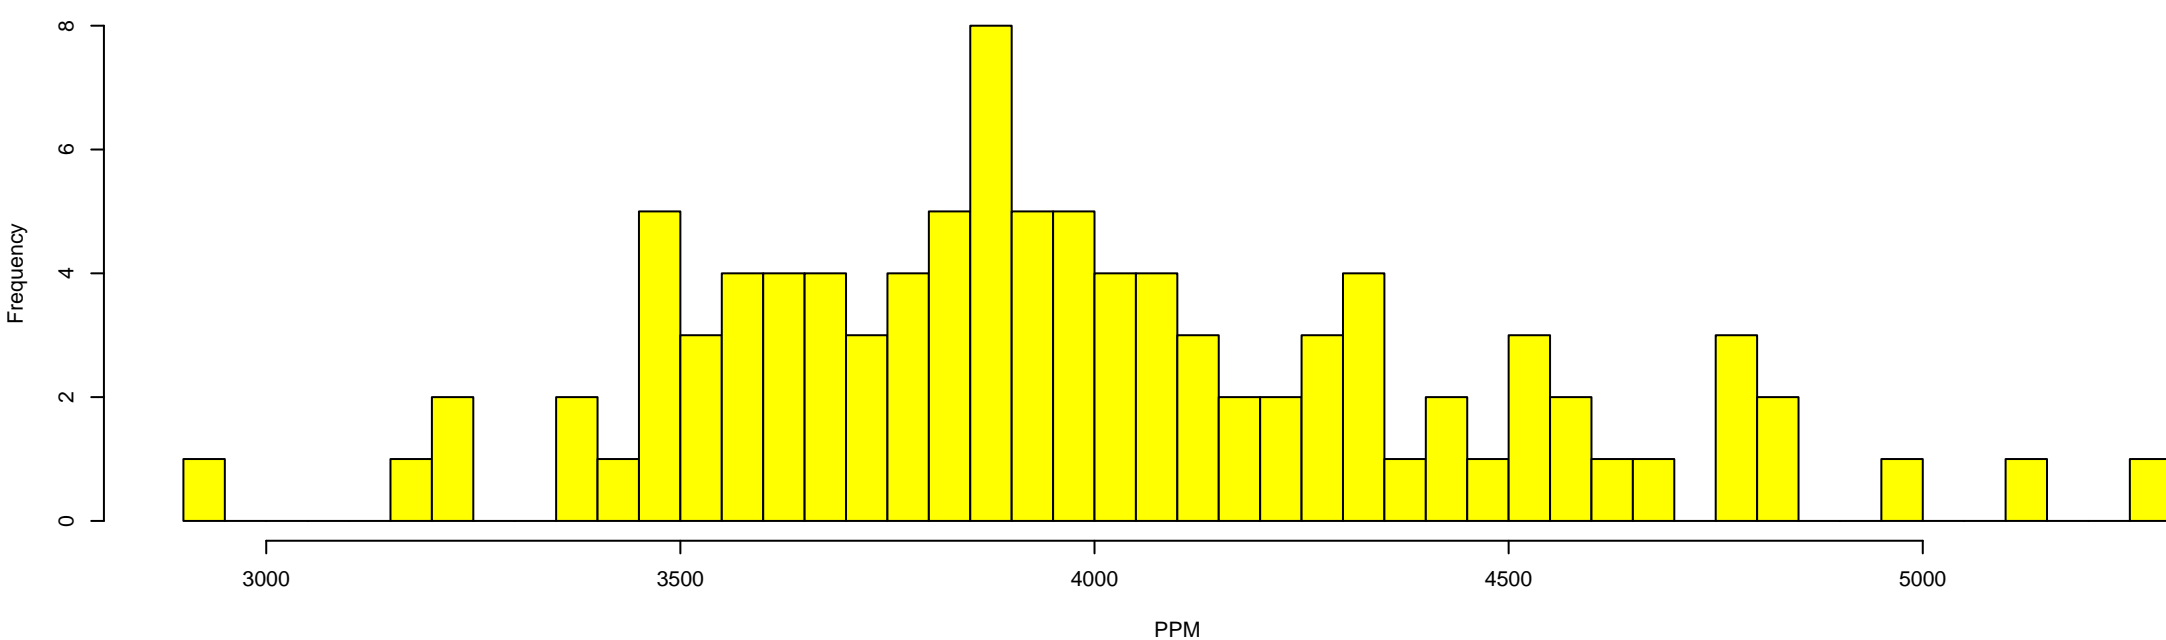

Hydro Root P

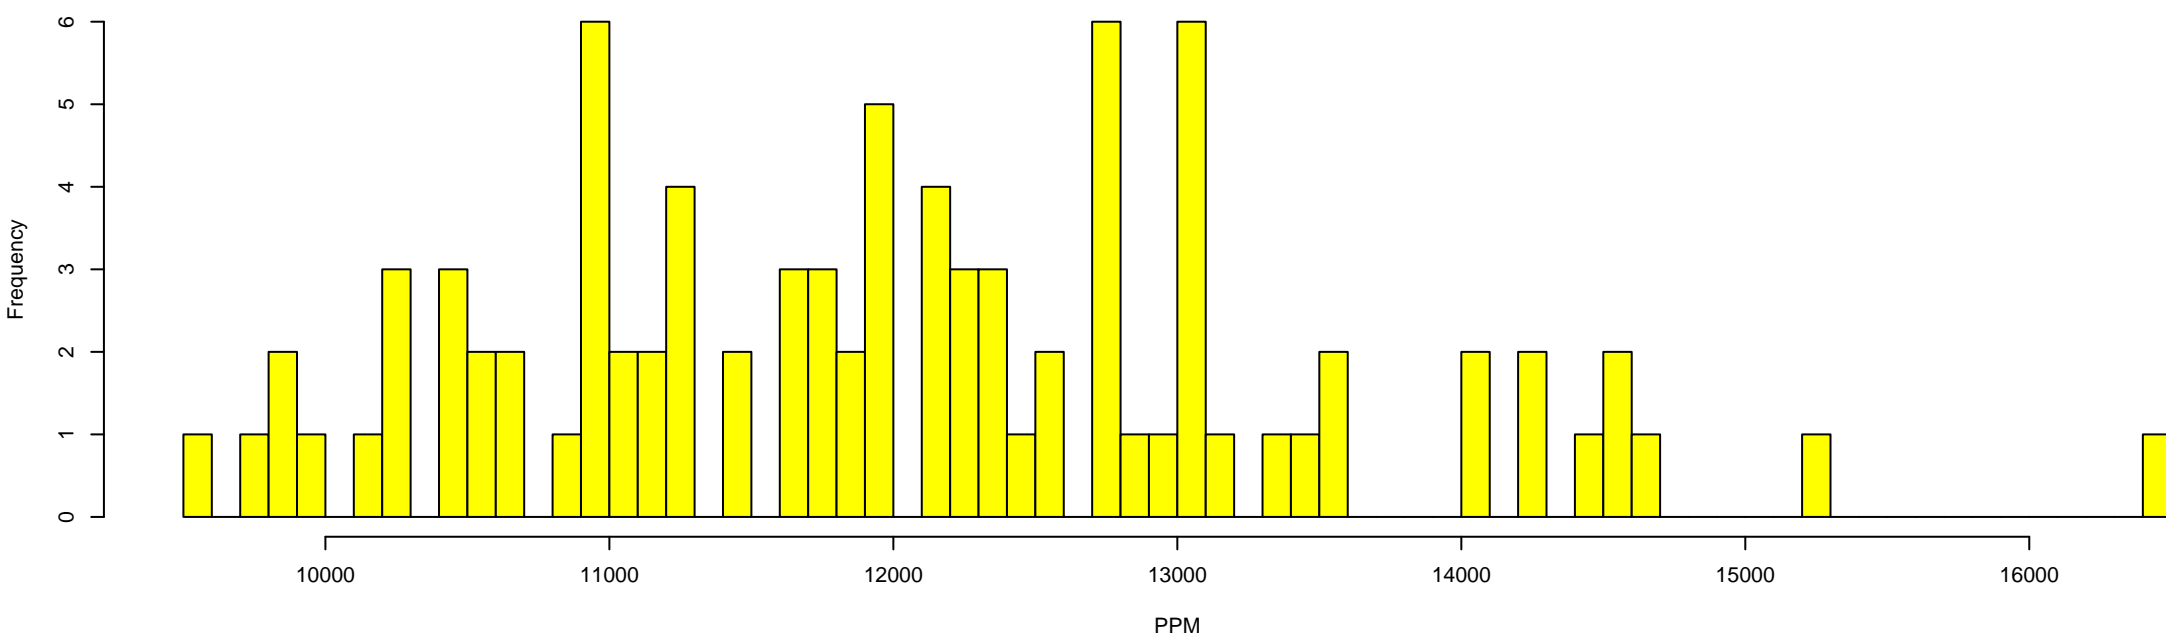

Hydro Shoot P

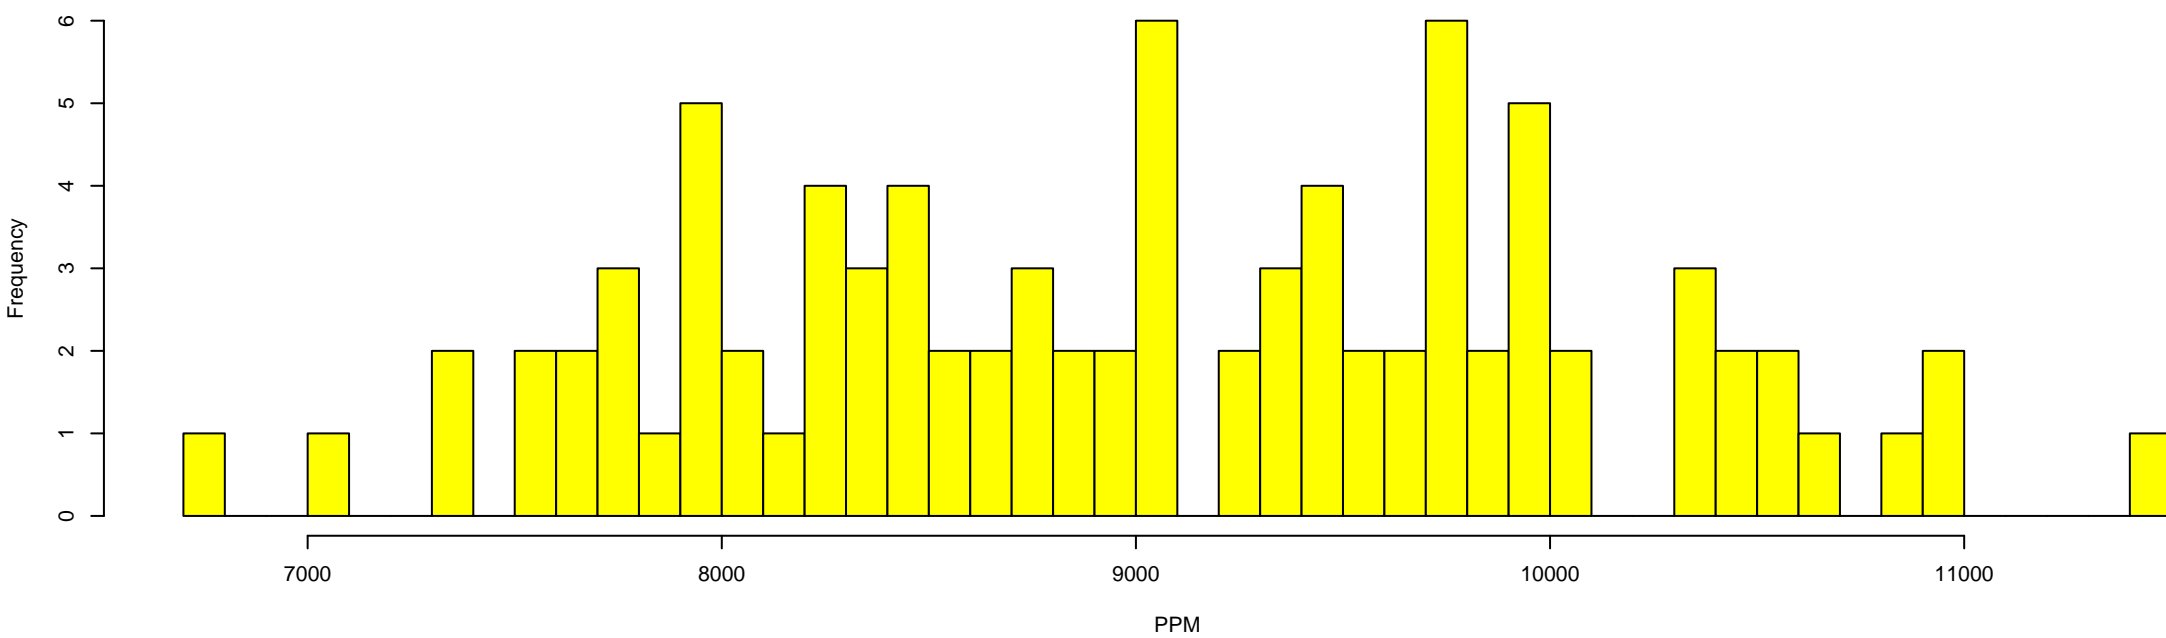

2nd Soil Shoot P

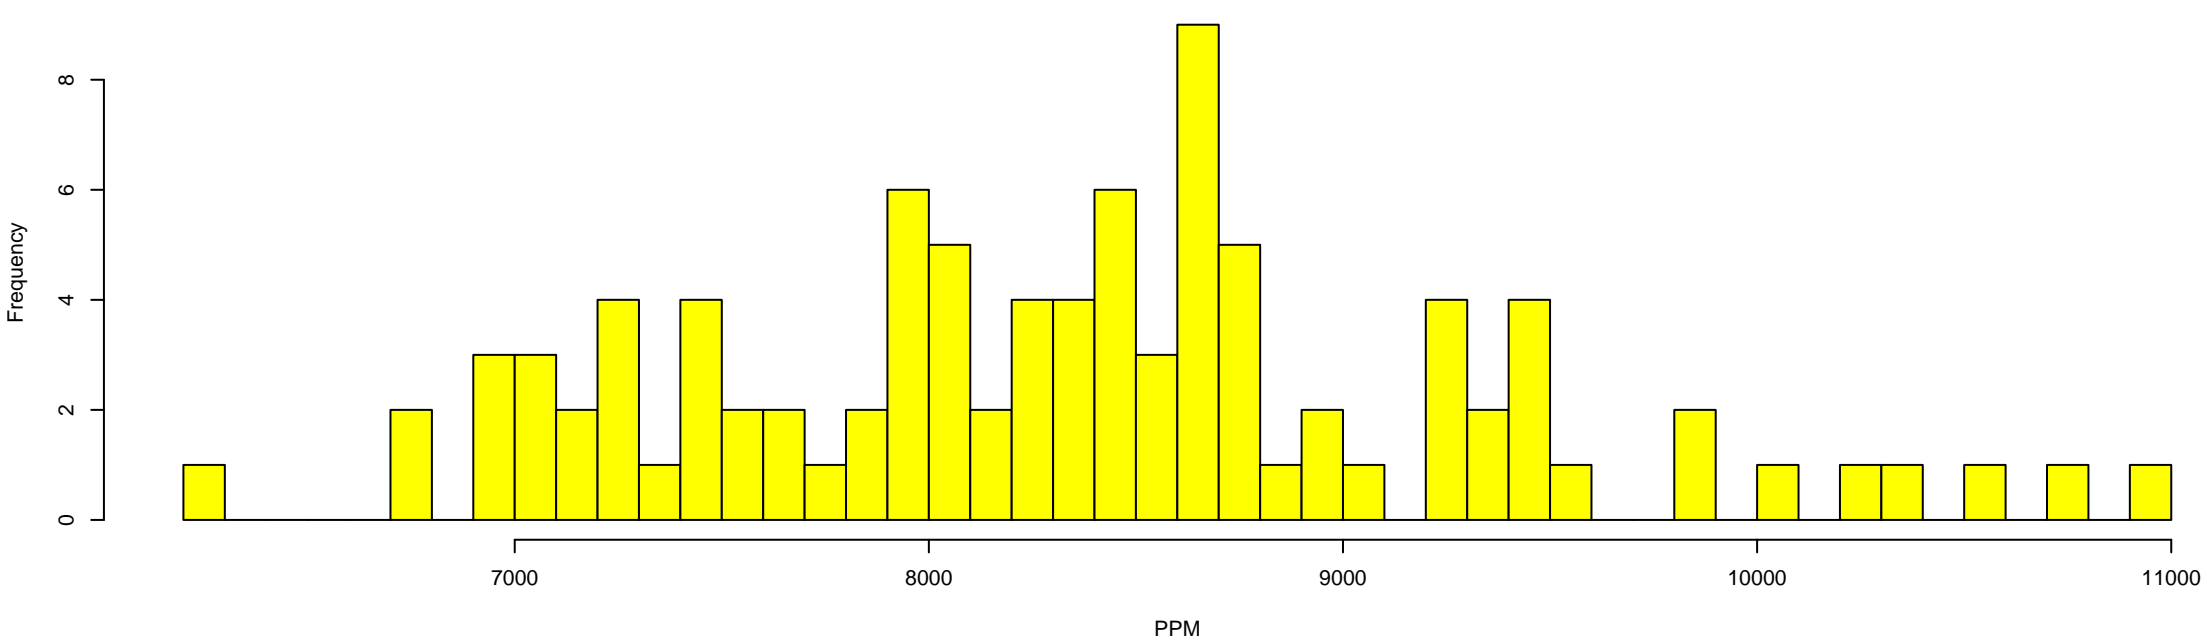

1st Soil Shoot P

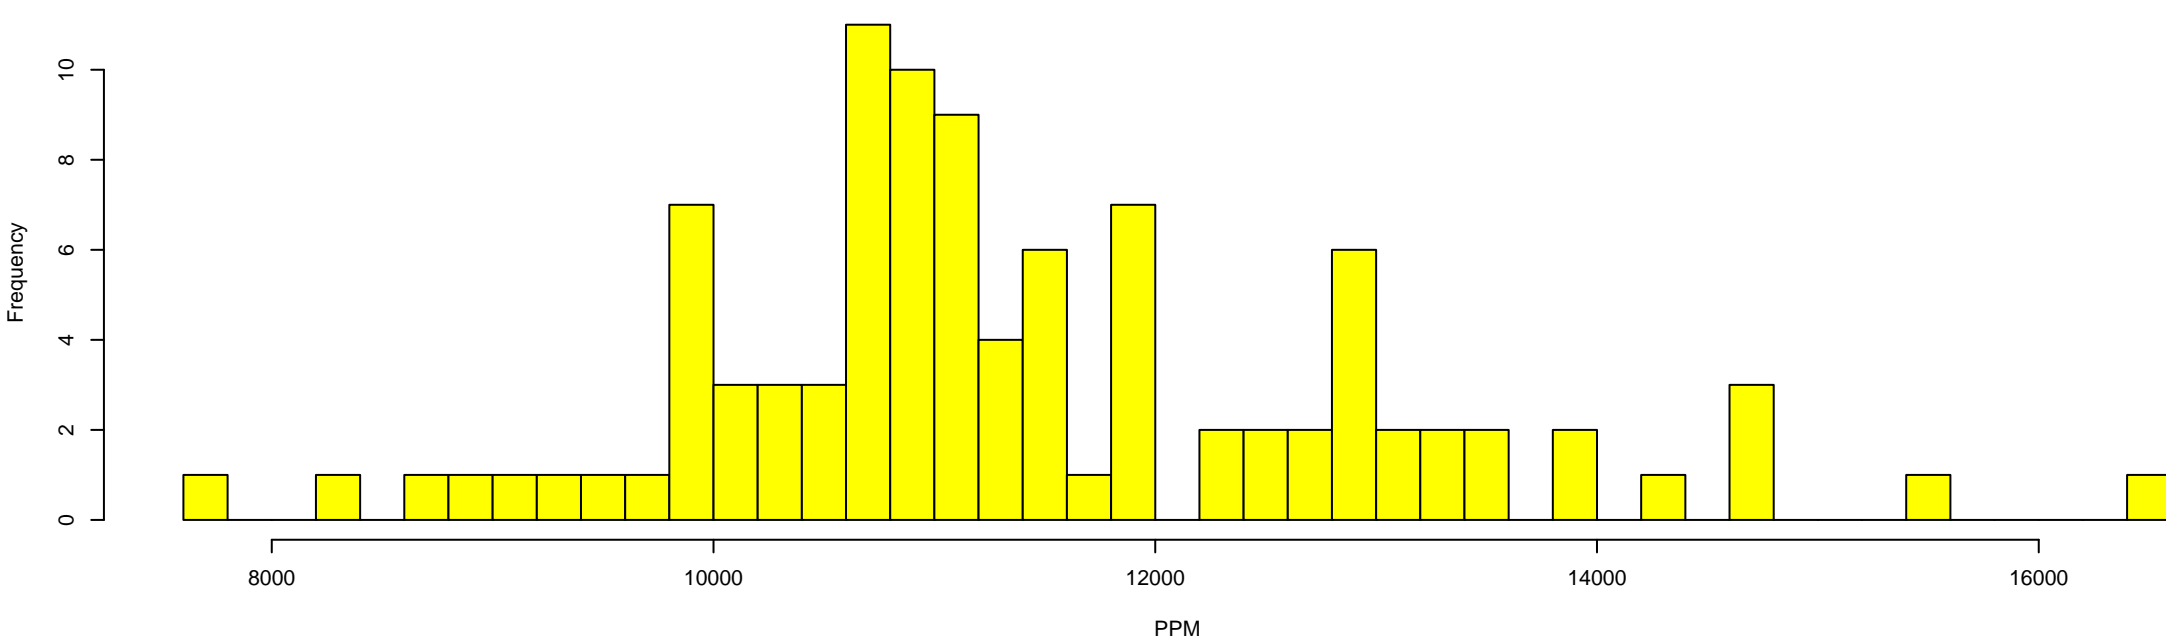

Seed P

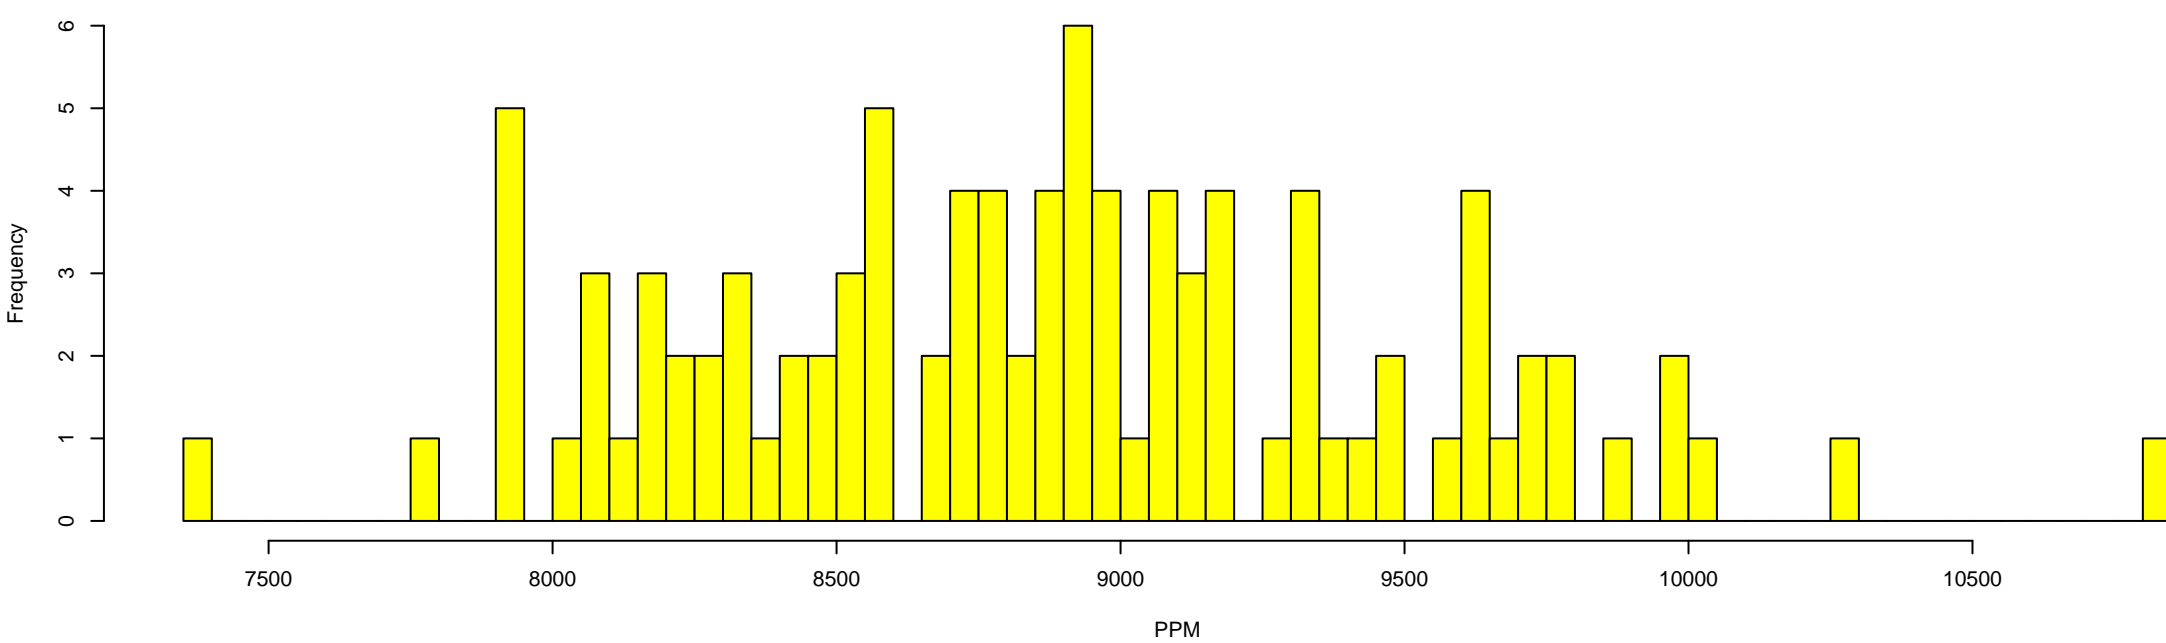

Hydro Root S

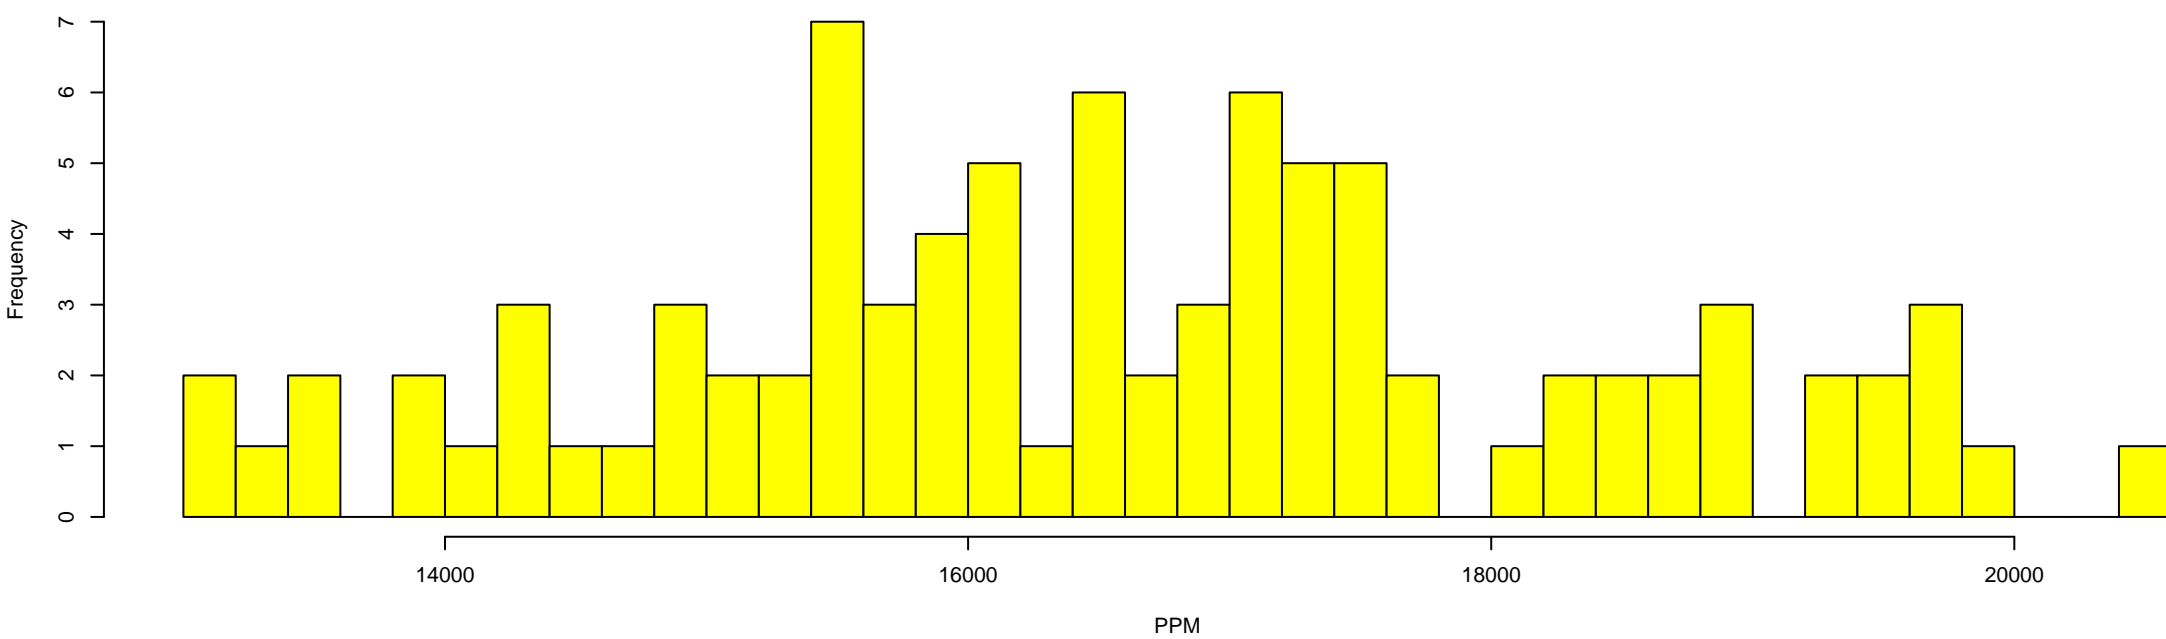

Hydro Shoot S

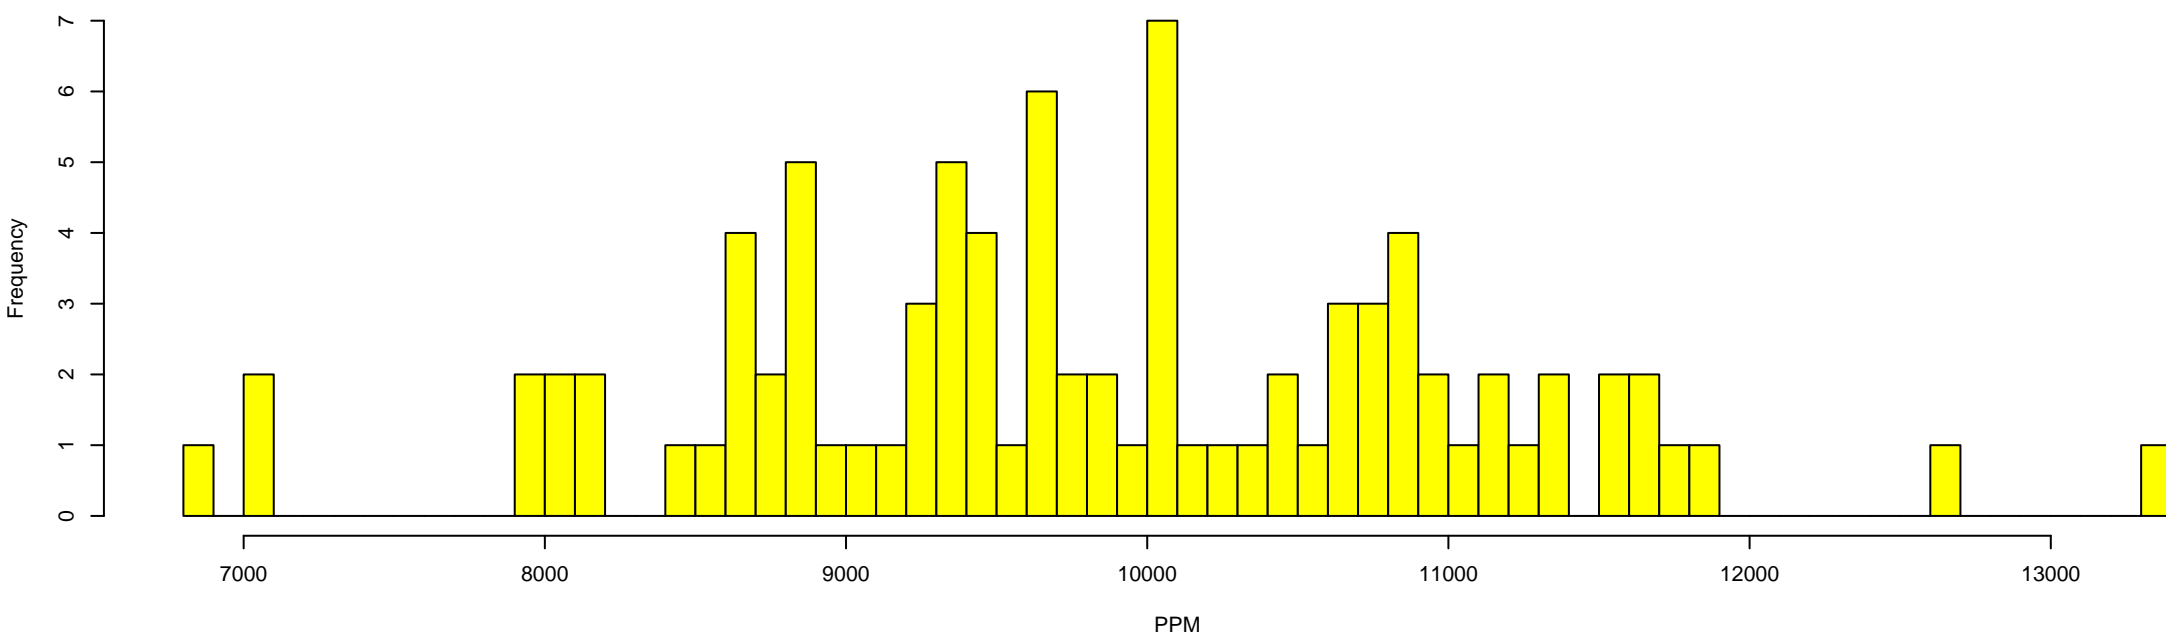

2nd Soil Shoot S

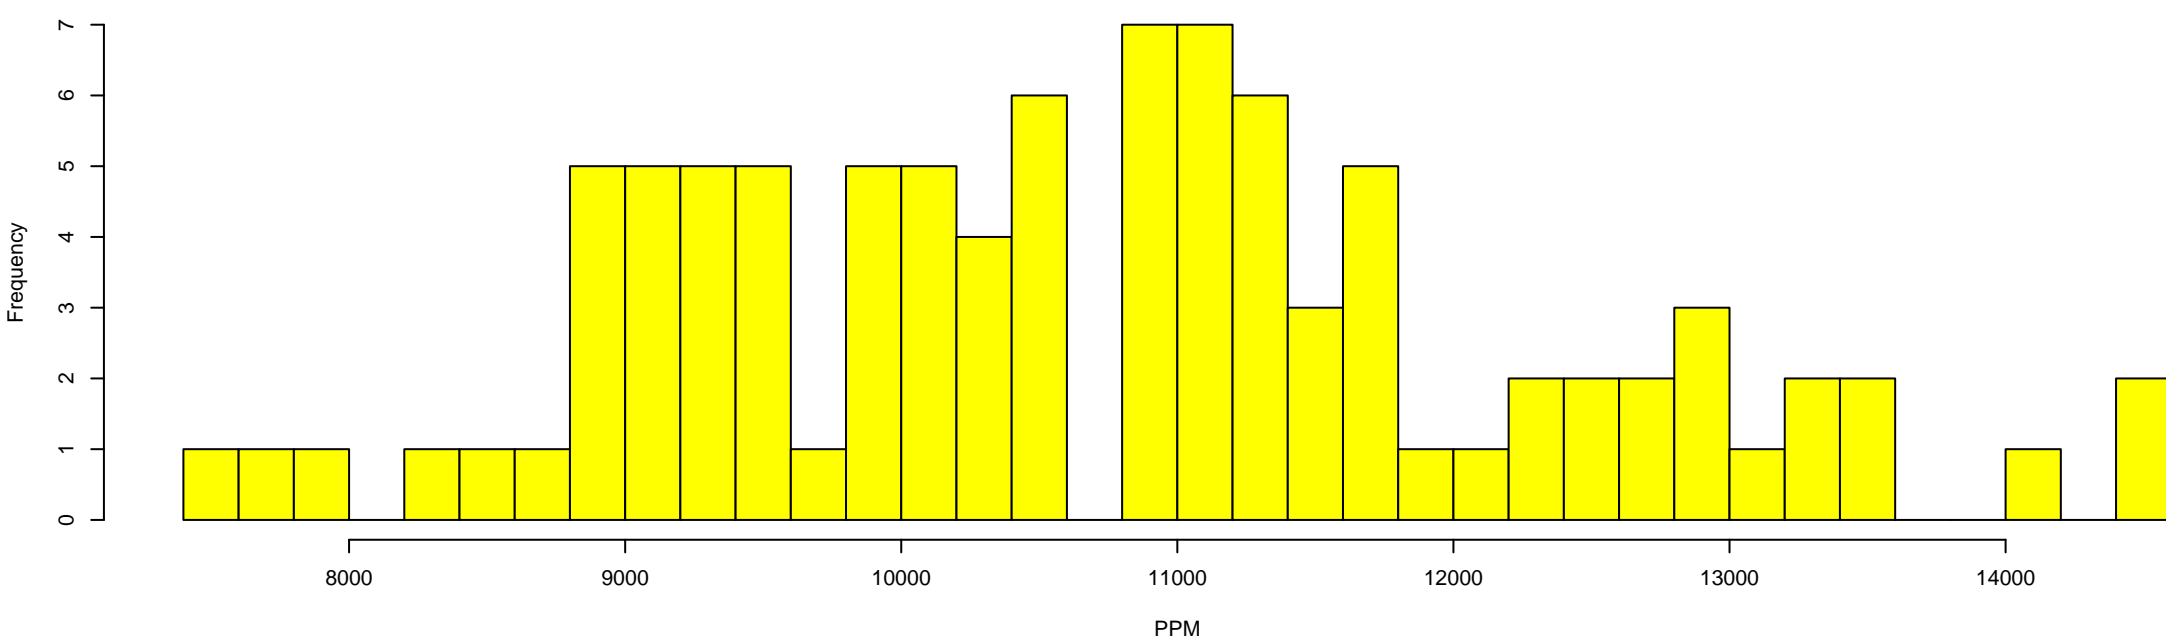

1st Soil Shoot S

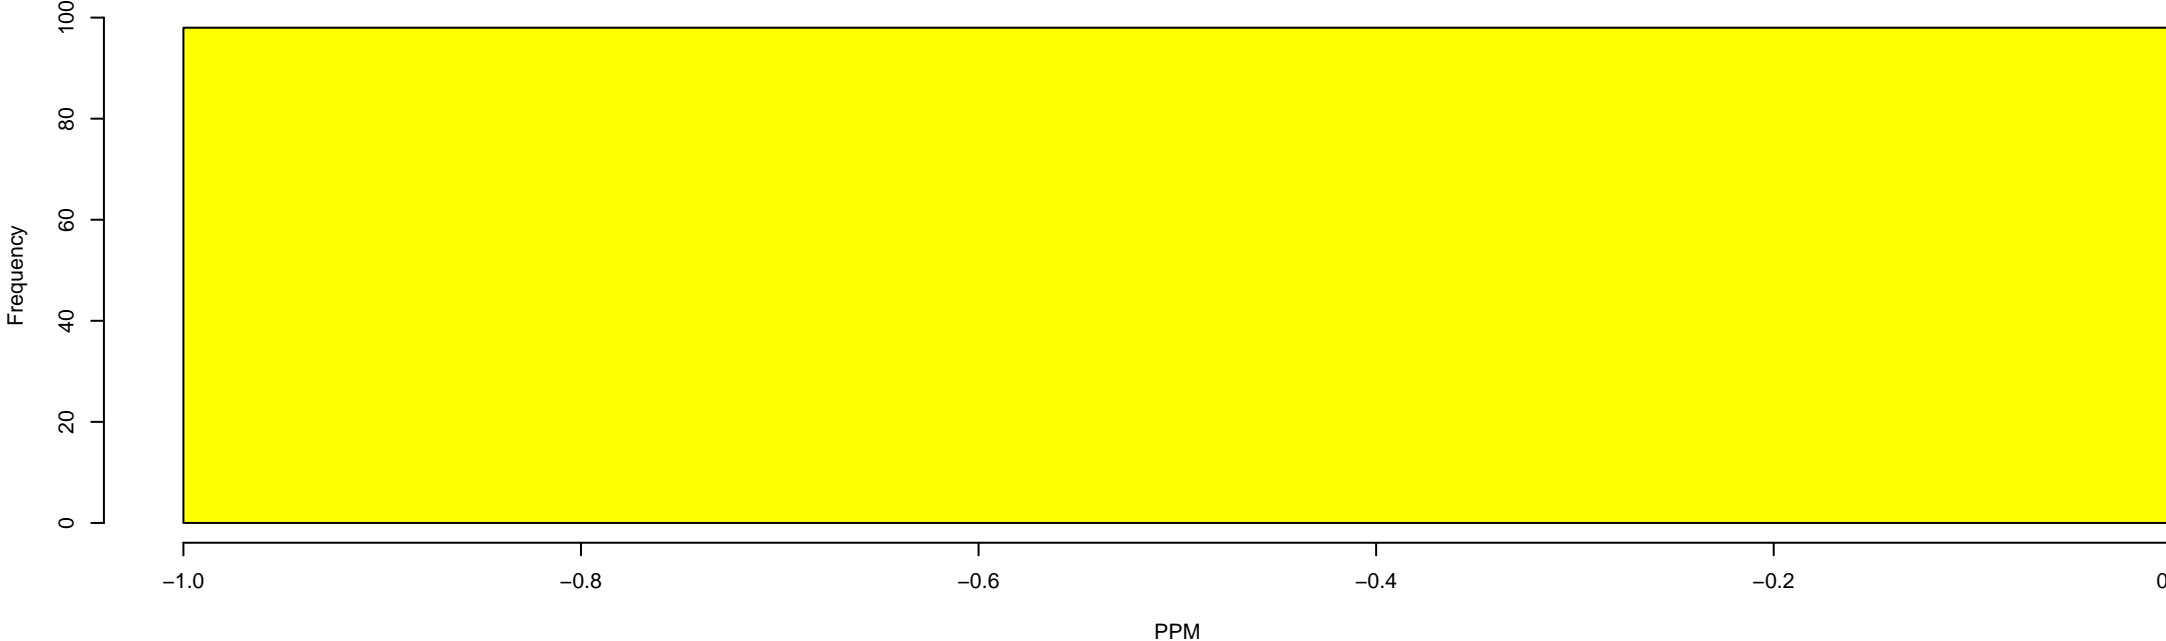

Seed S

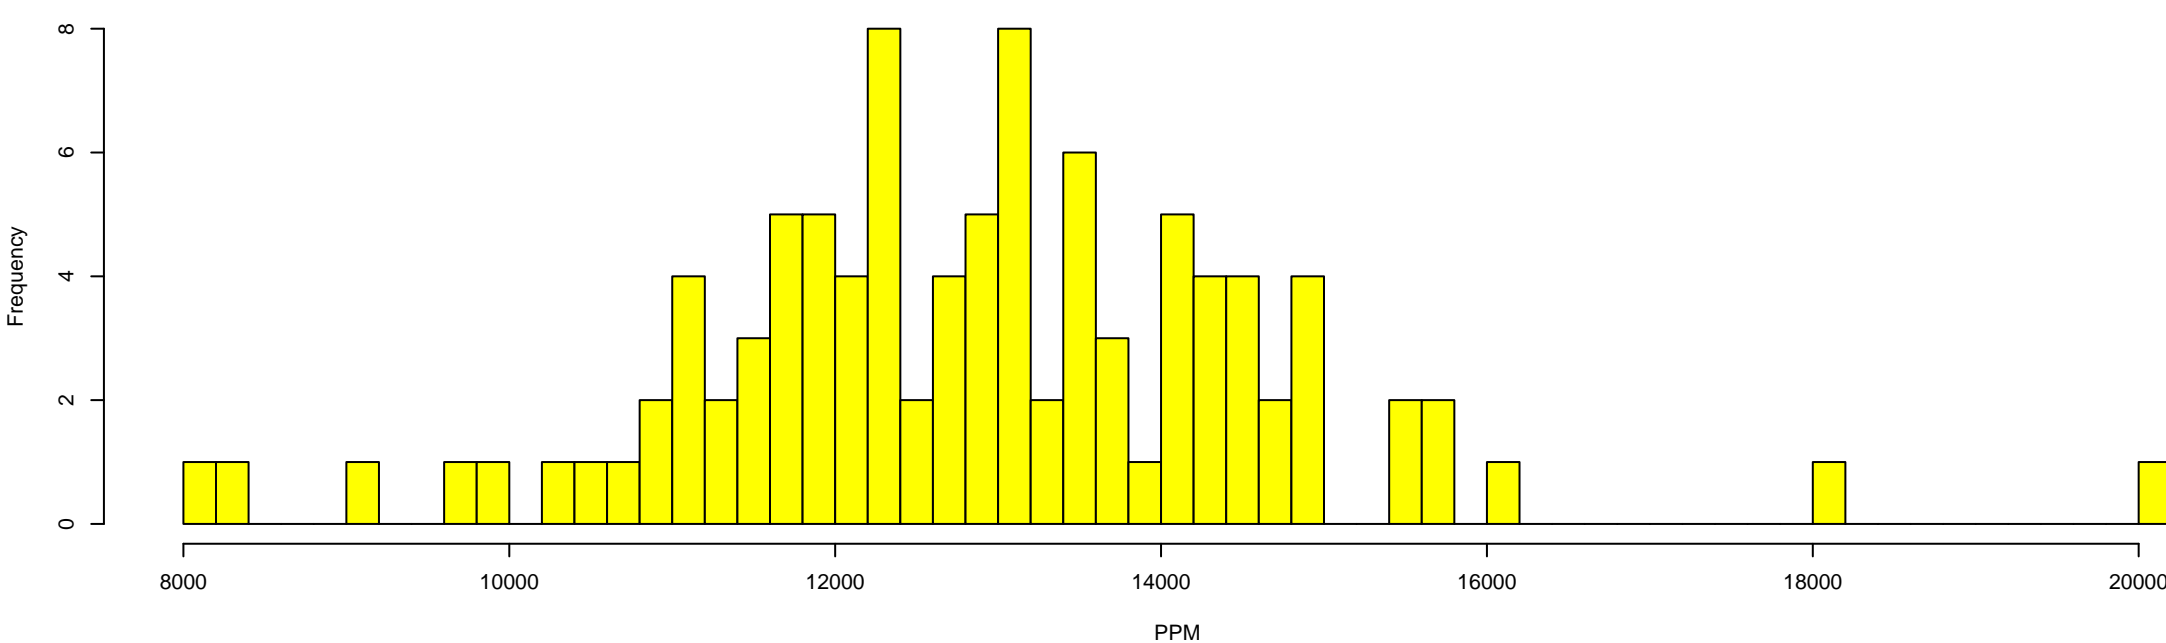

Hydro Root K

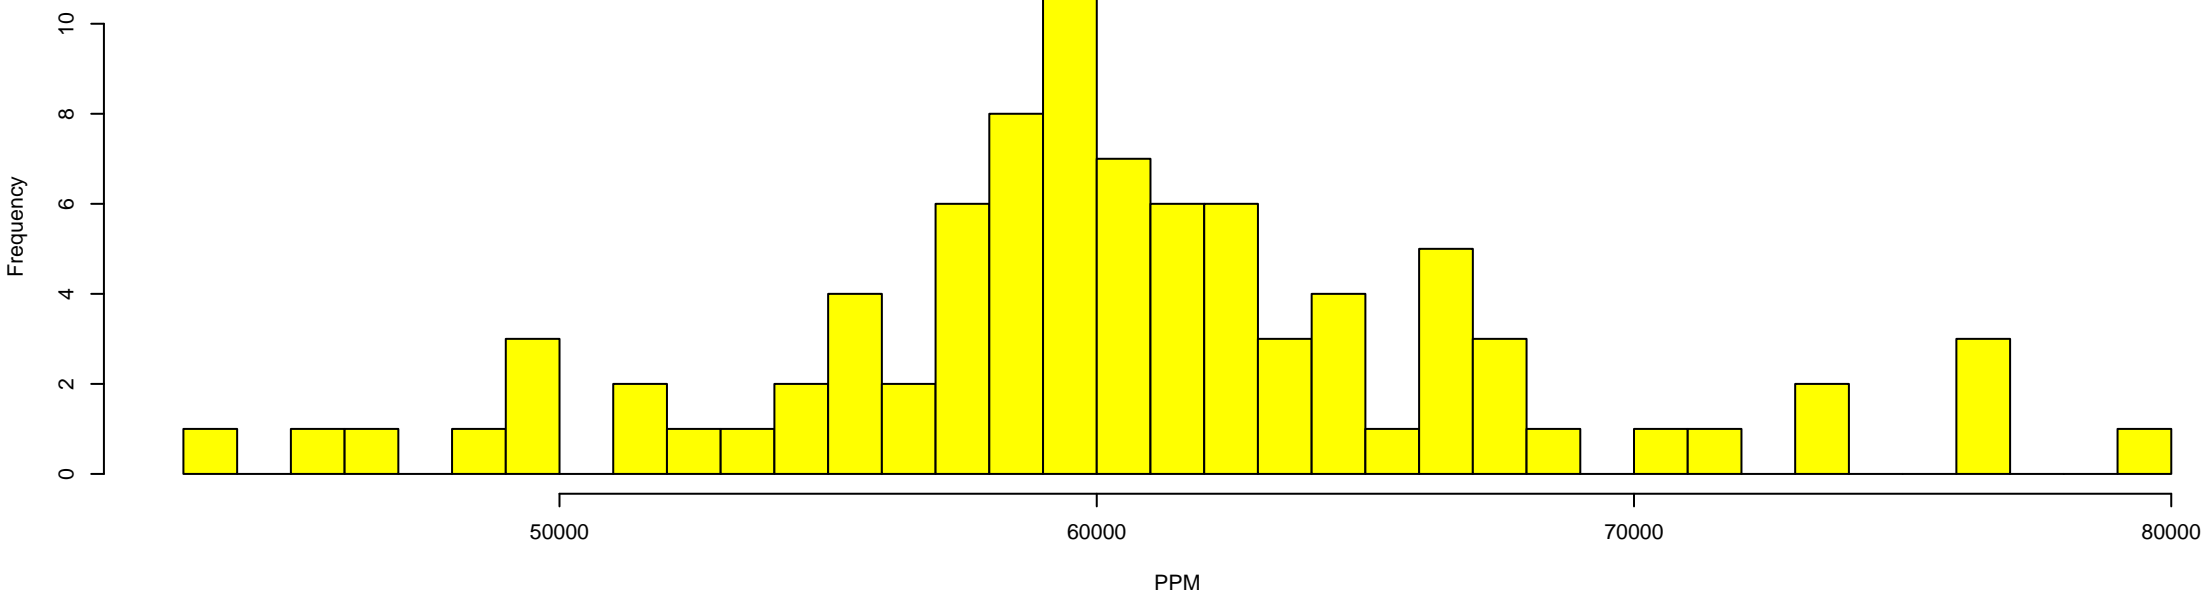

Hydro Shoot K

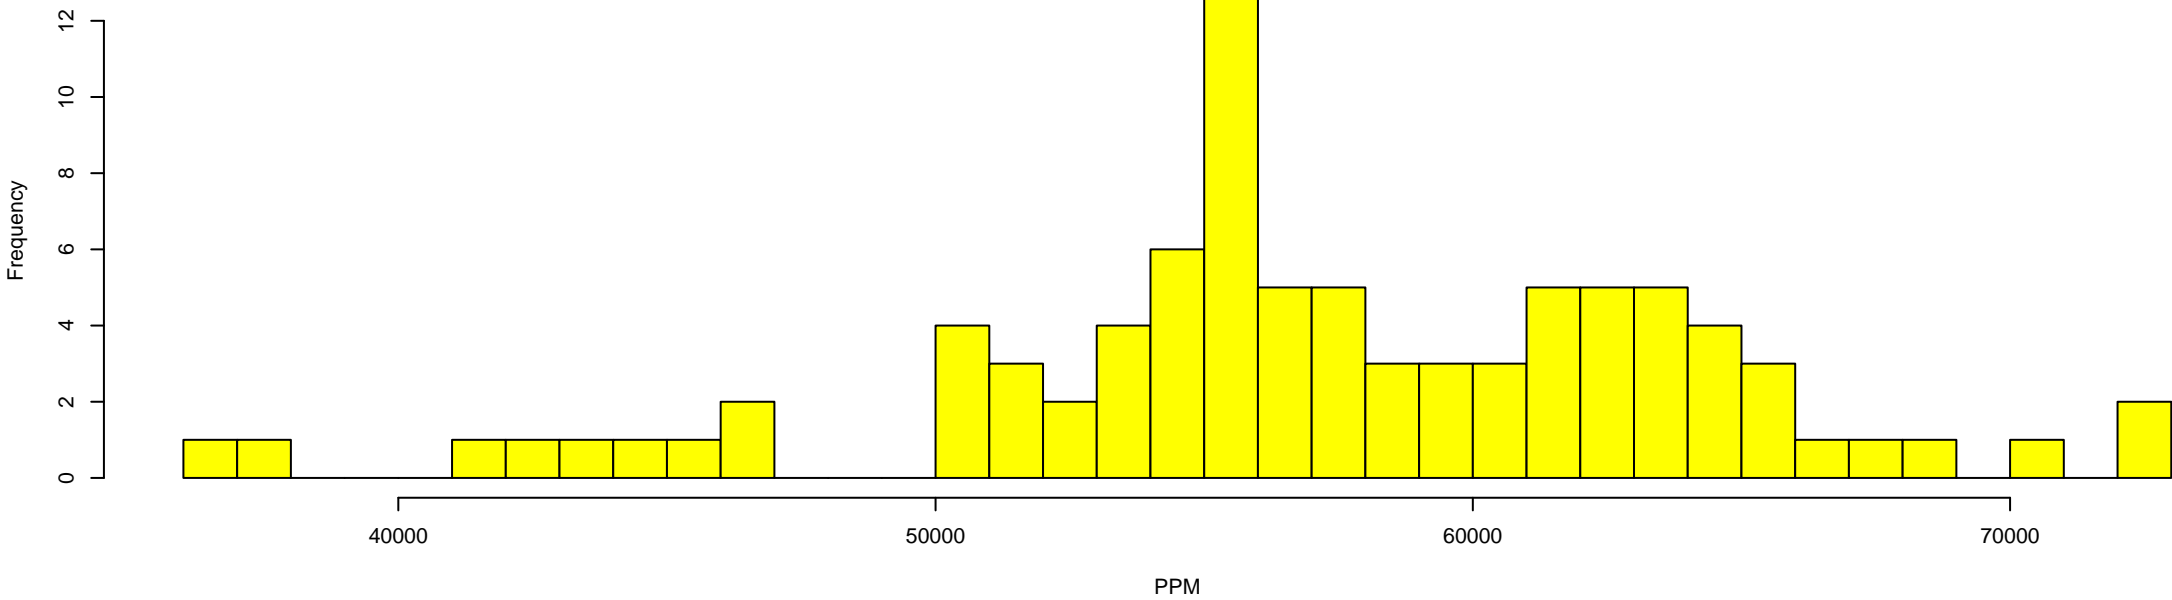

2nd Soil Shoot K

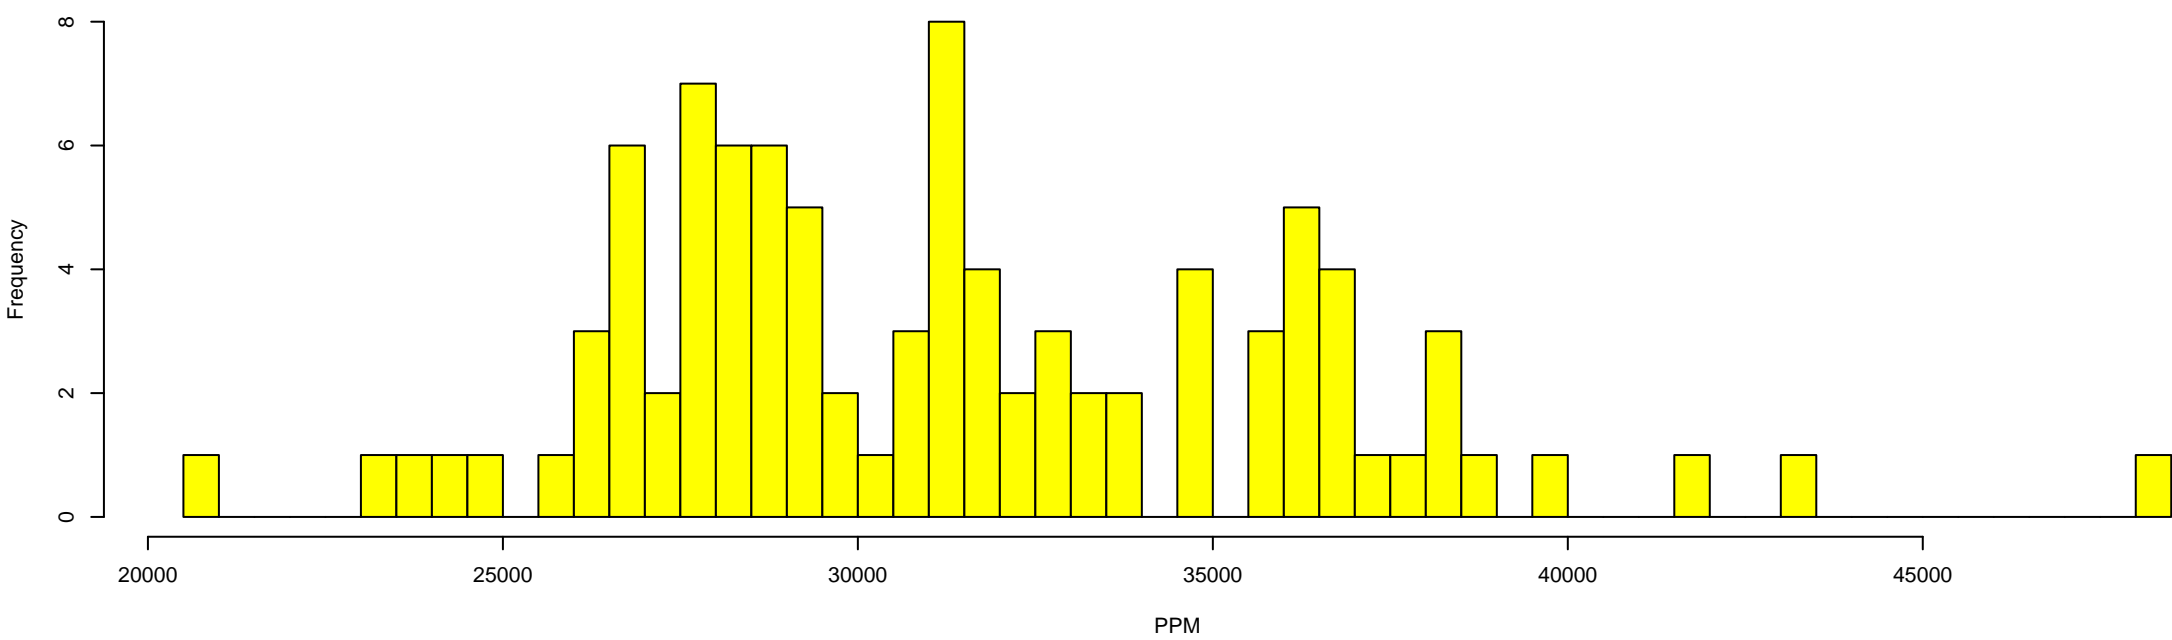

1st Soil Shoot K

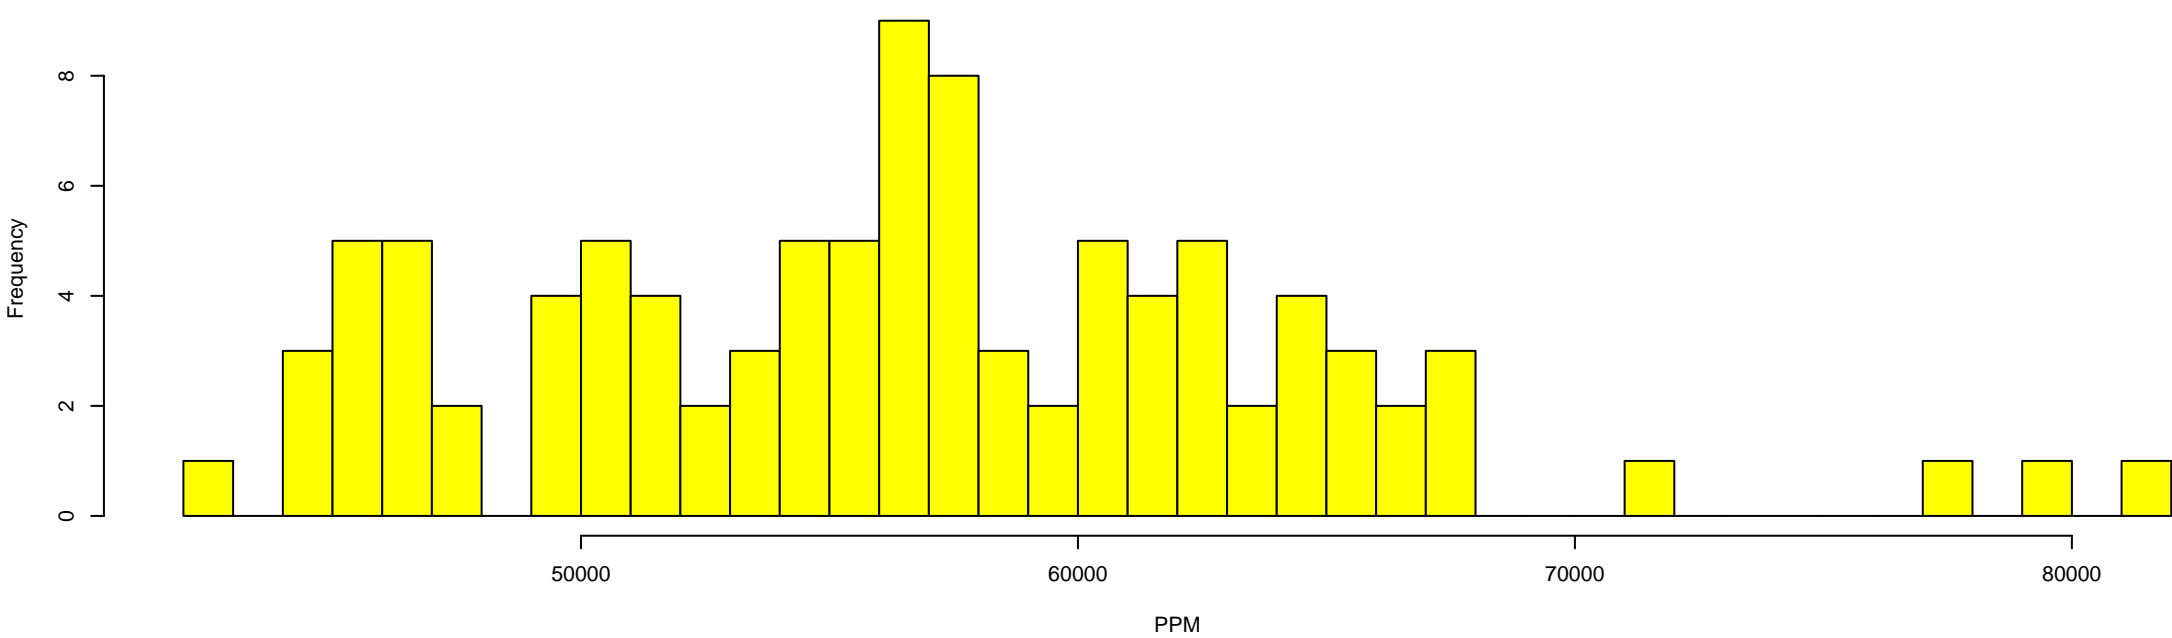

Seed K

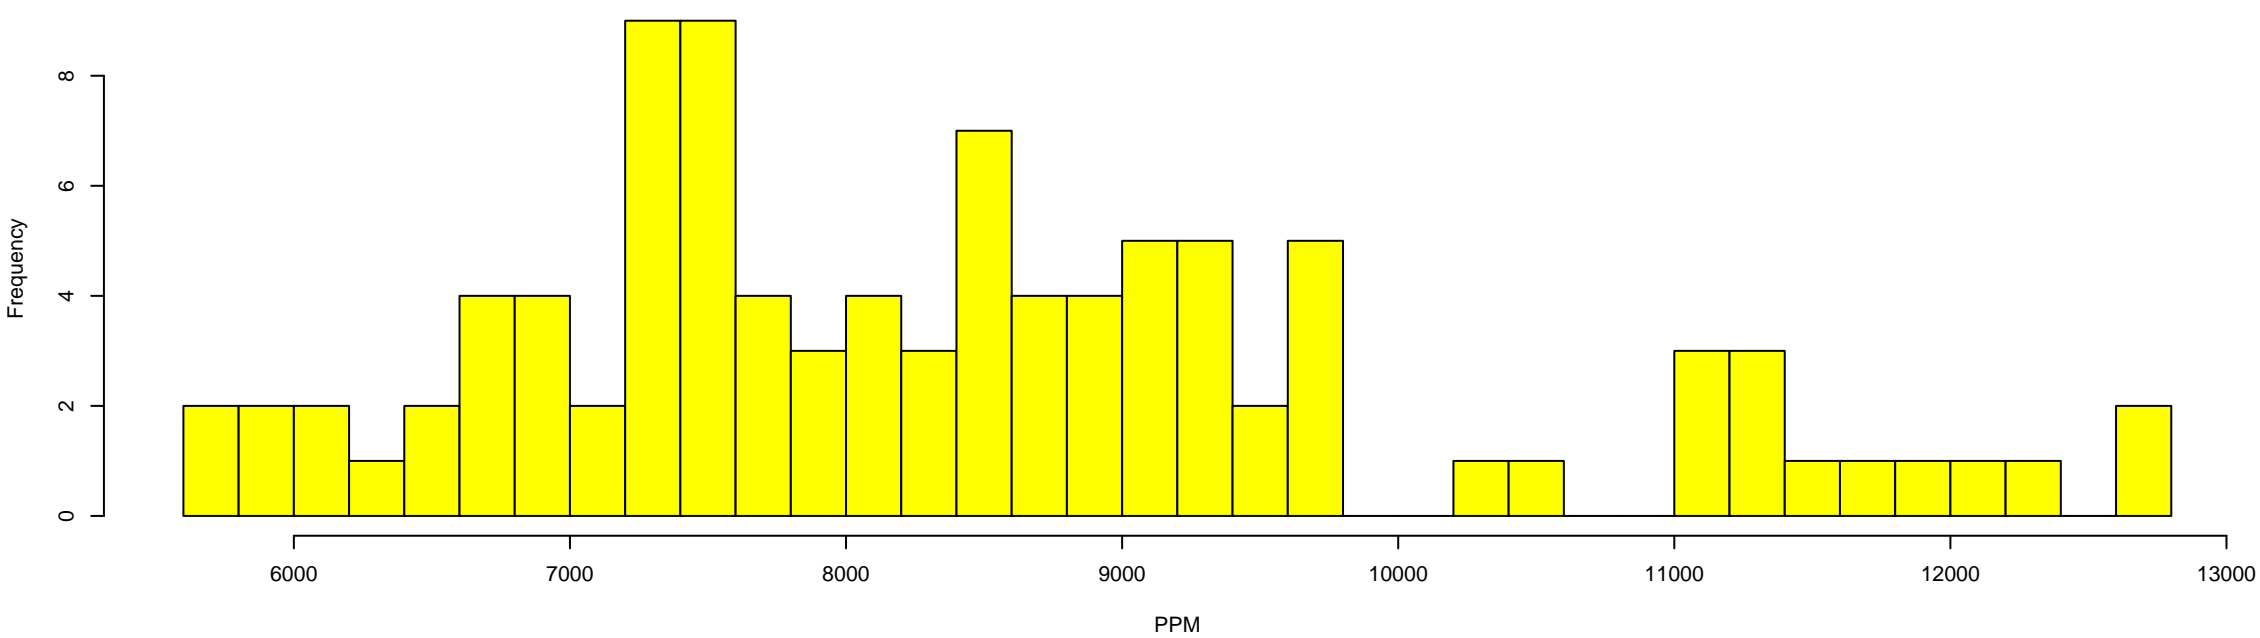

Hydro Root Ca

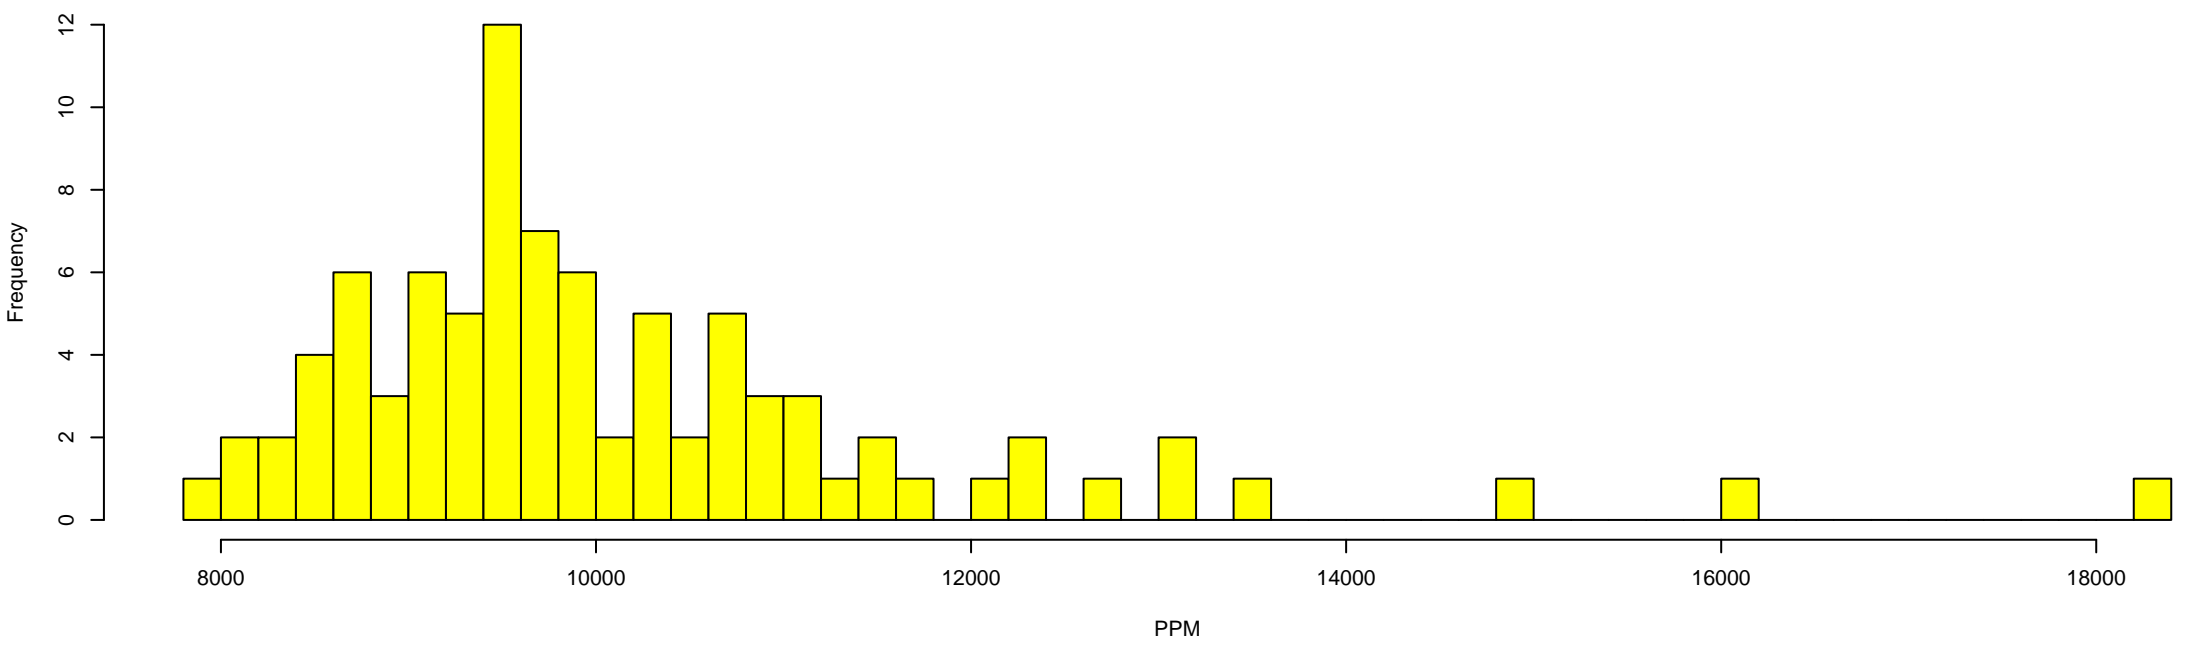

Hydro Shoot Ca

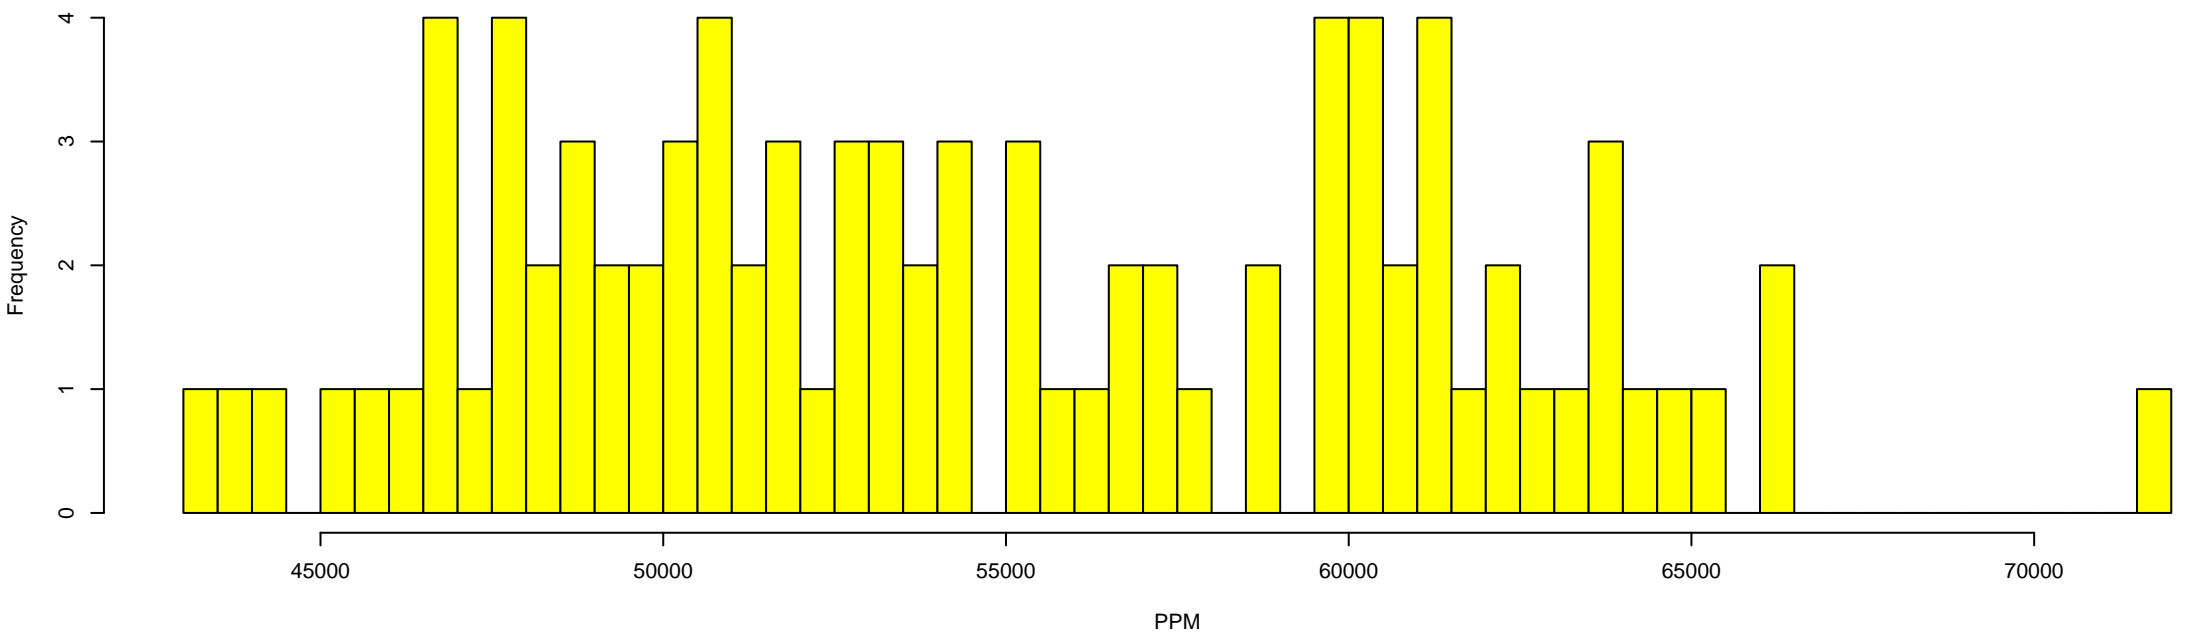

2nd Soil Shoot Ca

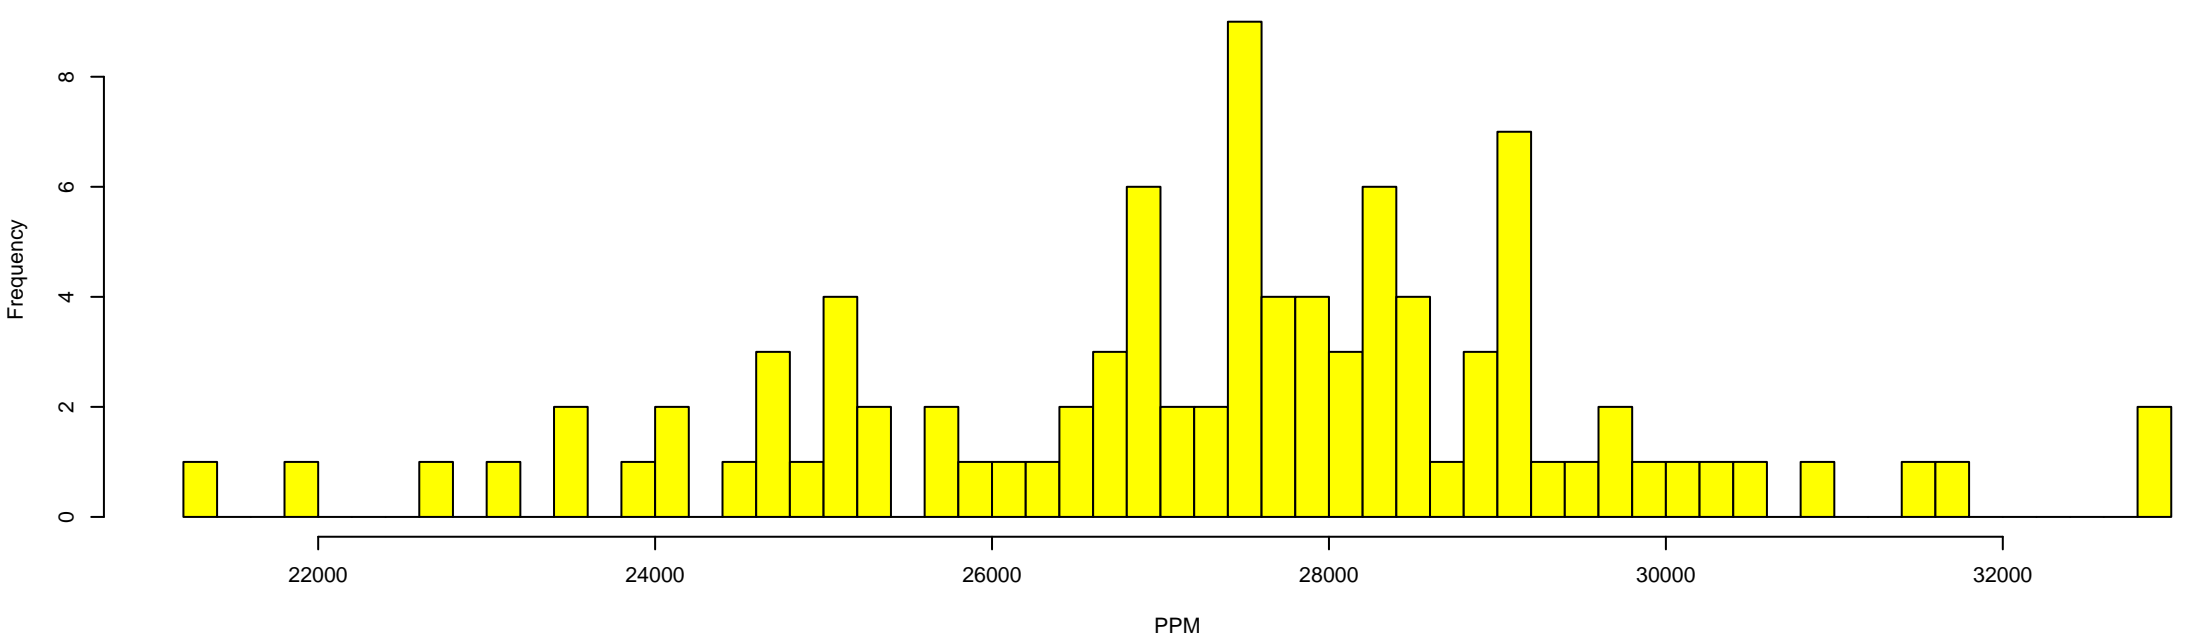

1st Soil Shoot Ca

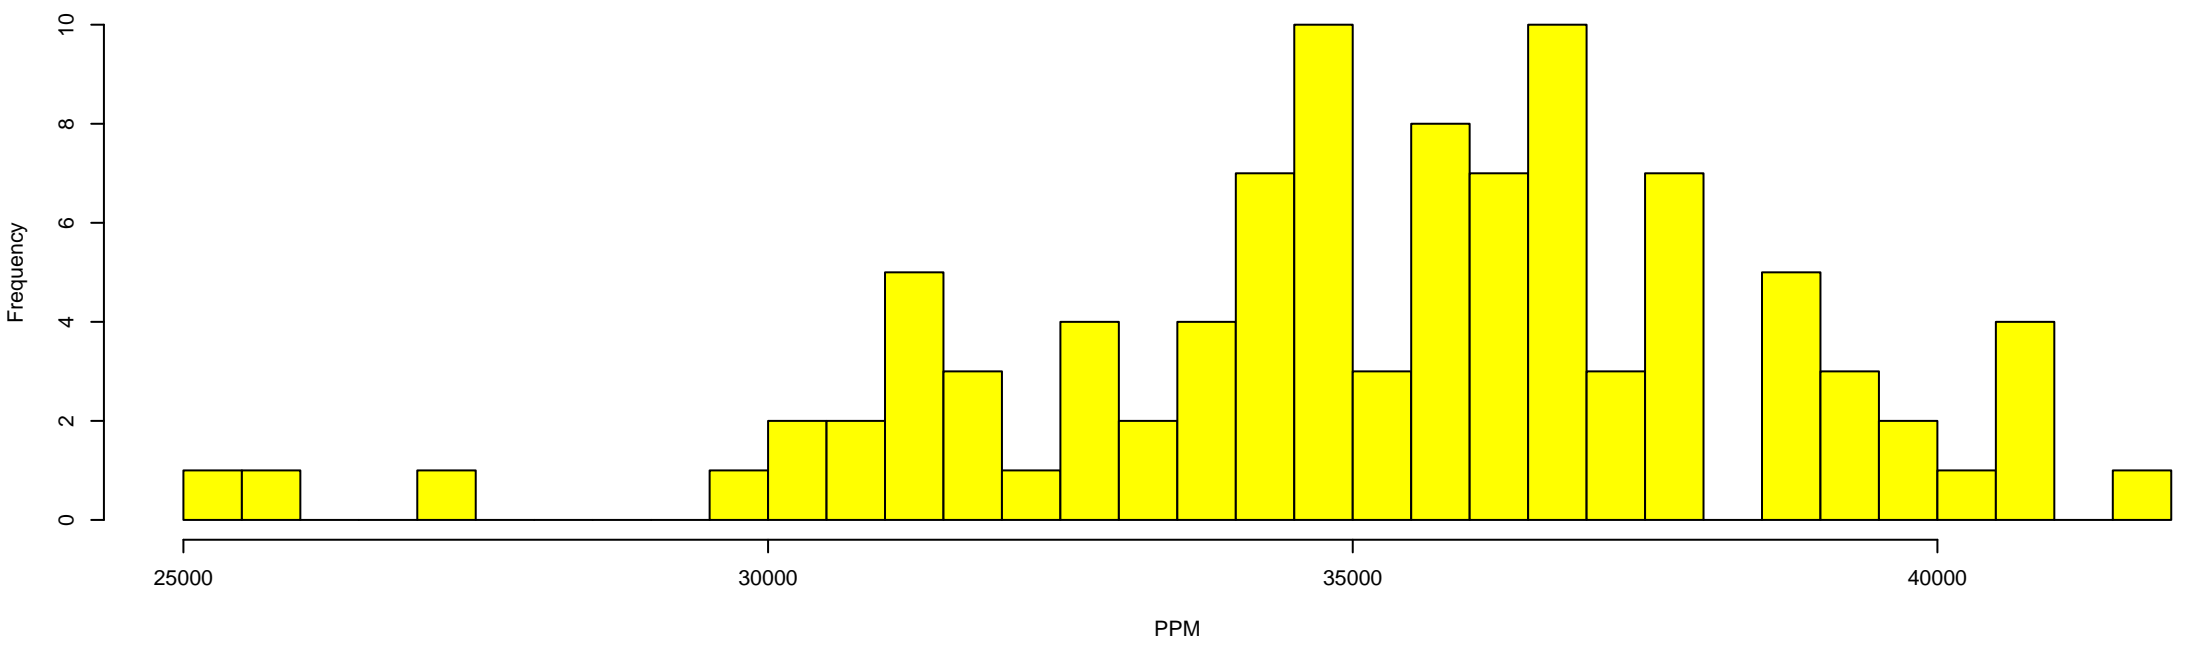

Seed Ca

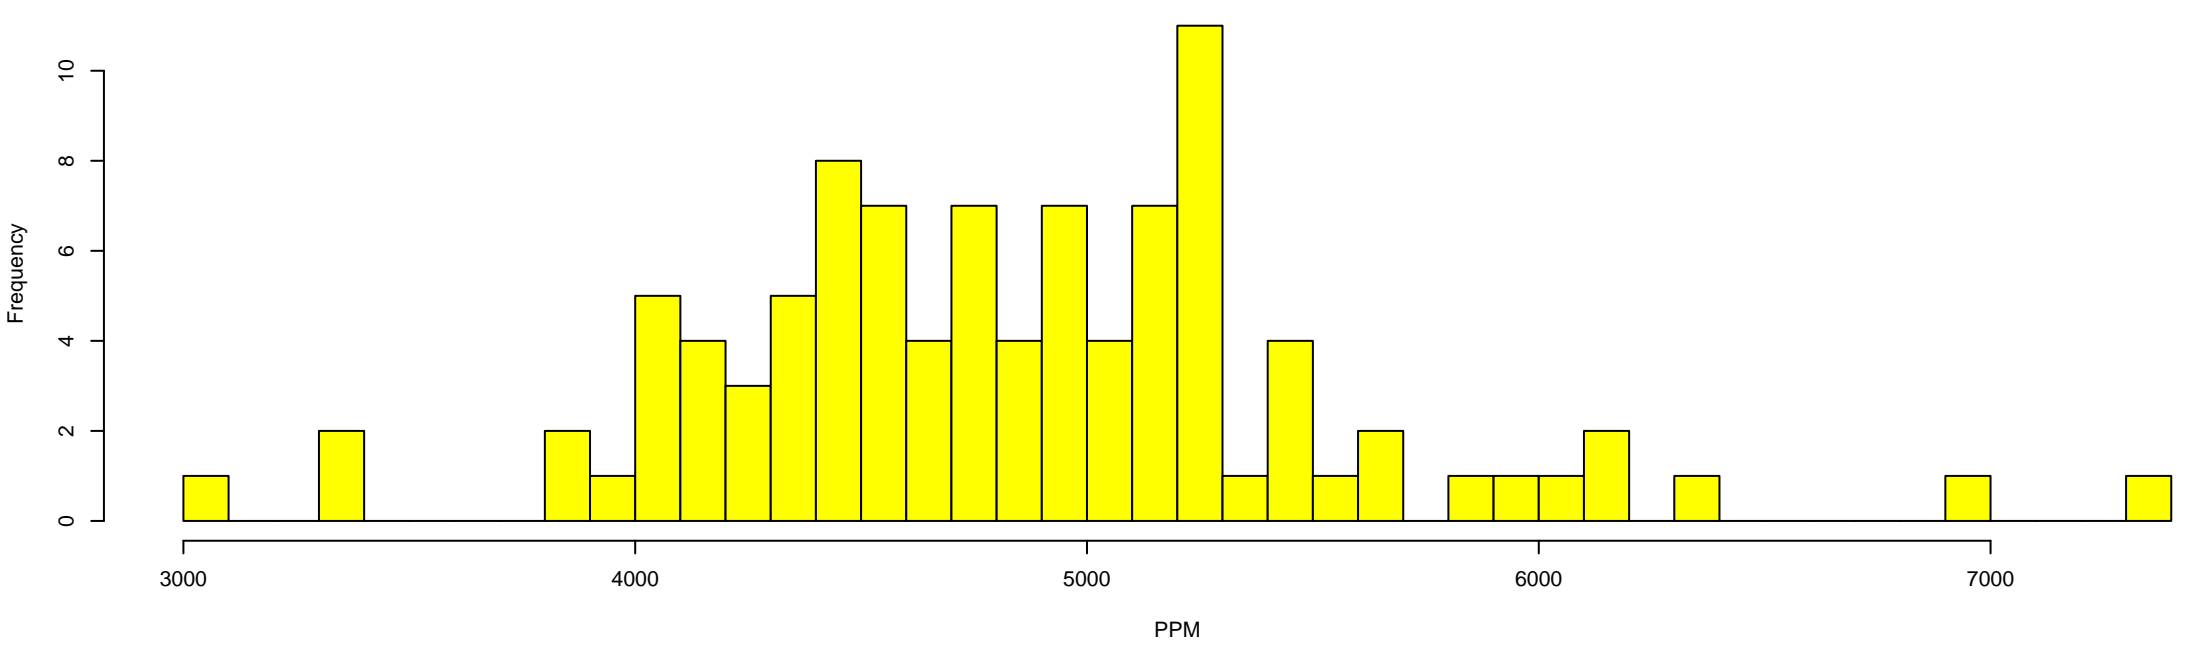



Hydro Root Mn

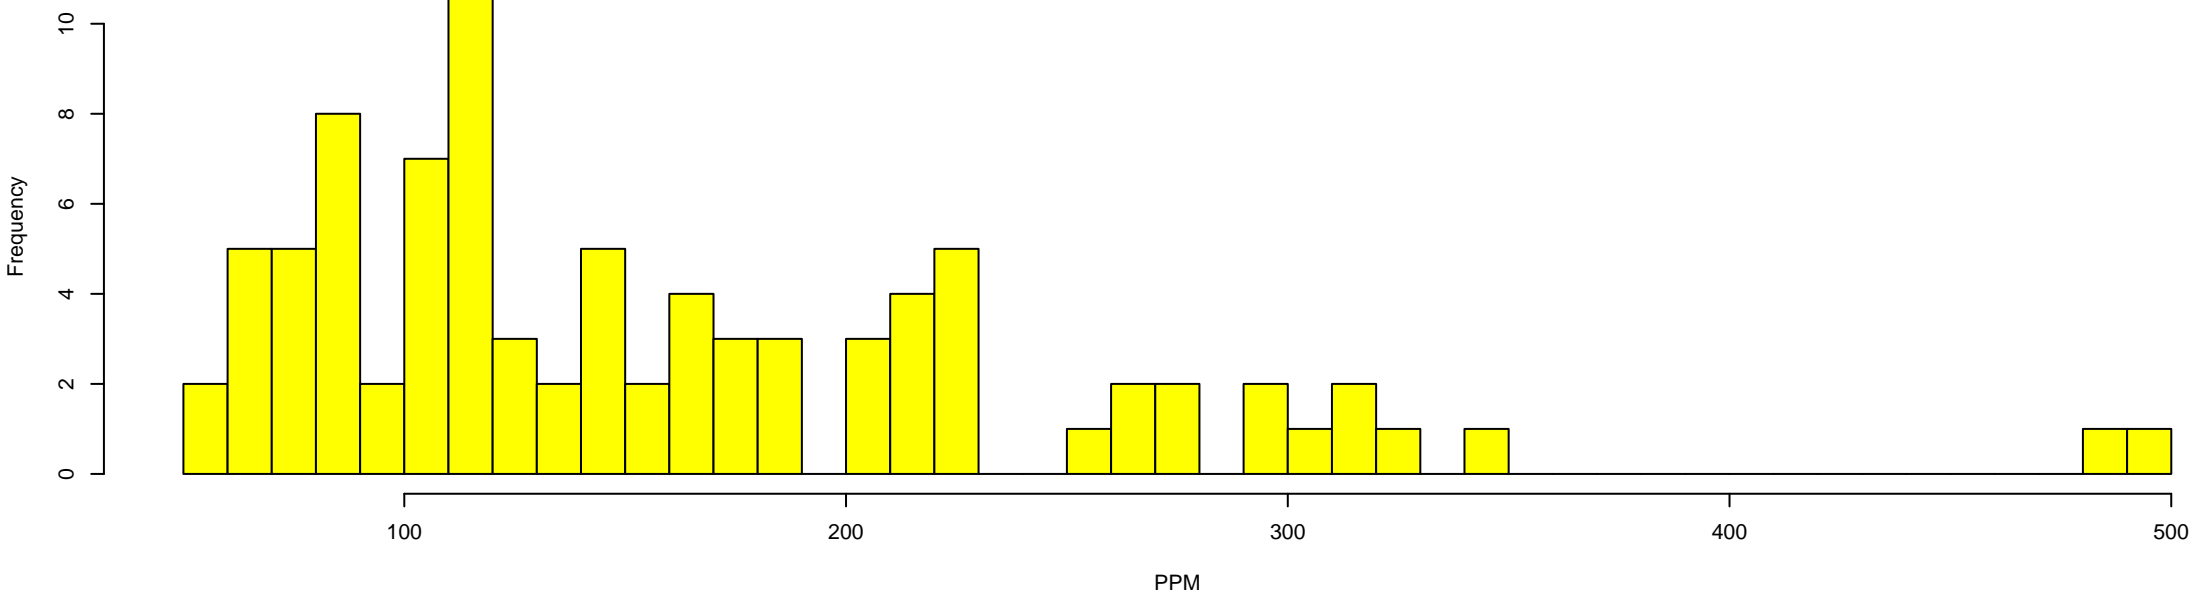

Hydro Shoot Mn

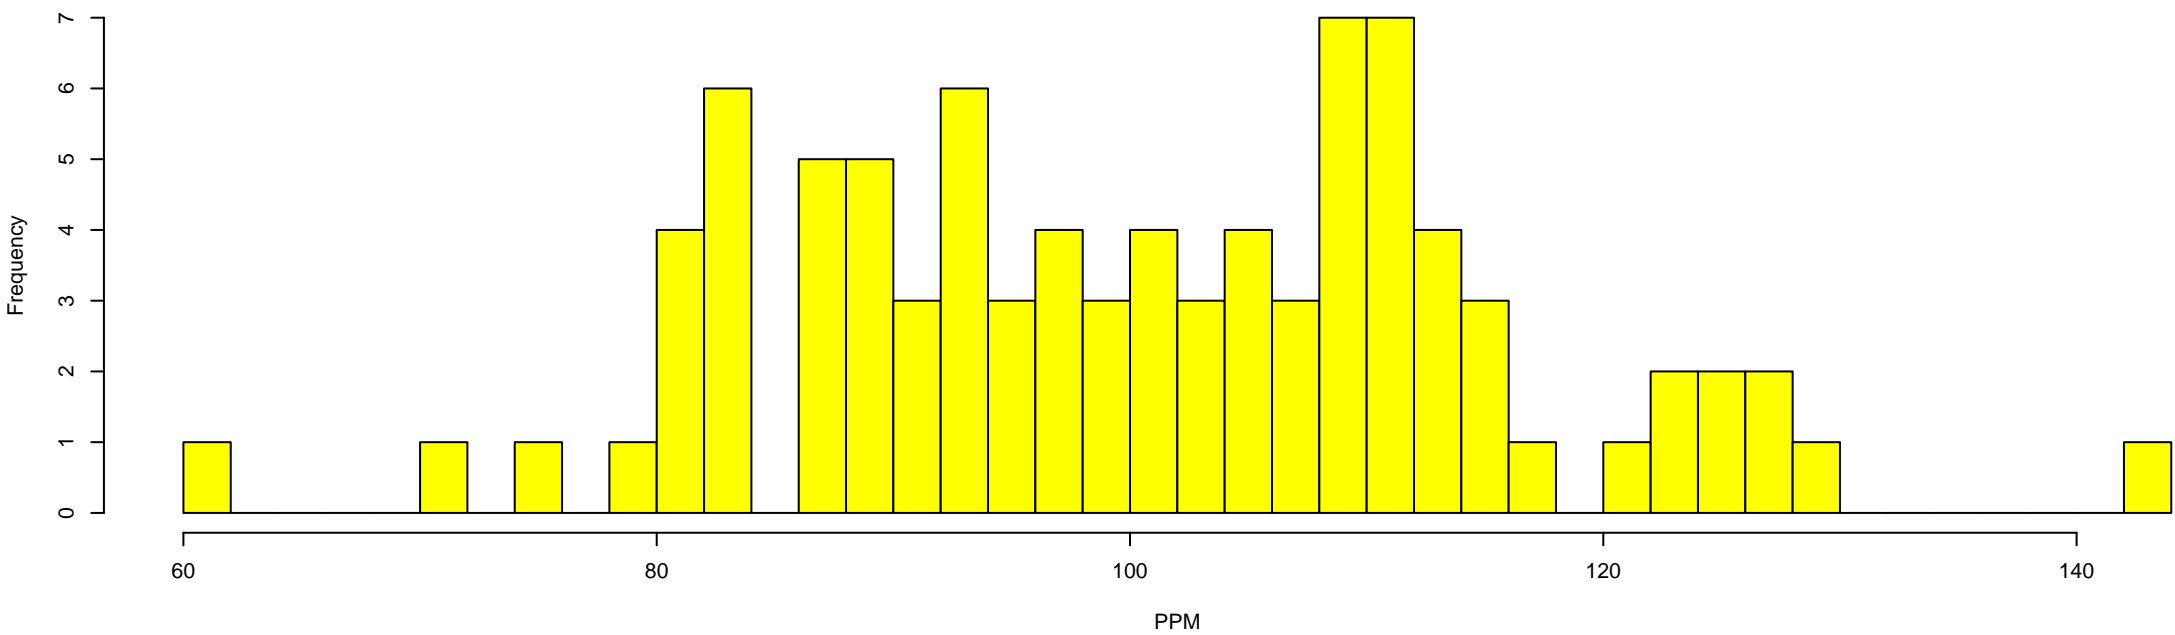

2nd Soil Shoot Mn

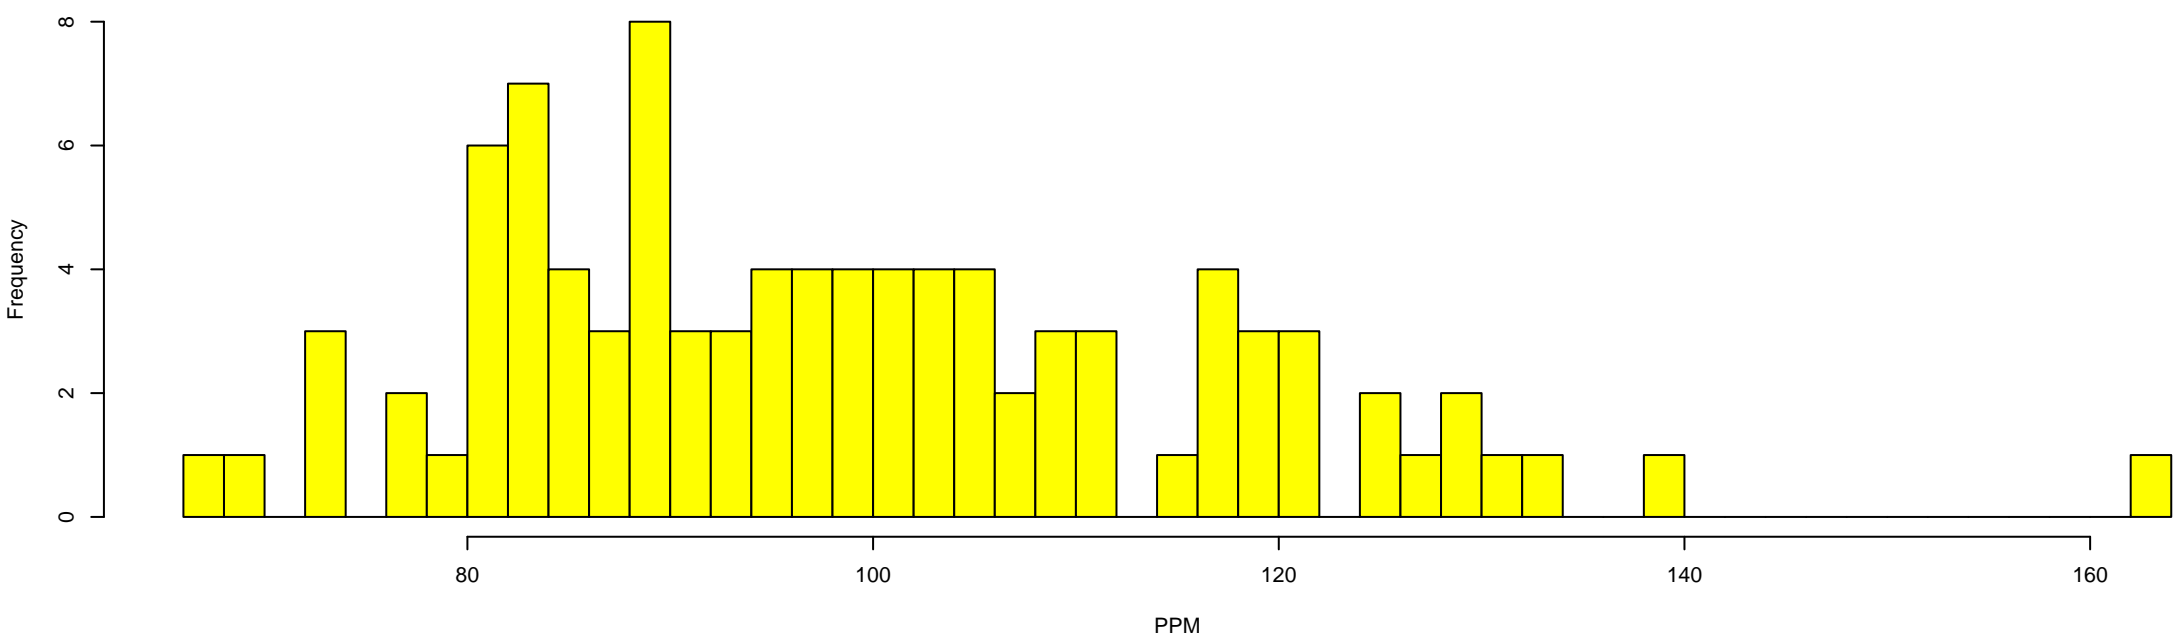

1st Soil Shoot Mn

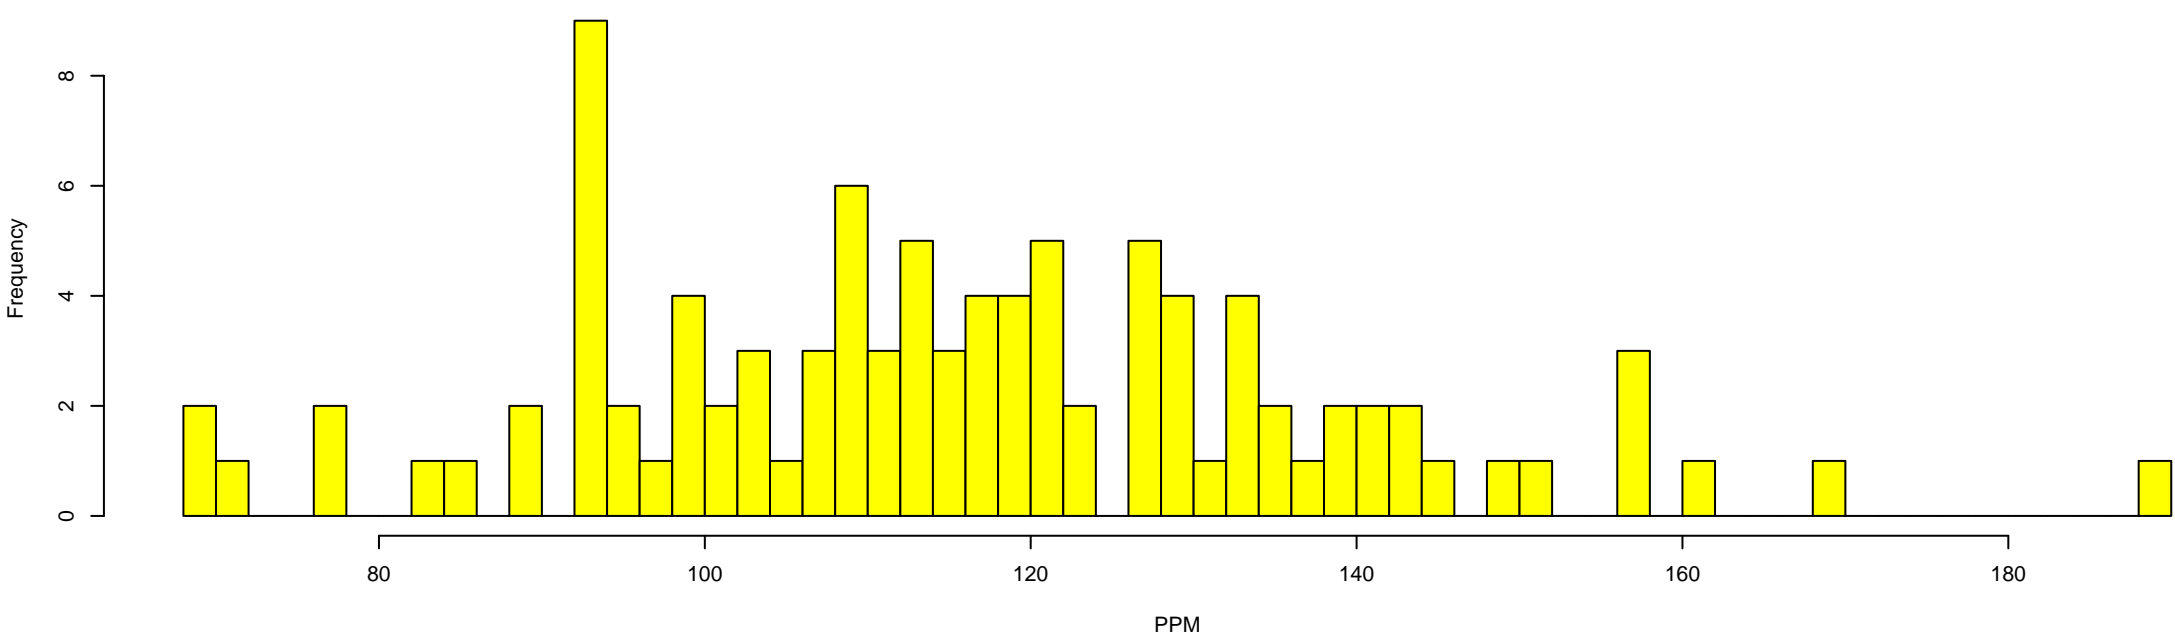

Seed Mn

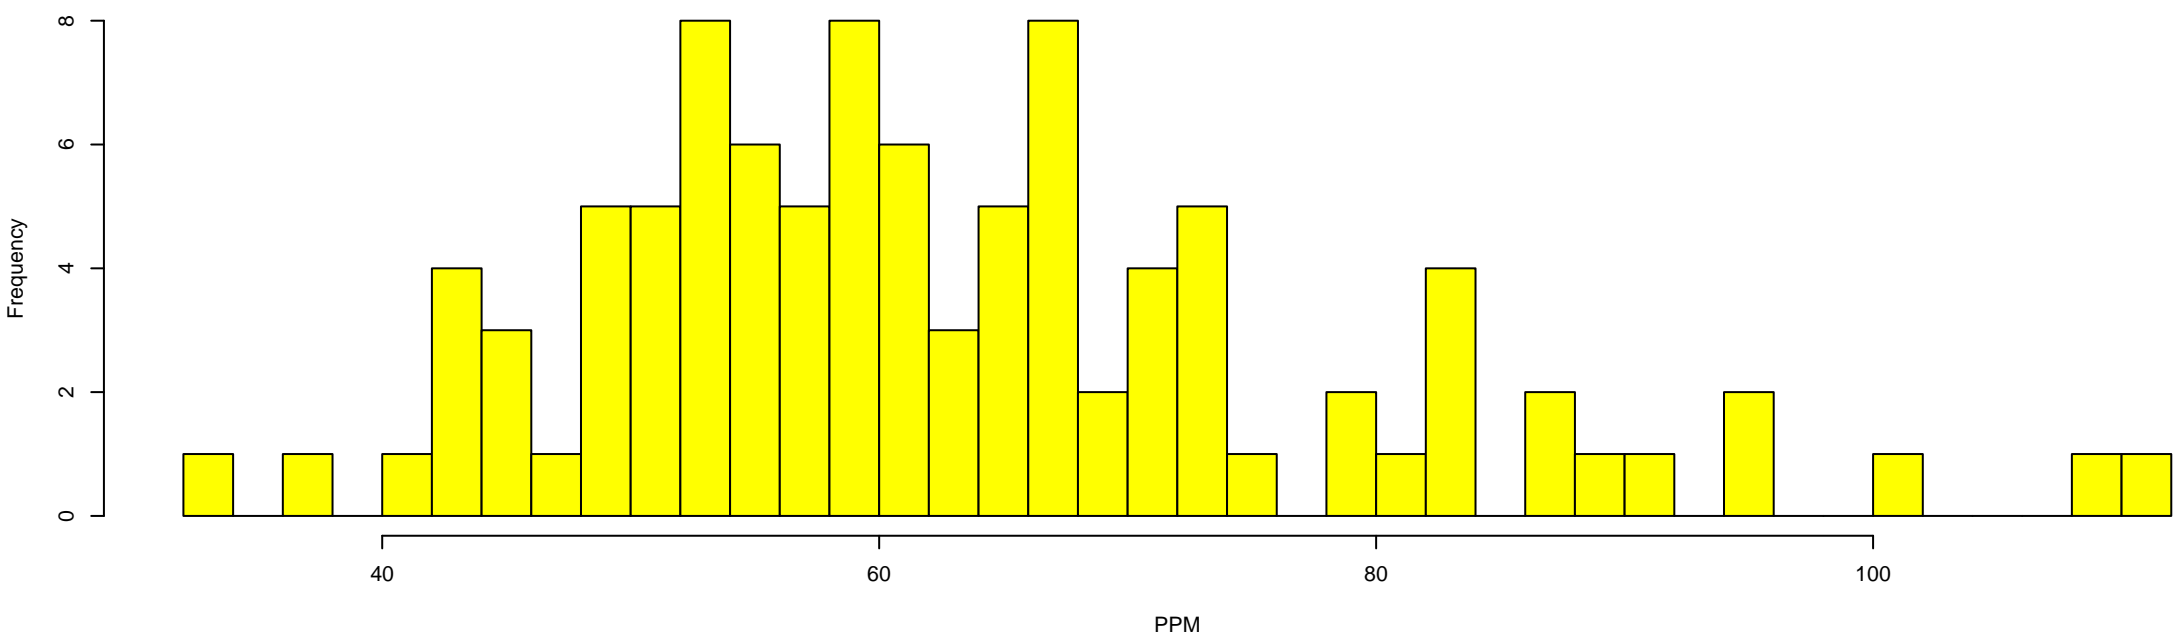

Hydro Root Fe

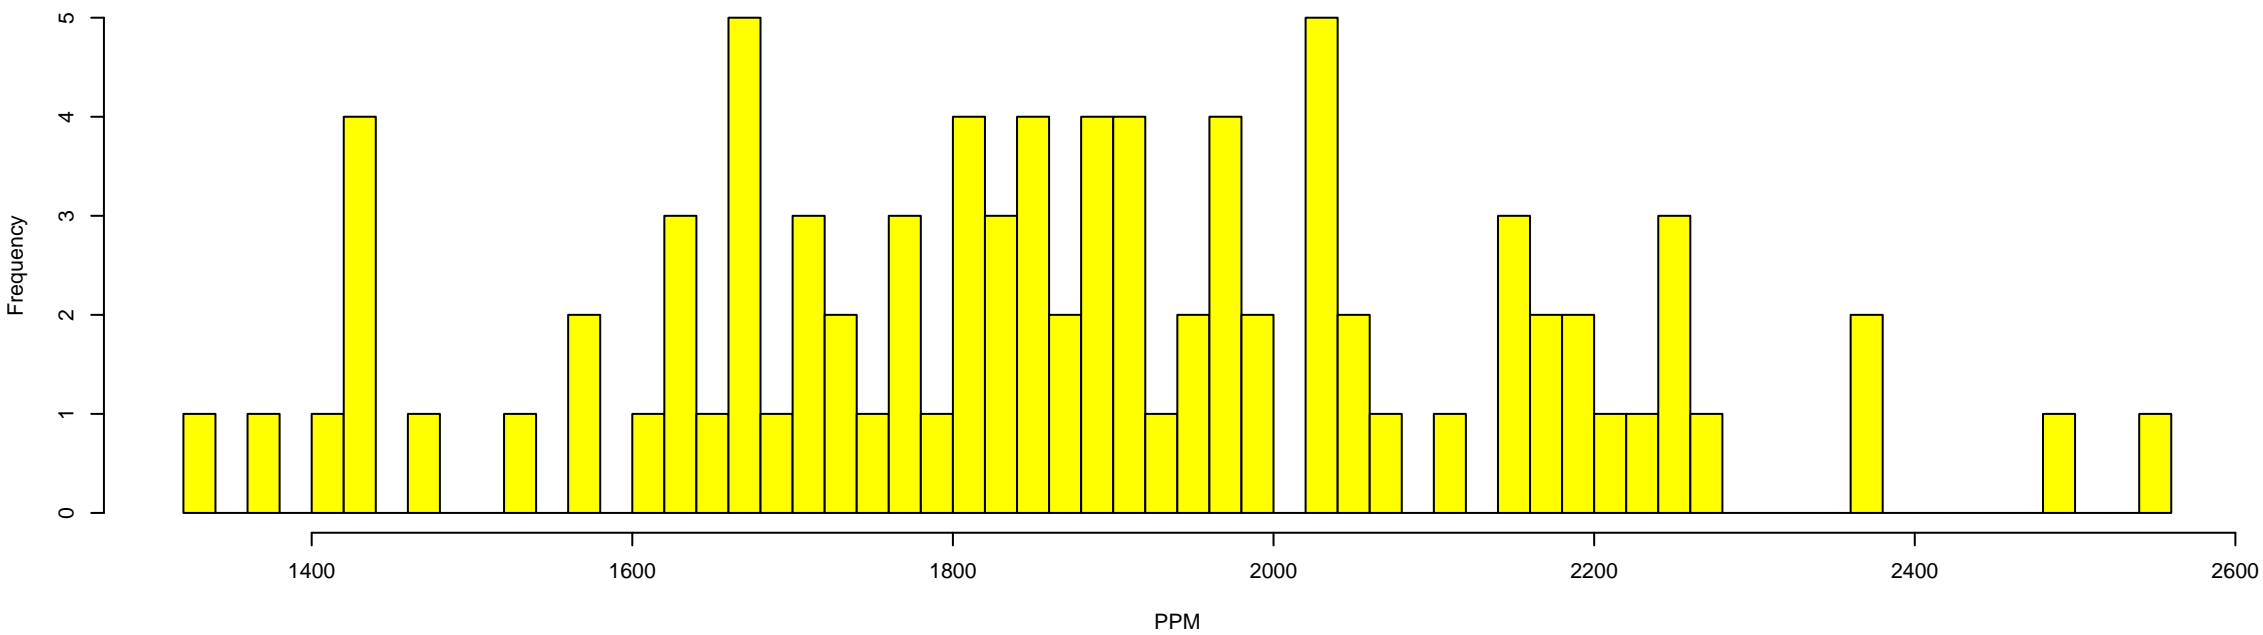

Hydro Shoot Fe

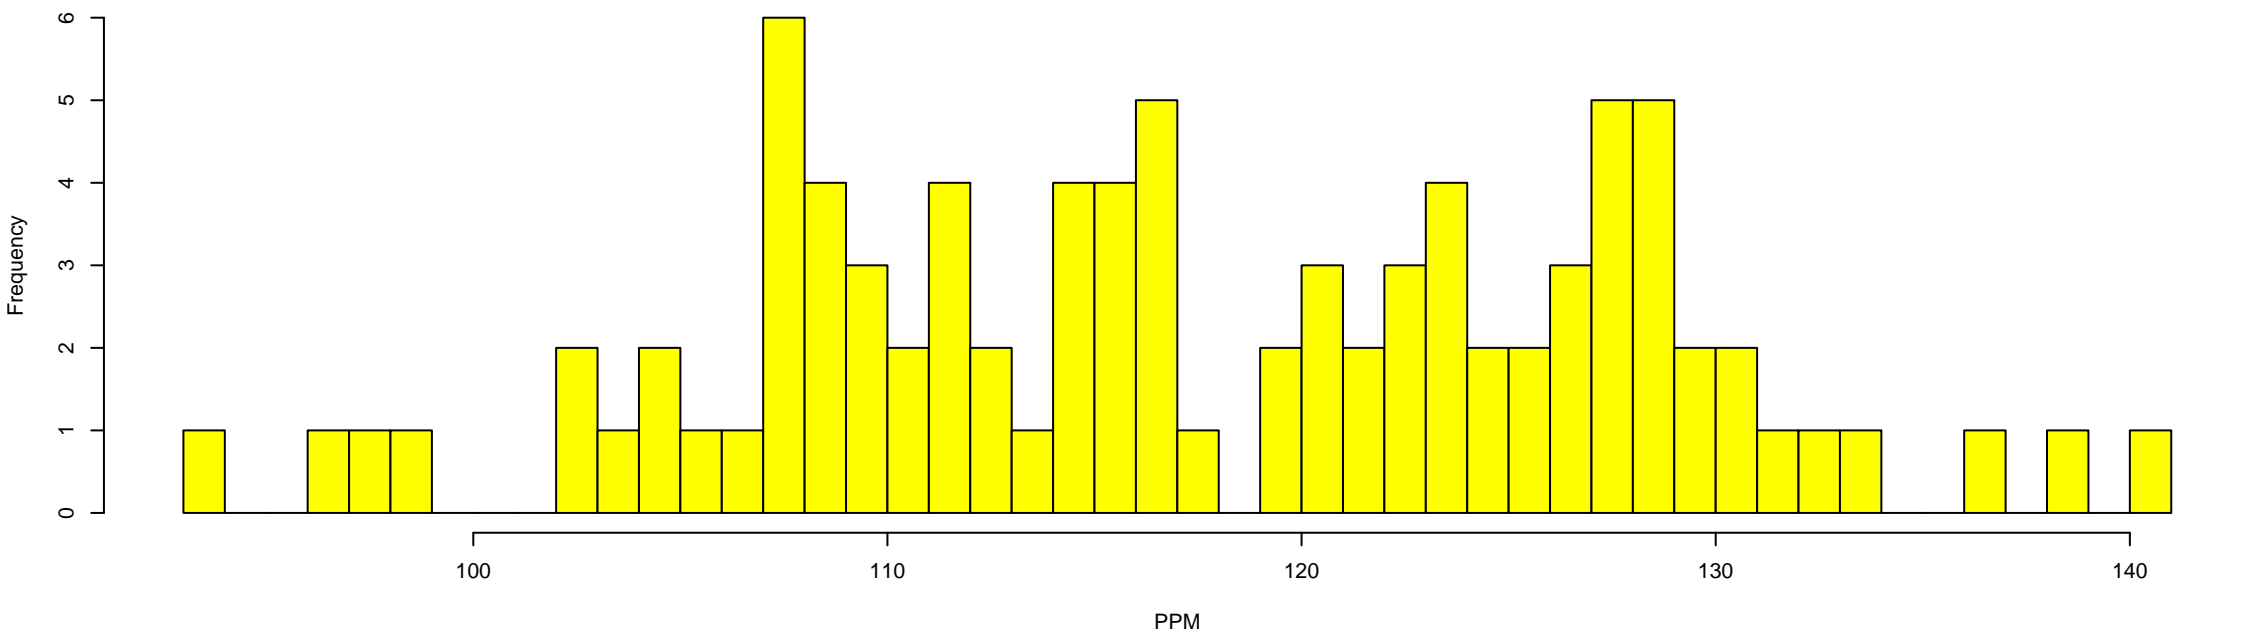

2nd Soil Shoot Fe

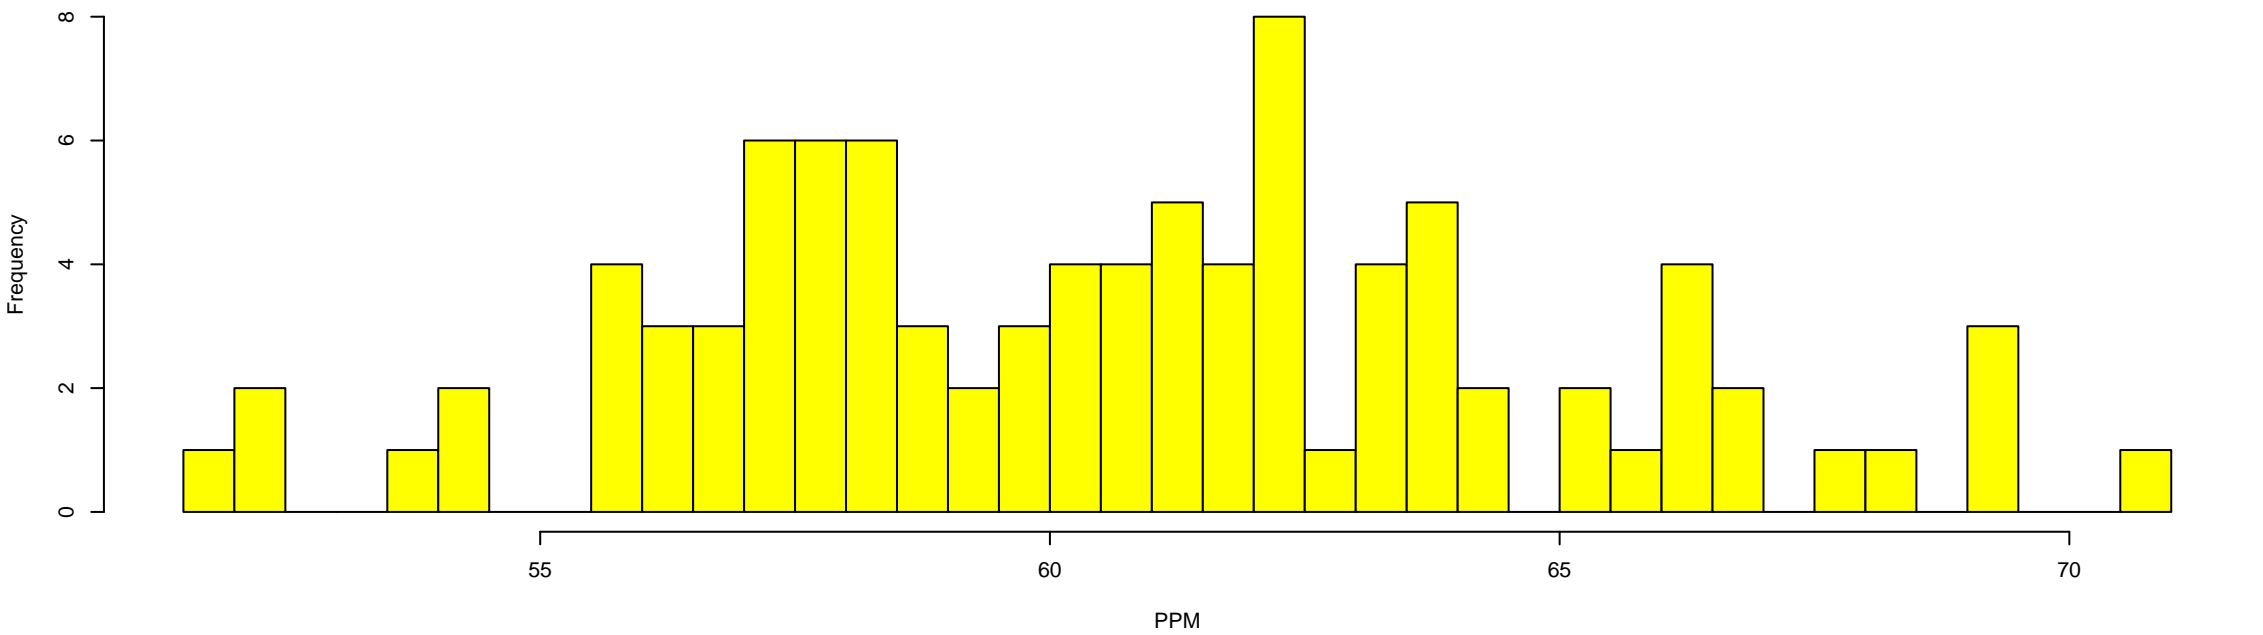

**Hydro Root Co**

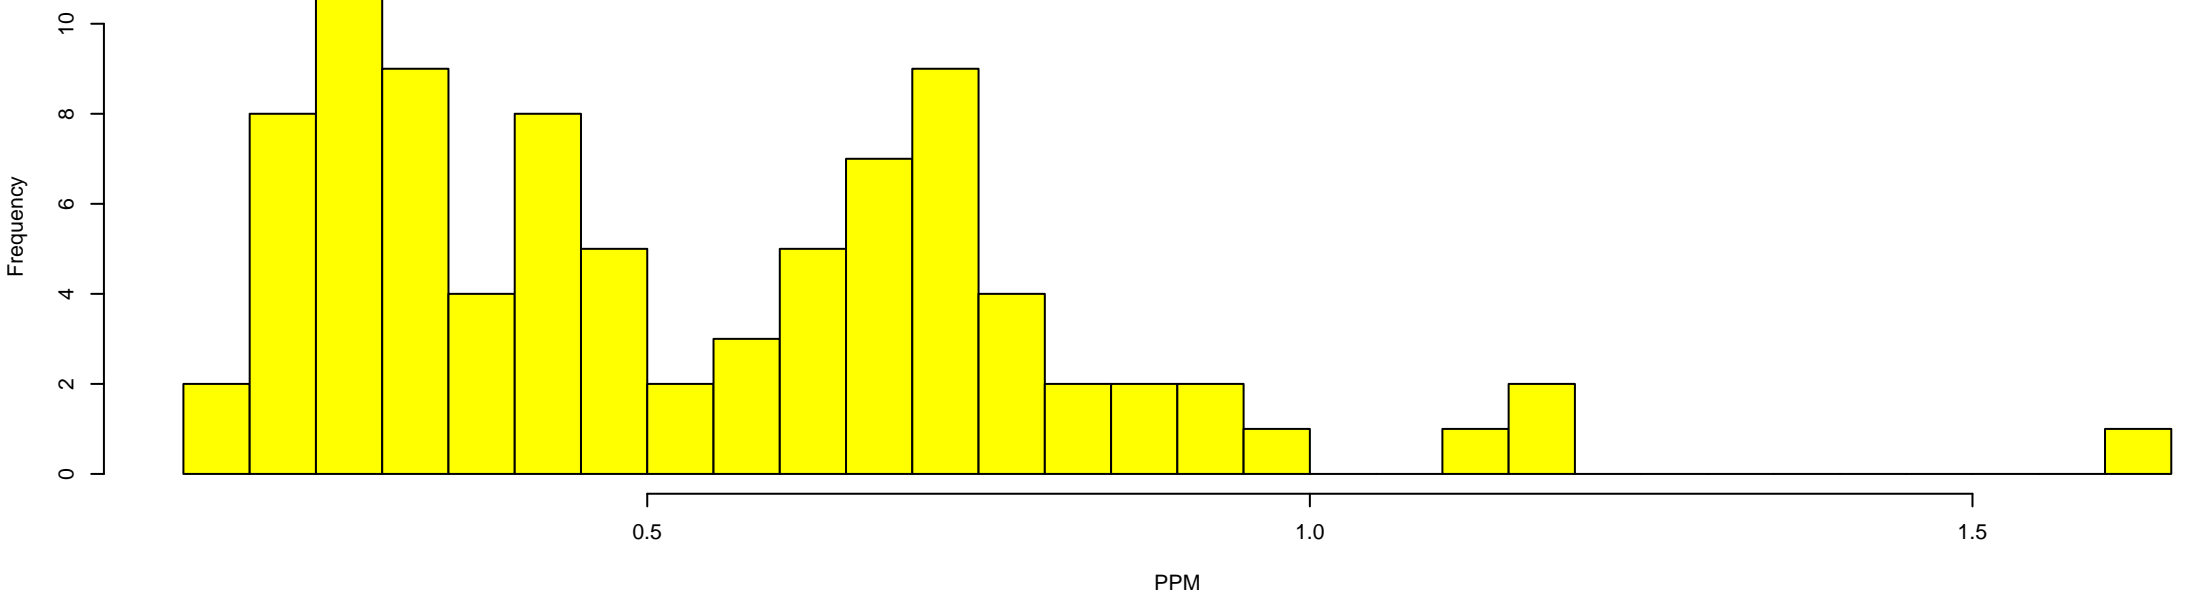

**Hydro Shoot Co**

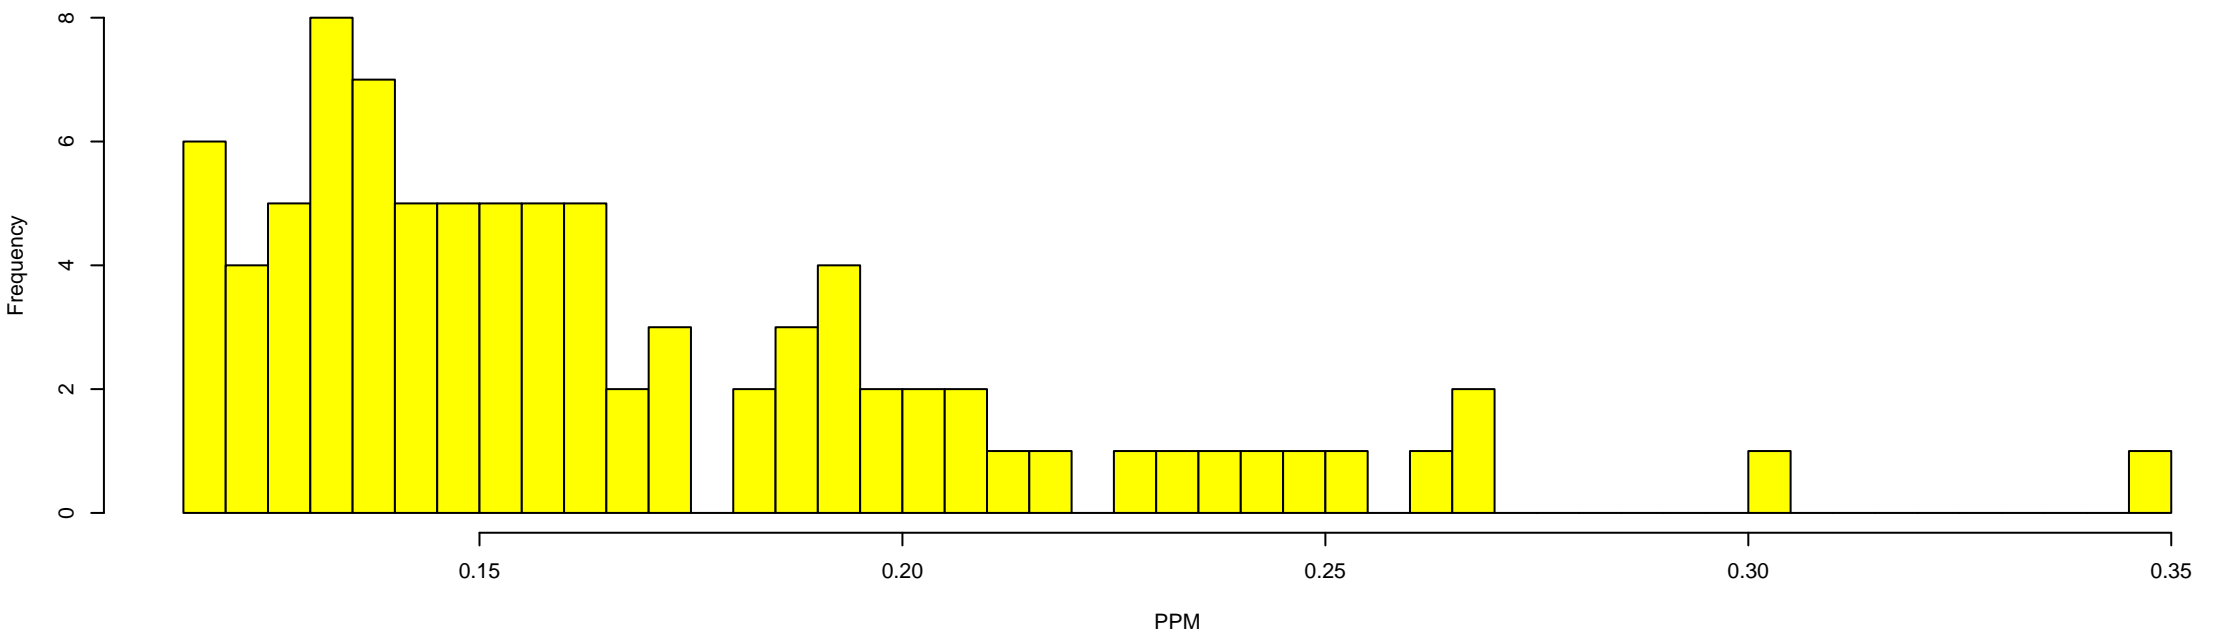

**2nd Soil Shoot Co**

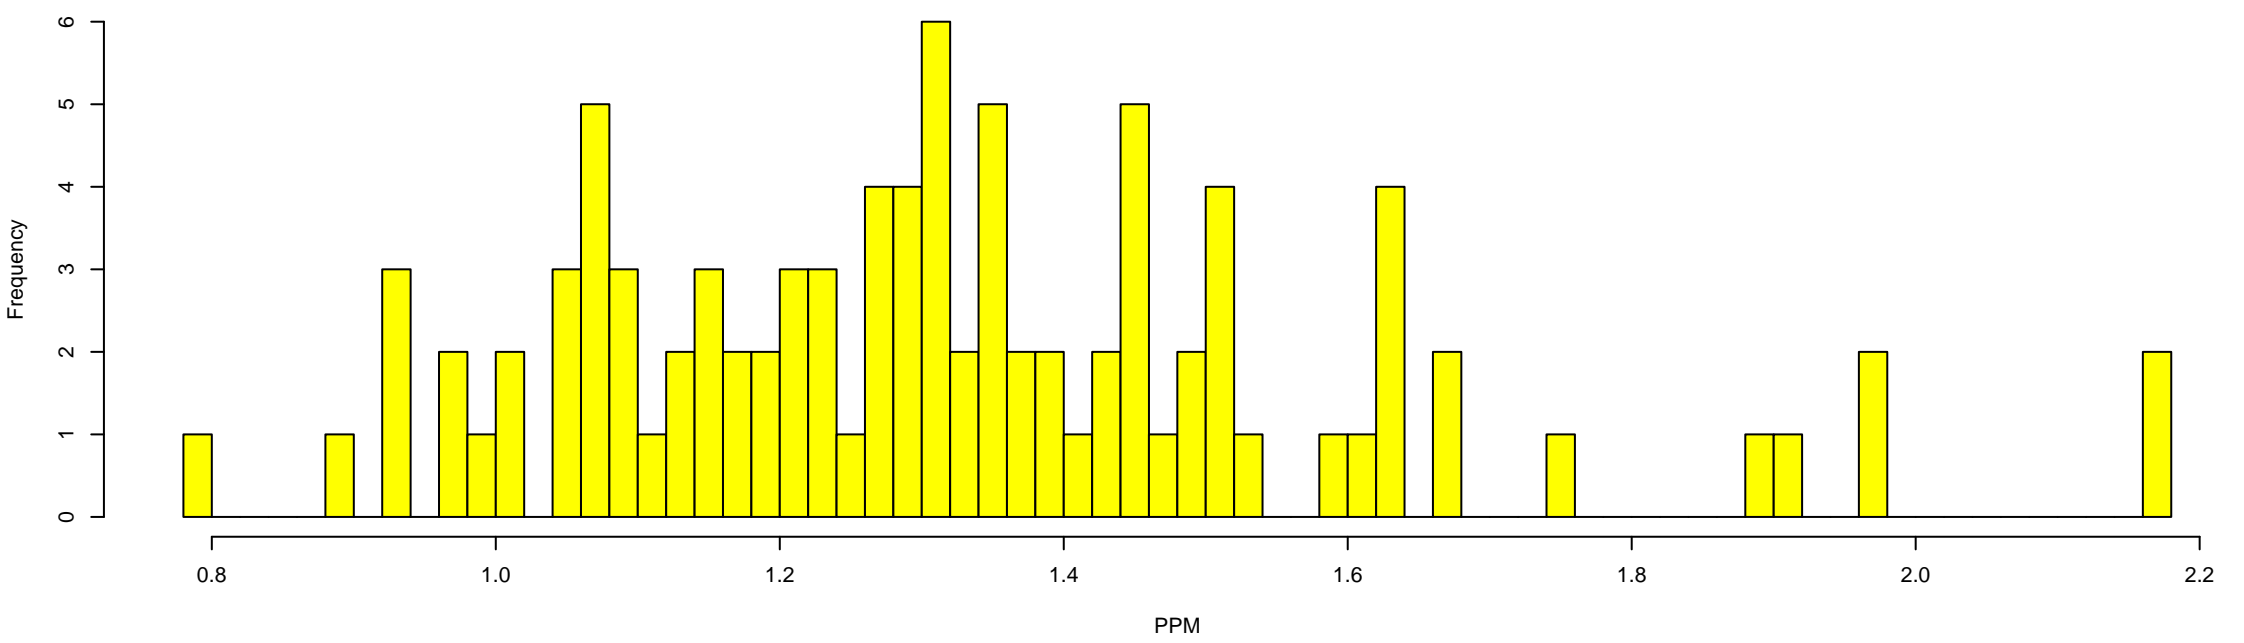

**1st Soil Shoot Co**

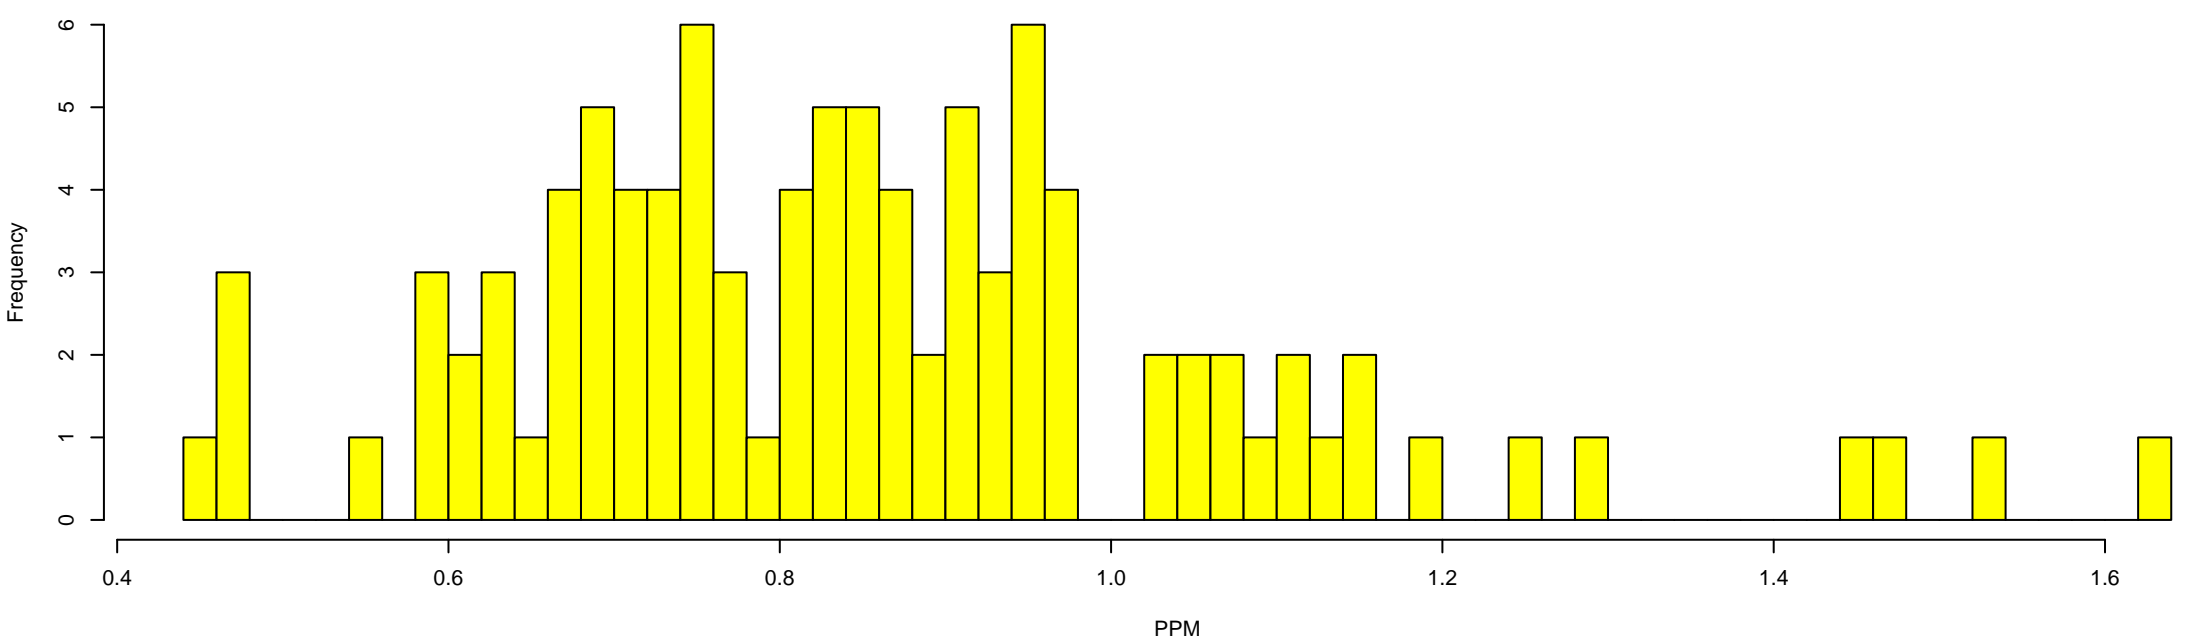

**Seed Co**

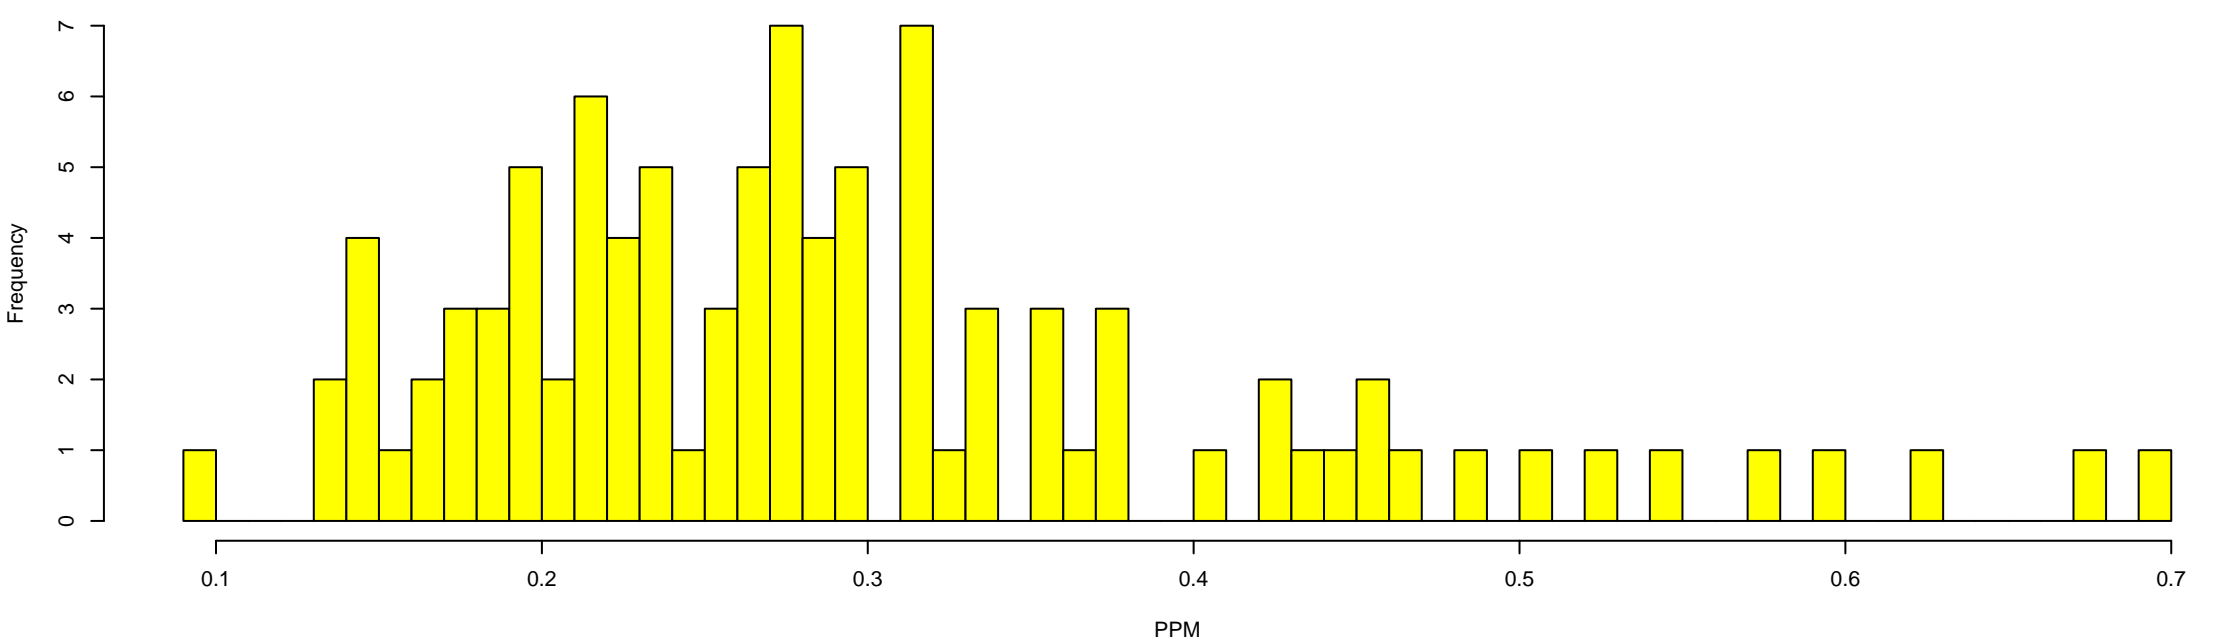

Hydro Root Ni

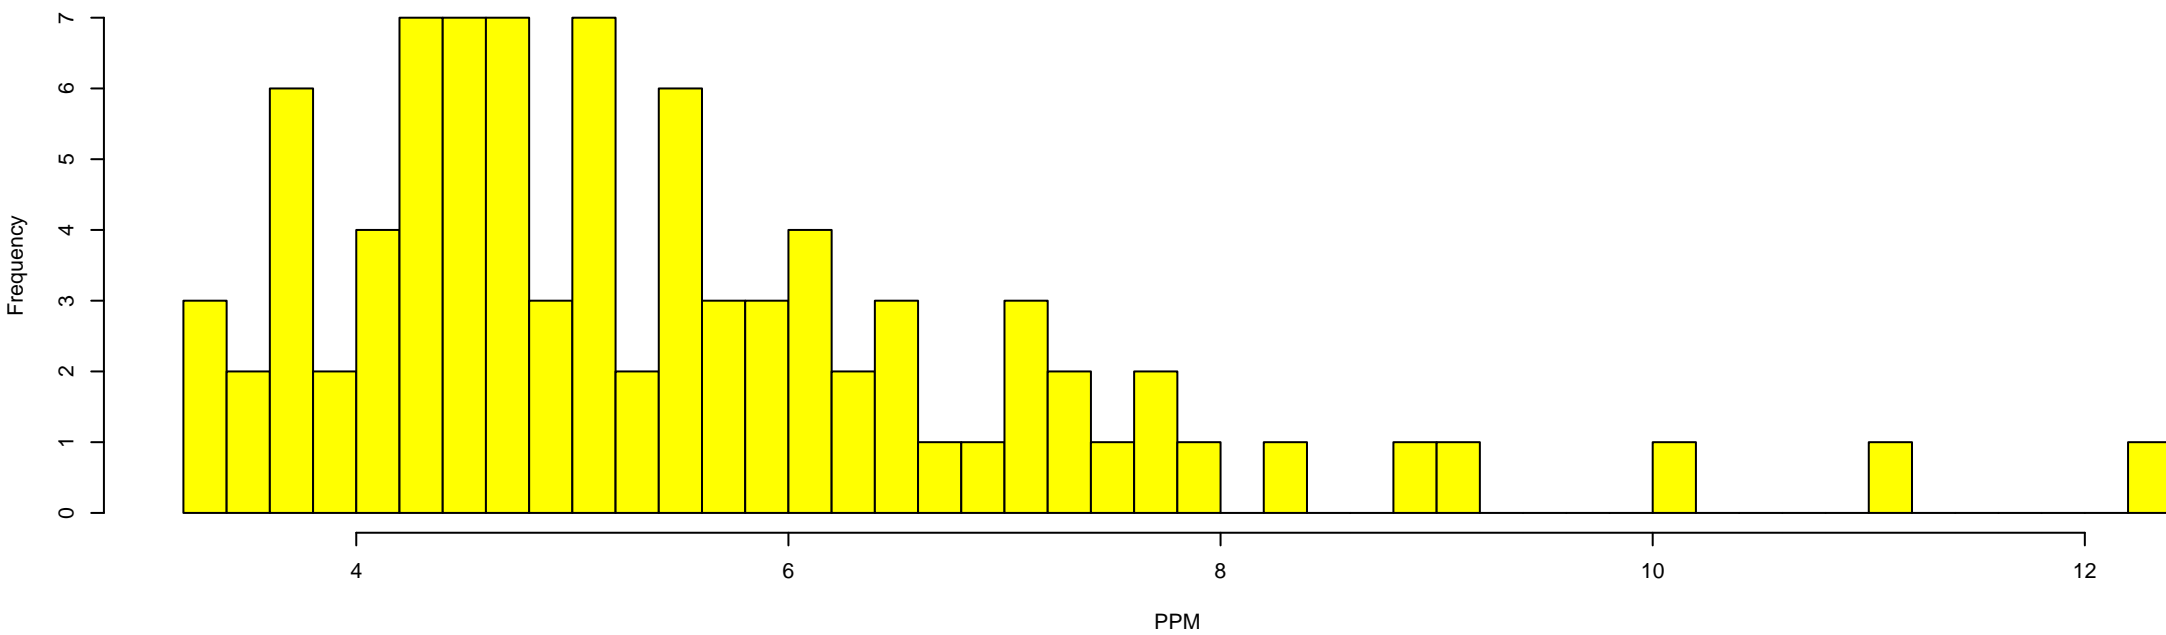

Hydro Shoot Ni

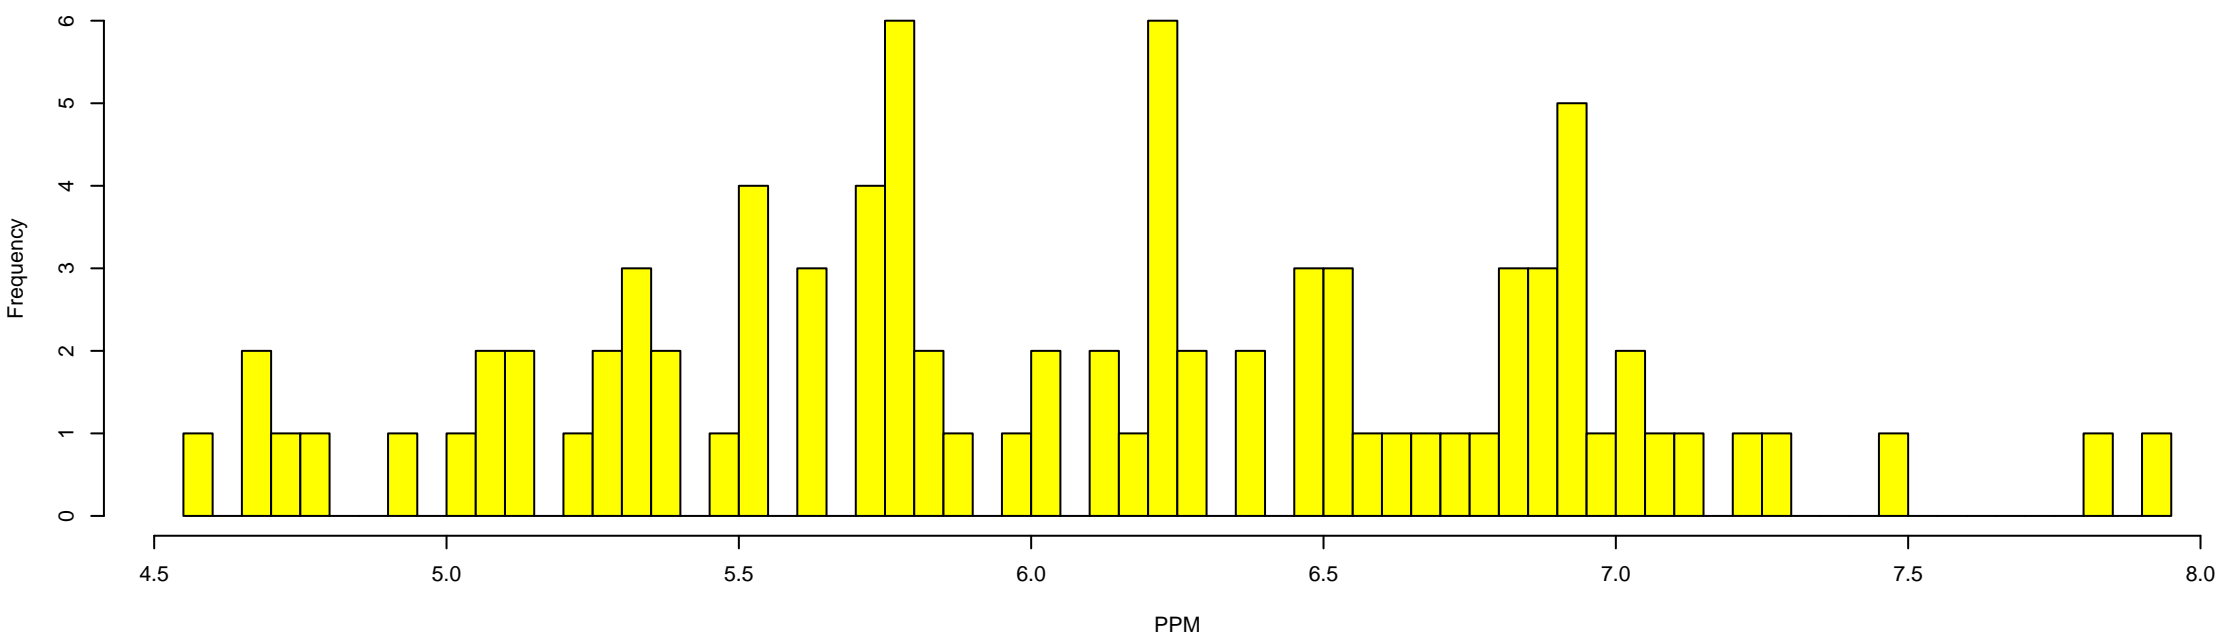

2nd Soil Shoot Ni

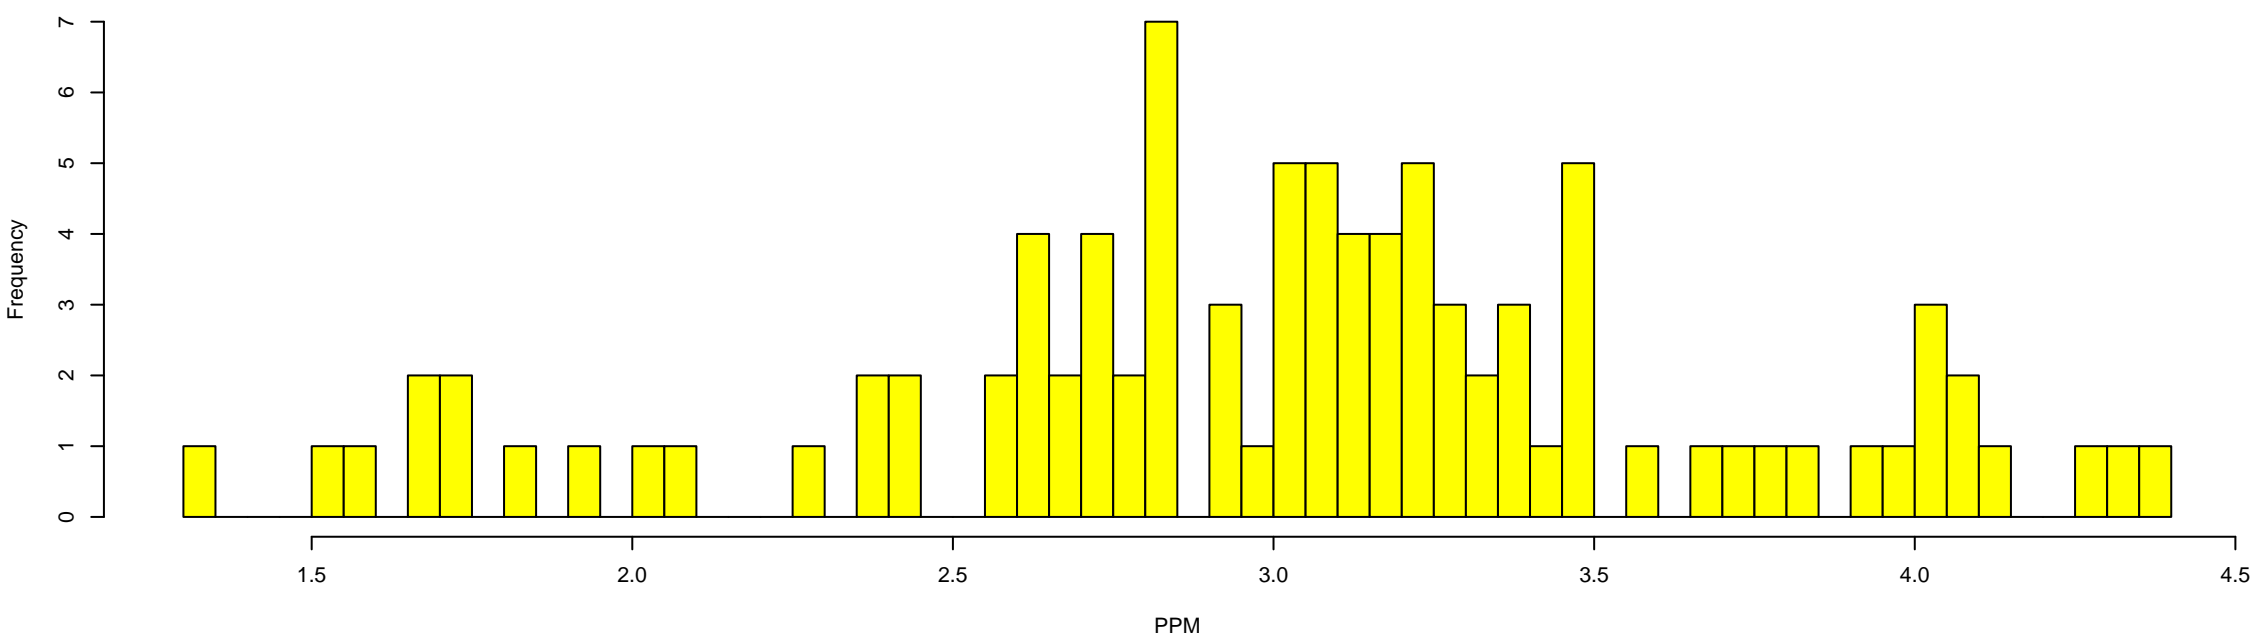

1st Soil Shoot Ni

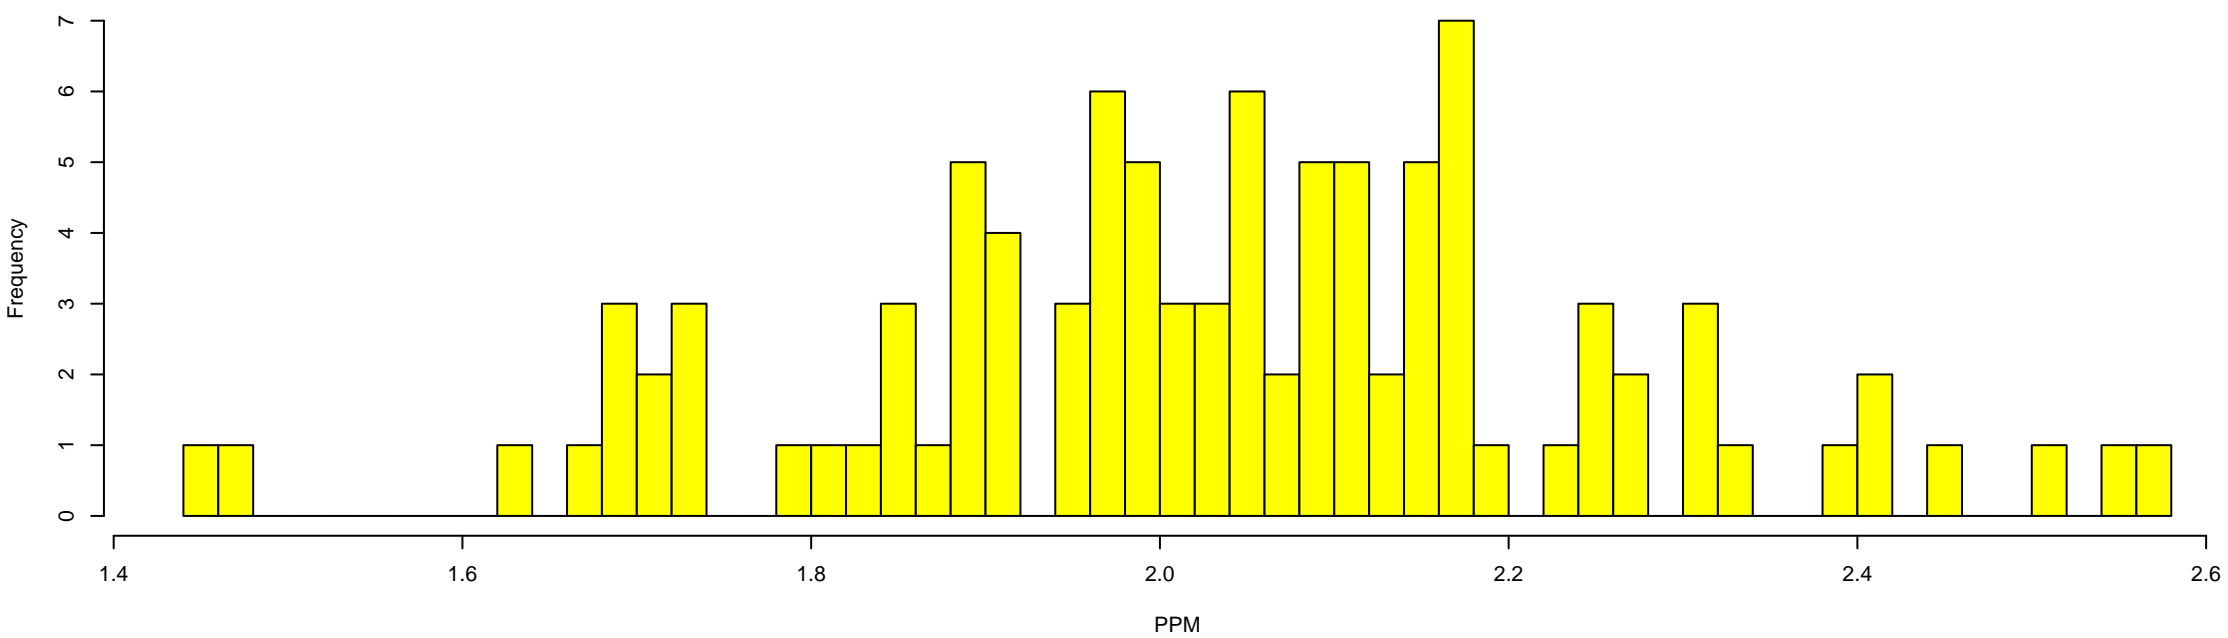

Seed Ni

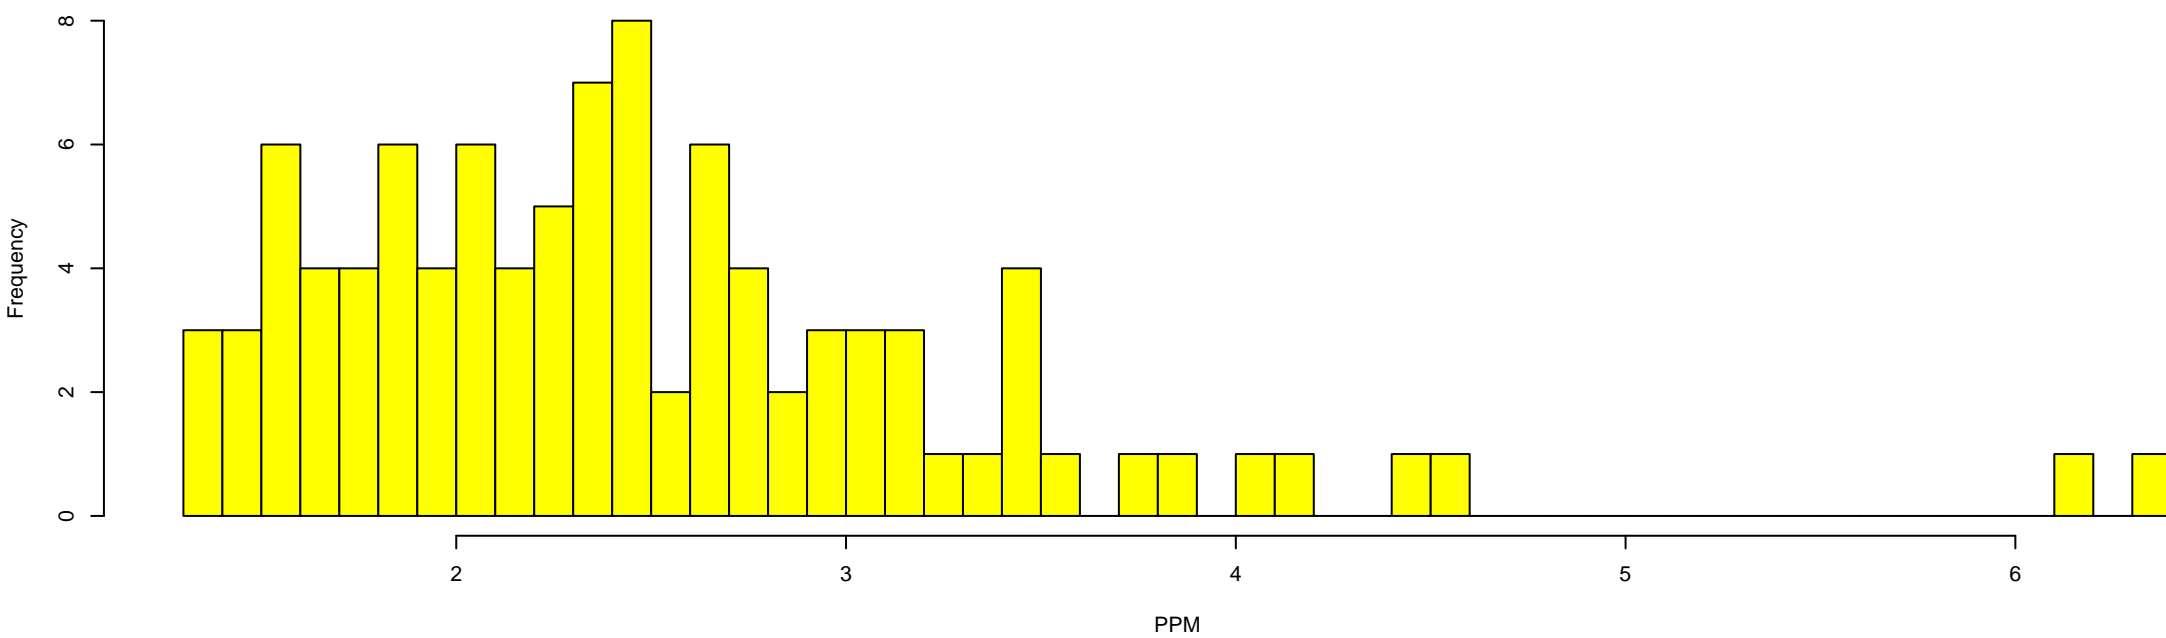

**Hydro Root Cu**

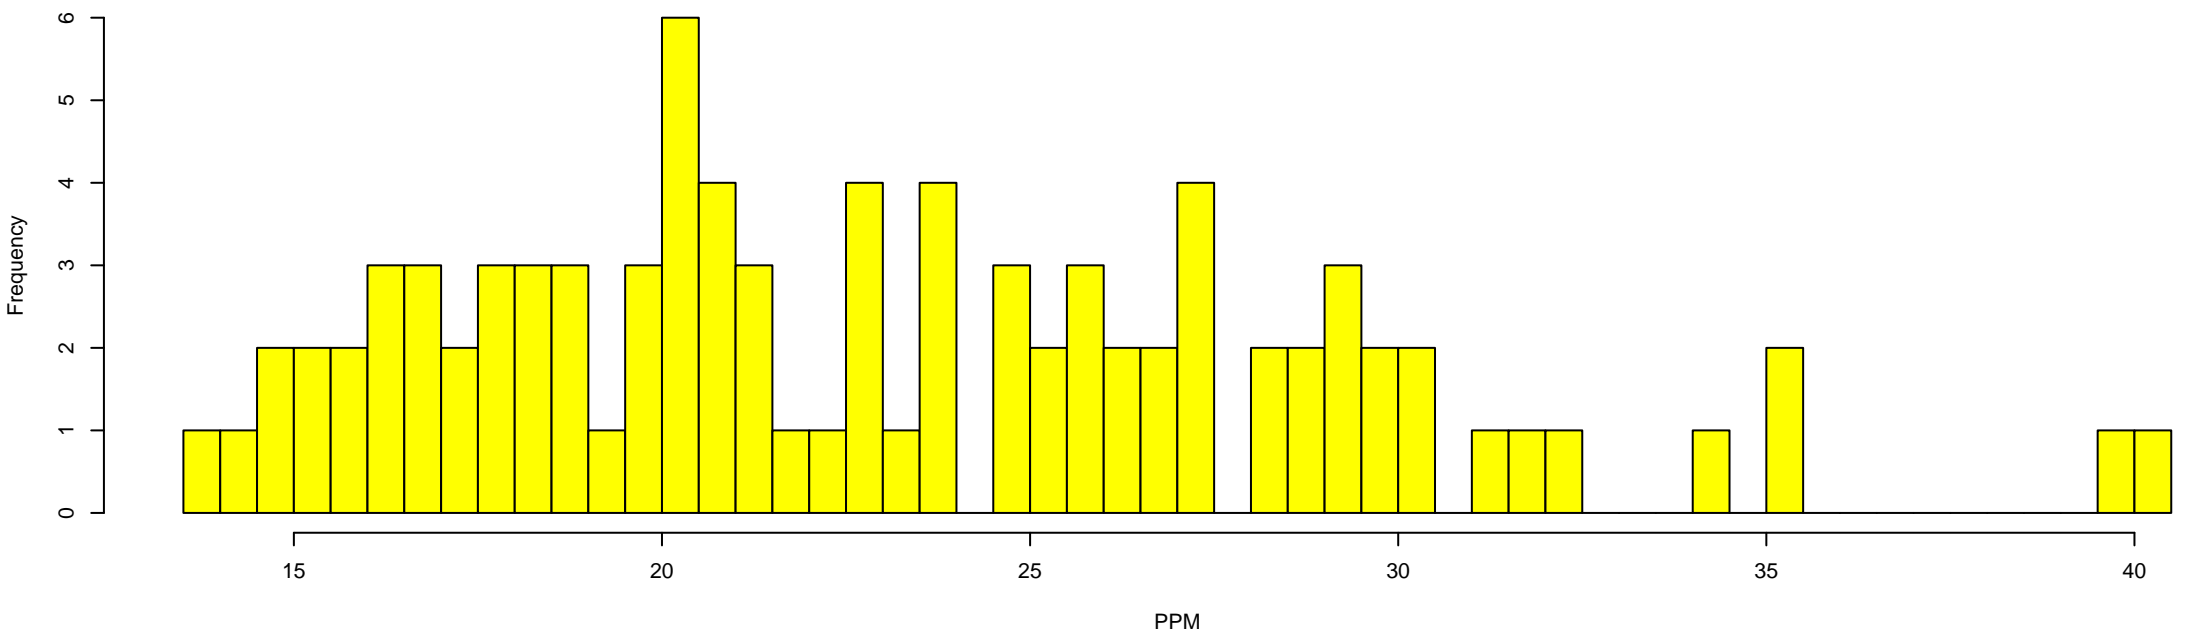

**Hydro Shoot Cu**

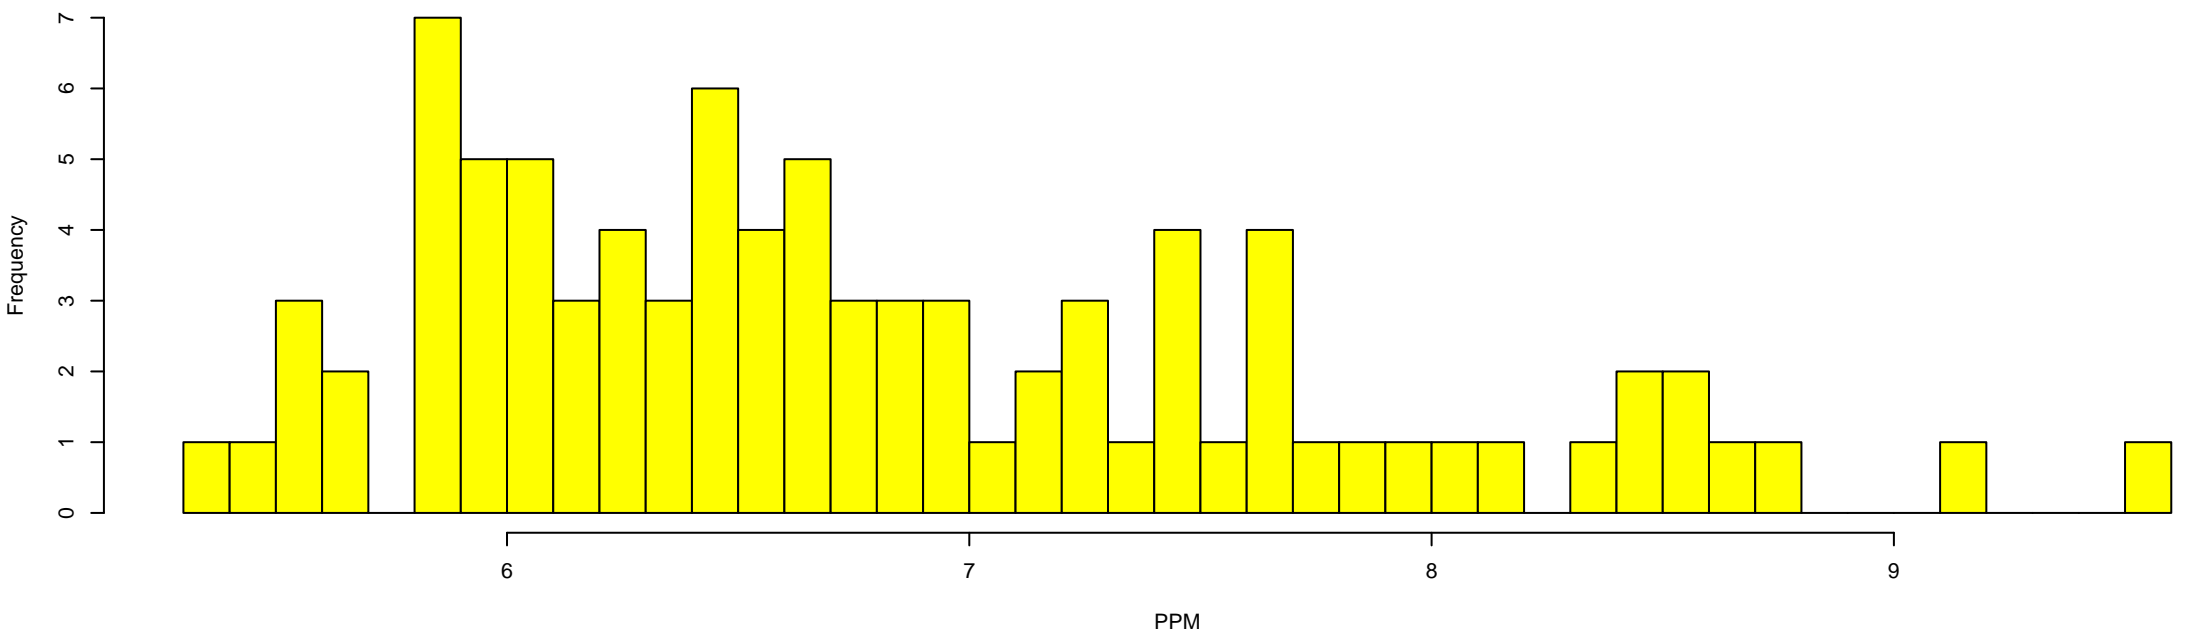

**2nd Soil Shoot Cu**

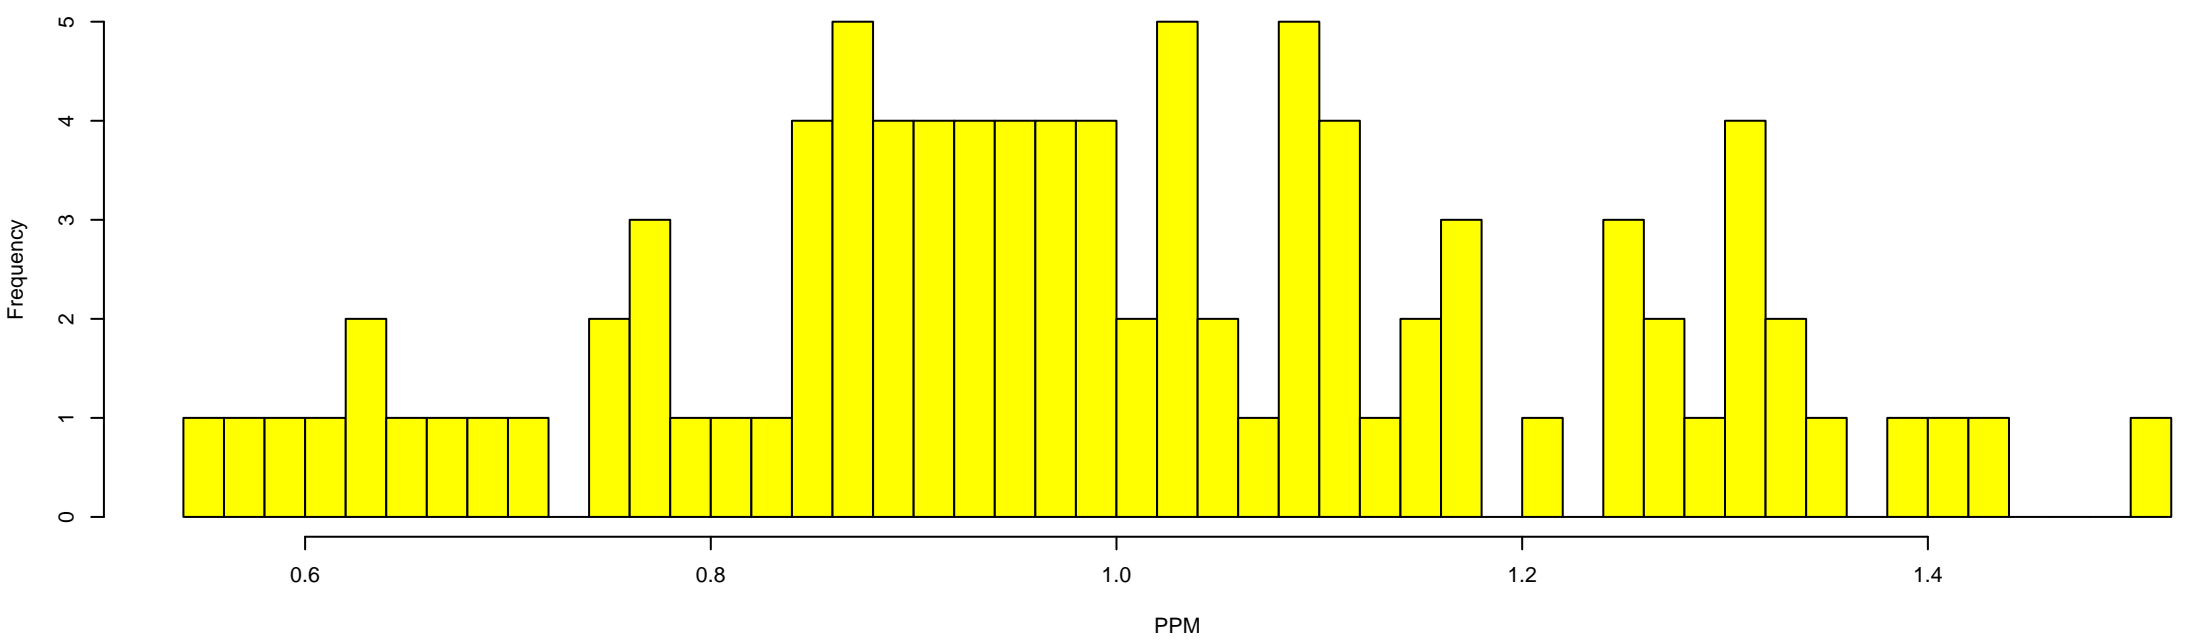

**1st Soil Shoot Cu**

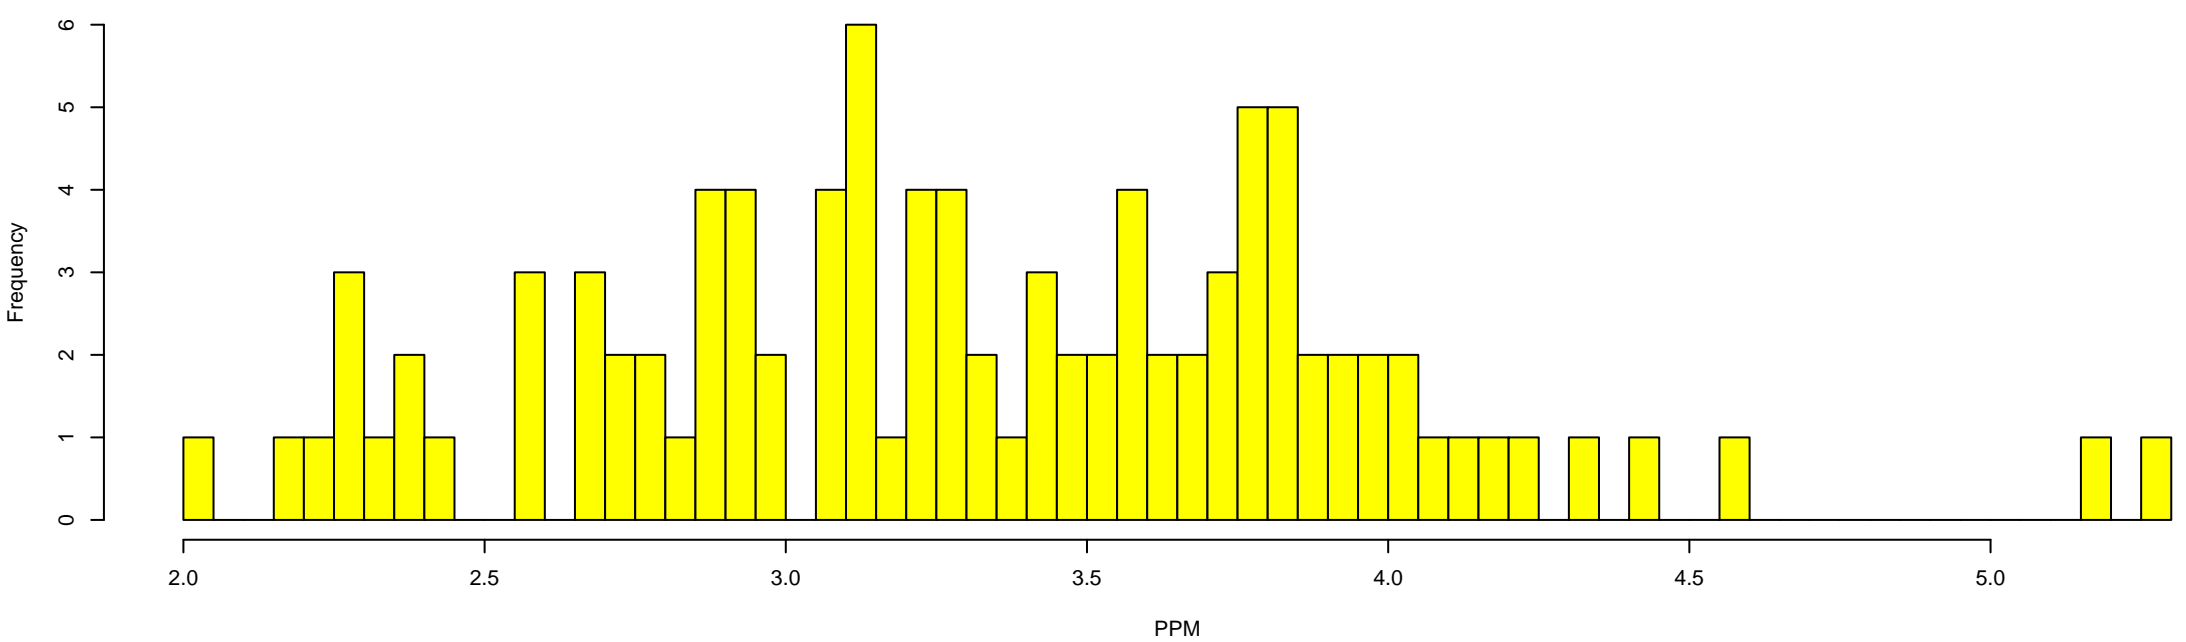

**Seed Cu**

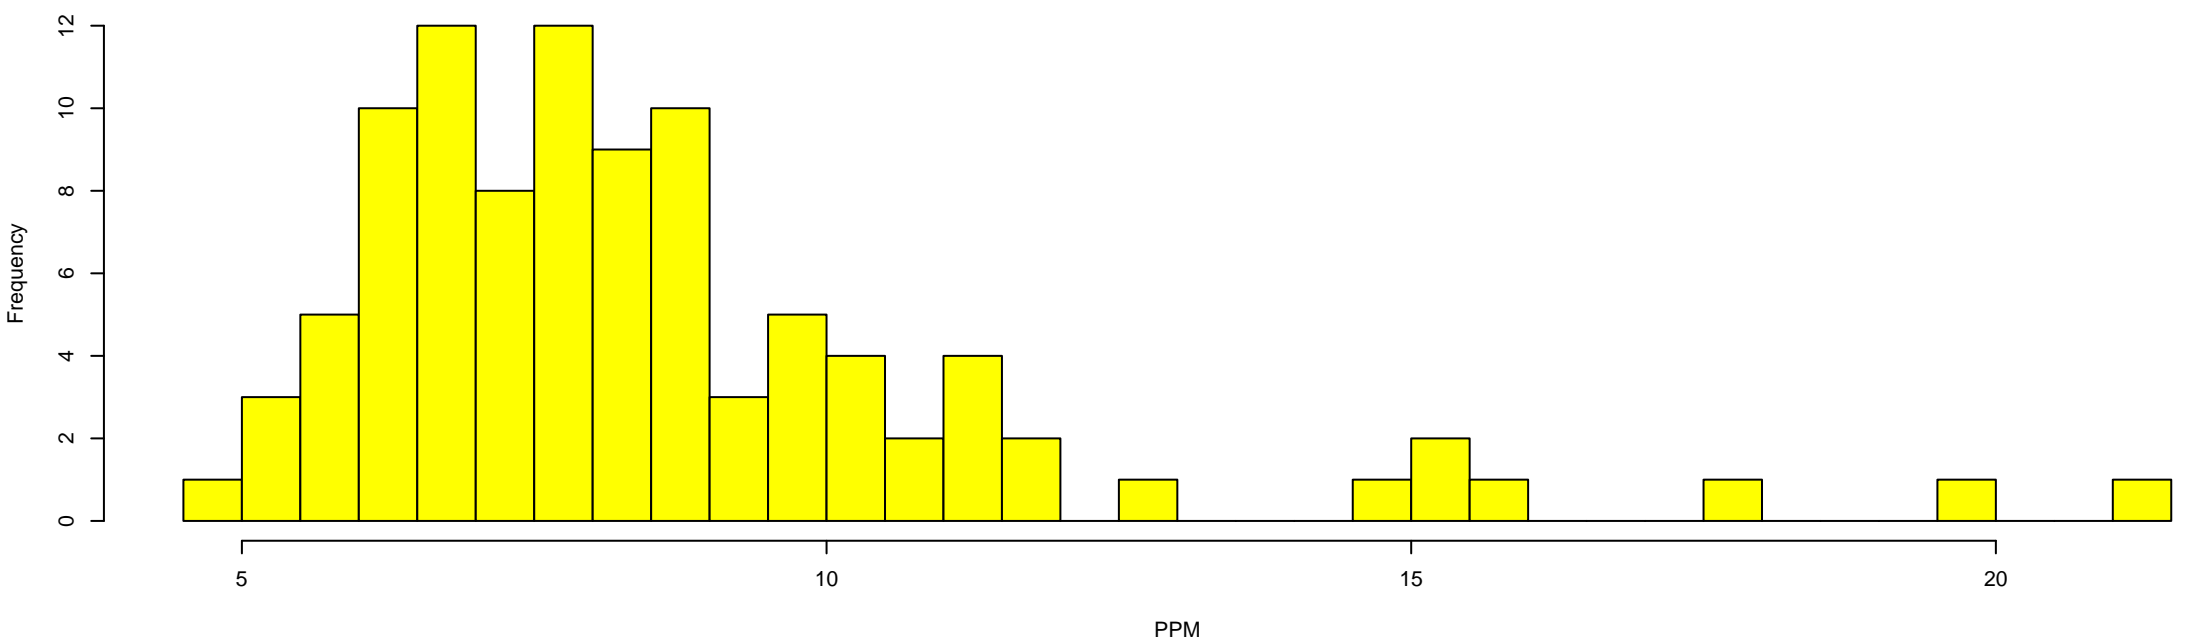

Hydro Root Zn

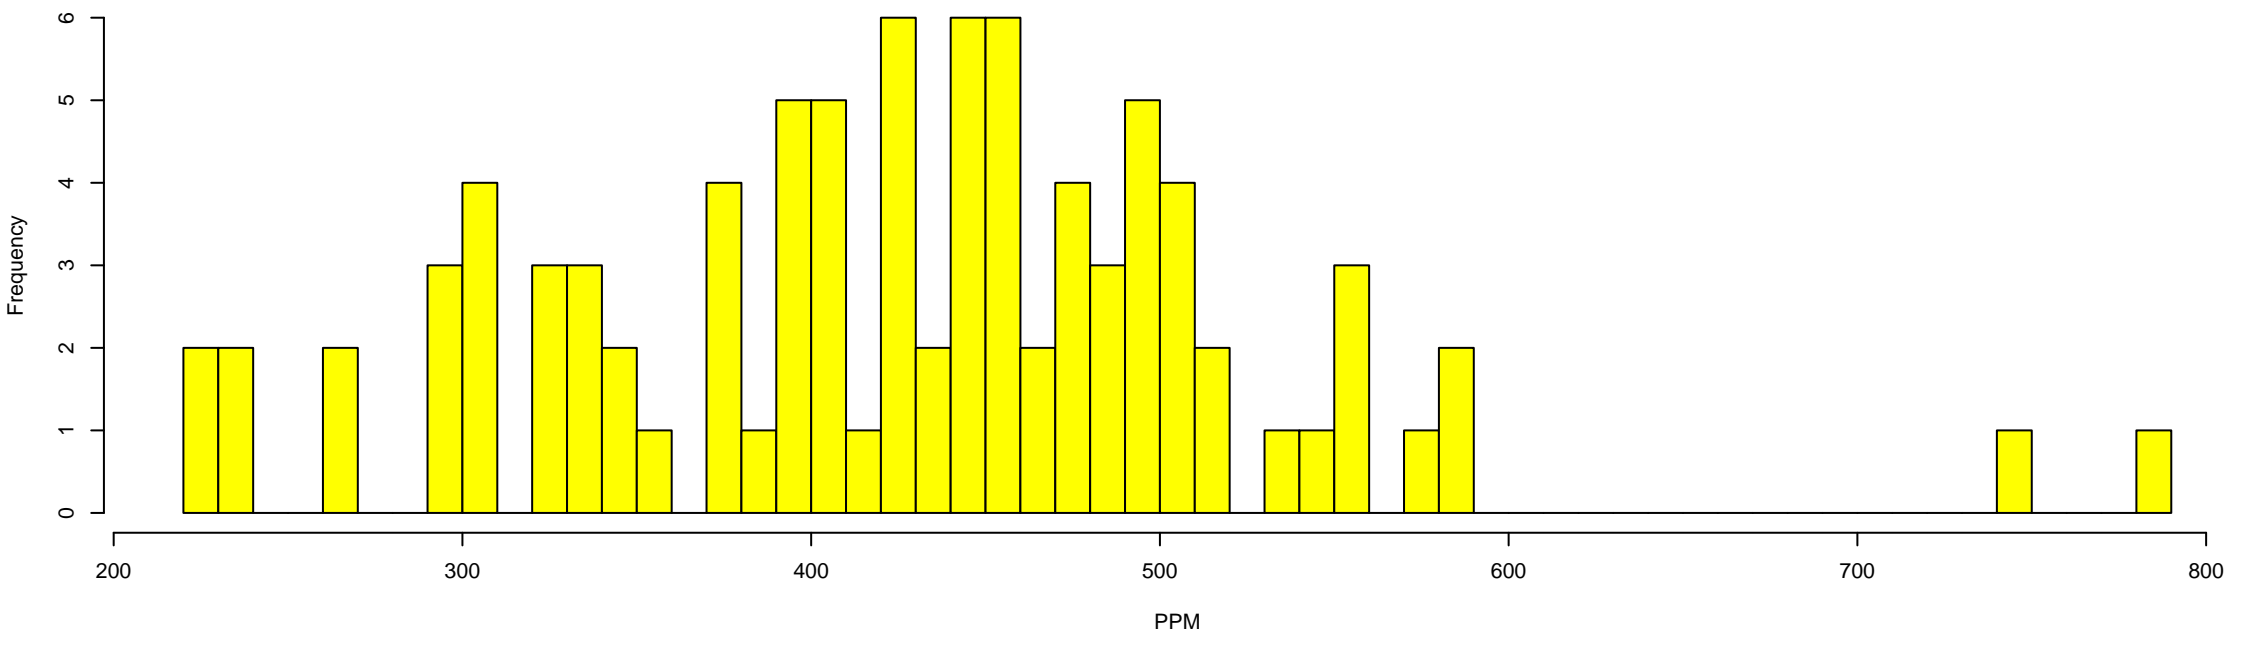

Hydro Shoot Zn

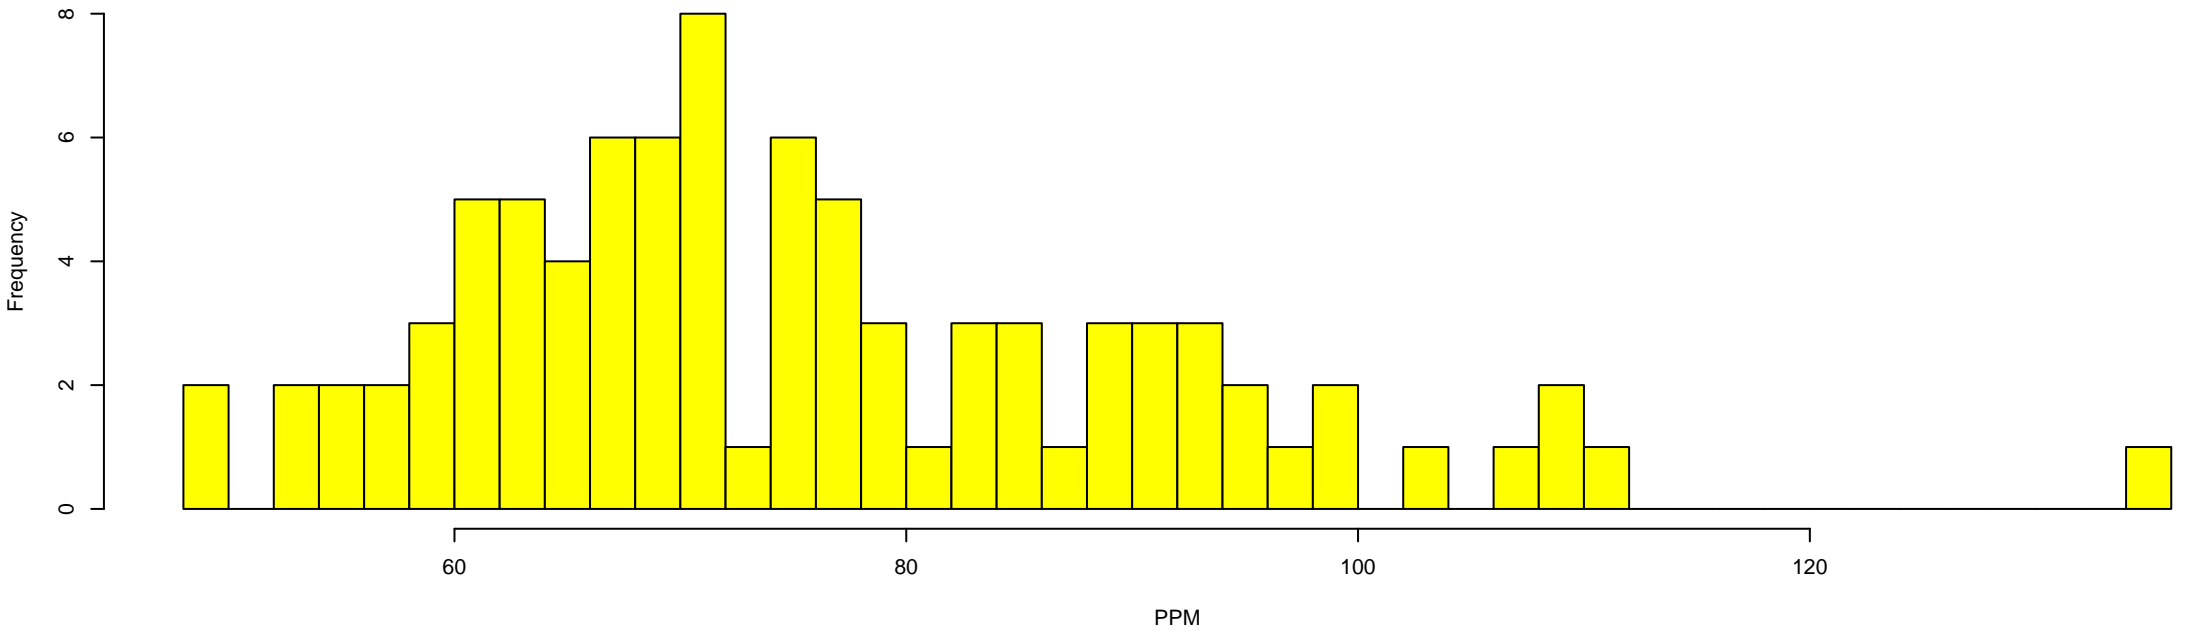

2nd Soil Shoot Zn

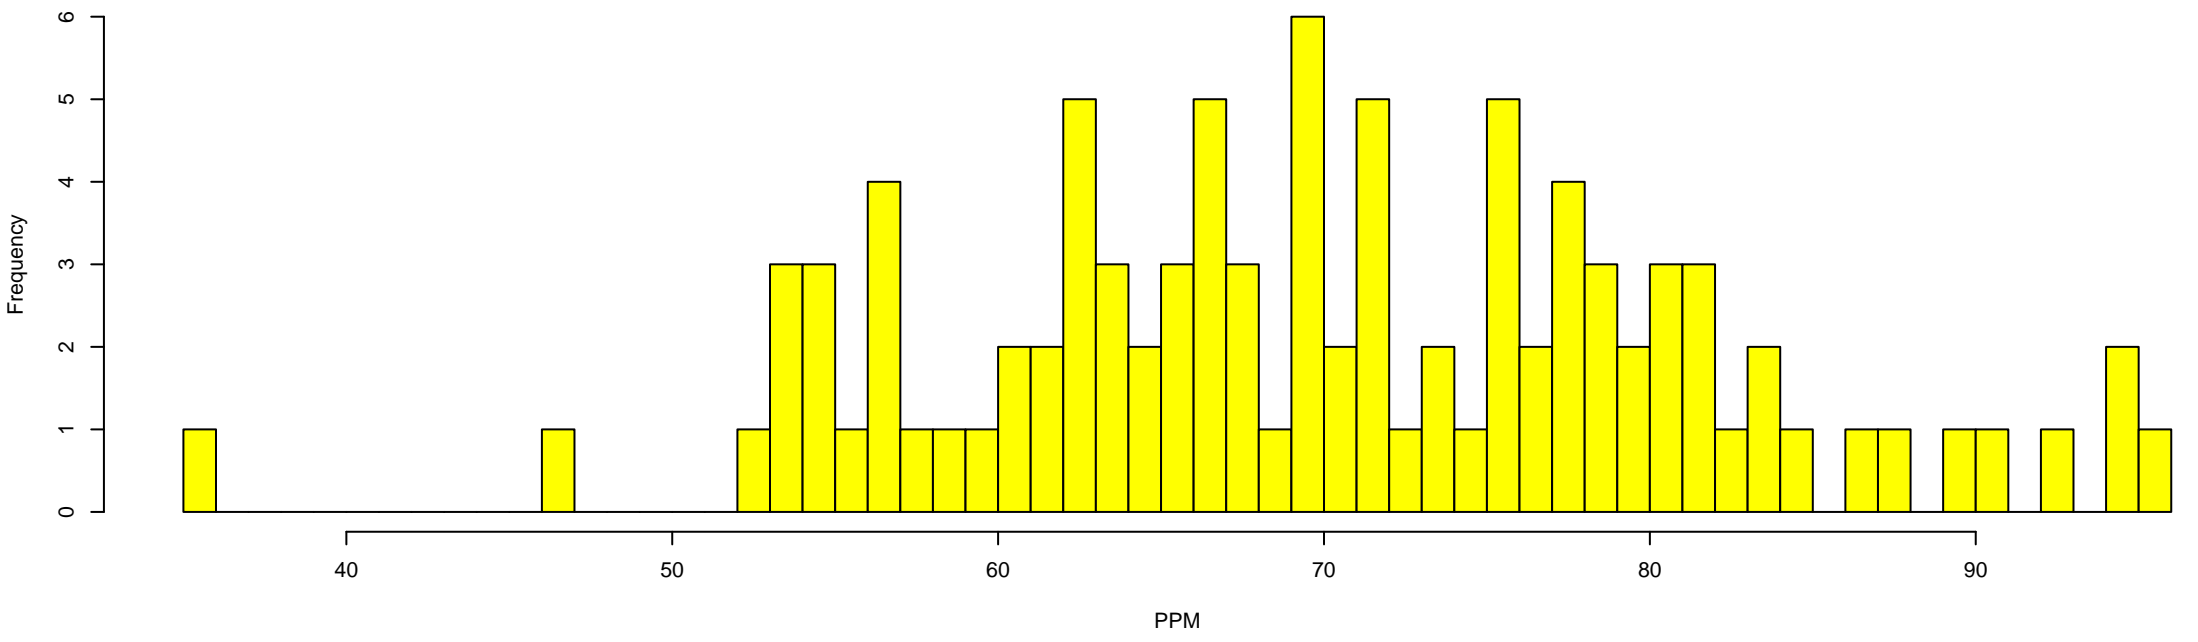

1st Soil Shoot Zn

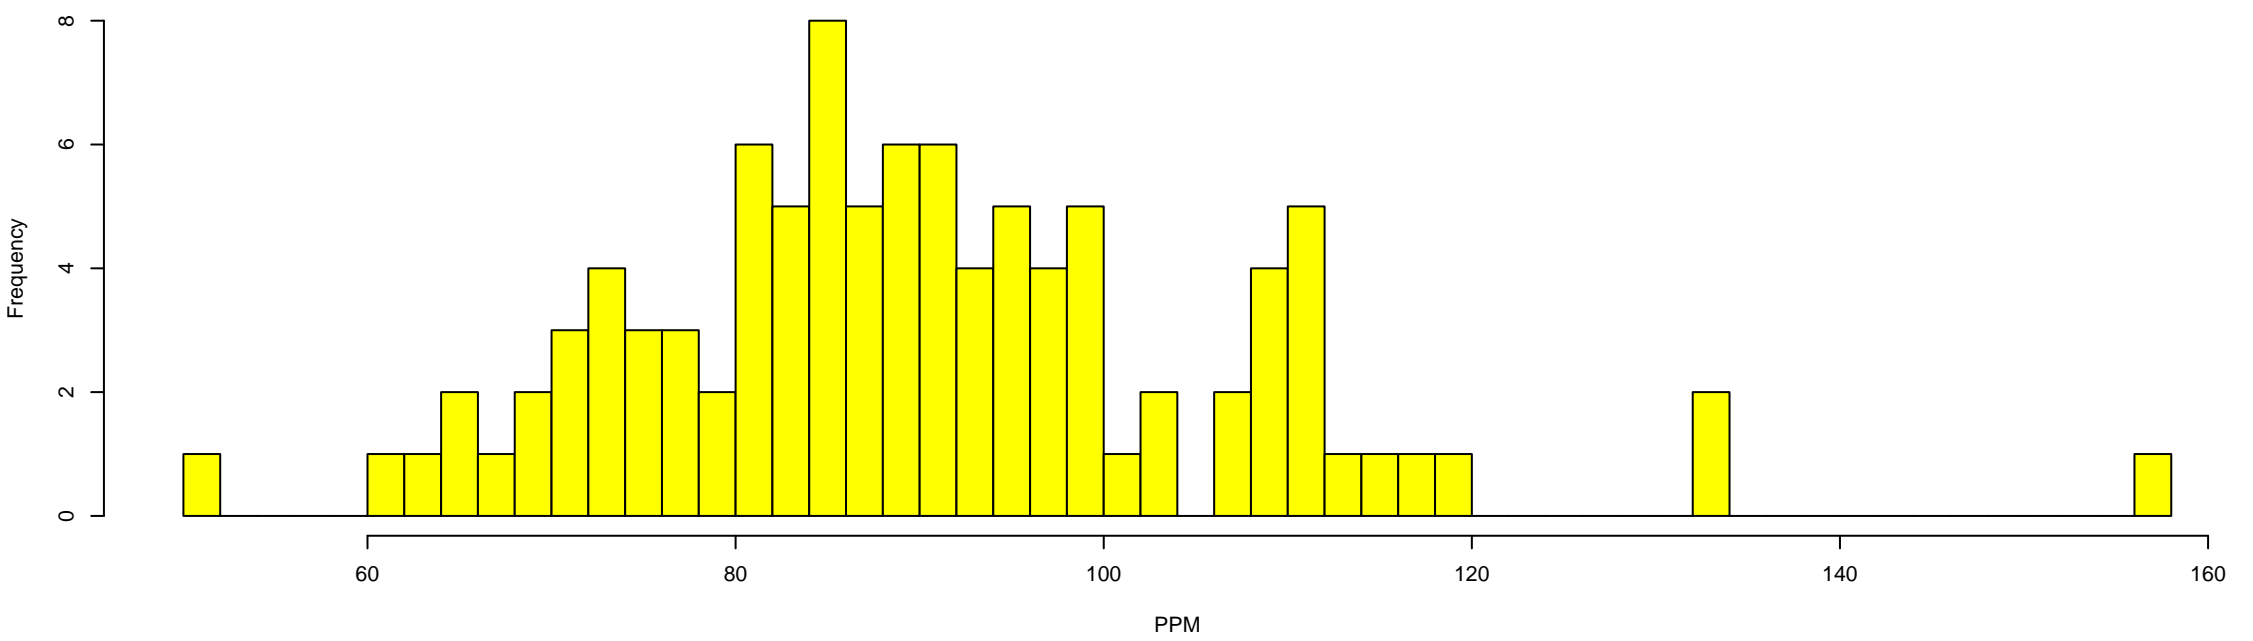

Hydro Root As

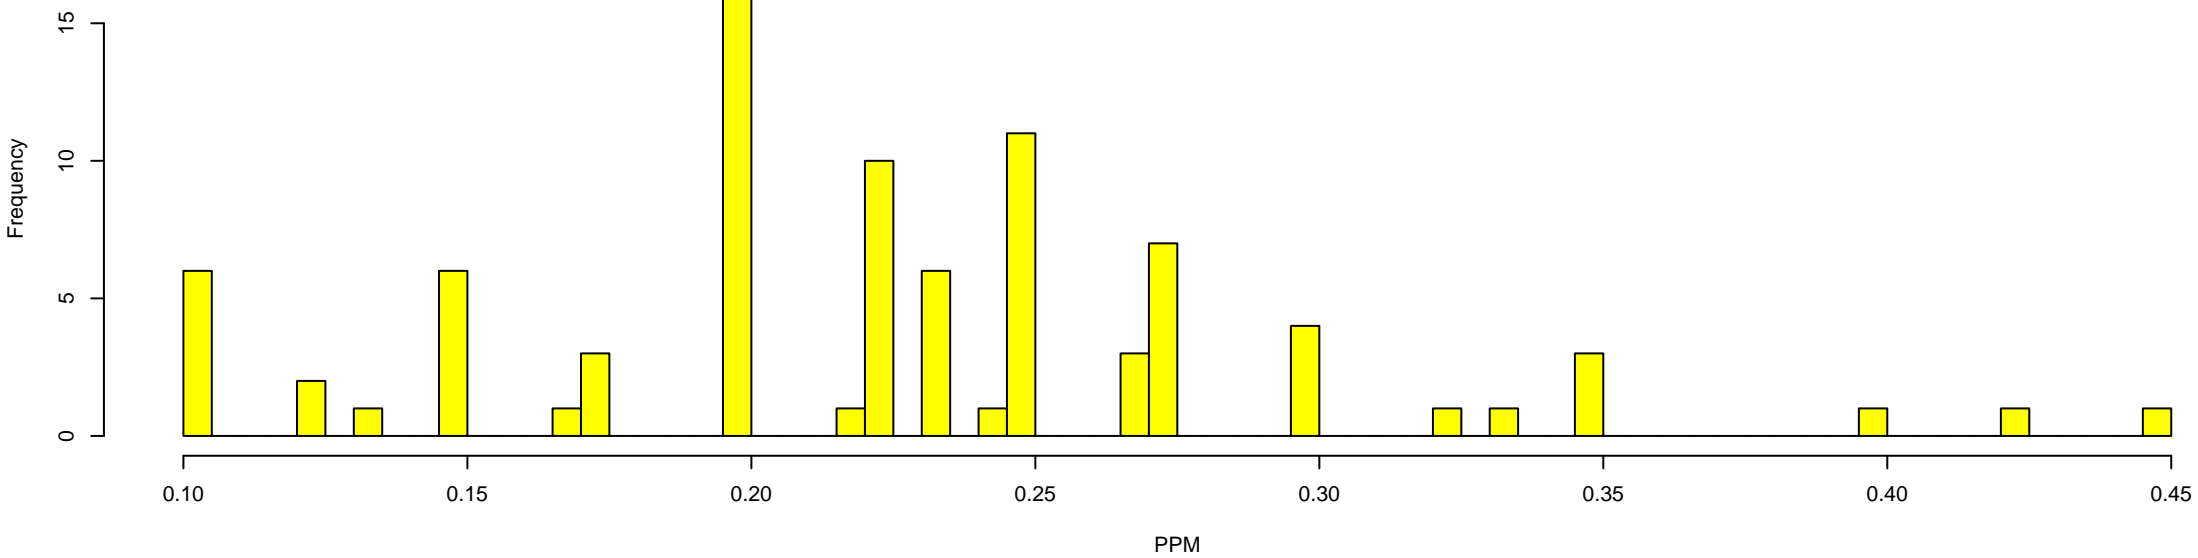

Hydro Shoot As

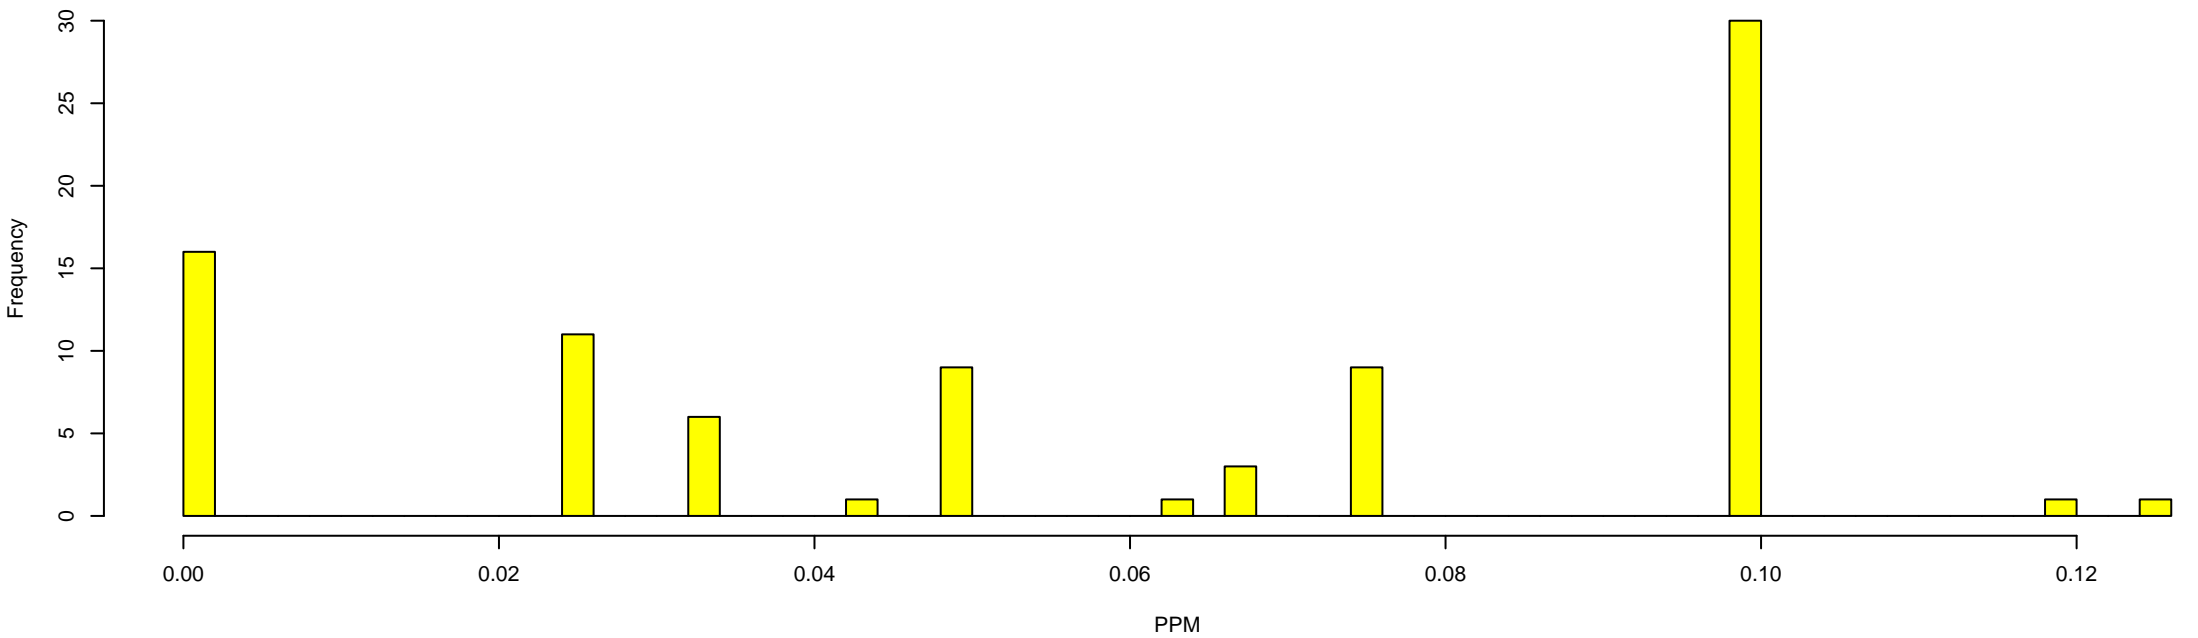

2nd Soil Shoot As

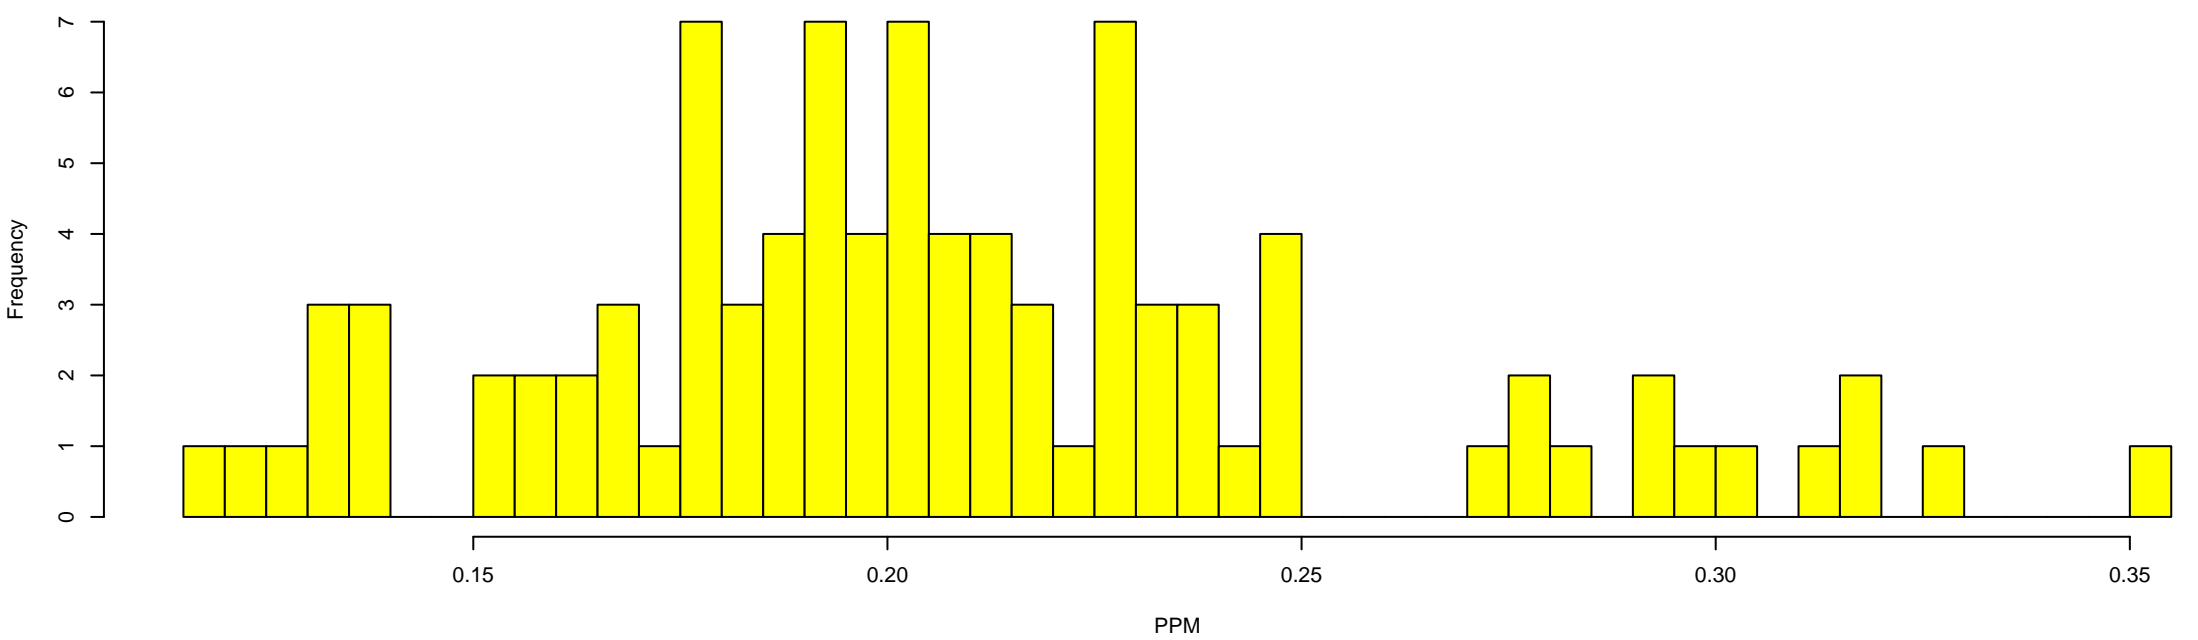

1st Soil Shoot As

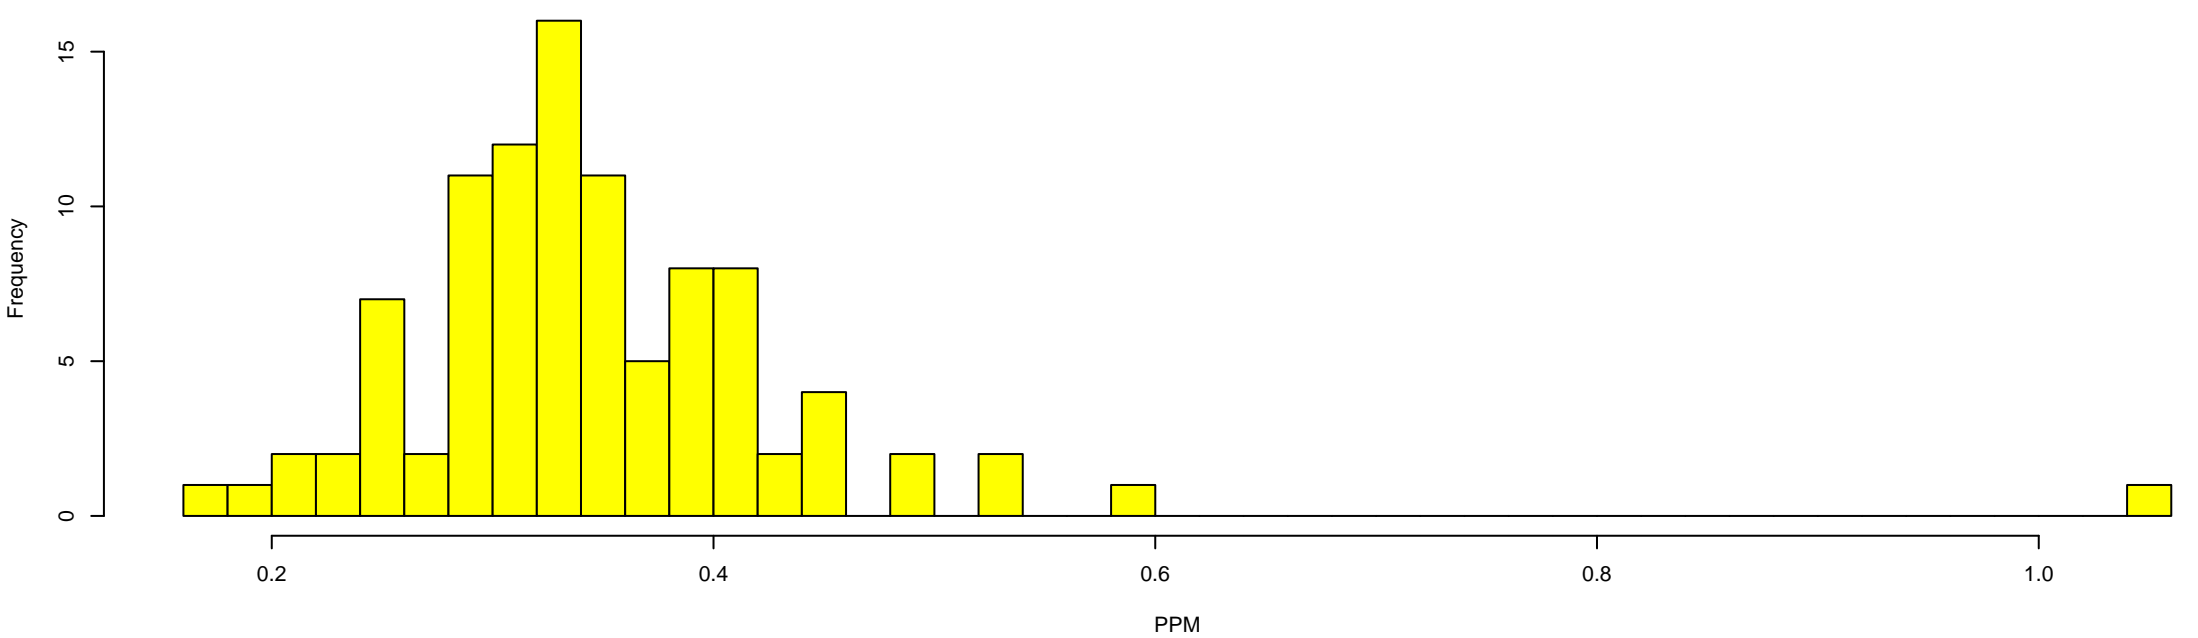

Seed As

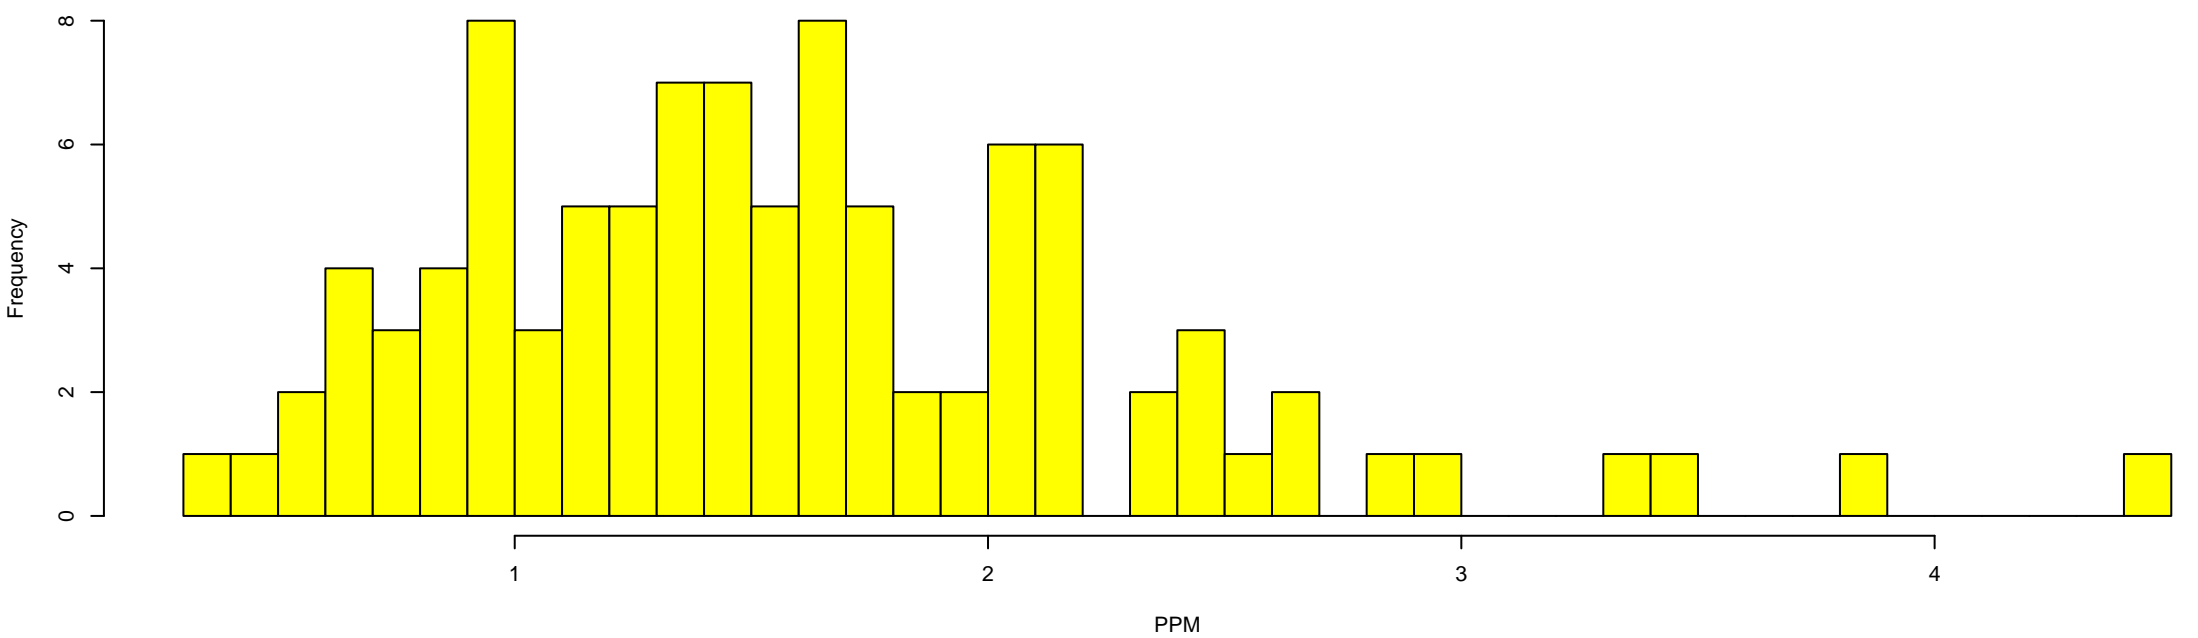

Hydro Root Se

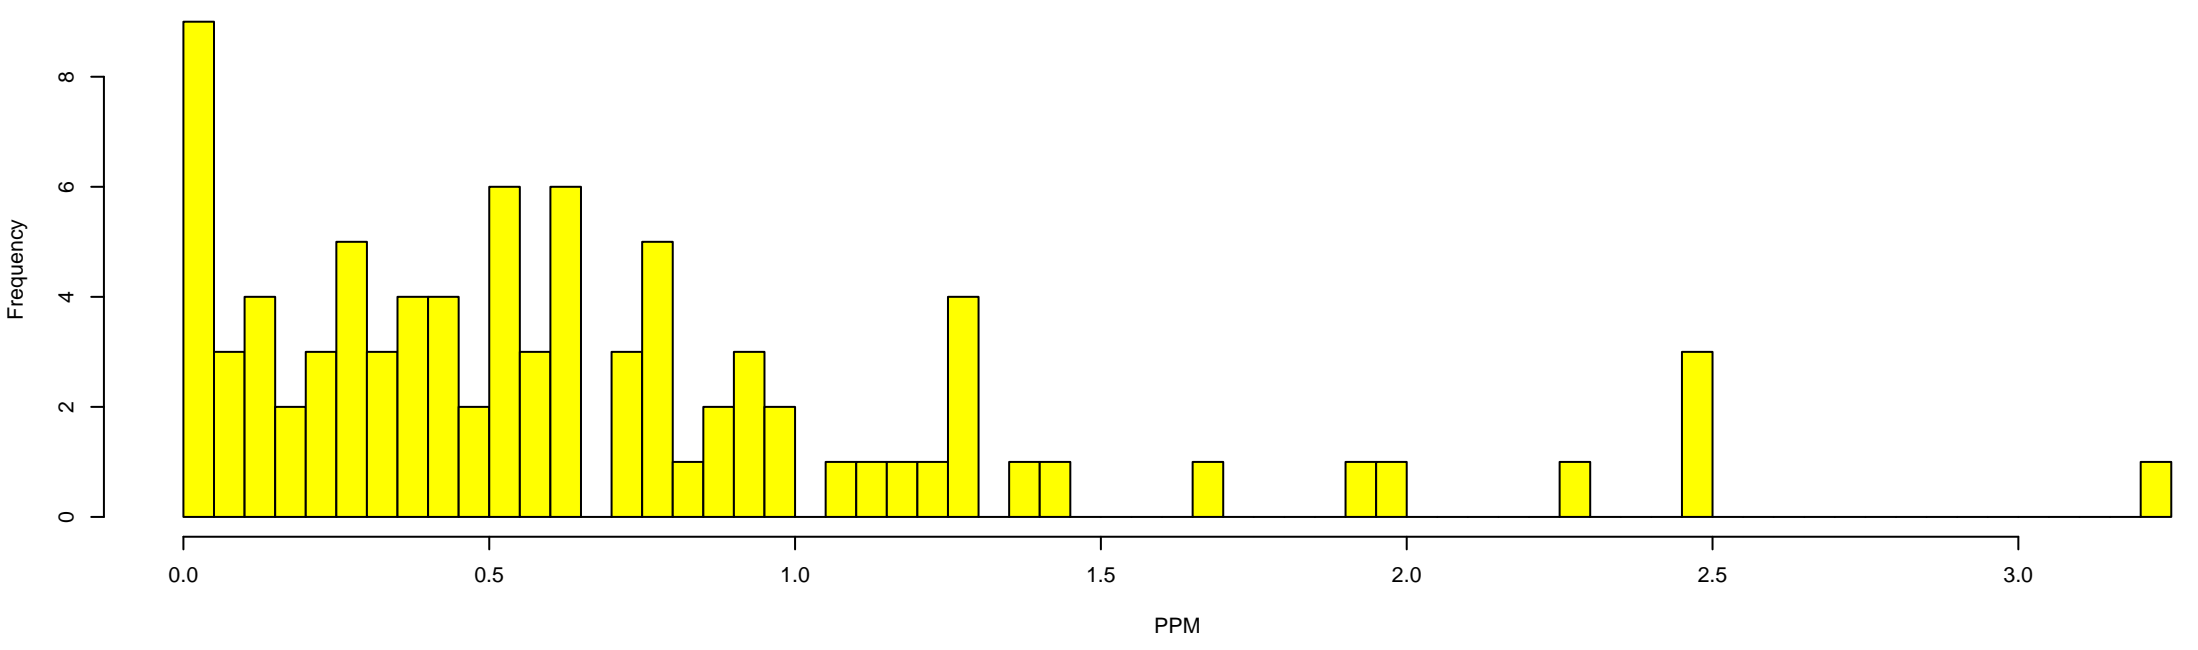

Hydro Shoot Se

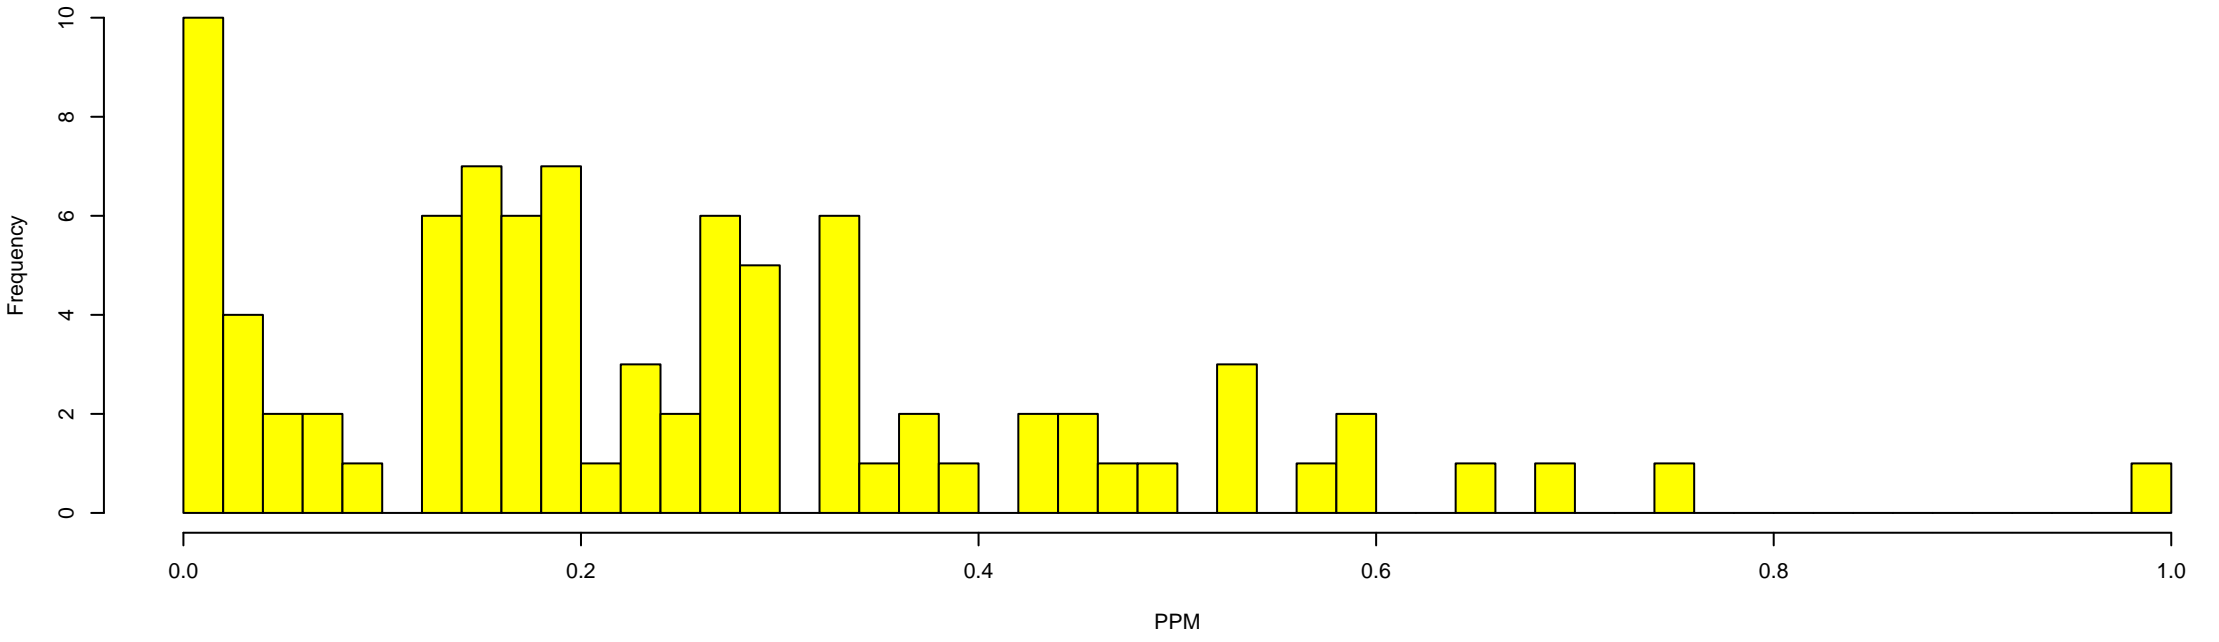

2nd Soil Shoot Se

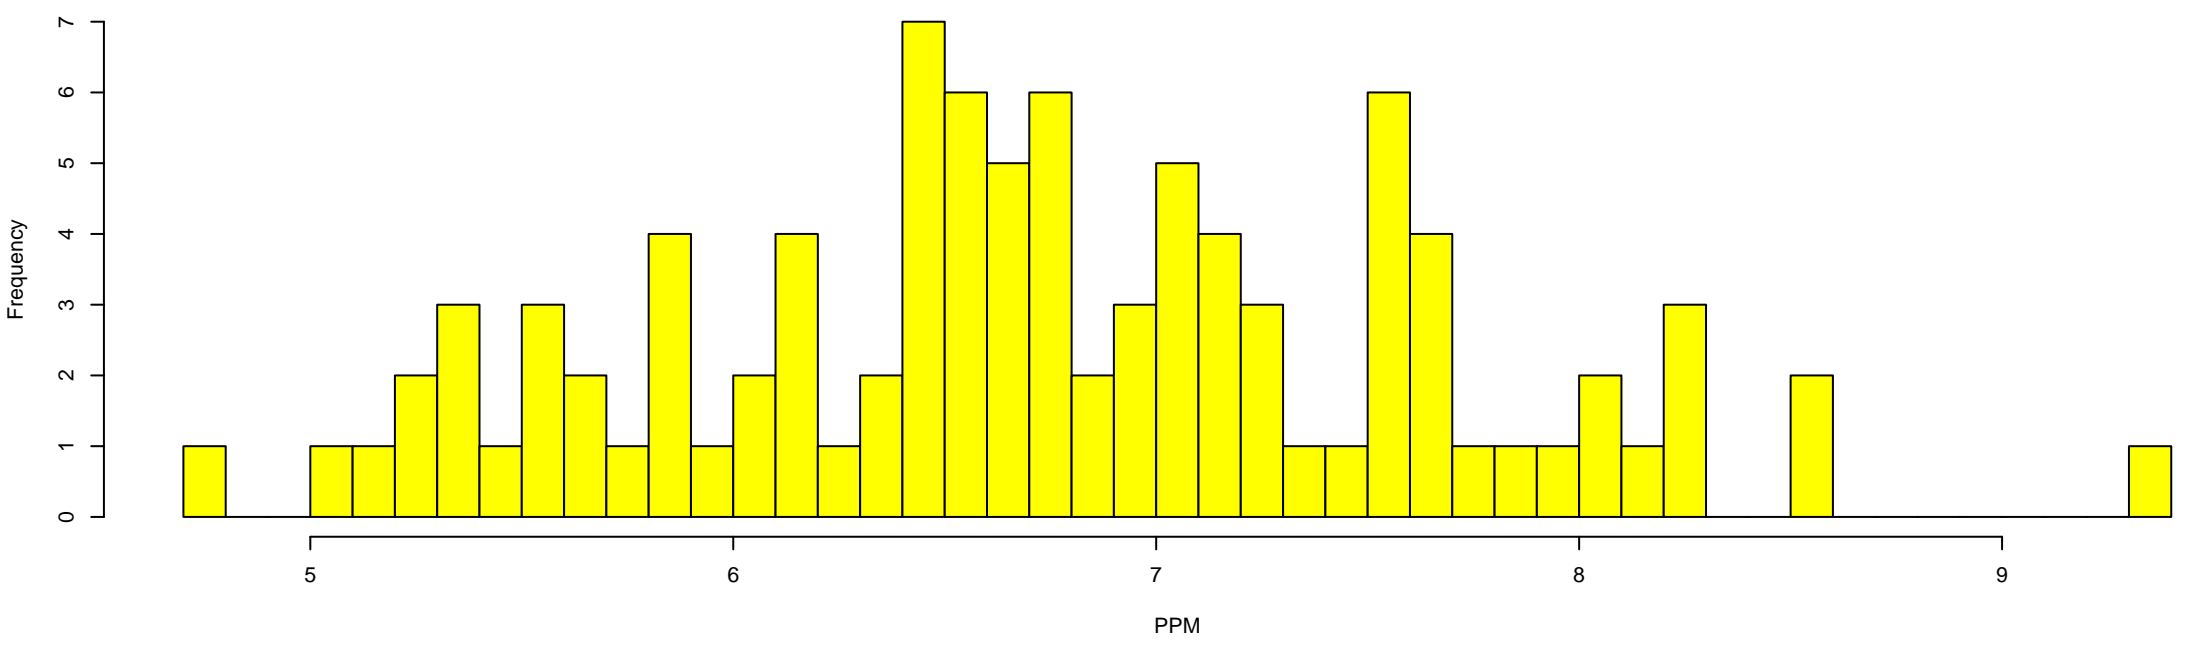

1st Soil Shoot Se

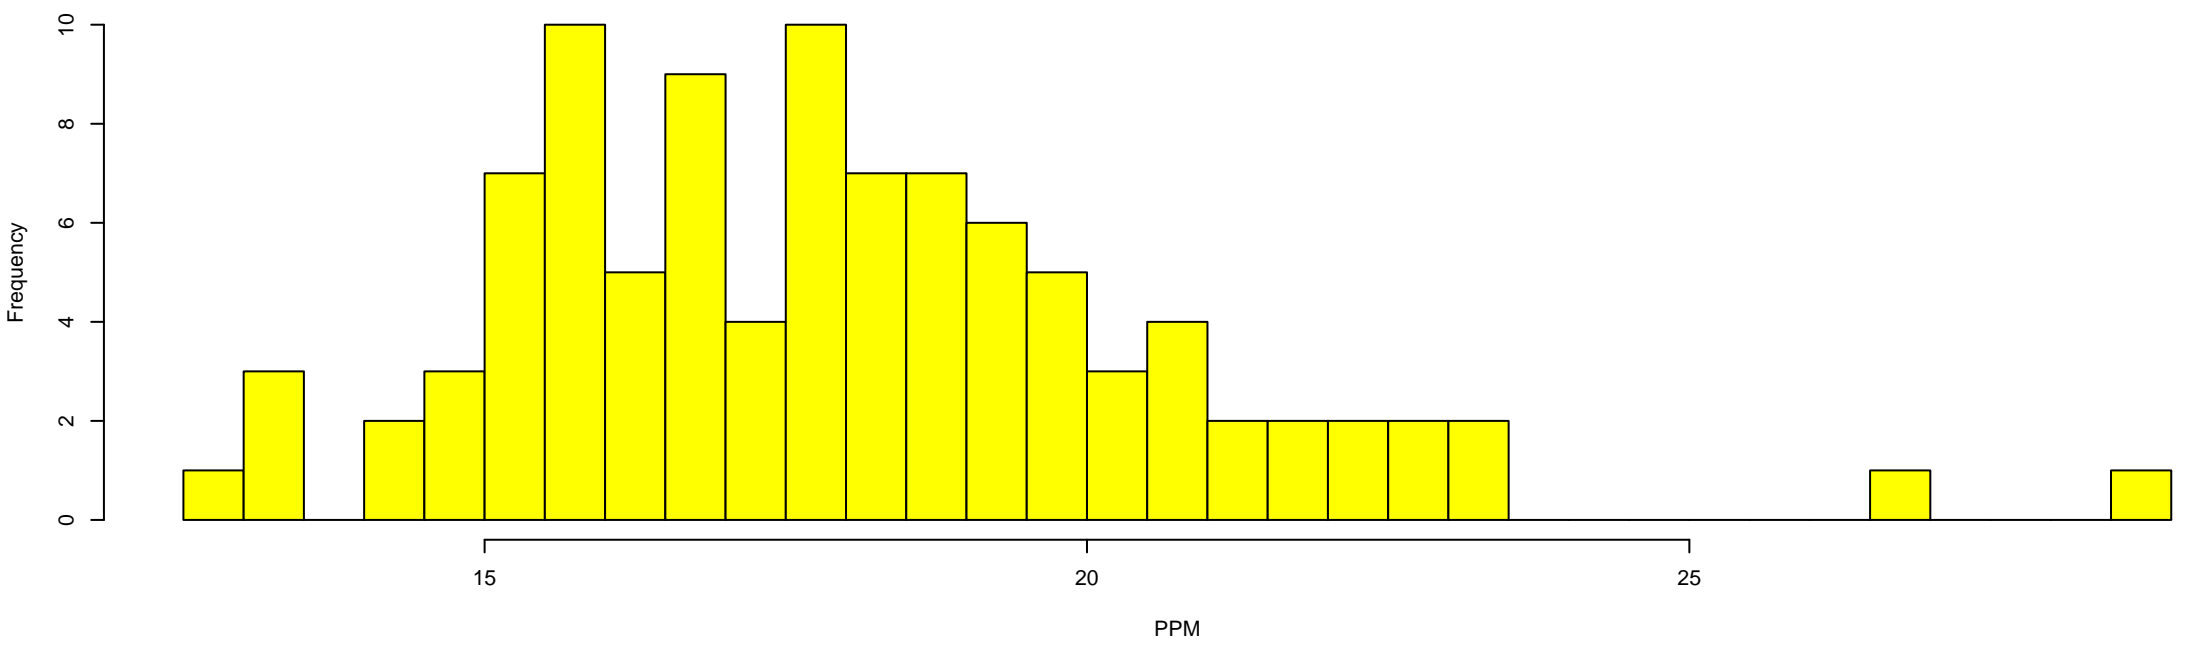

Seed Se

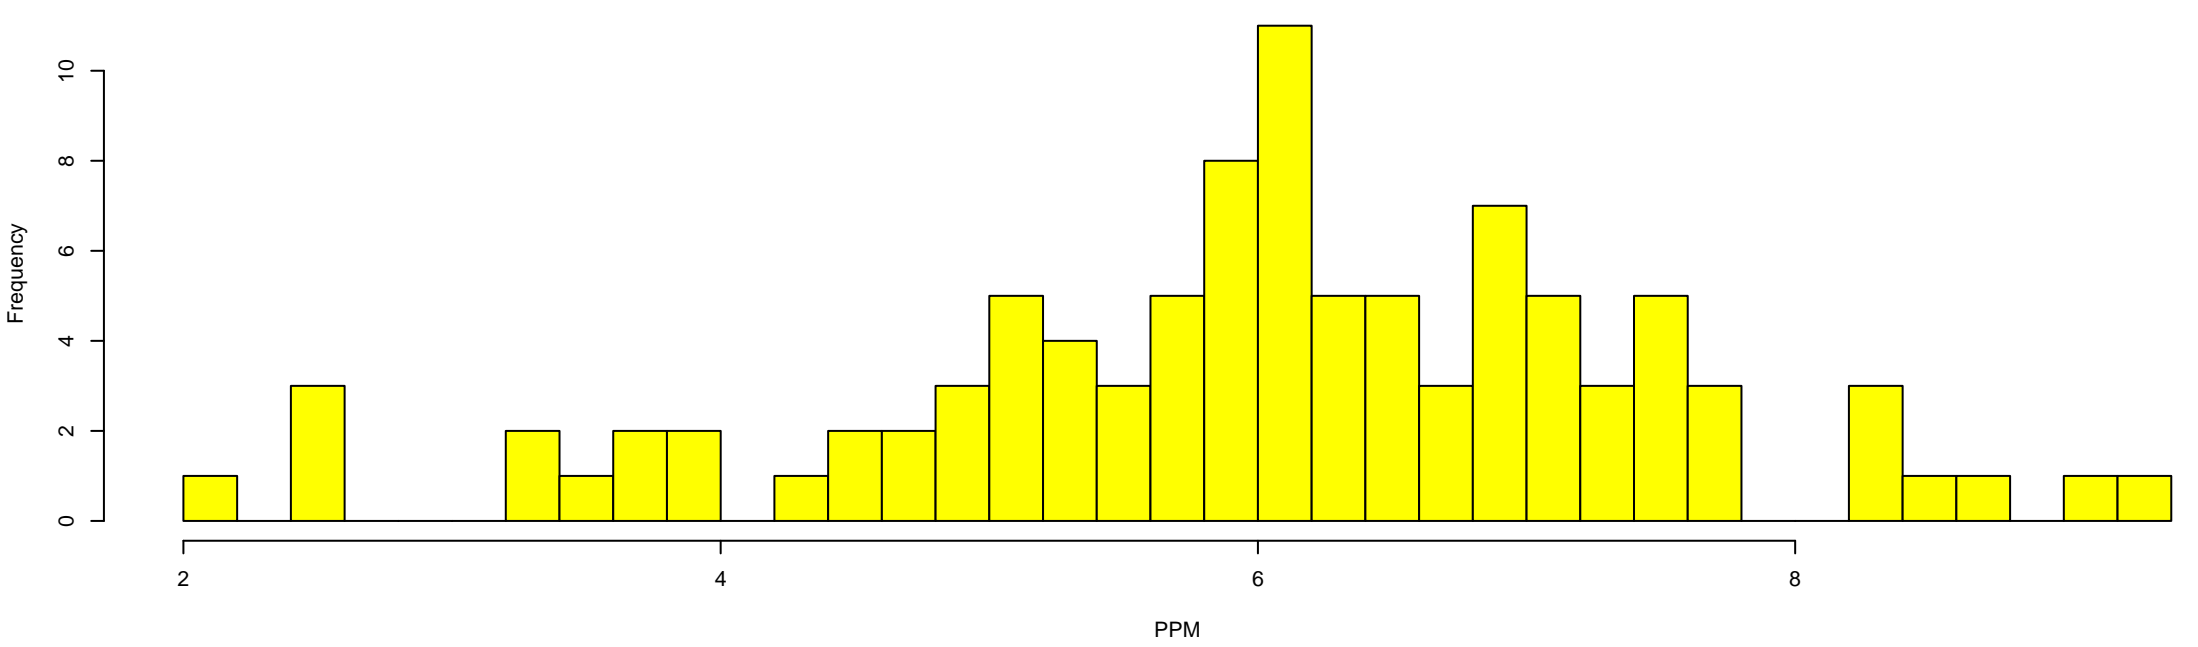



Hydro Root Rb

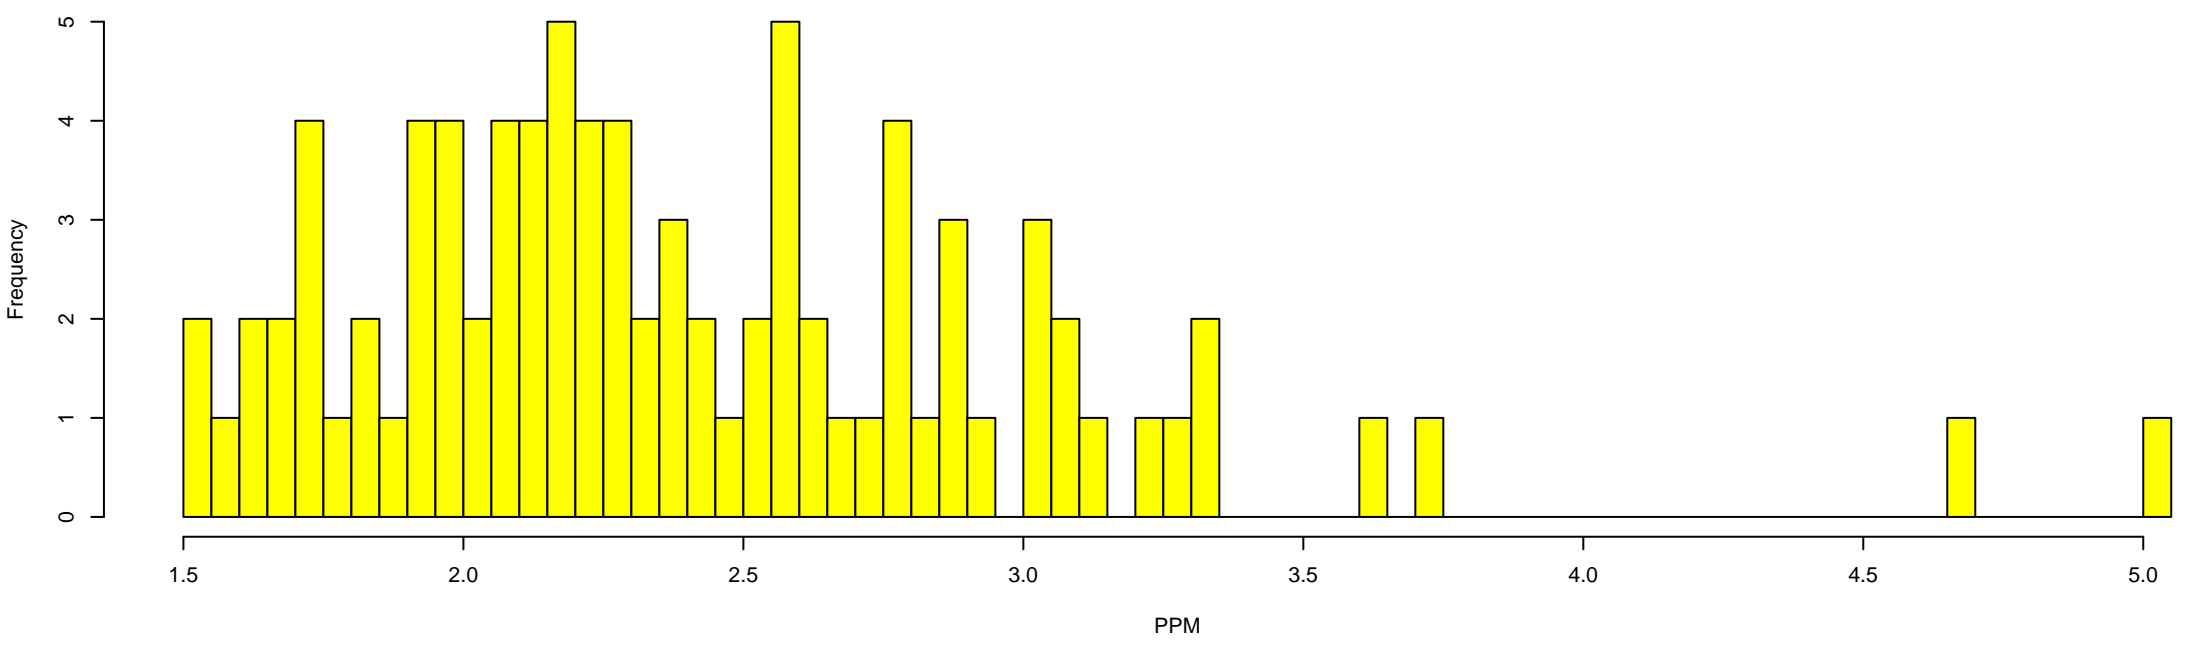

Hydro Shoot Rb

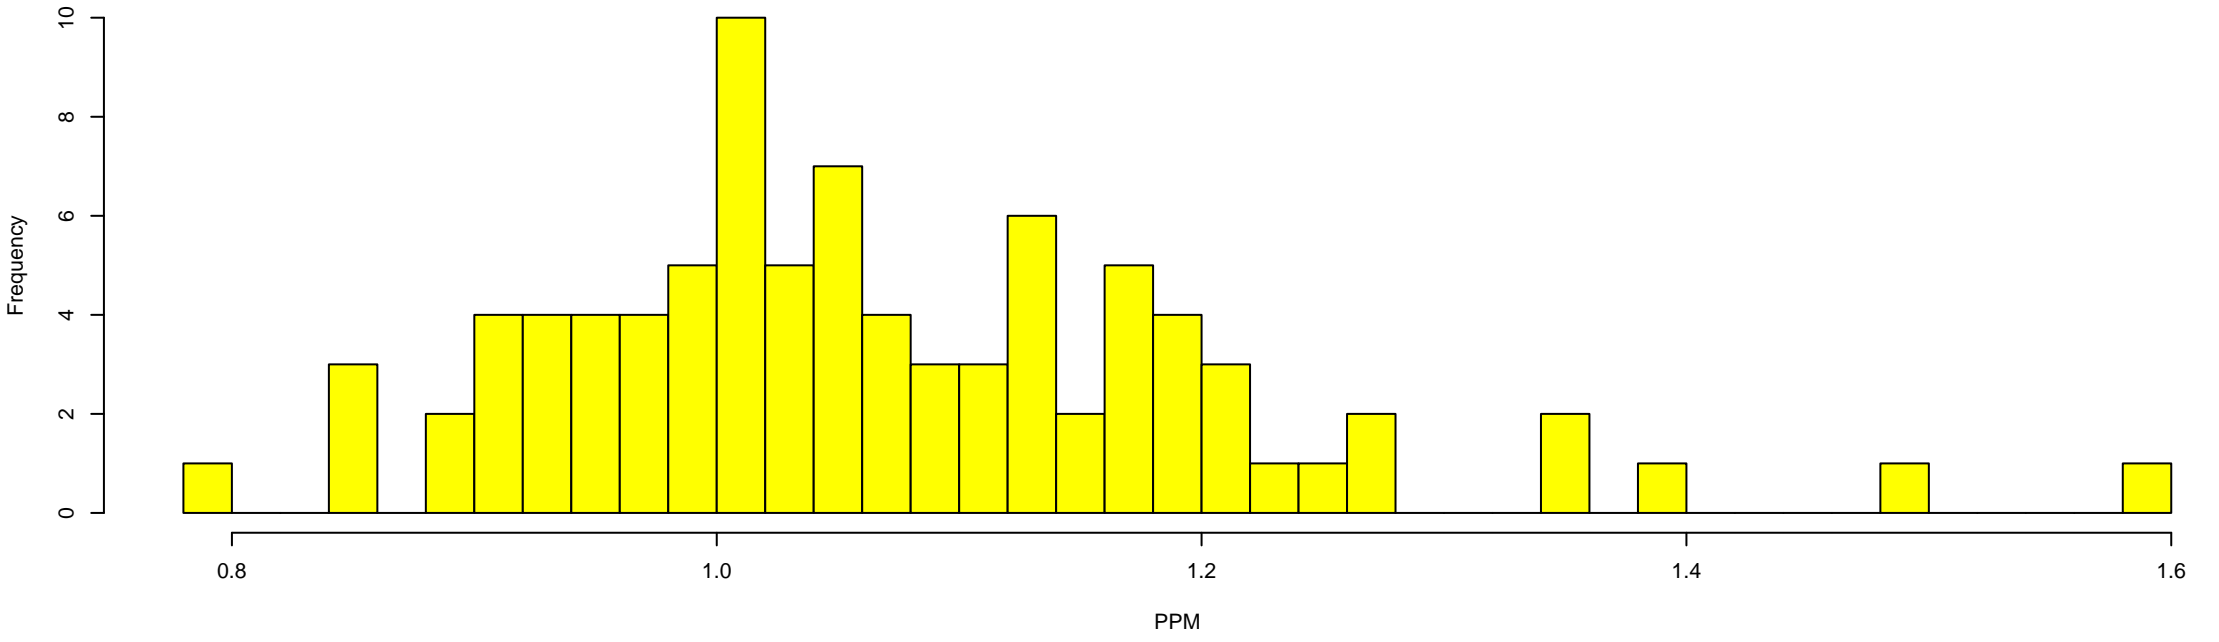

2nd Soil Shoot Rb

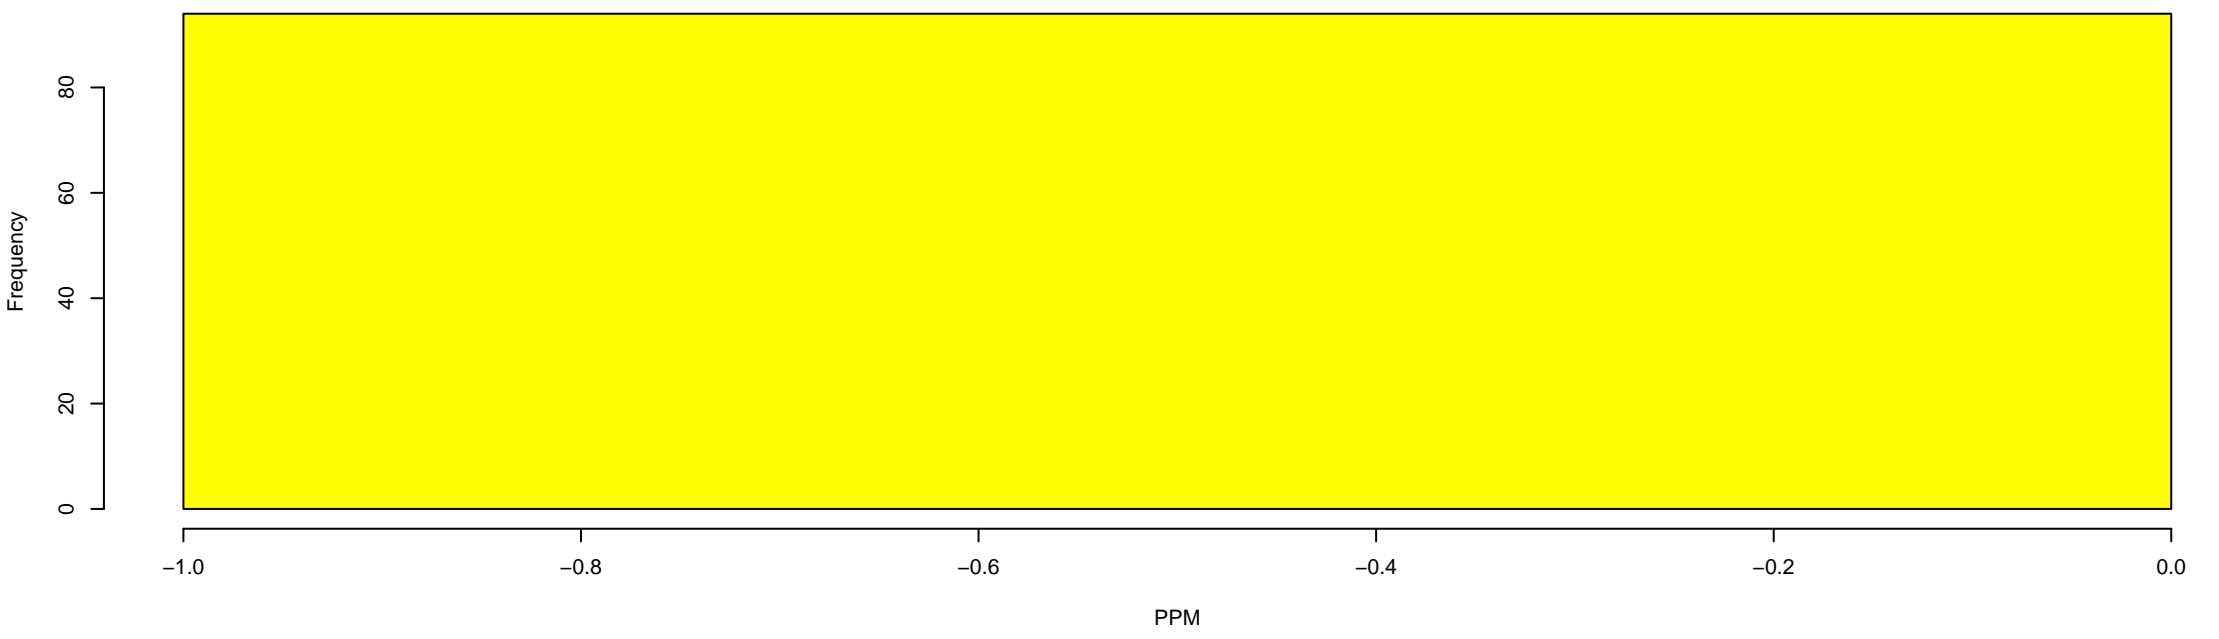

1st Soil Shoot Rb

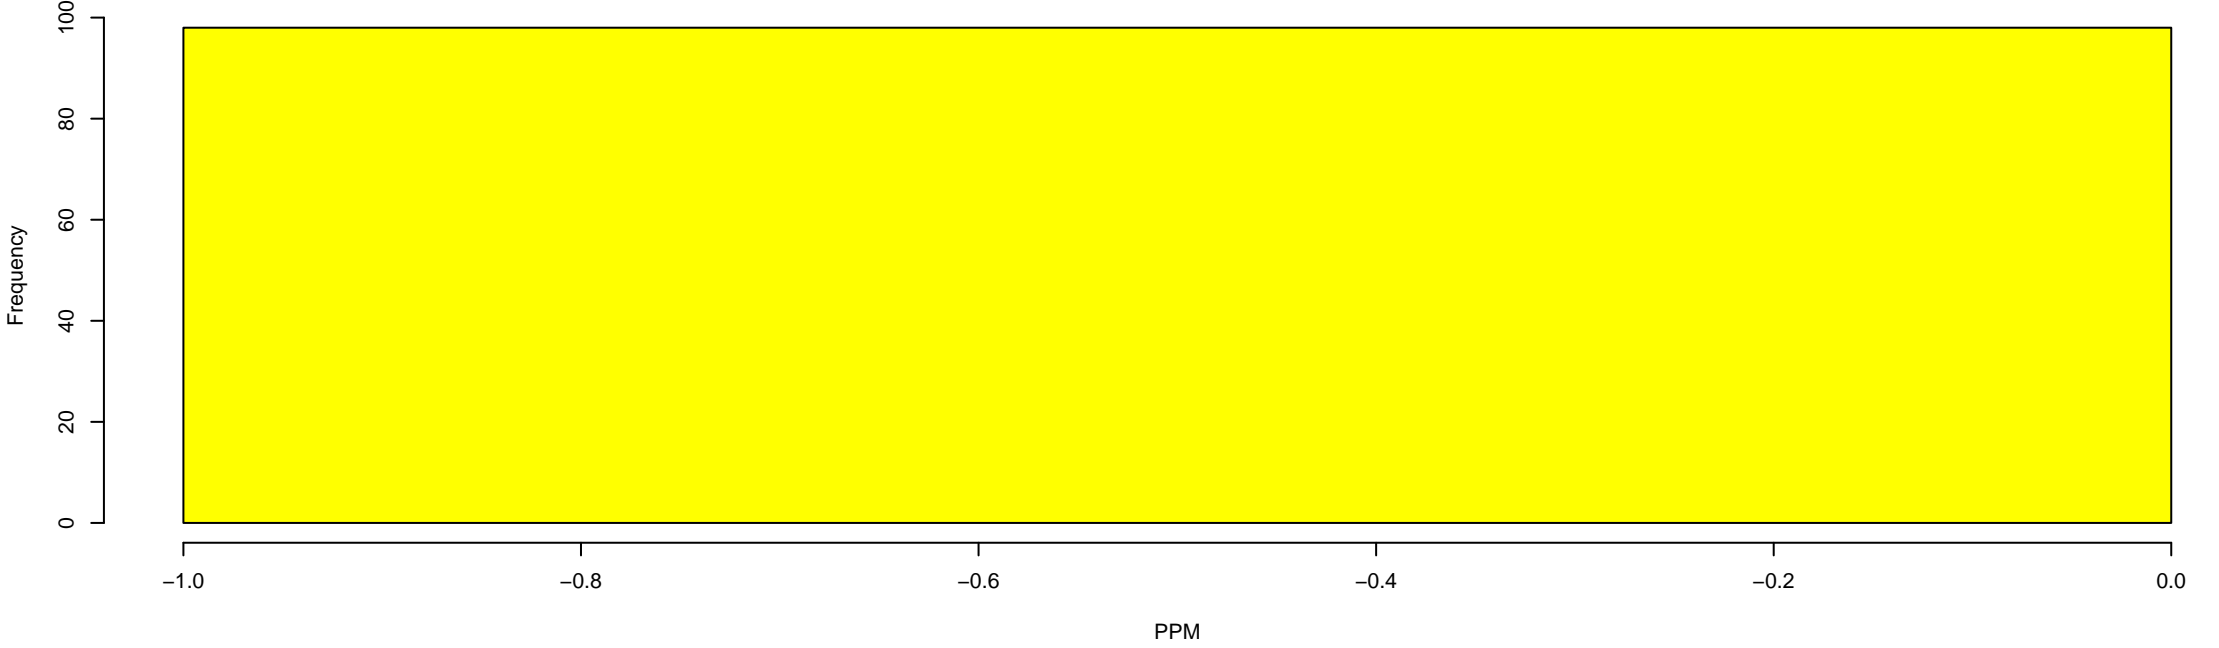

Seed Rb

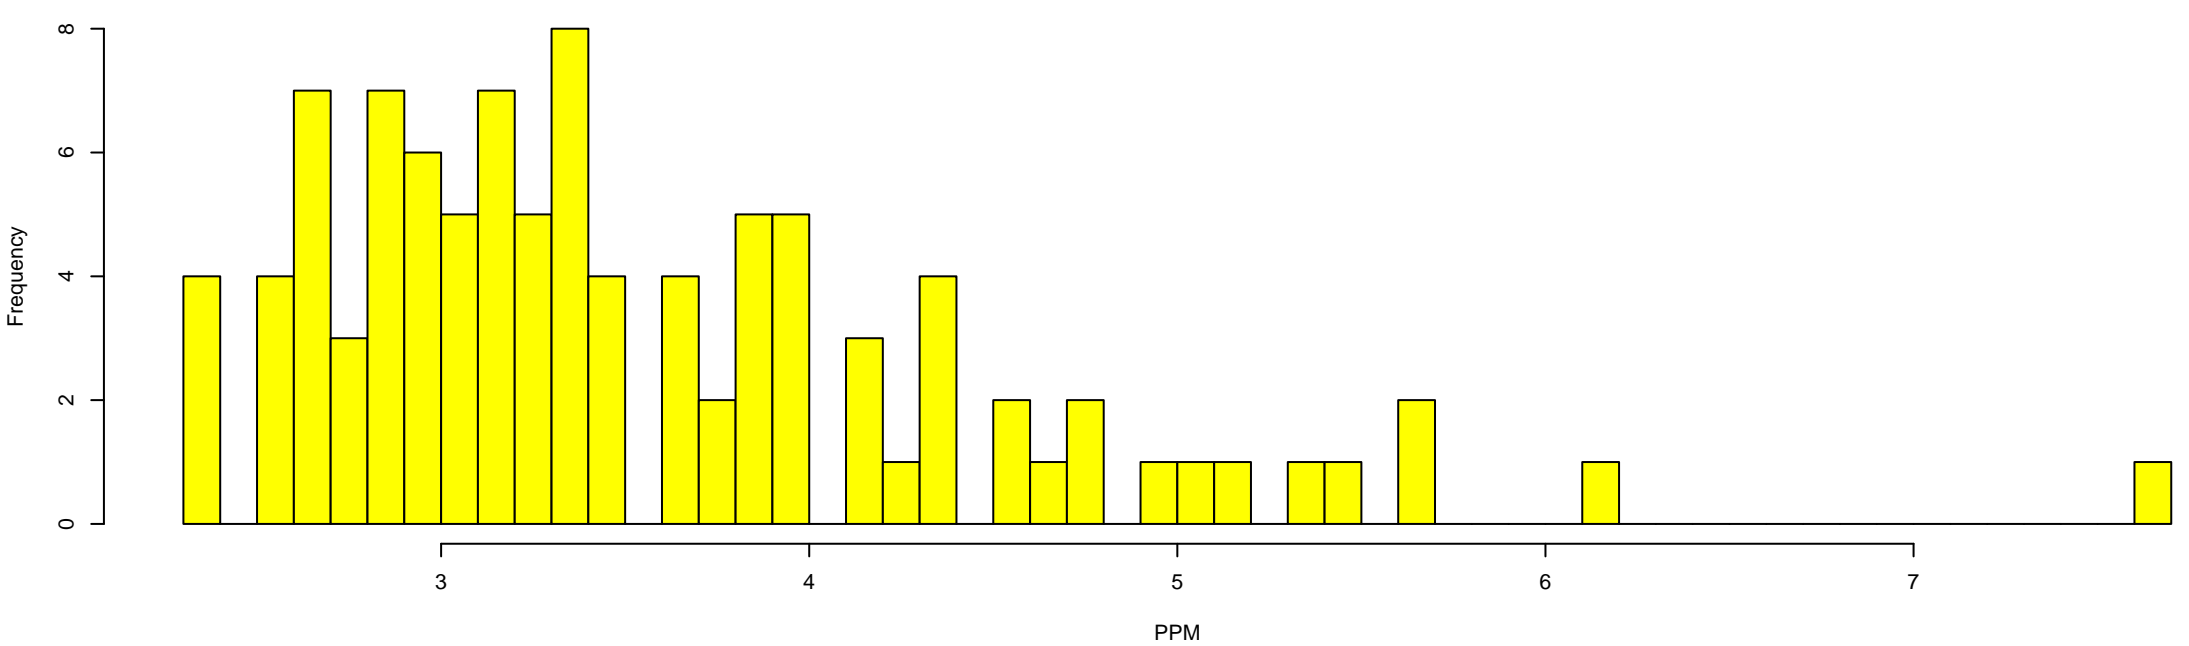

Hydro Root Mo

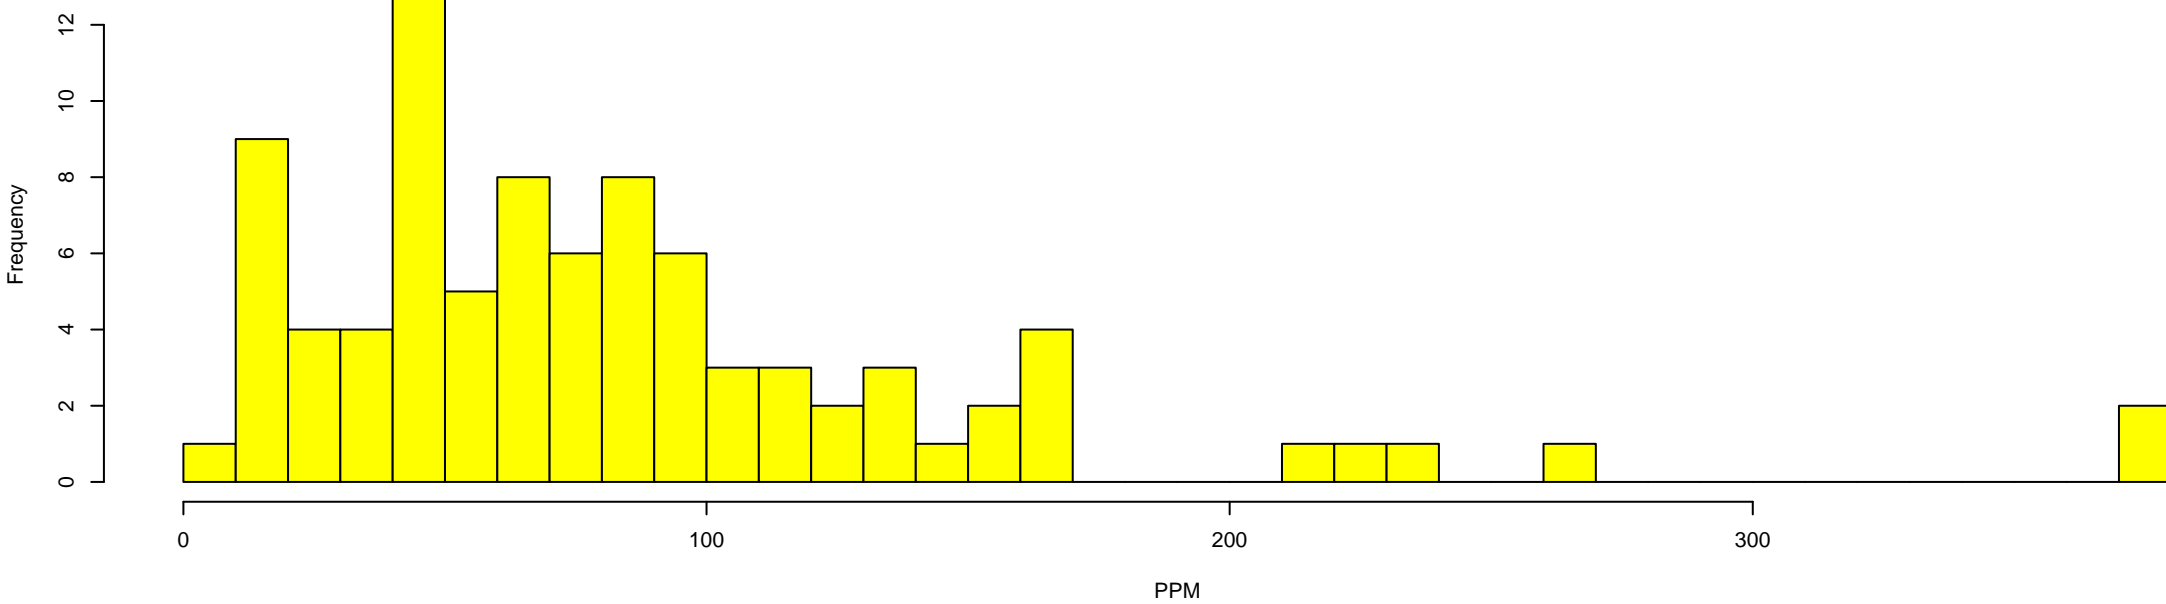

Hydro Shoot Mo

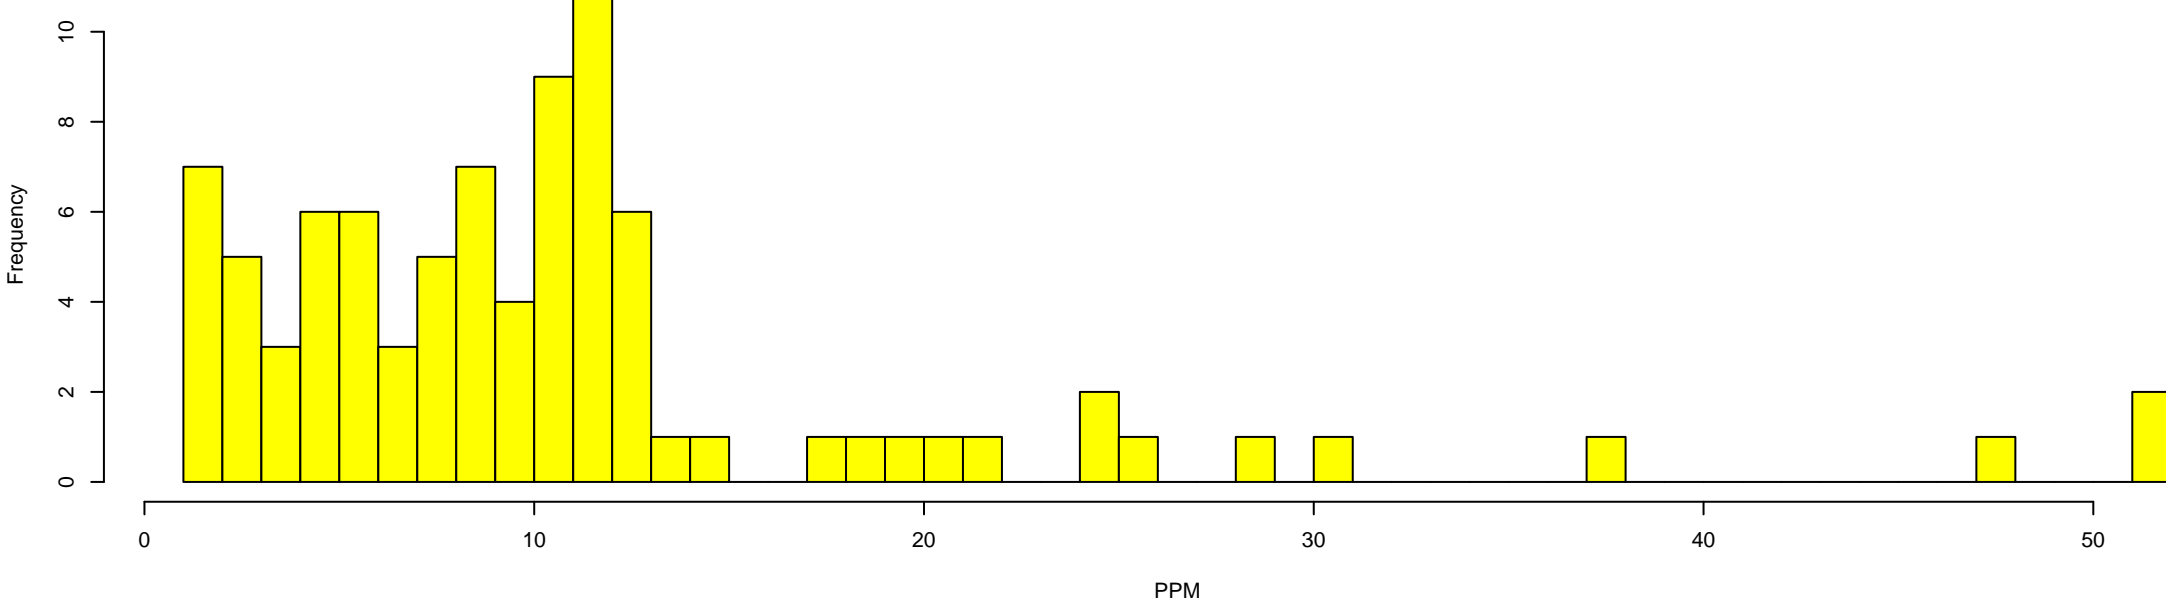

2nd Soil Shoot Mo

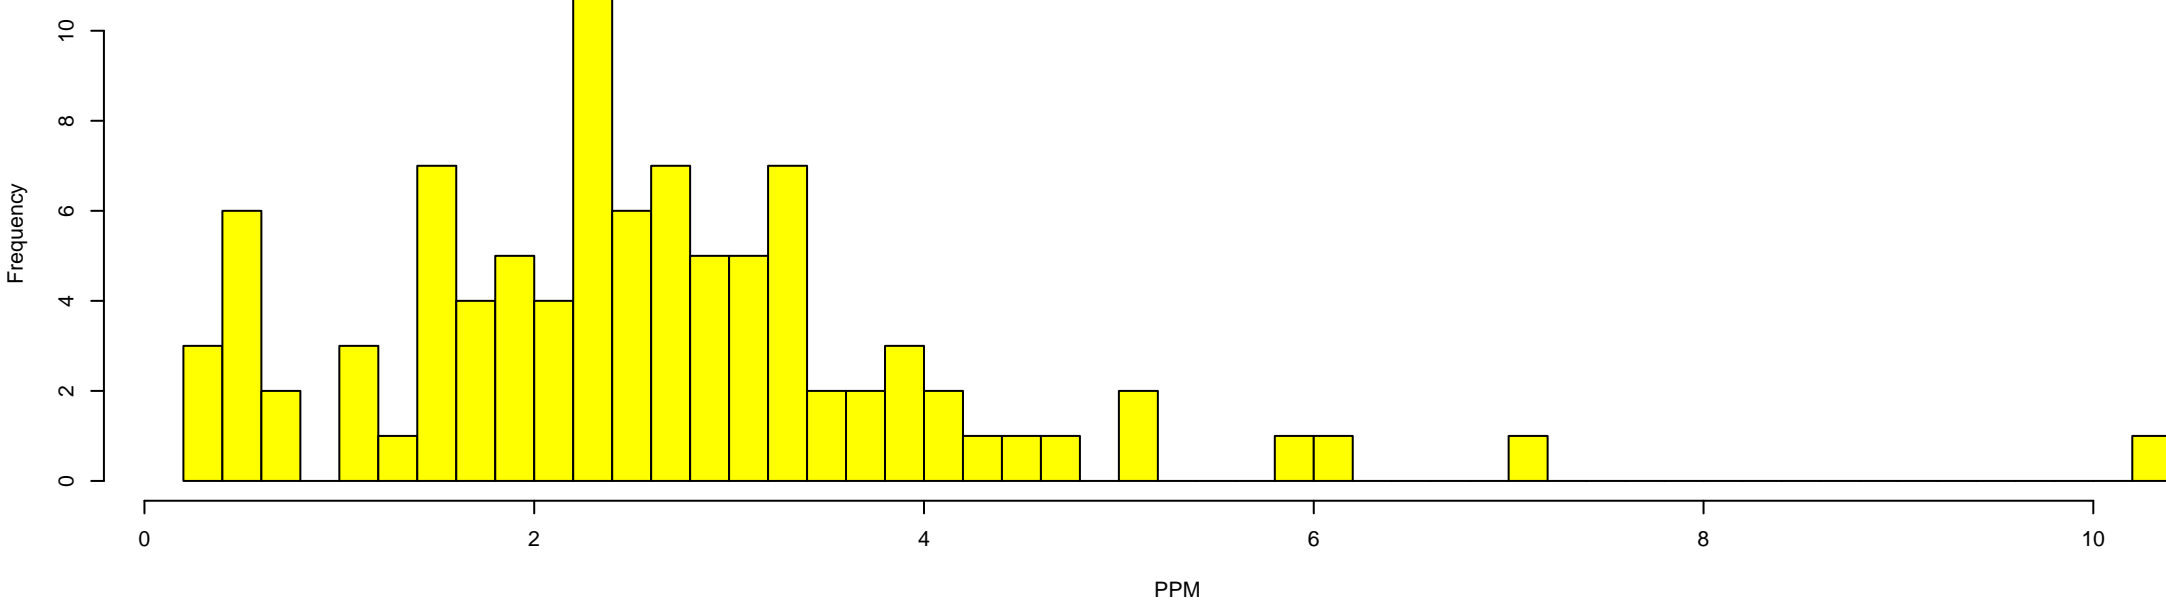

1st Soil Shoot Mo

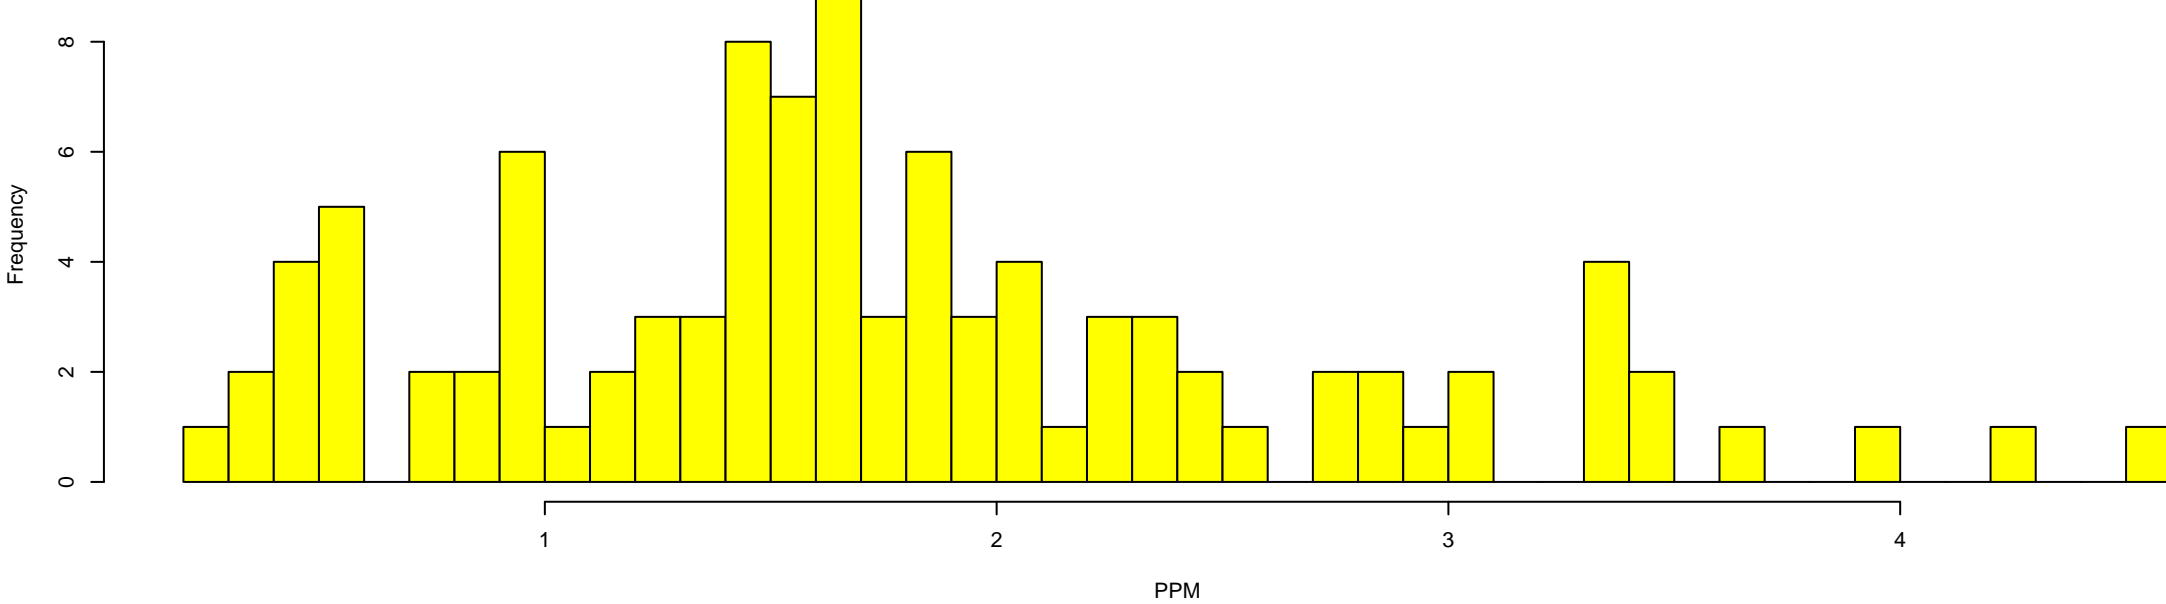

Seed Mo

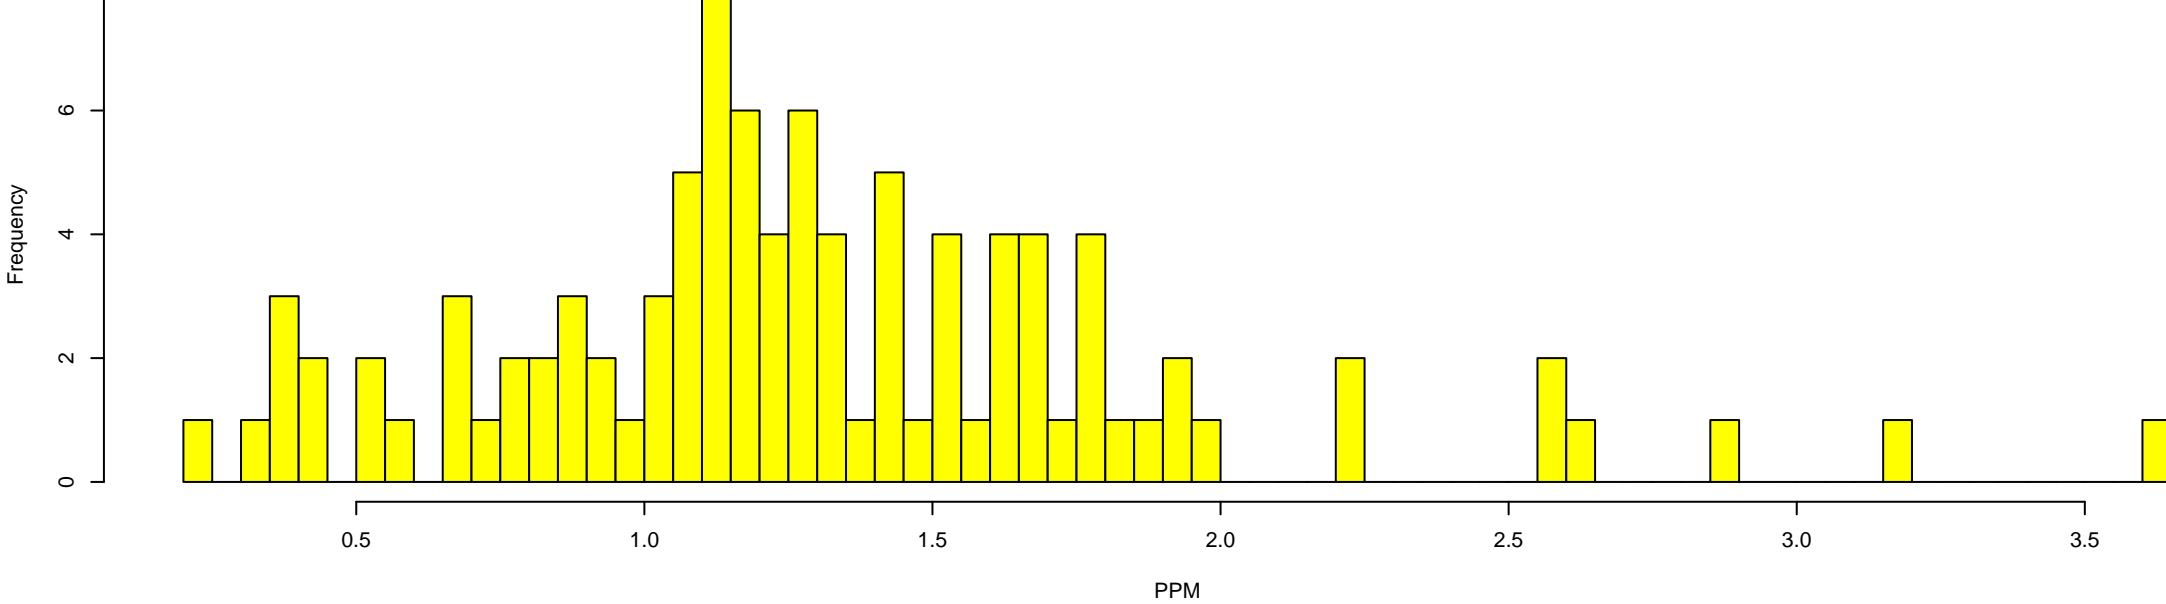

Hydro Root Cd

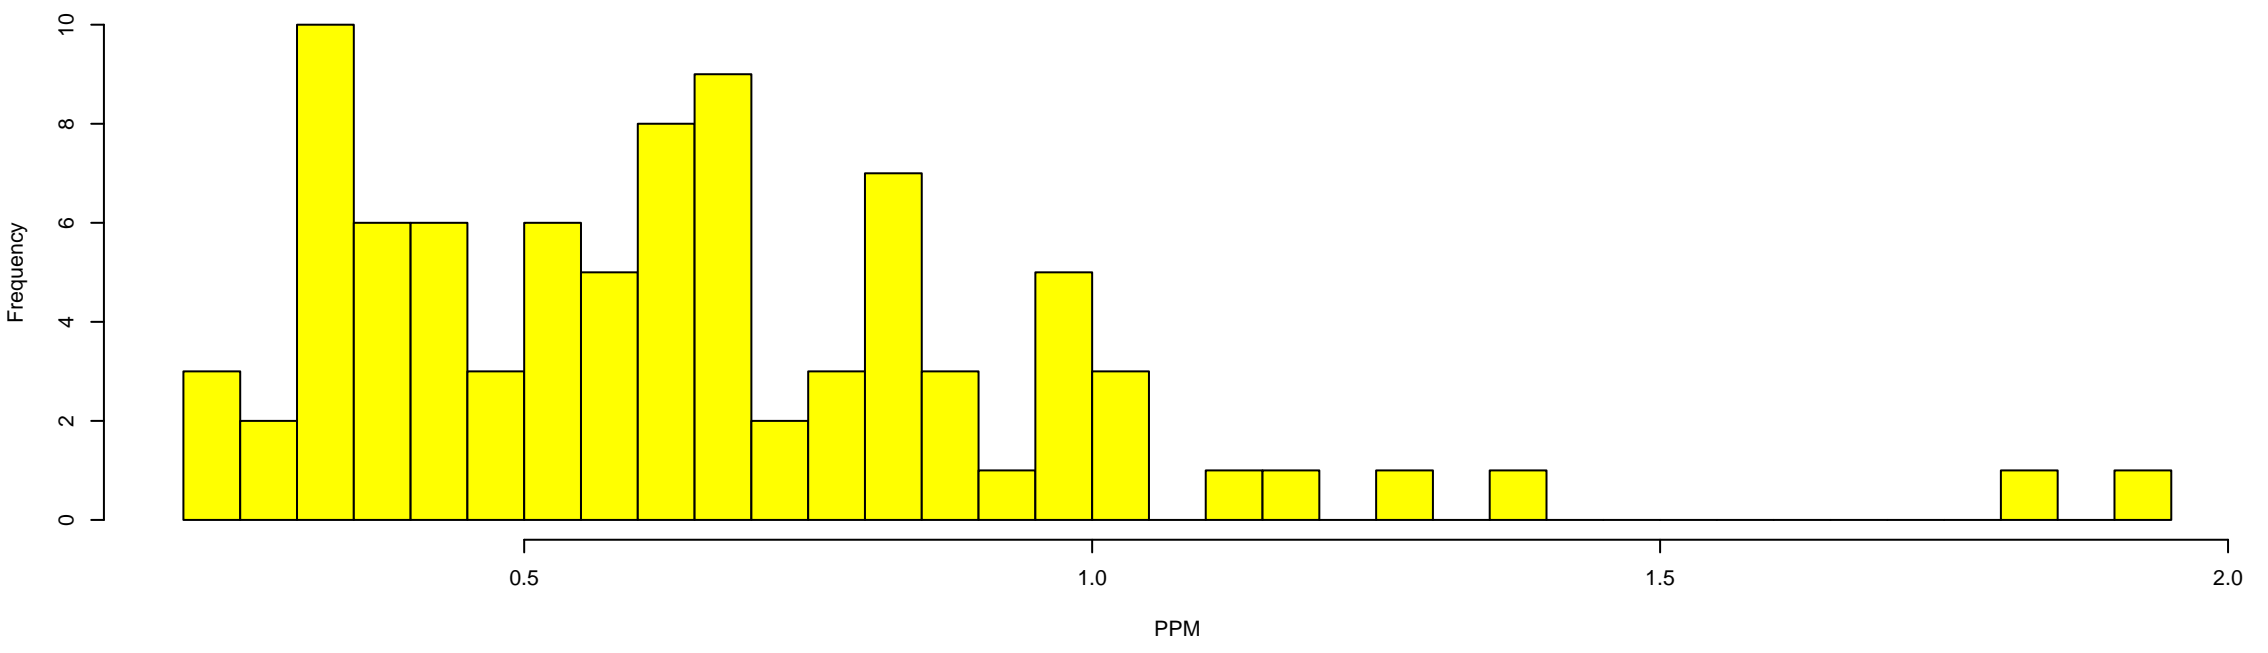

Hydro Shoot Cd

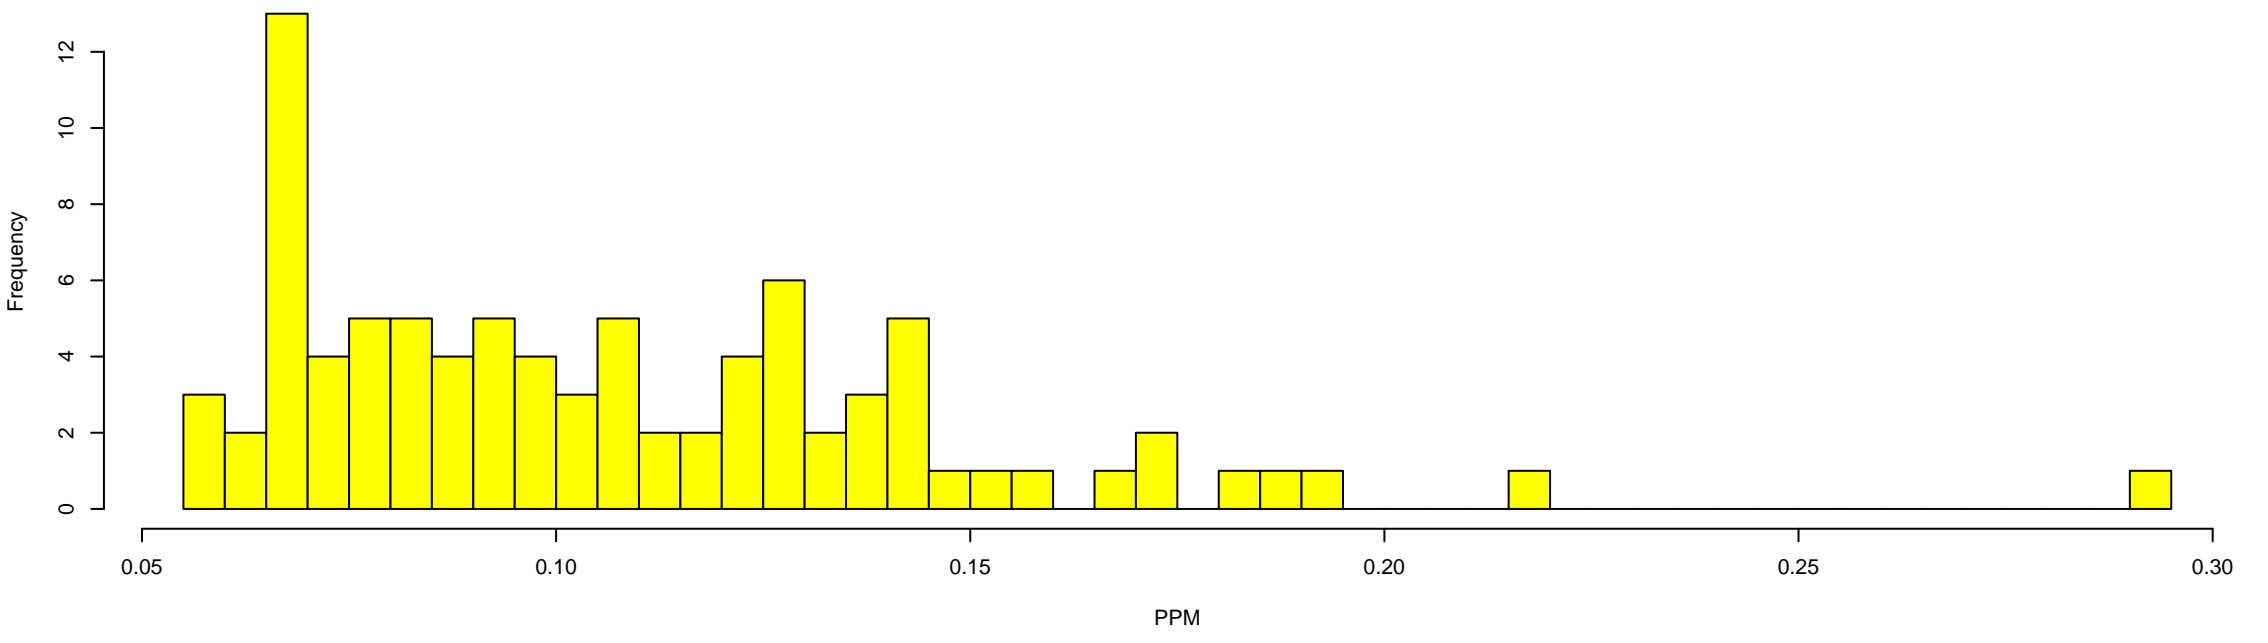

2nd Soil Shoot Cd

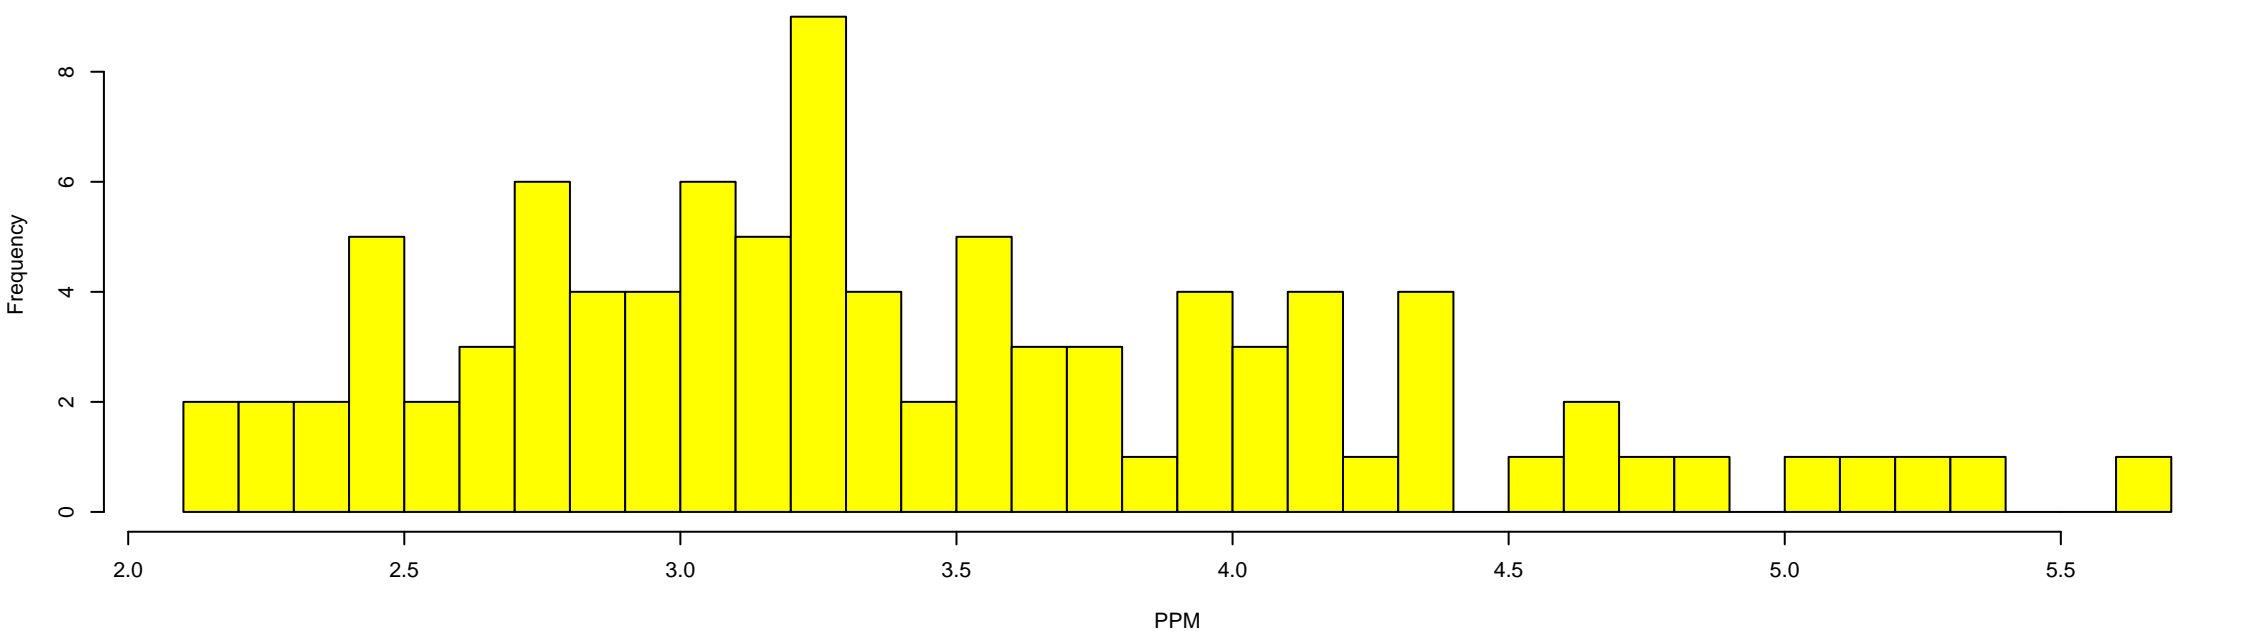

1st Soil Shoot Cd

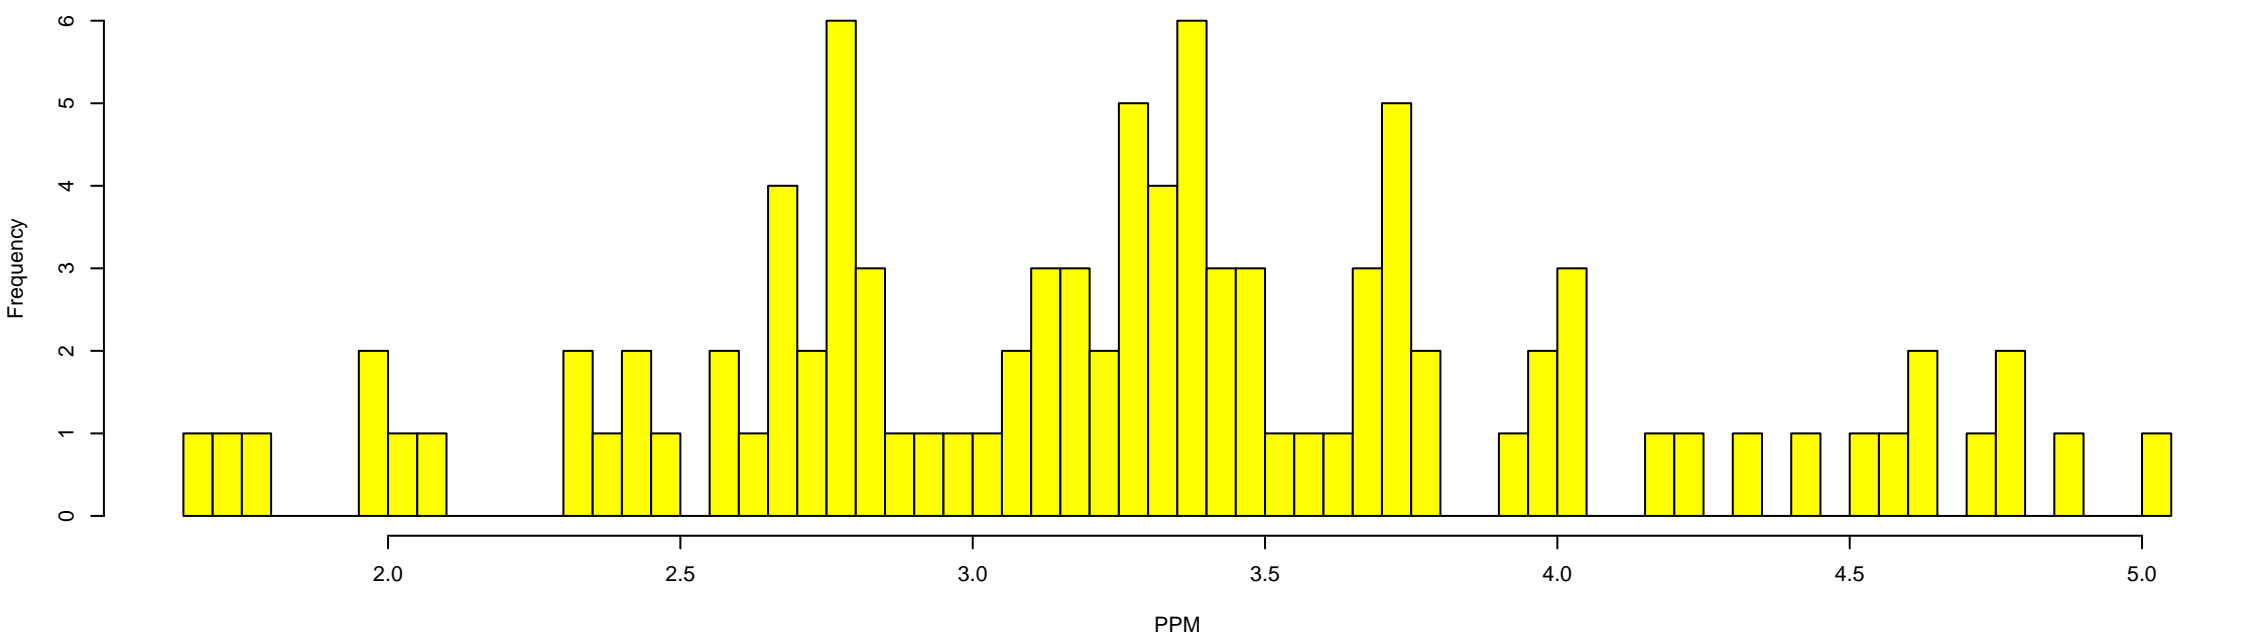

Seed Cd

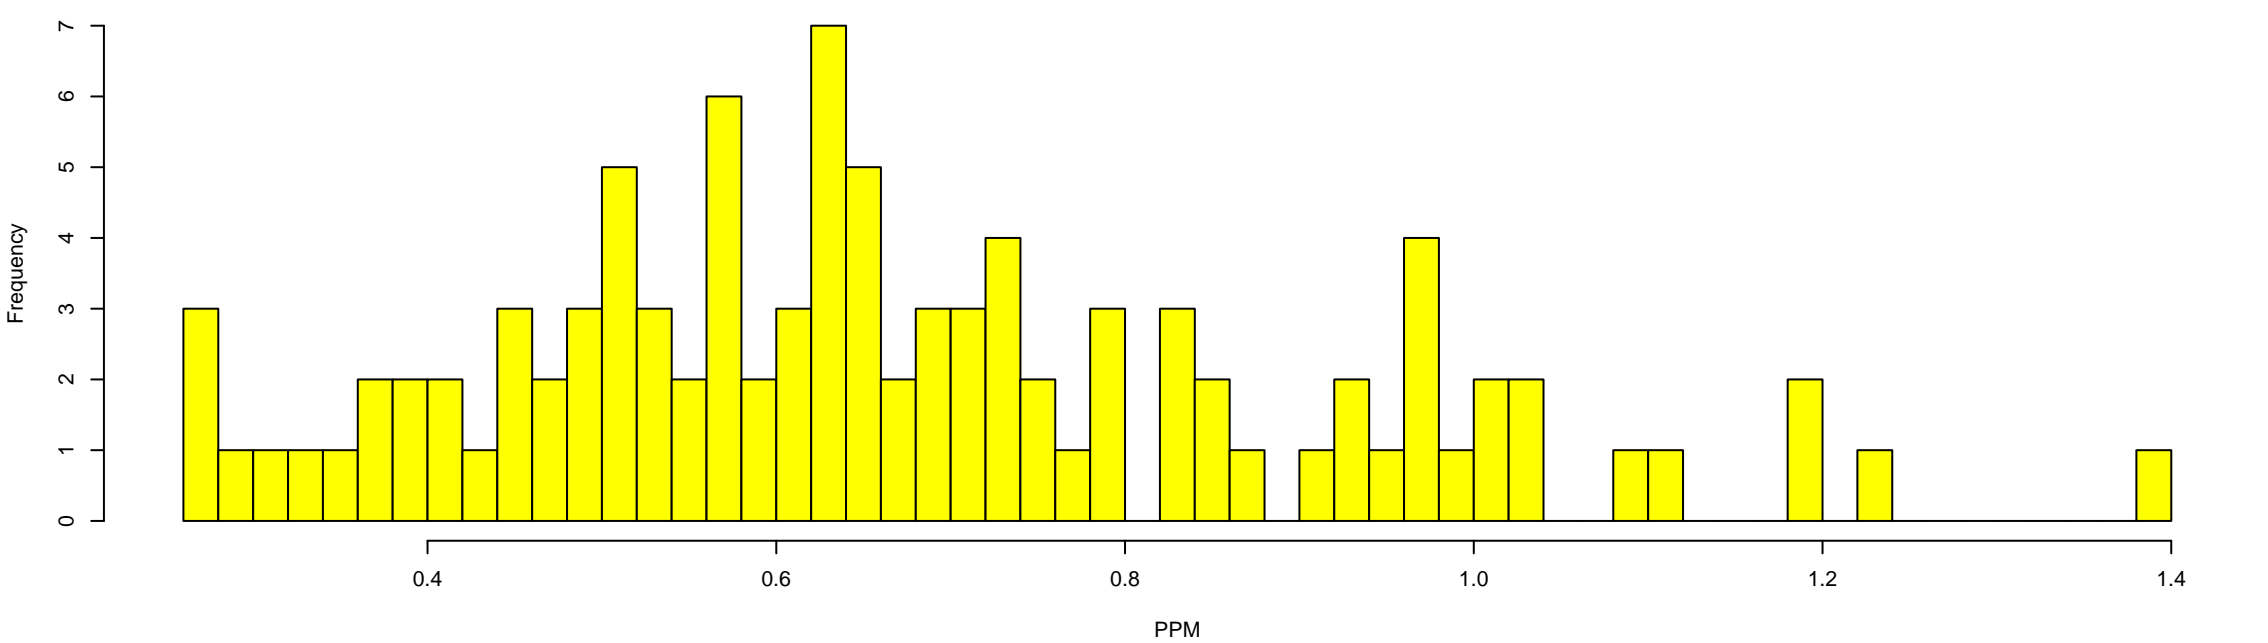

Supplement: pone.0035121.s003.pdf [file pone.0035121.s003.pdf]
