# Supplementary material for: Biodiversity of Mineral Nutrient and Trace Element Accumulation in Arabidopsis thaliana
Source: PubMed Central journal article supplement (PMC3338729; doi:10.1371/journal.pone.0035121), 2012-04-27

# Li7

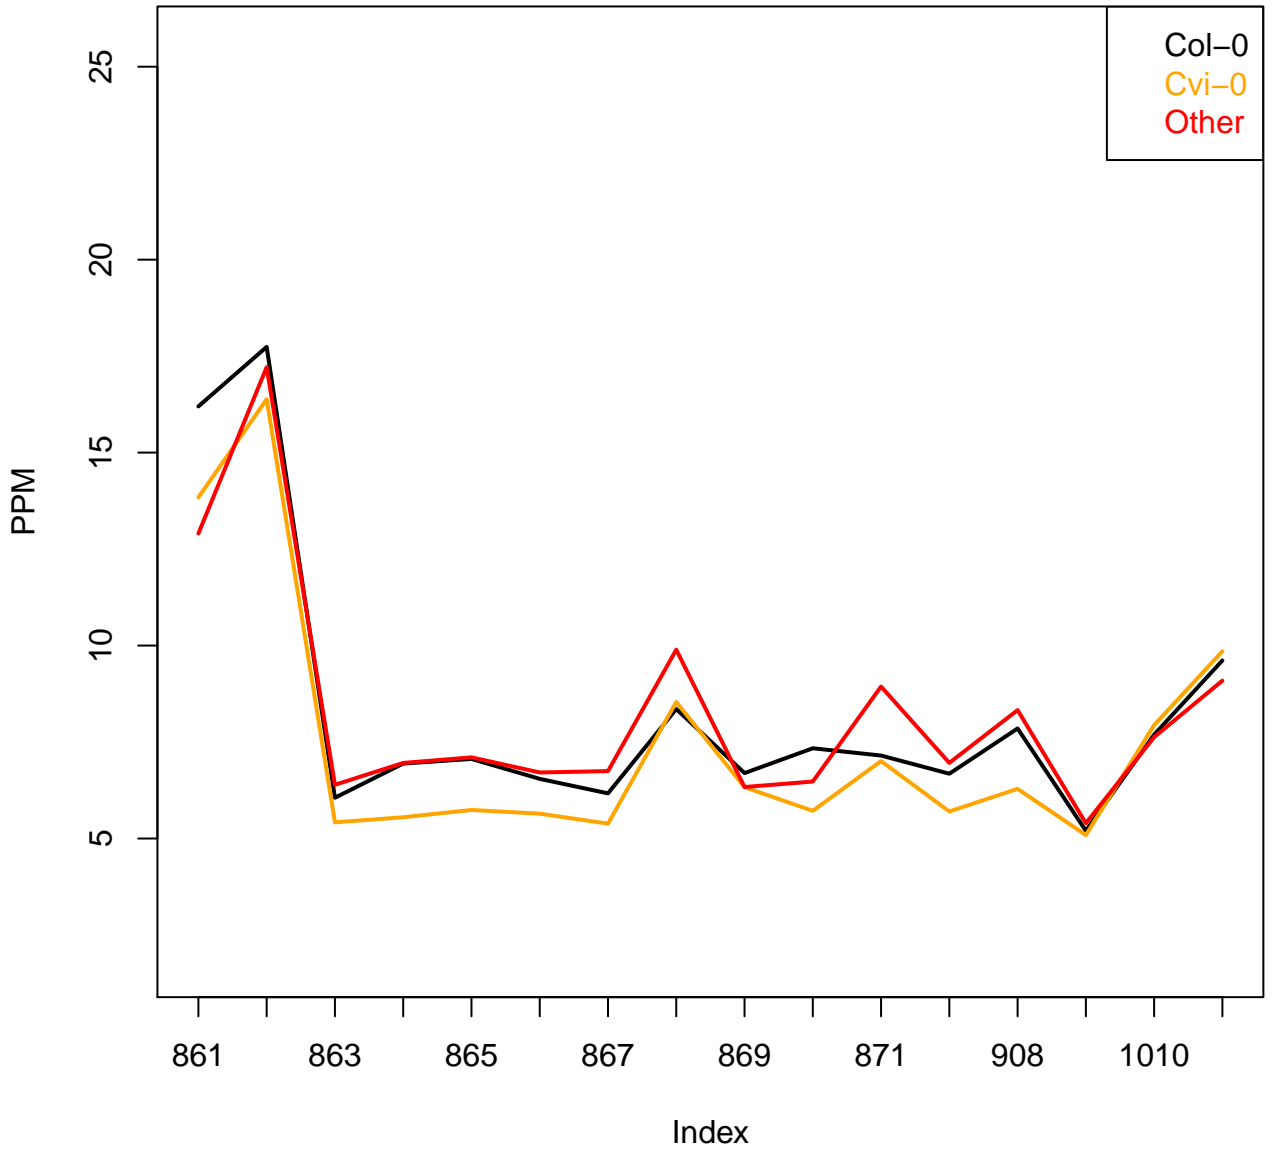

# B11

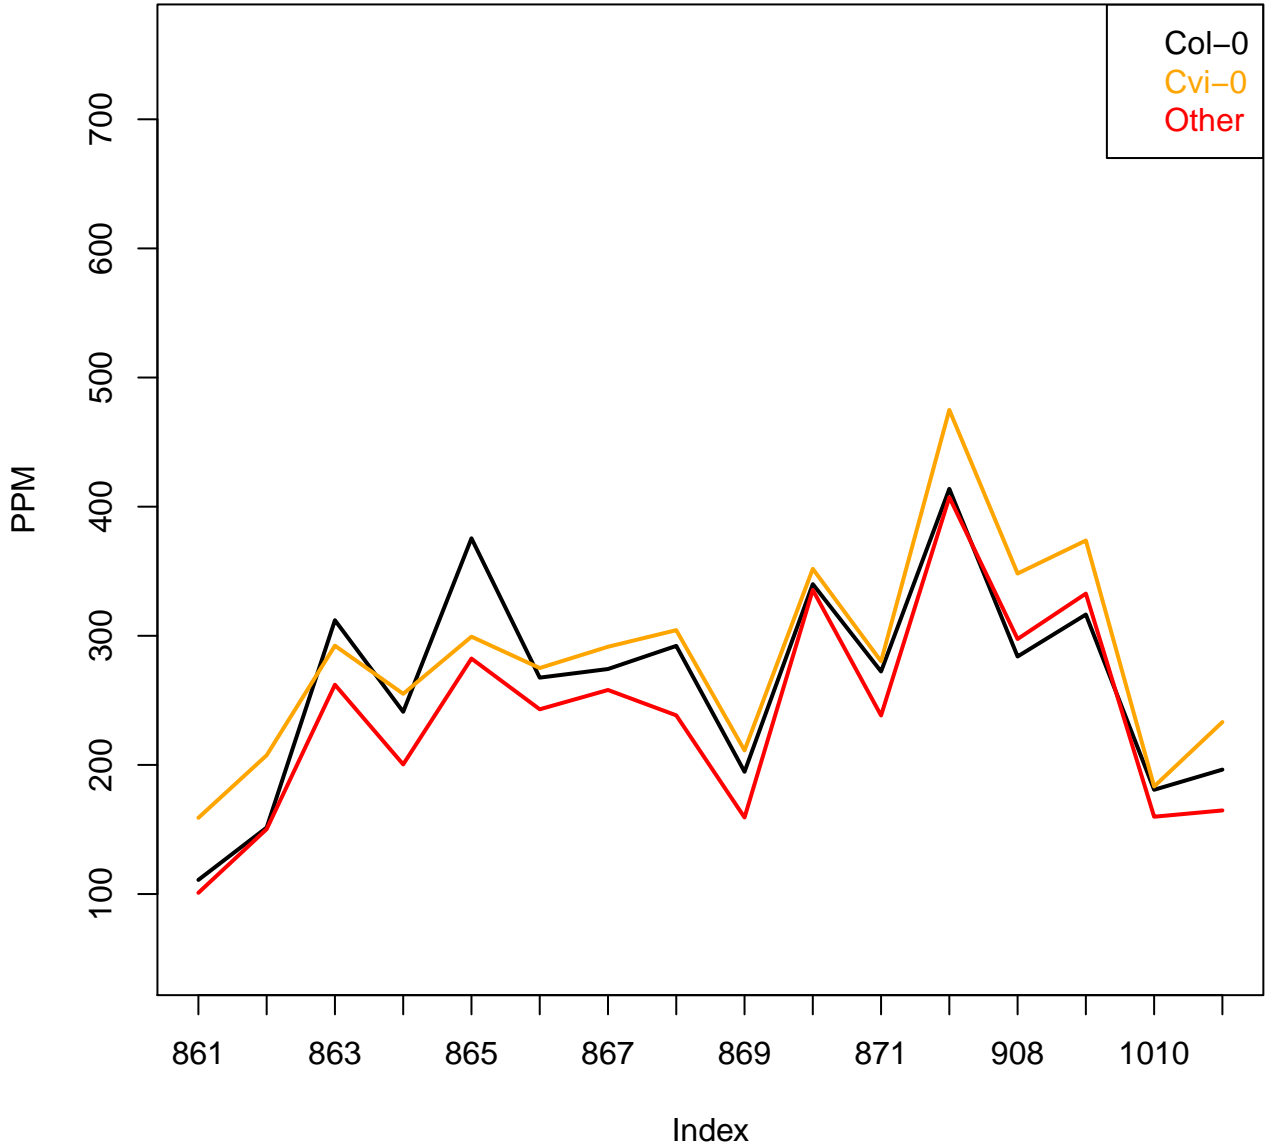

# Na23

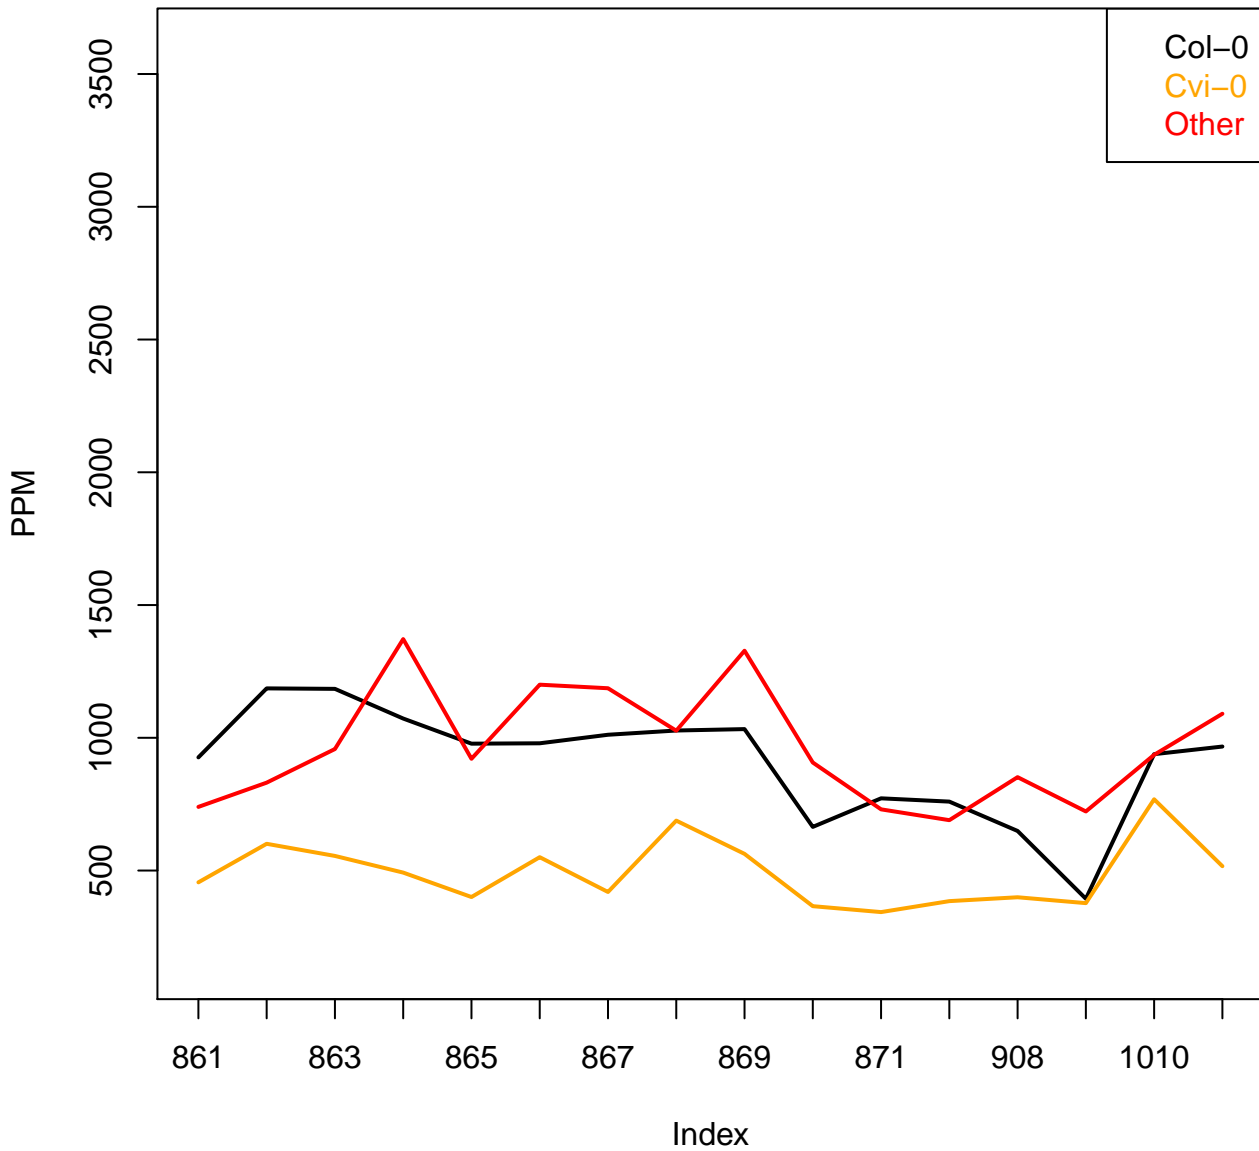

# Mg25

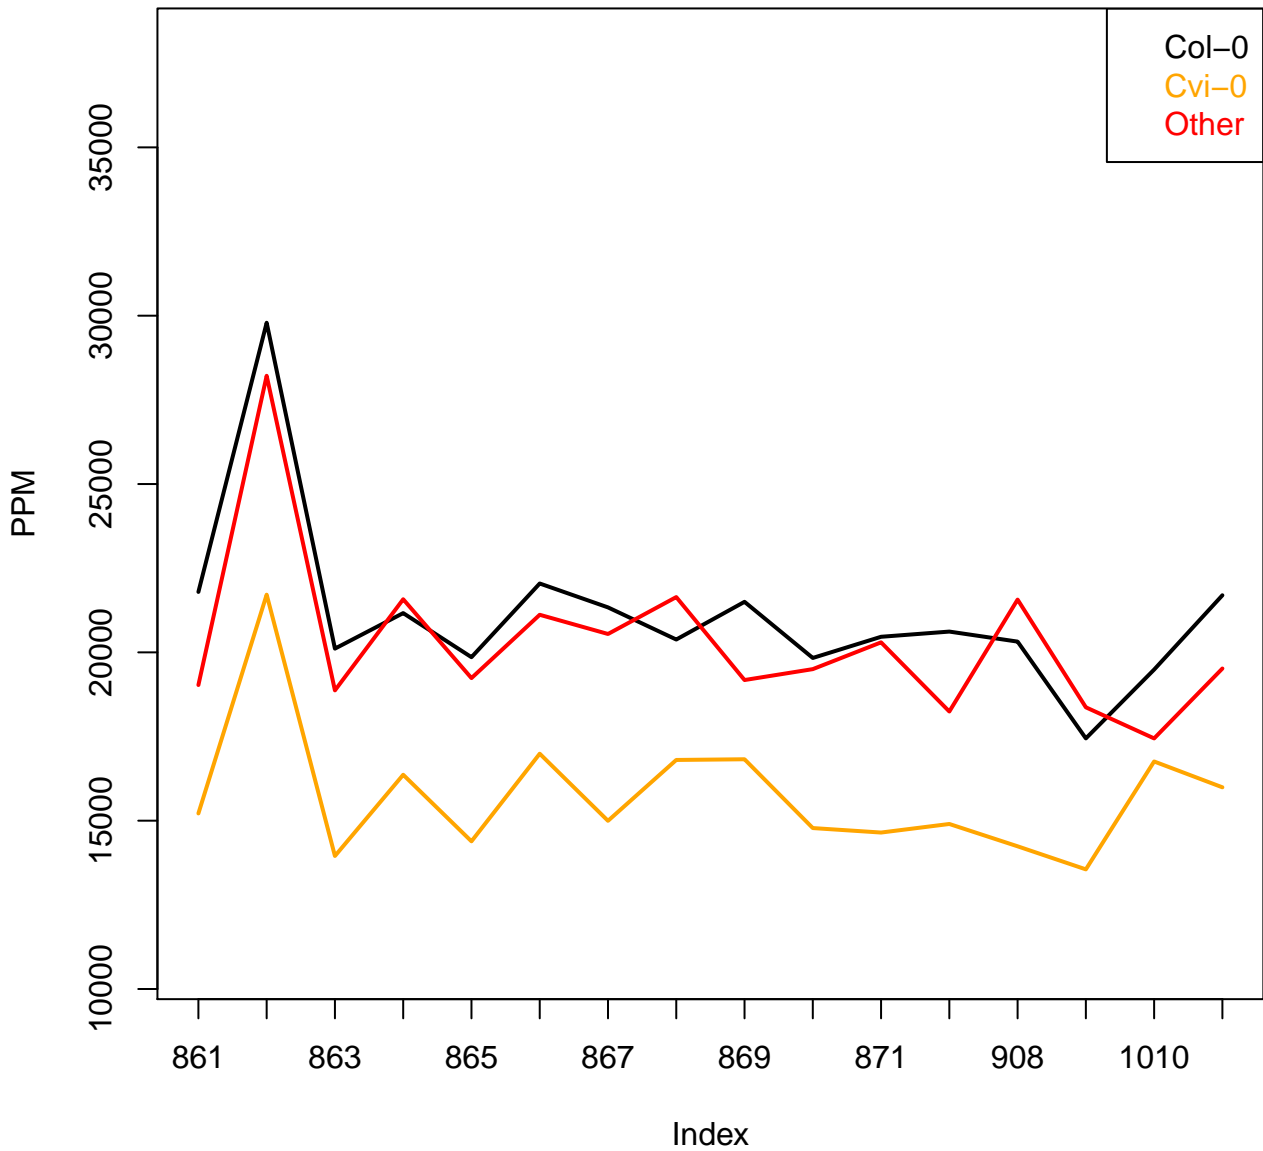

# P31

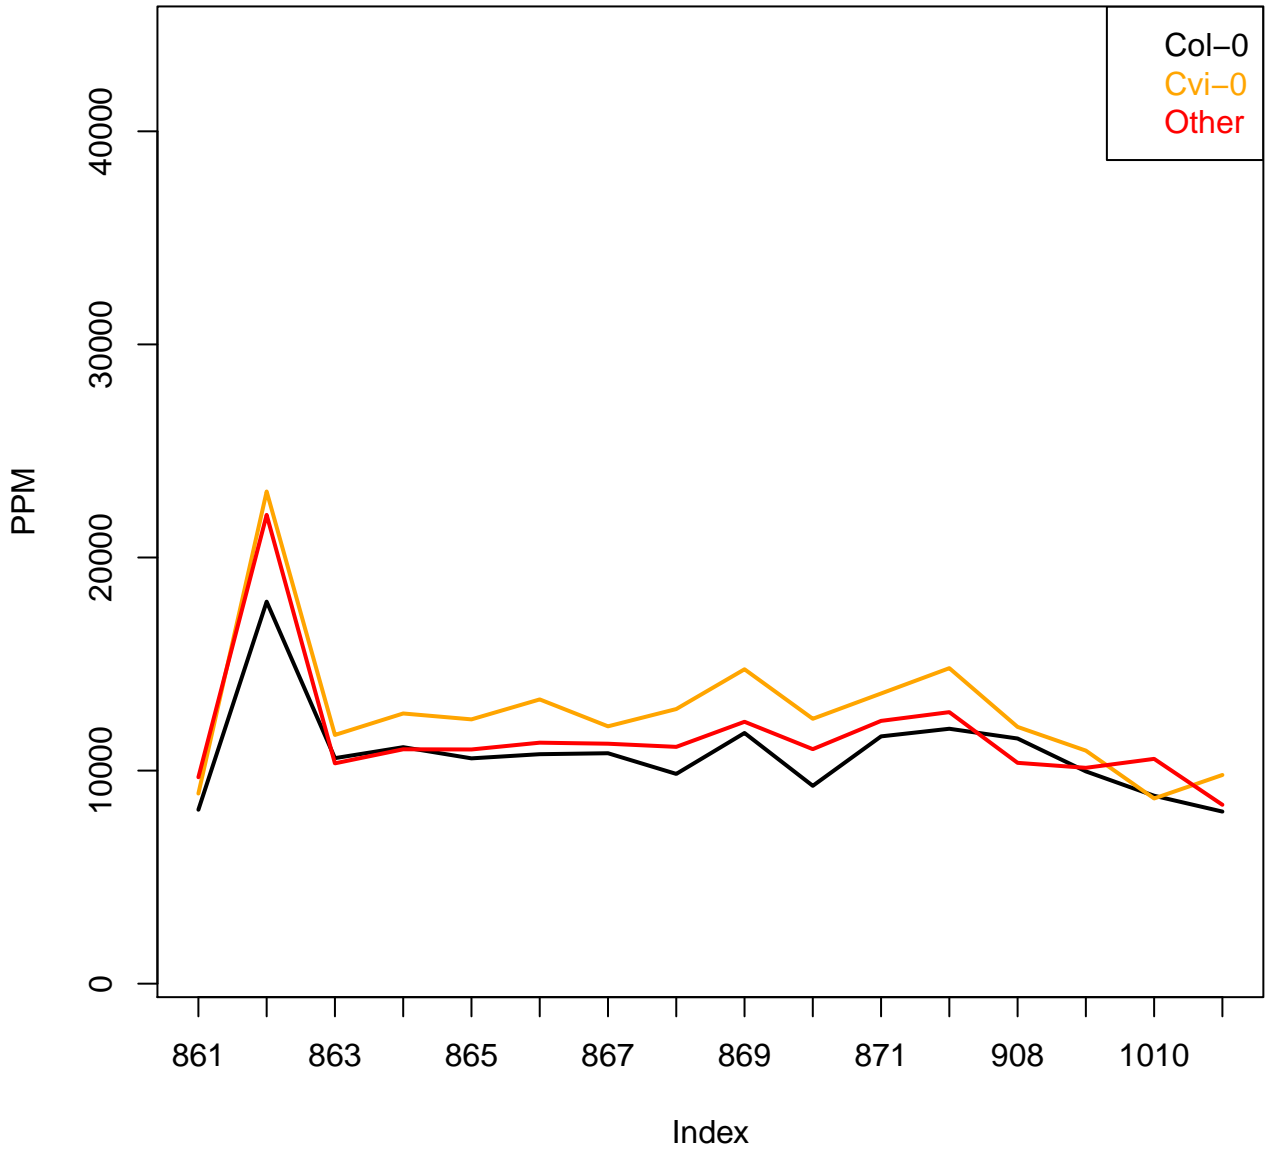

# K39

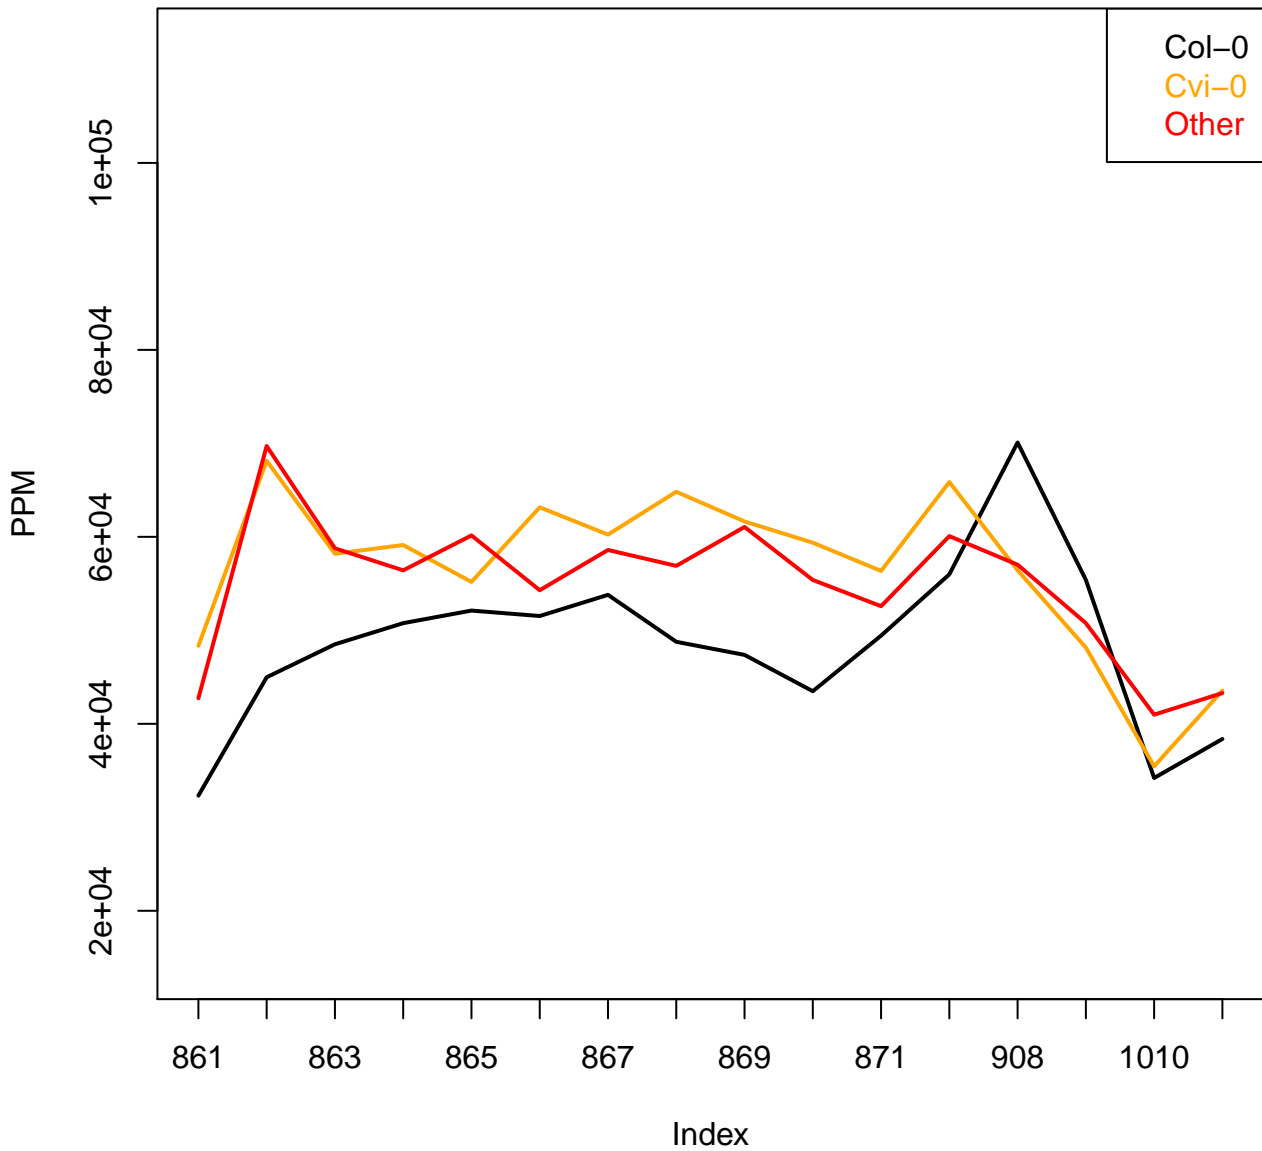

# Ca43

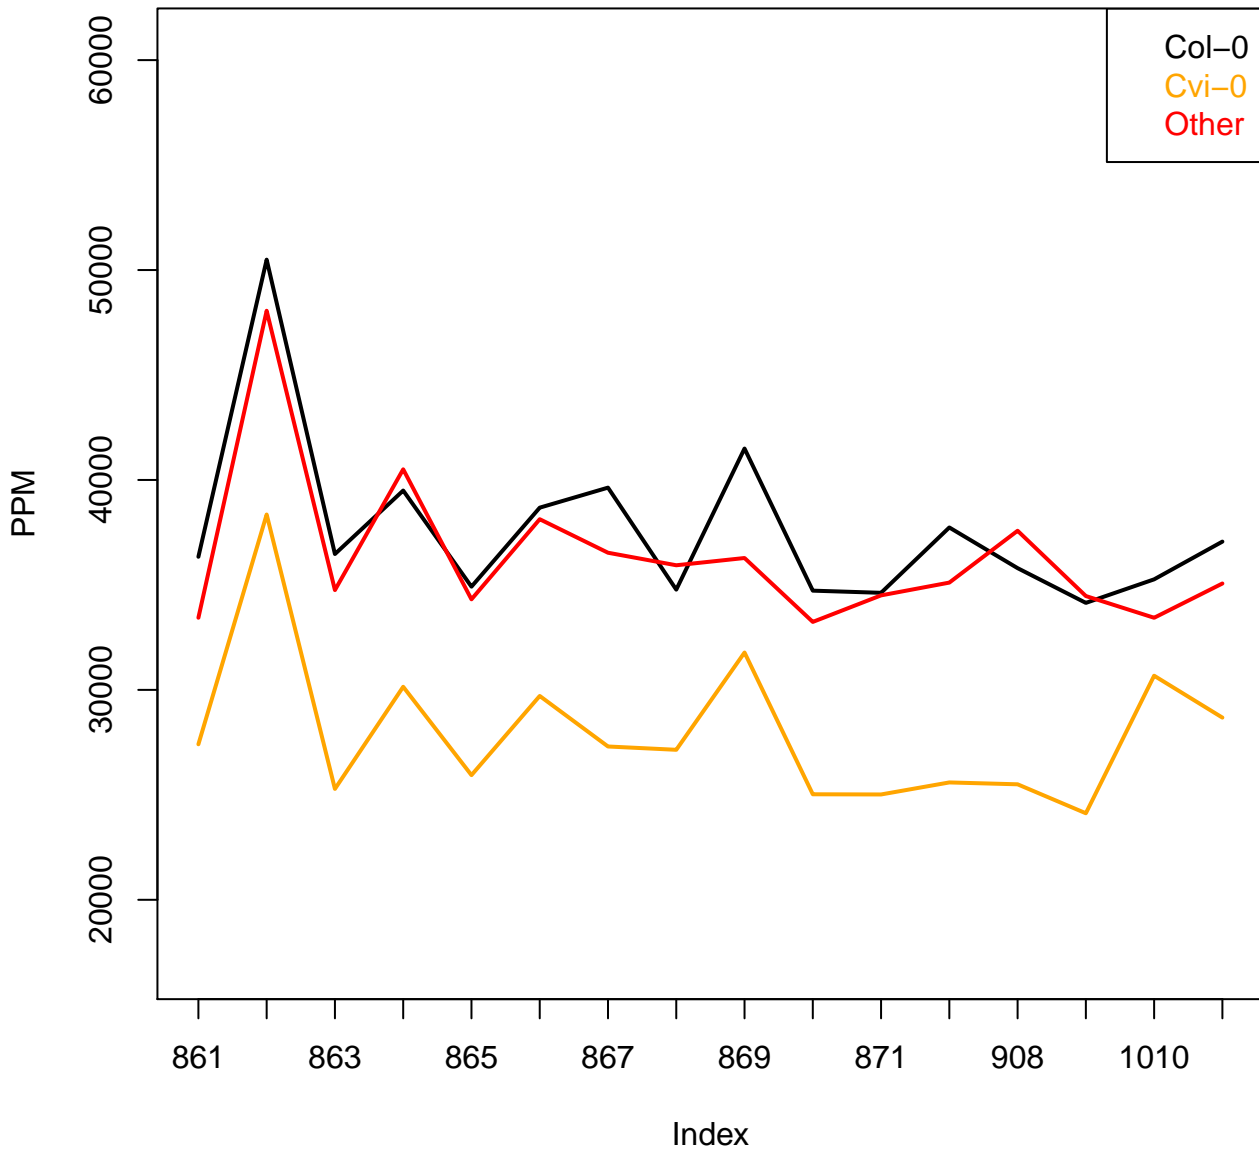

# Mn55

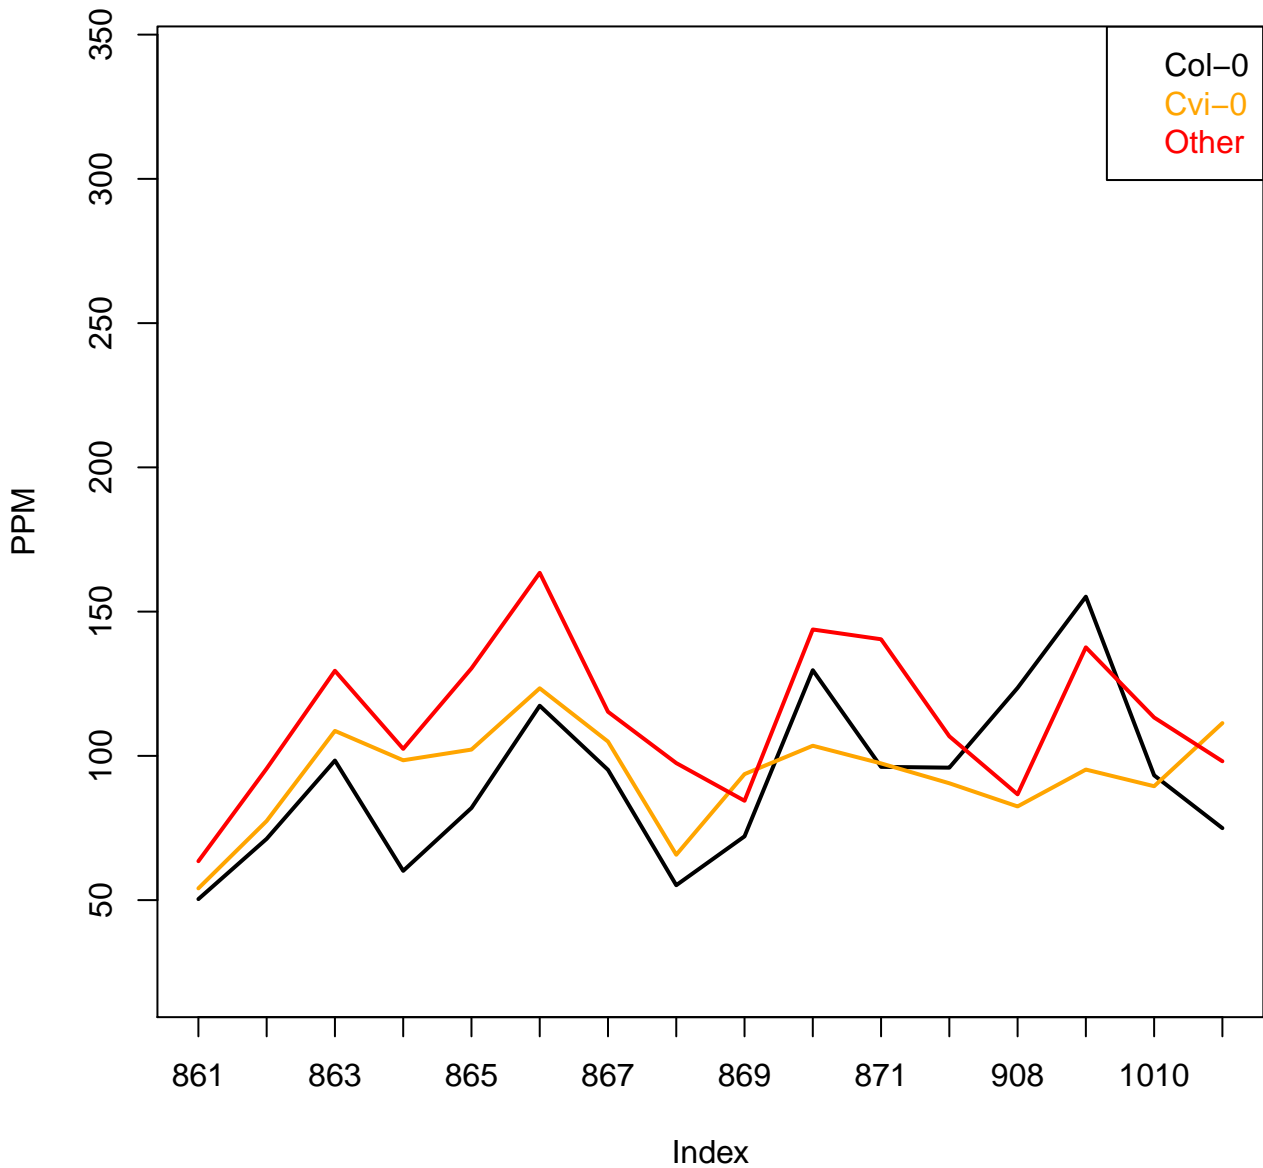



# Fe56

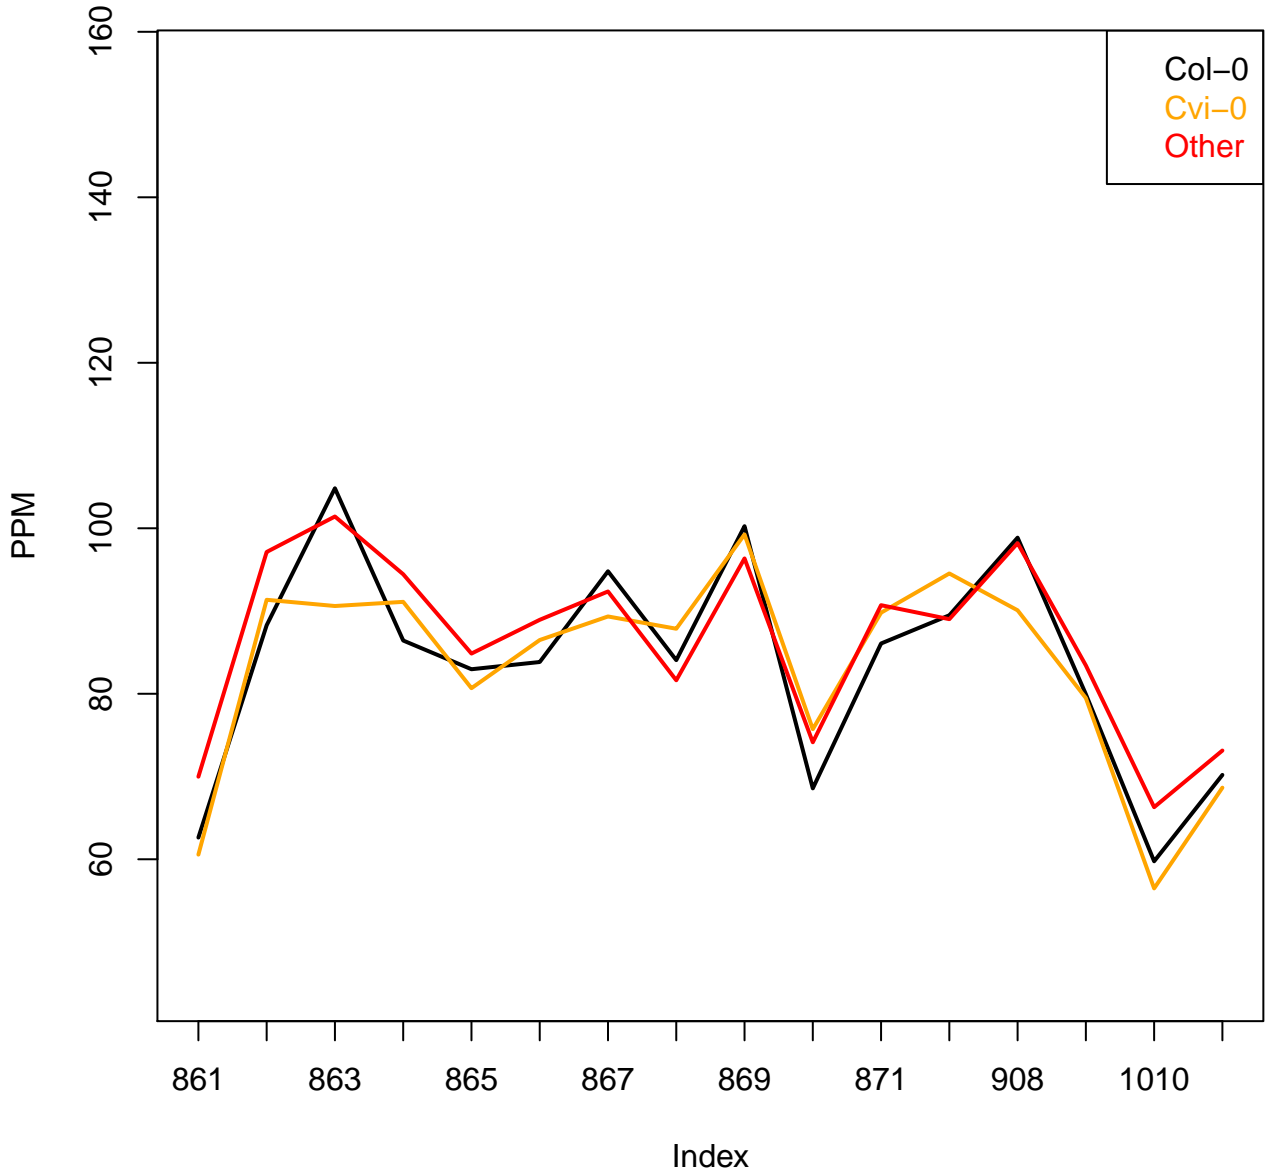

# Co59

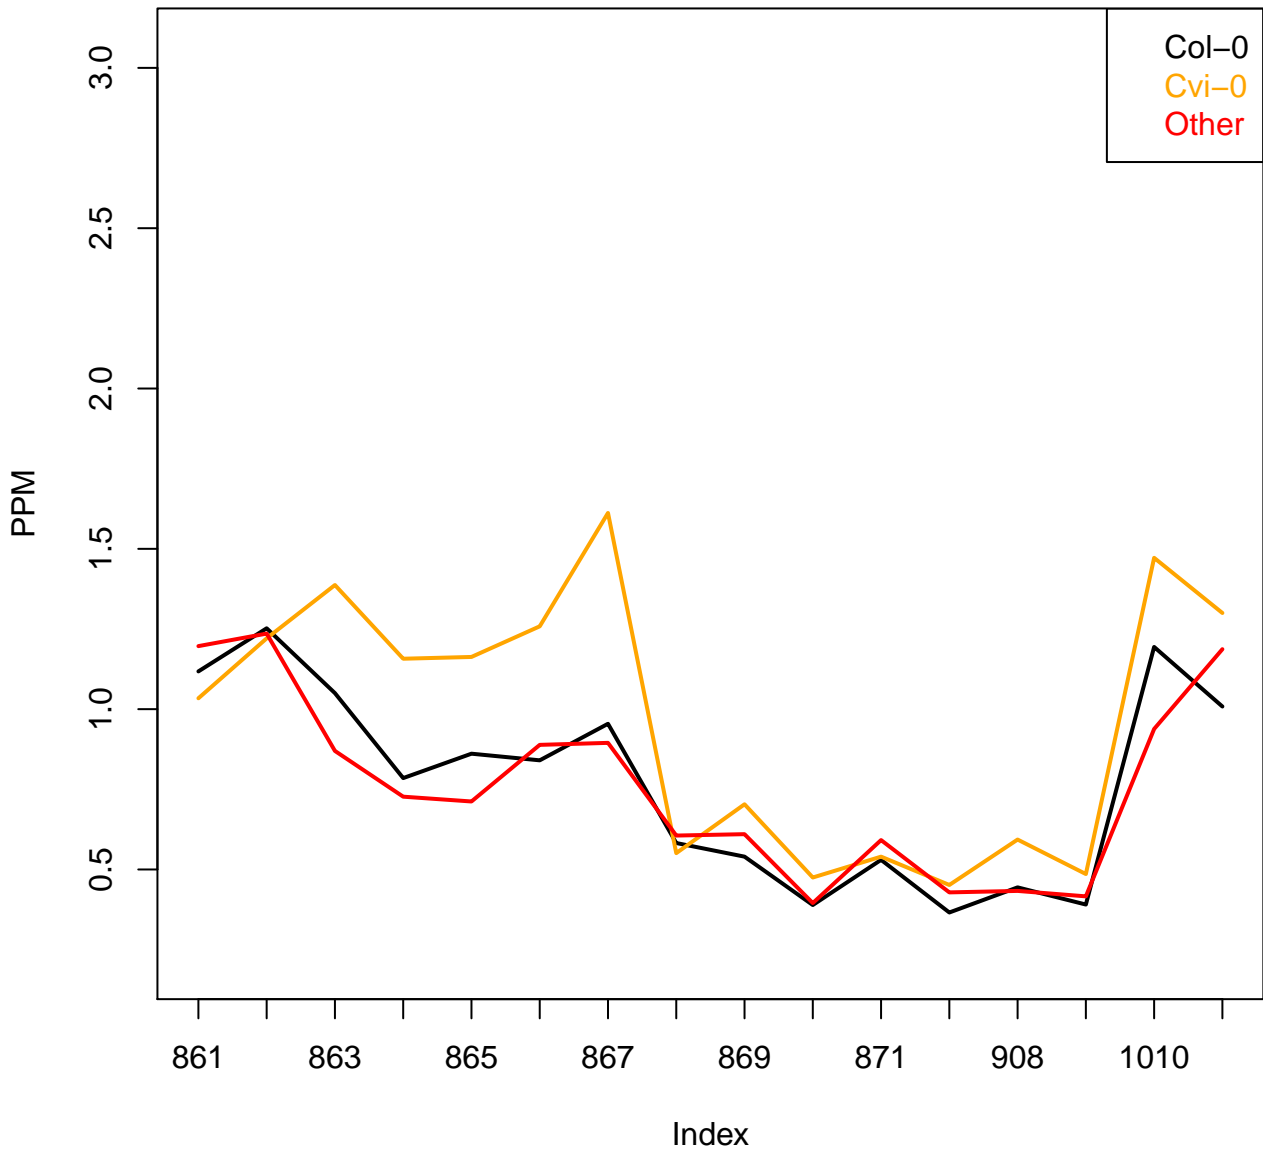

# Ni60

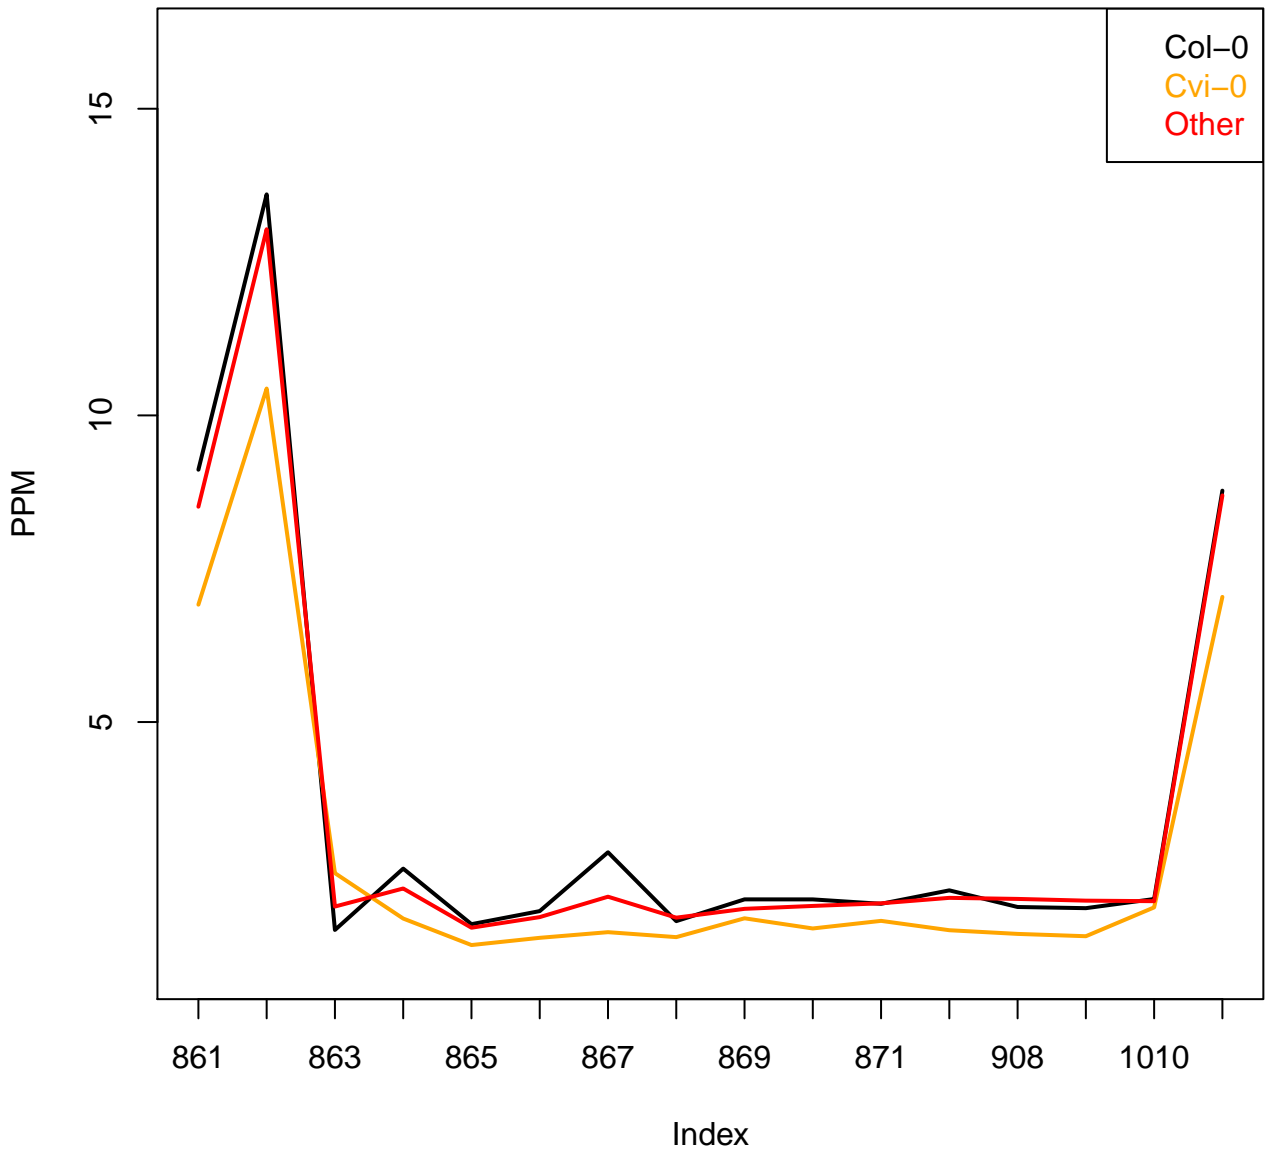

# Cu65

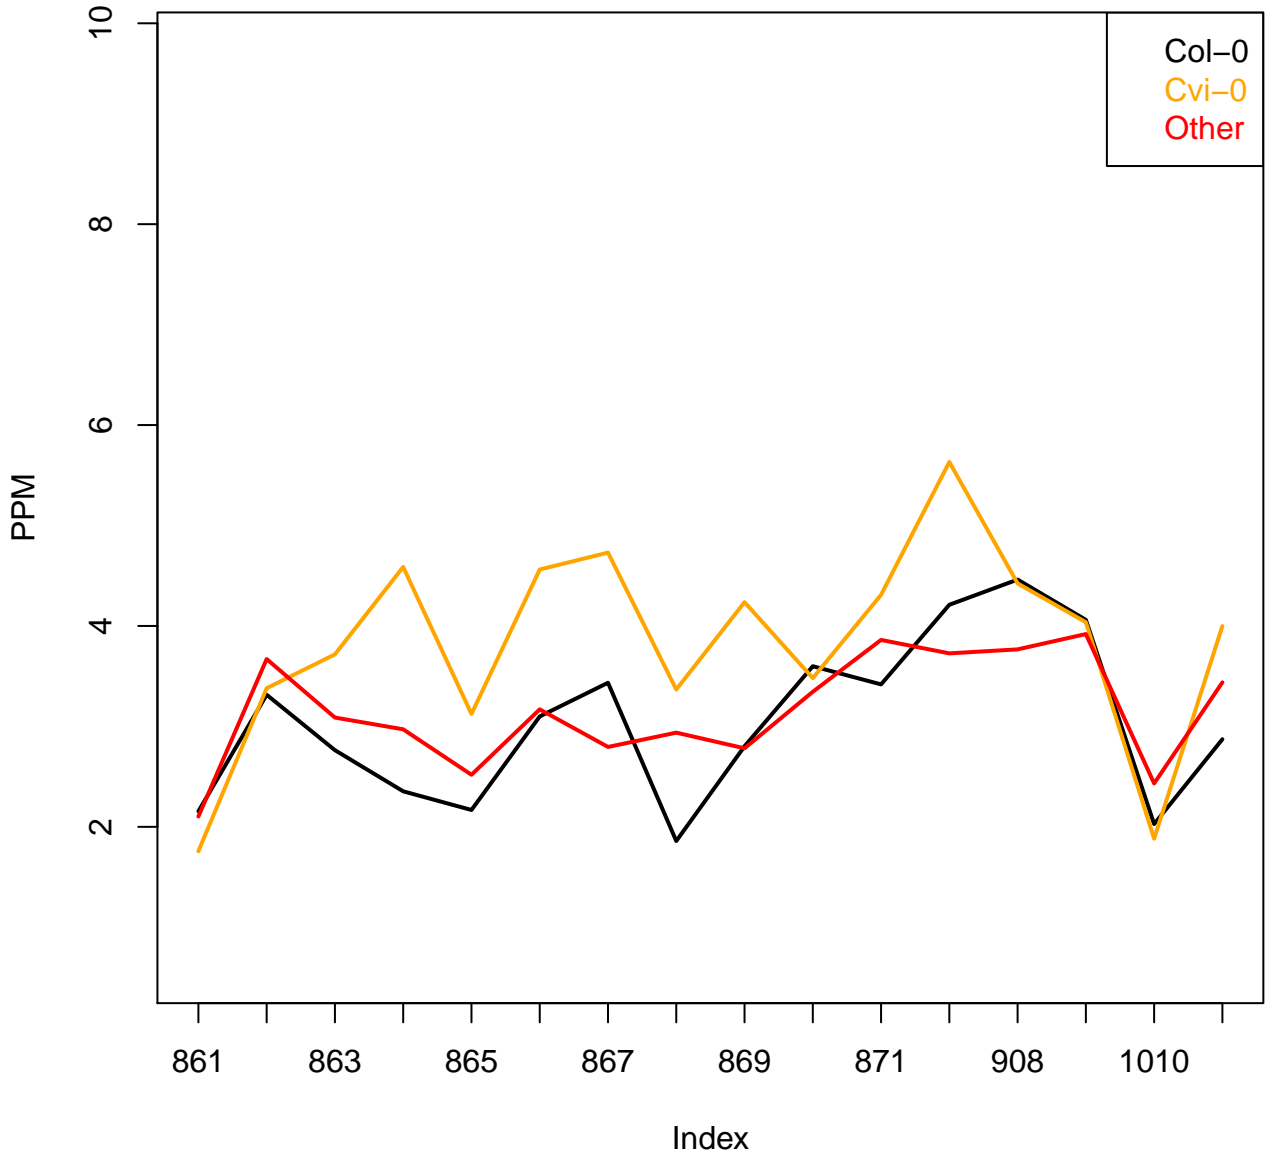

# Zn66

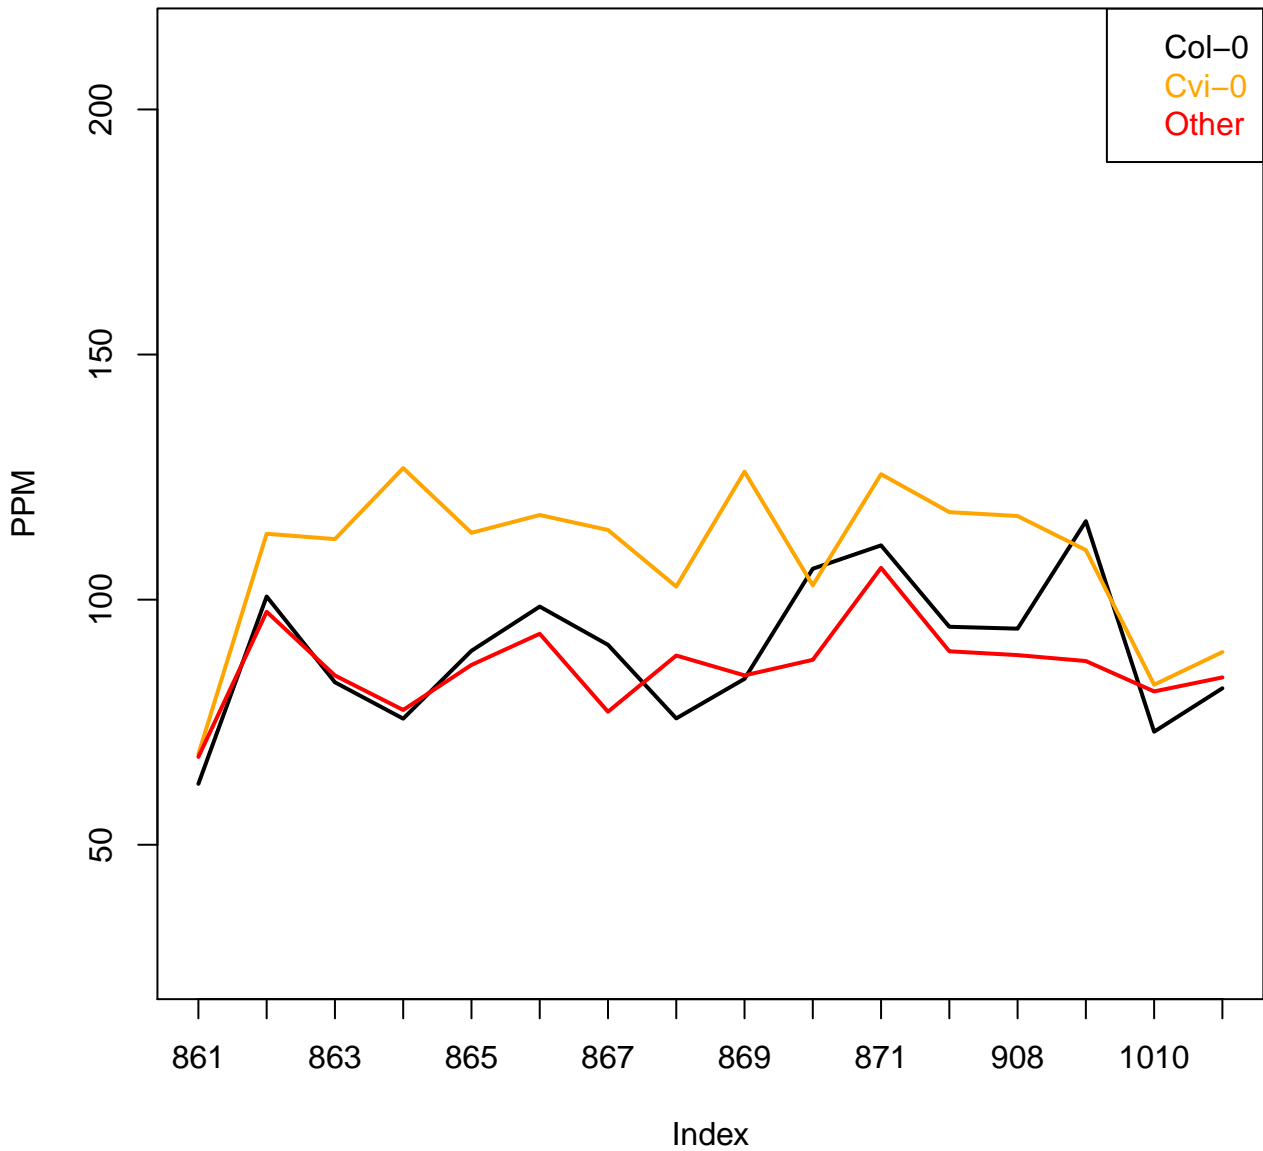

# As75

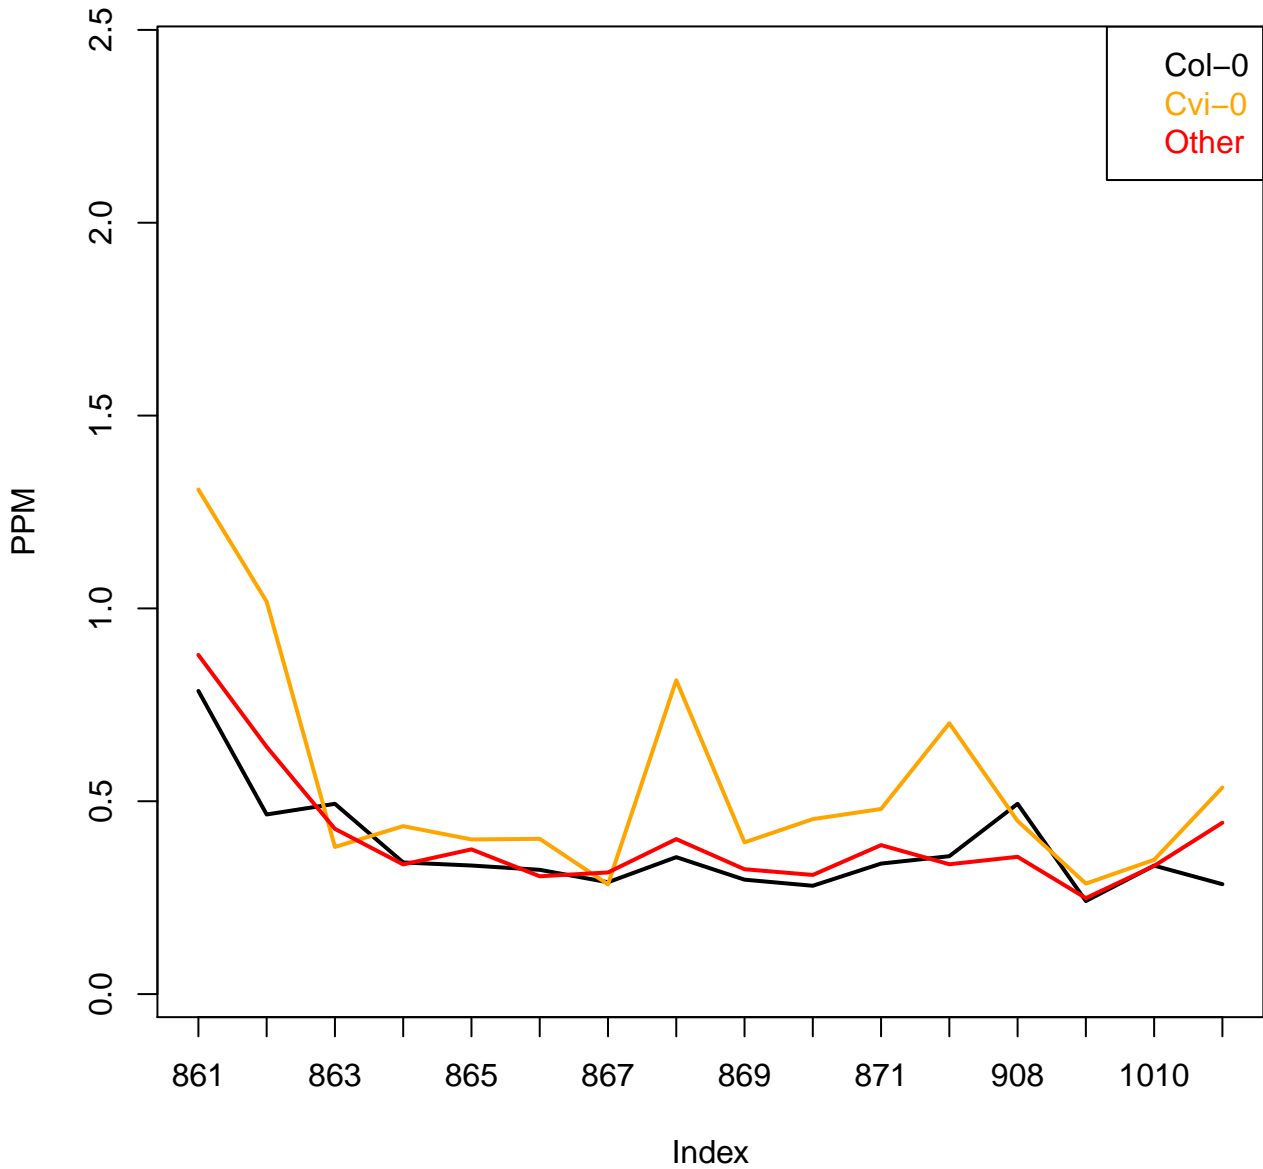

# Se77

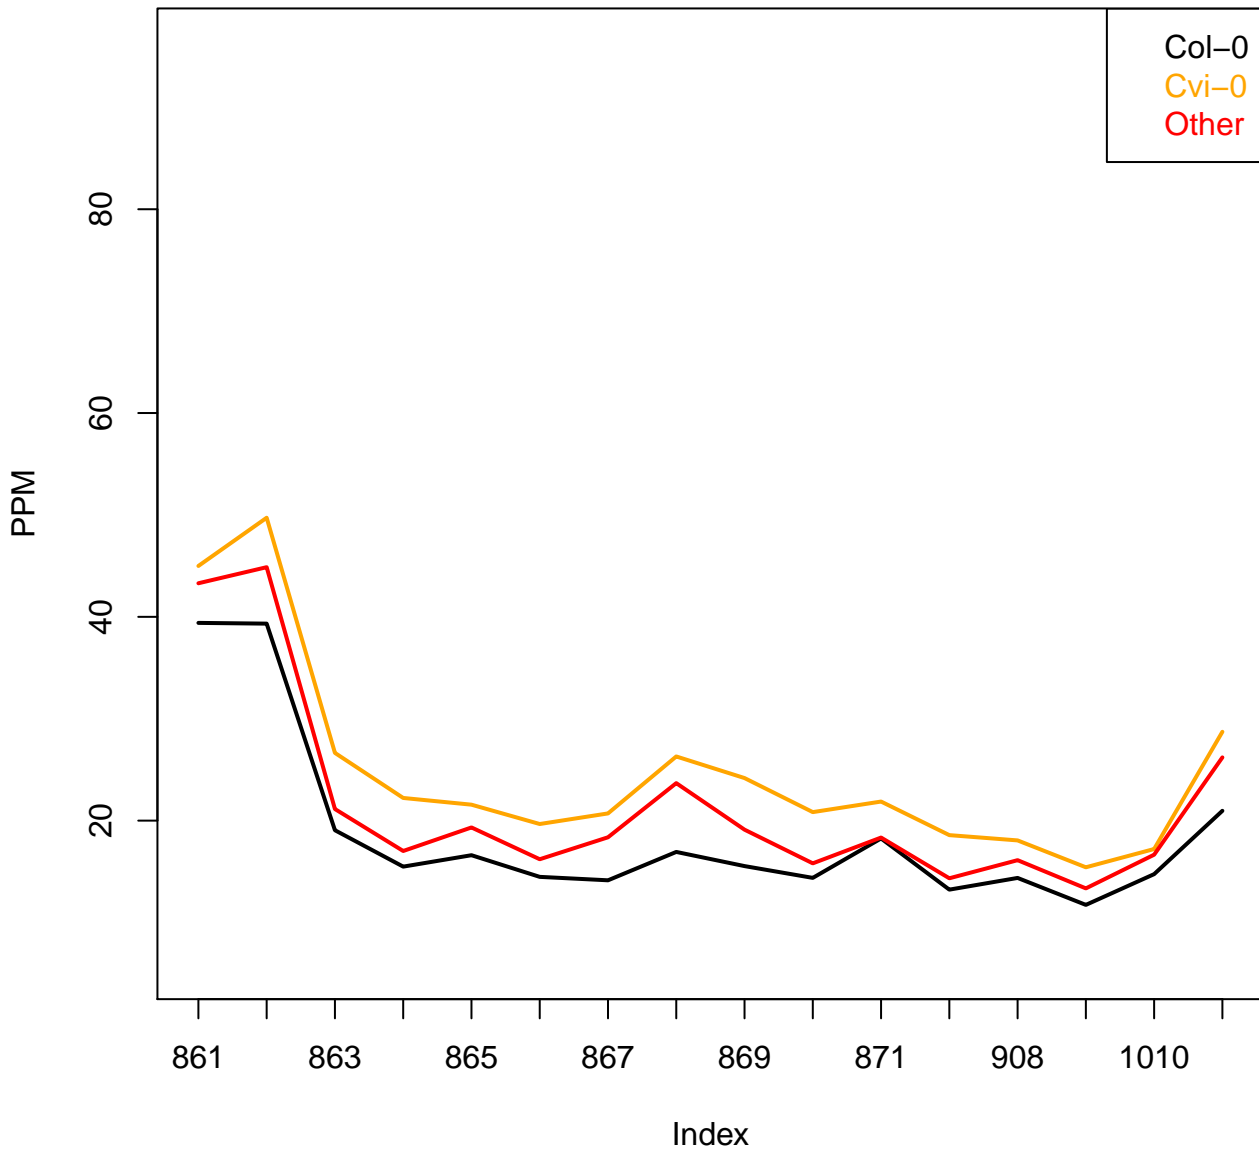

# Mo95

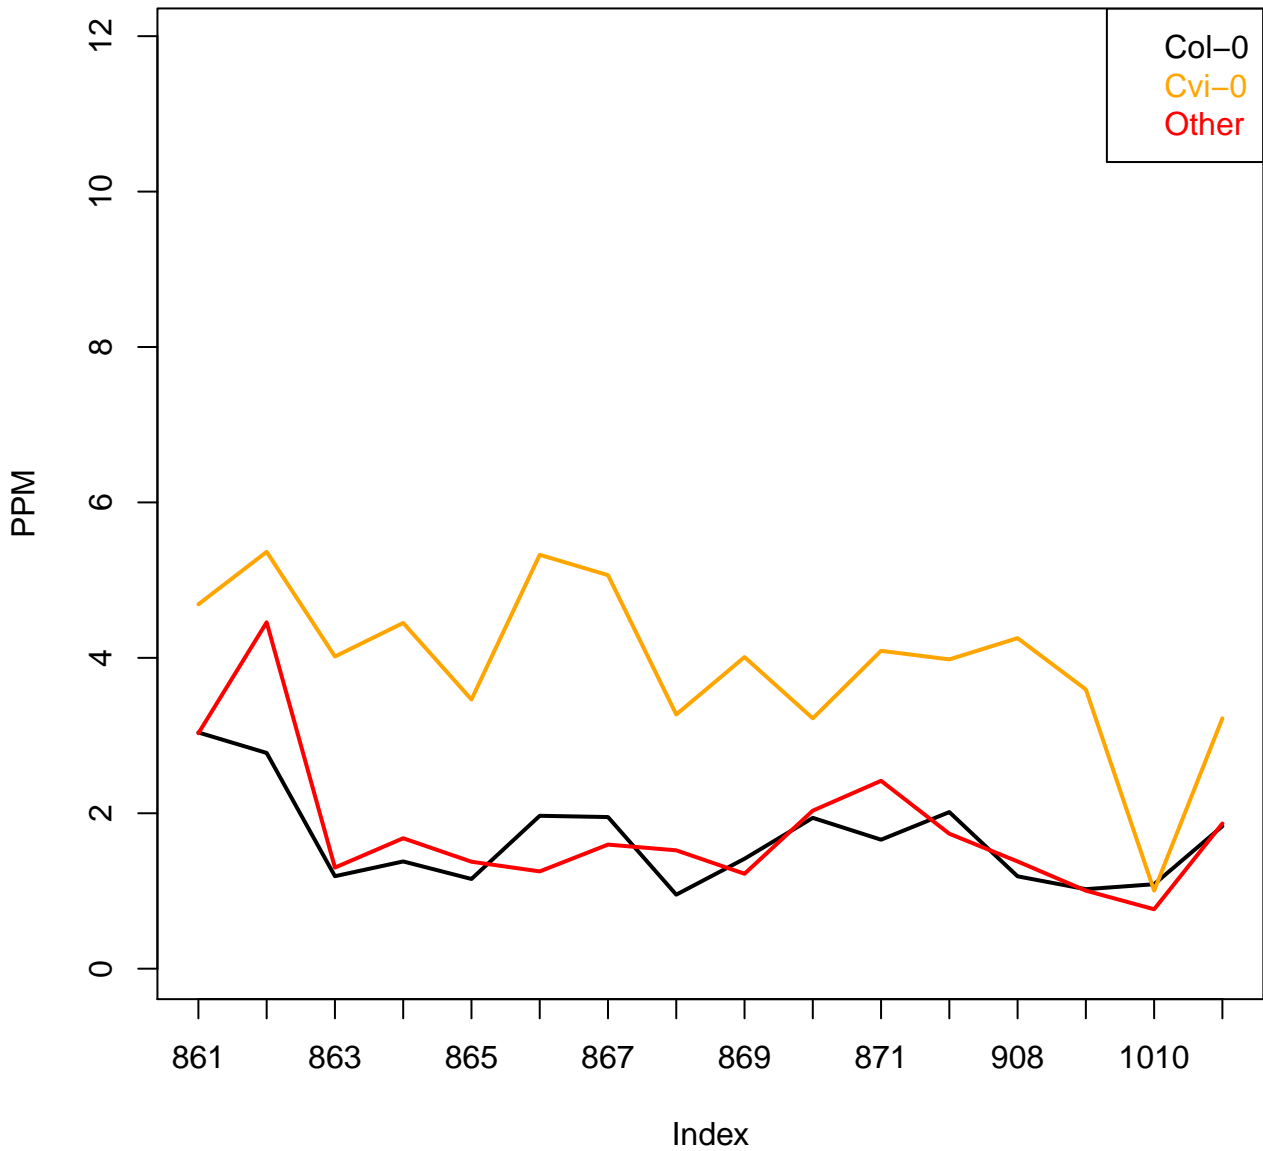



# Cd111

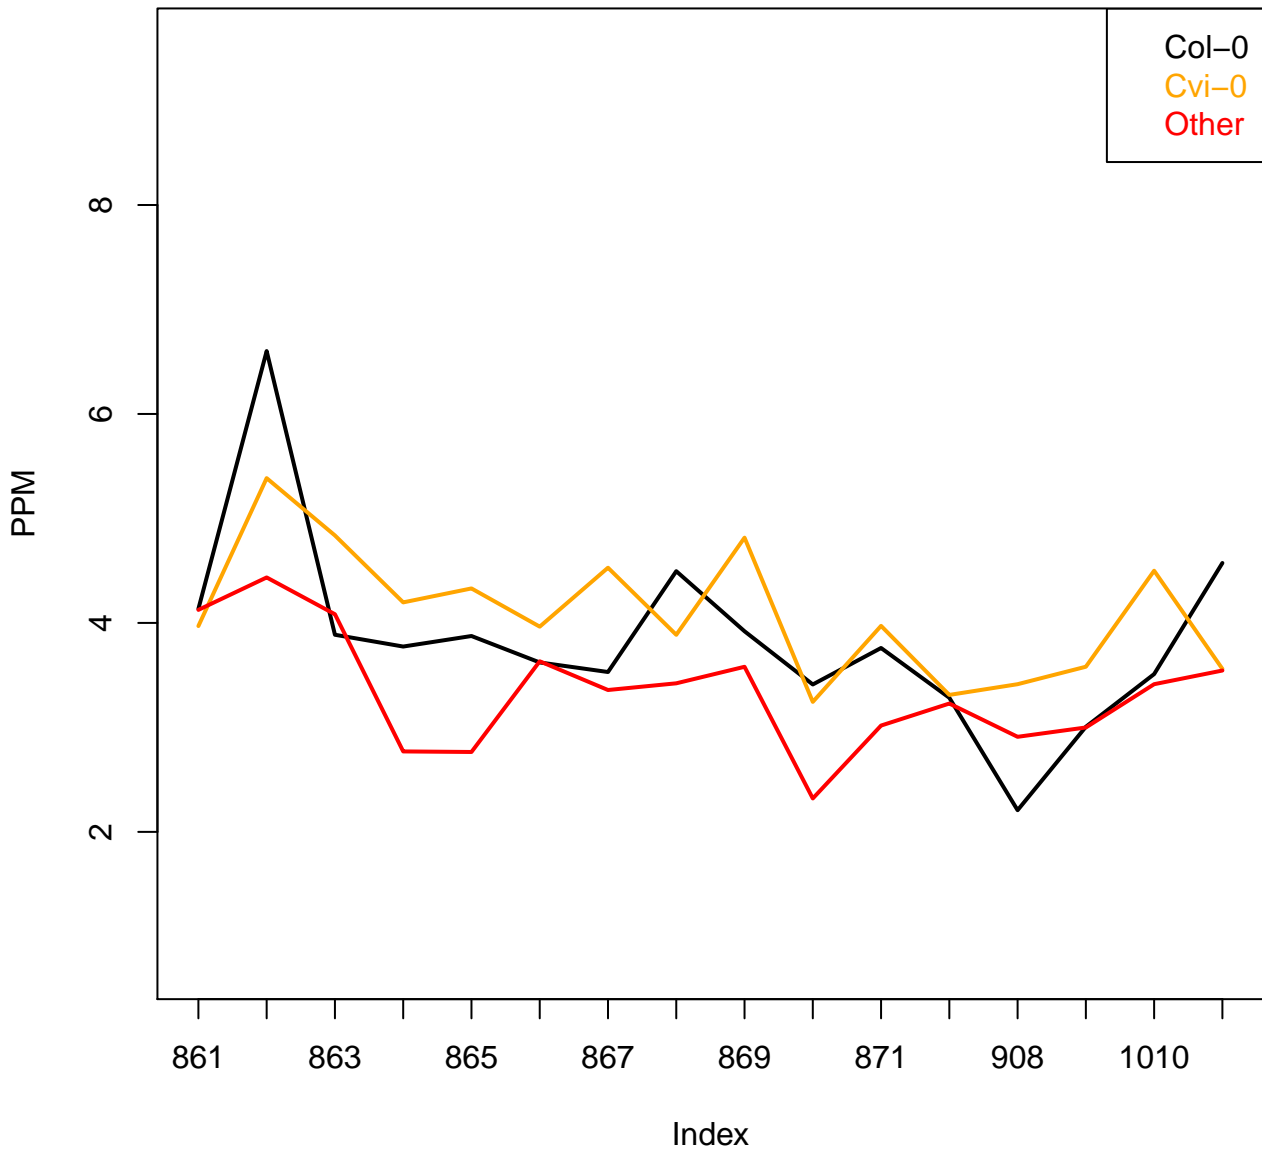

Supplement: pone.0035121.s004.pdf [file pone.0035121.s004.pdf]
