# Supplementary material for: Biodiversity of Mineral Nutrient and Trace Element Accumulation in Arabidopsis thaliana
Source: PubMed Central journal article supplement (PMC3338729; doi:10.1371/journal.pone.0035121), 2012-04-27

# Li7

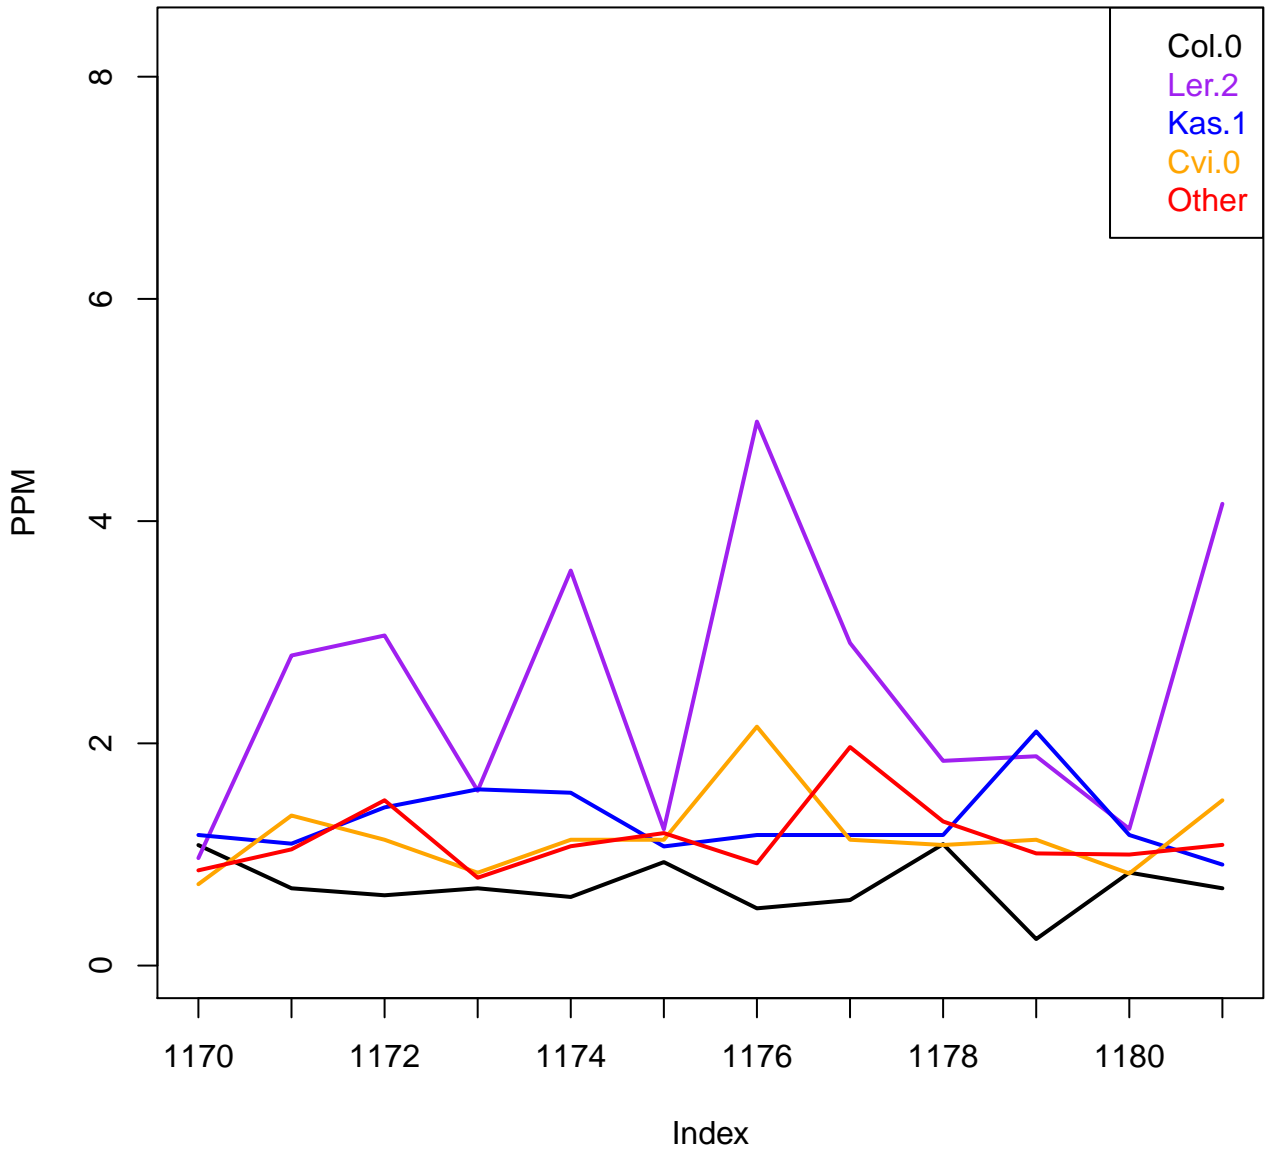

# B11

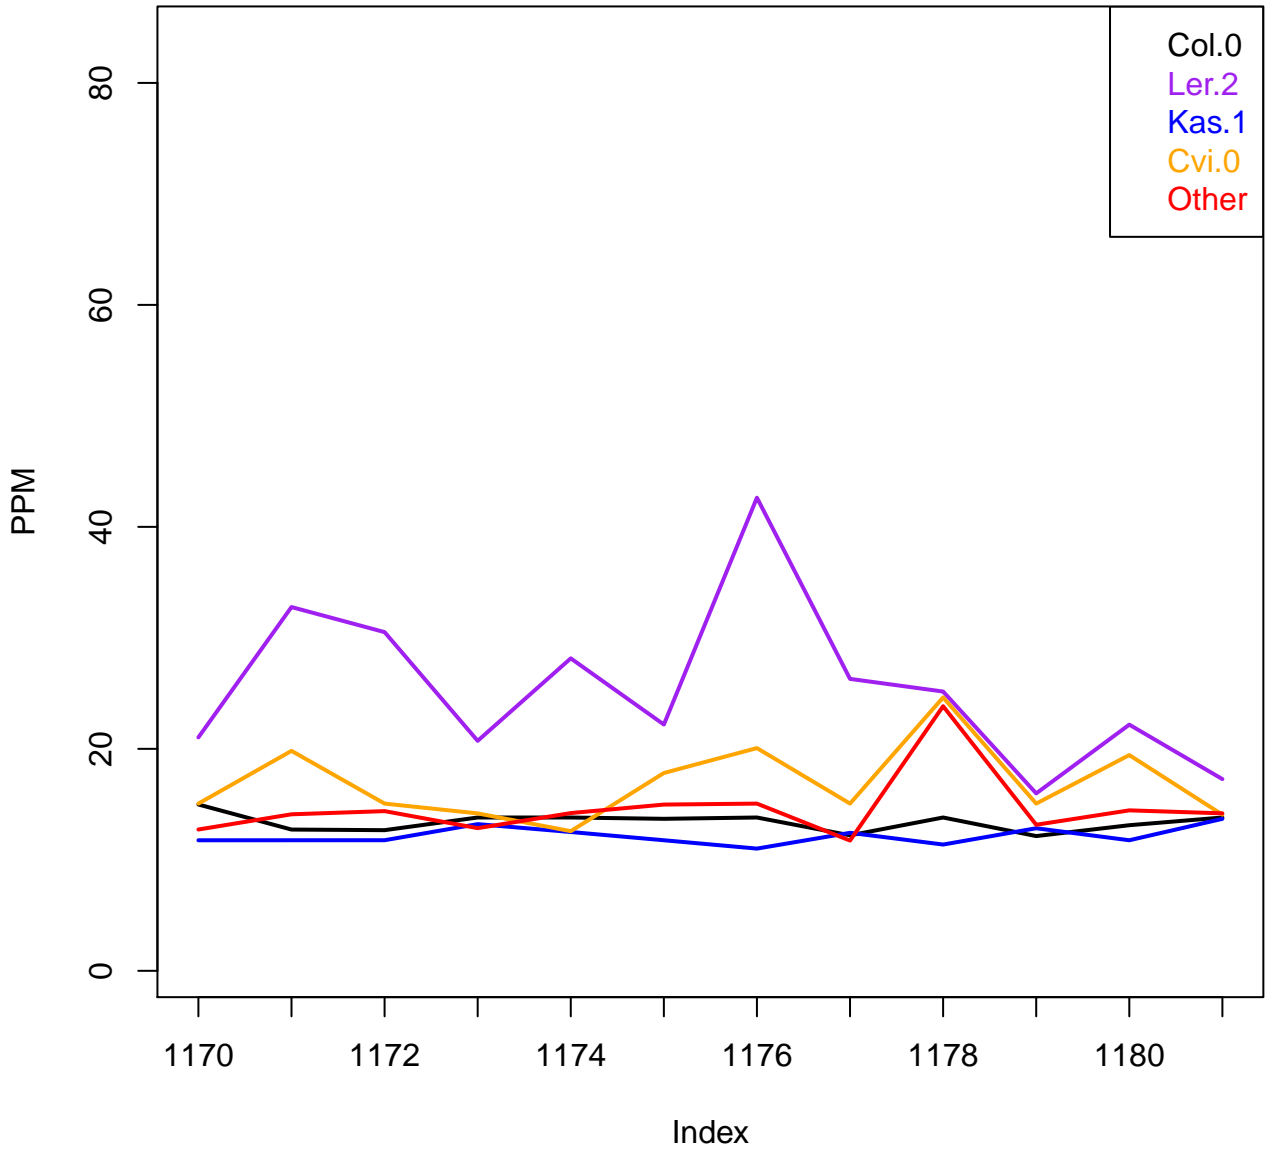

# Na23

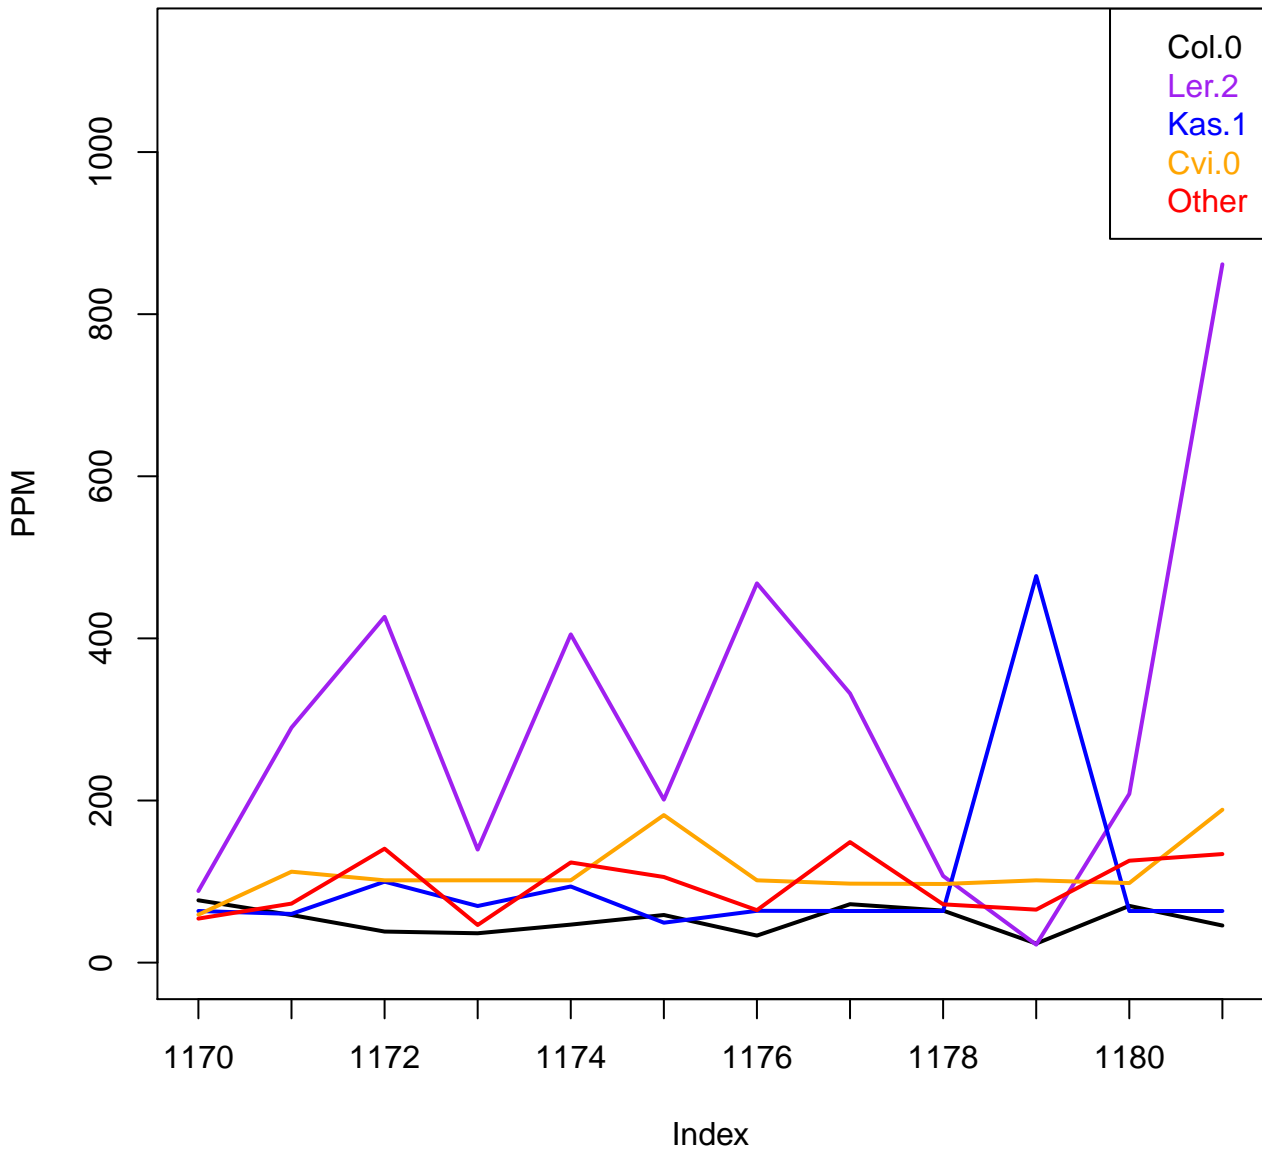

# Mg25

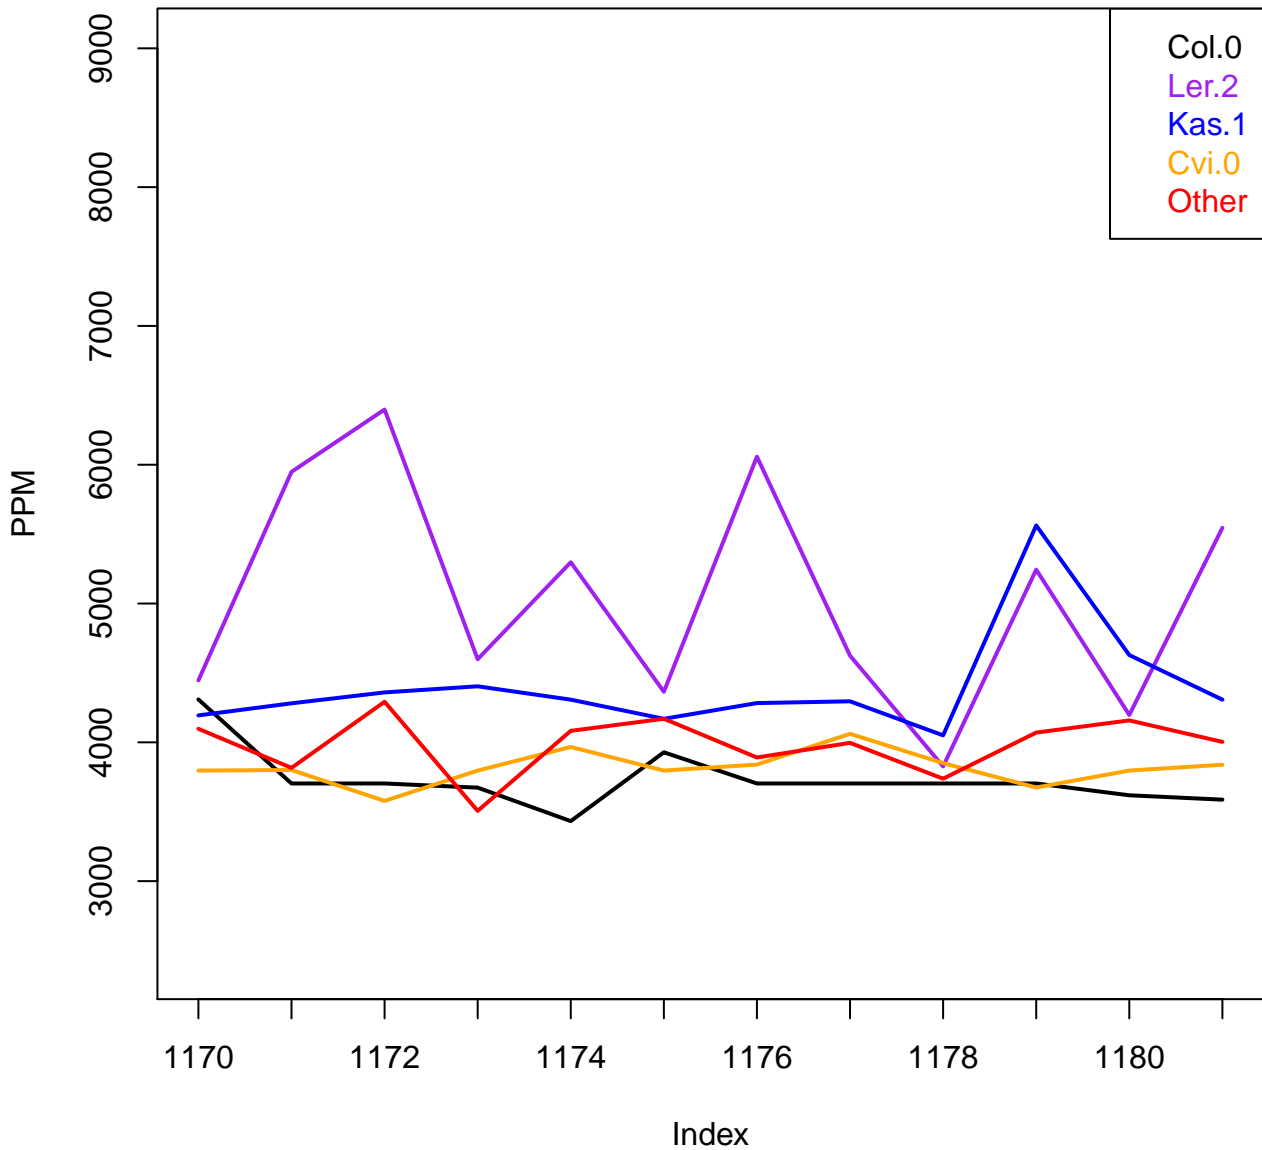

# P31

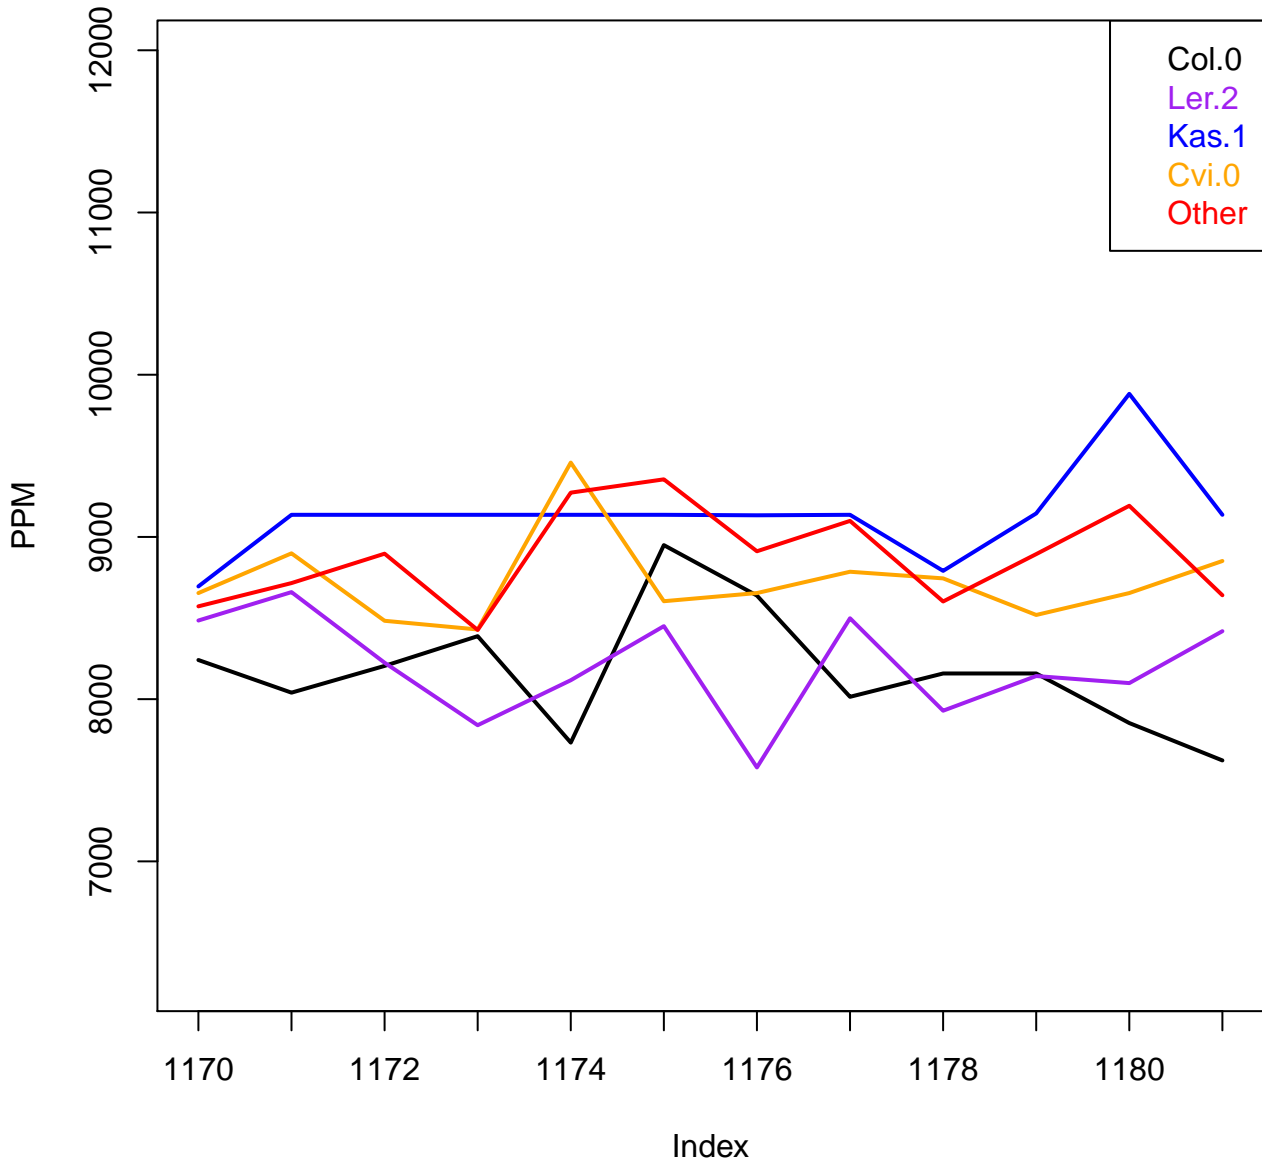

# S34

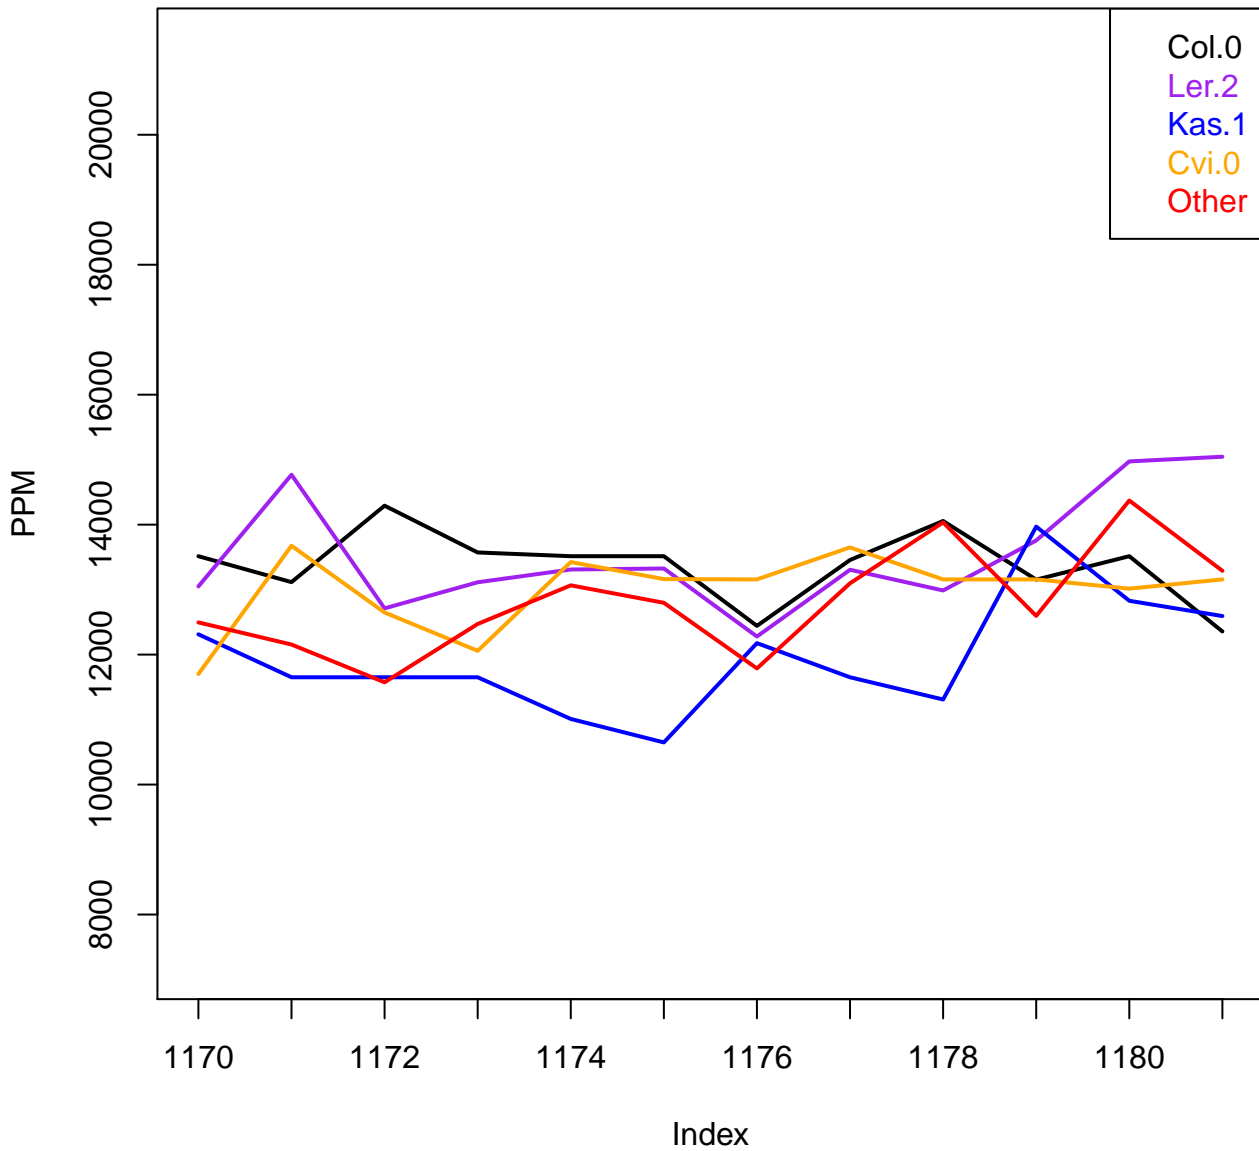

# K39

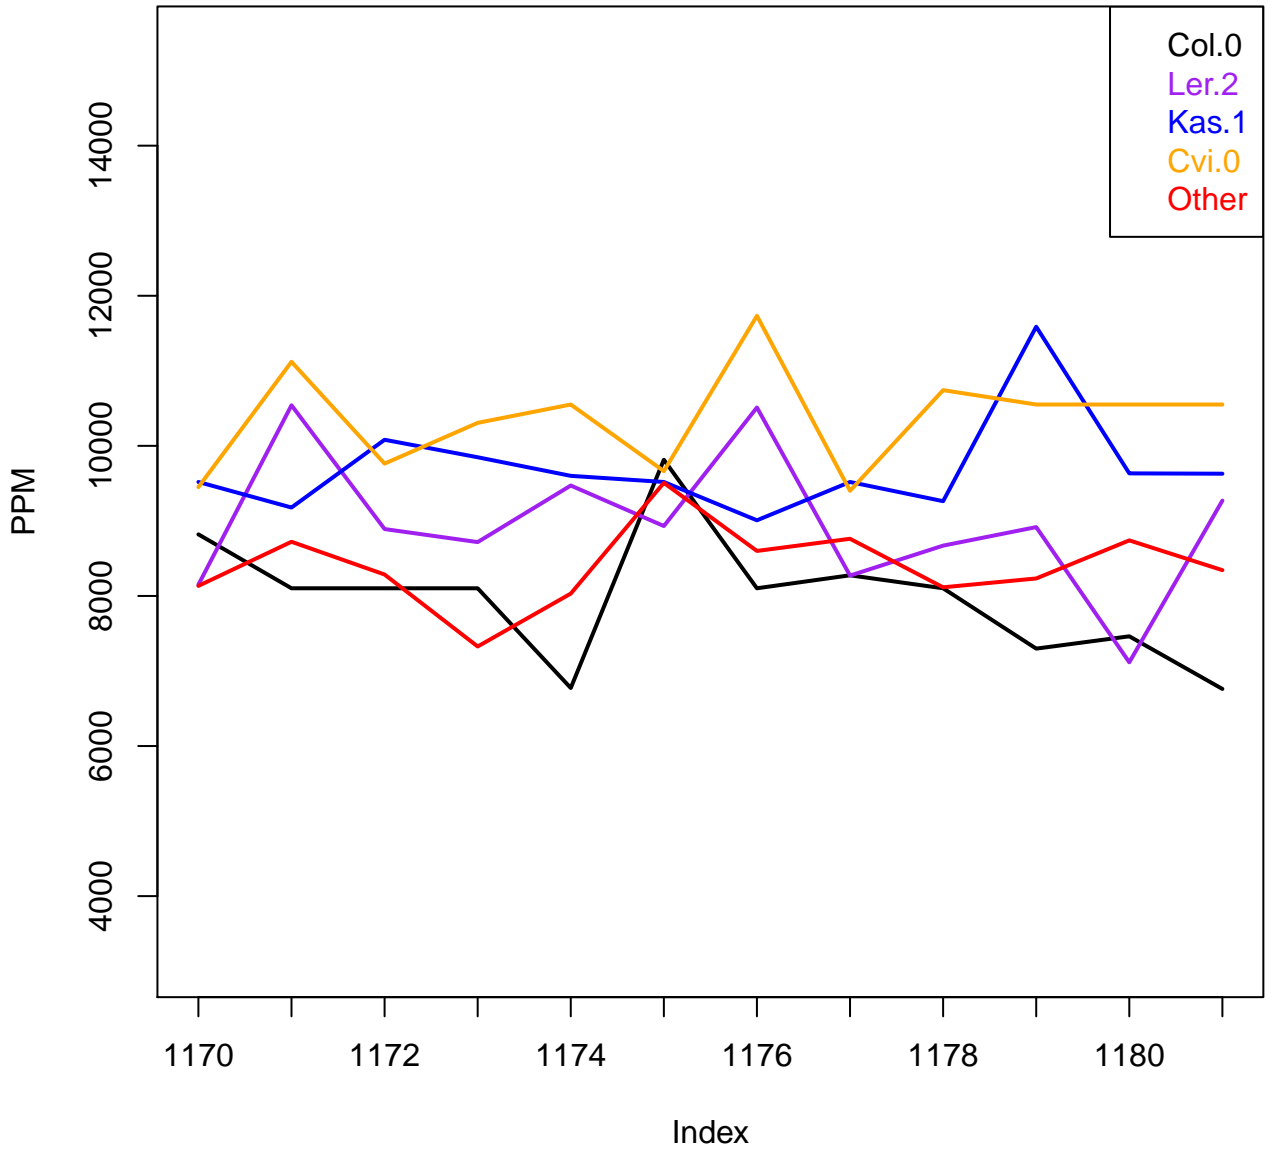

# Ca43

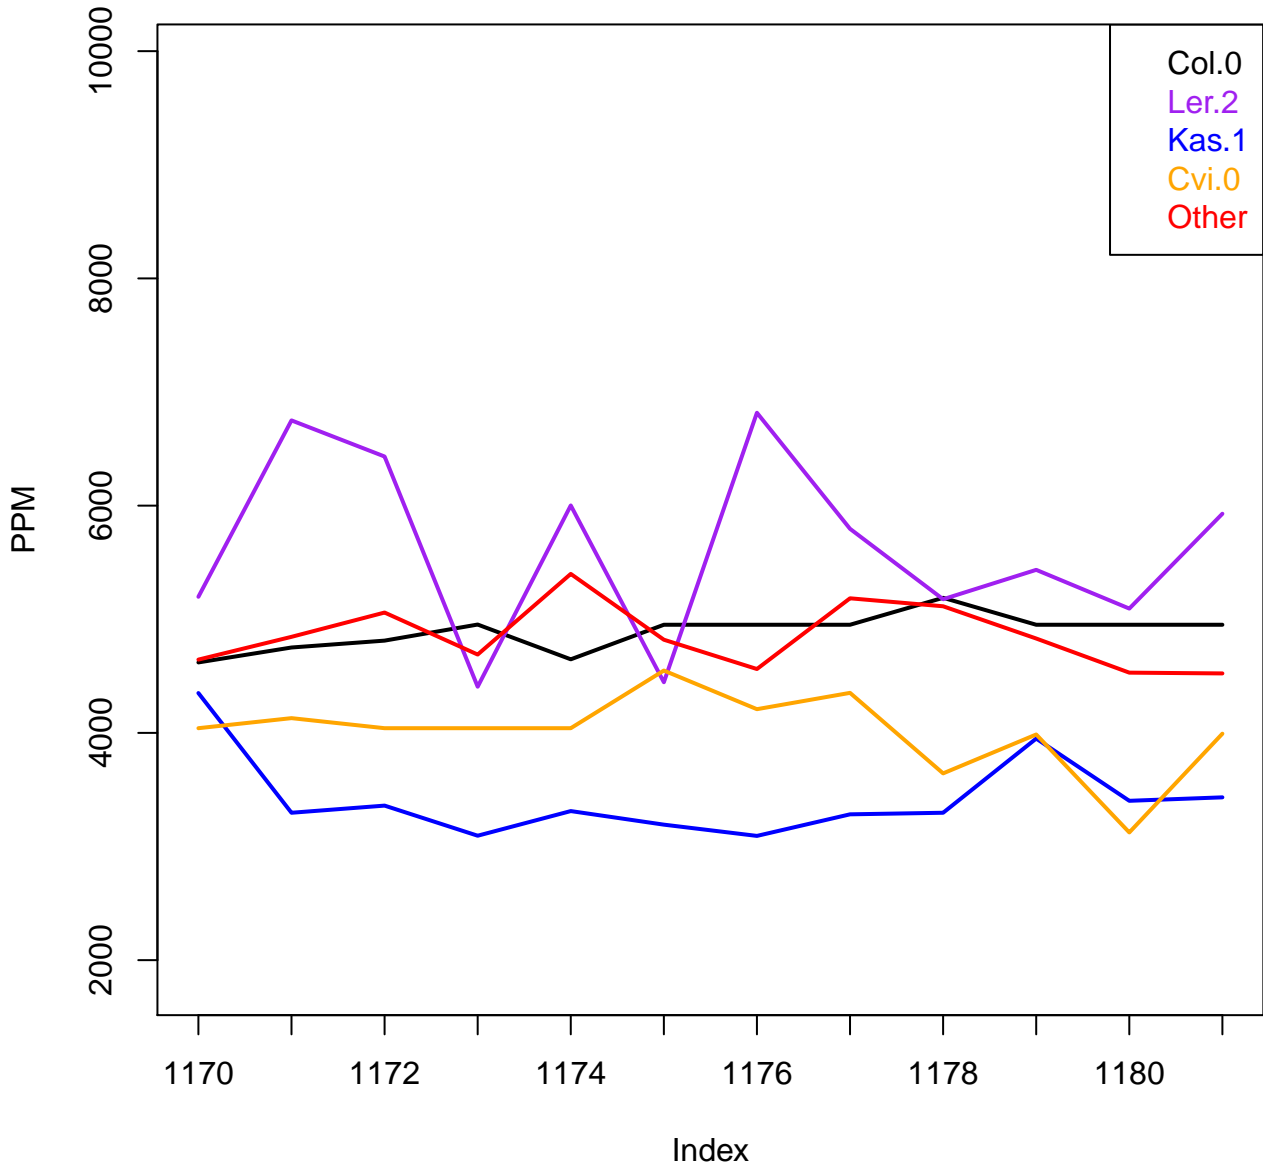



# Mn55

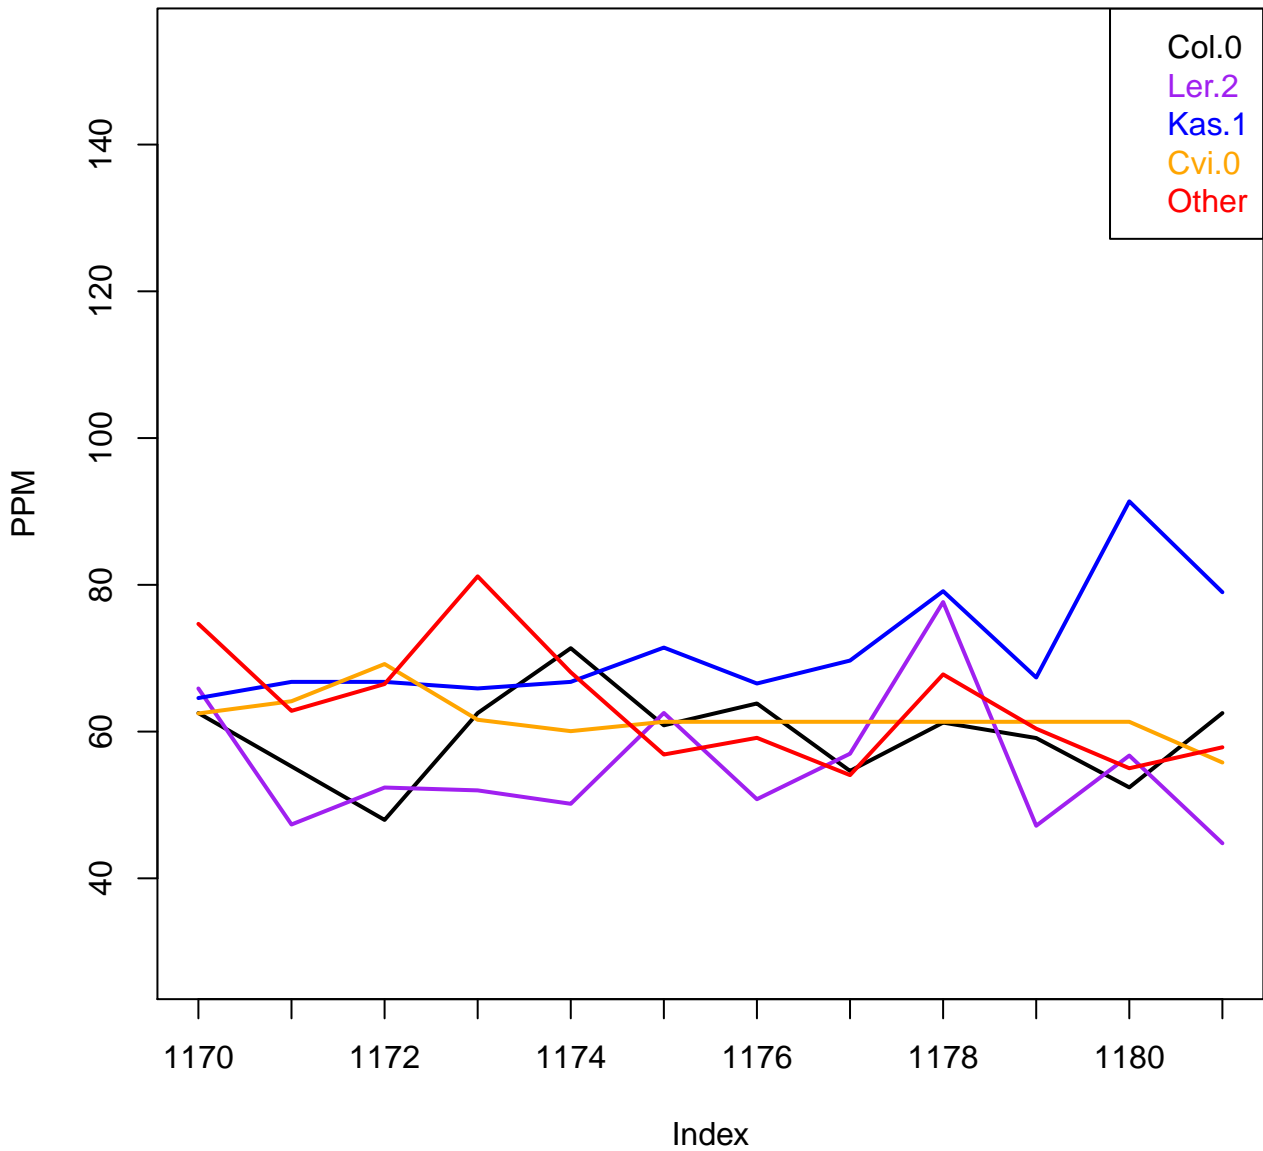

# Fe57

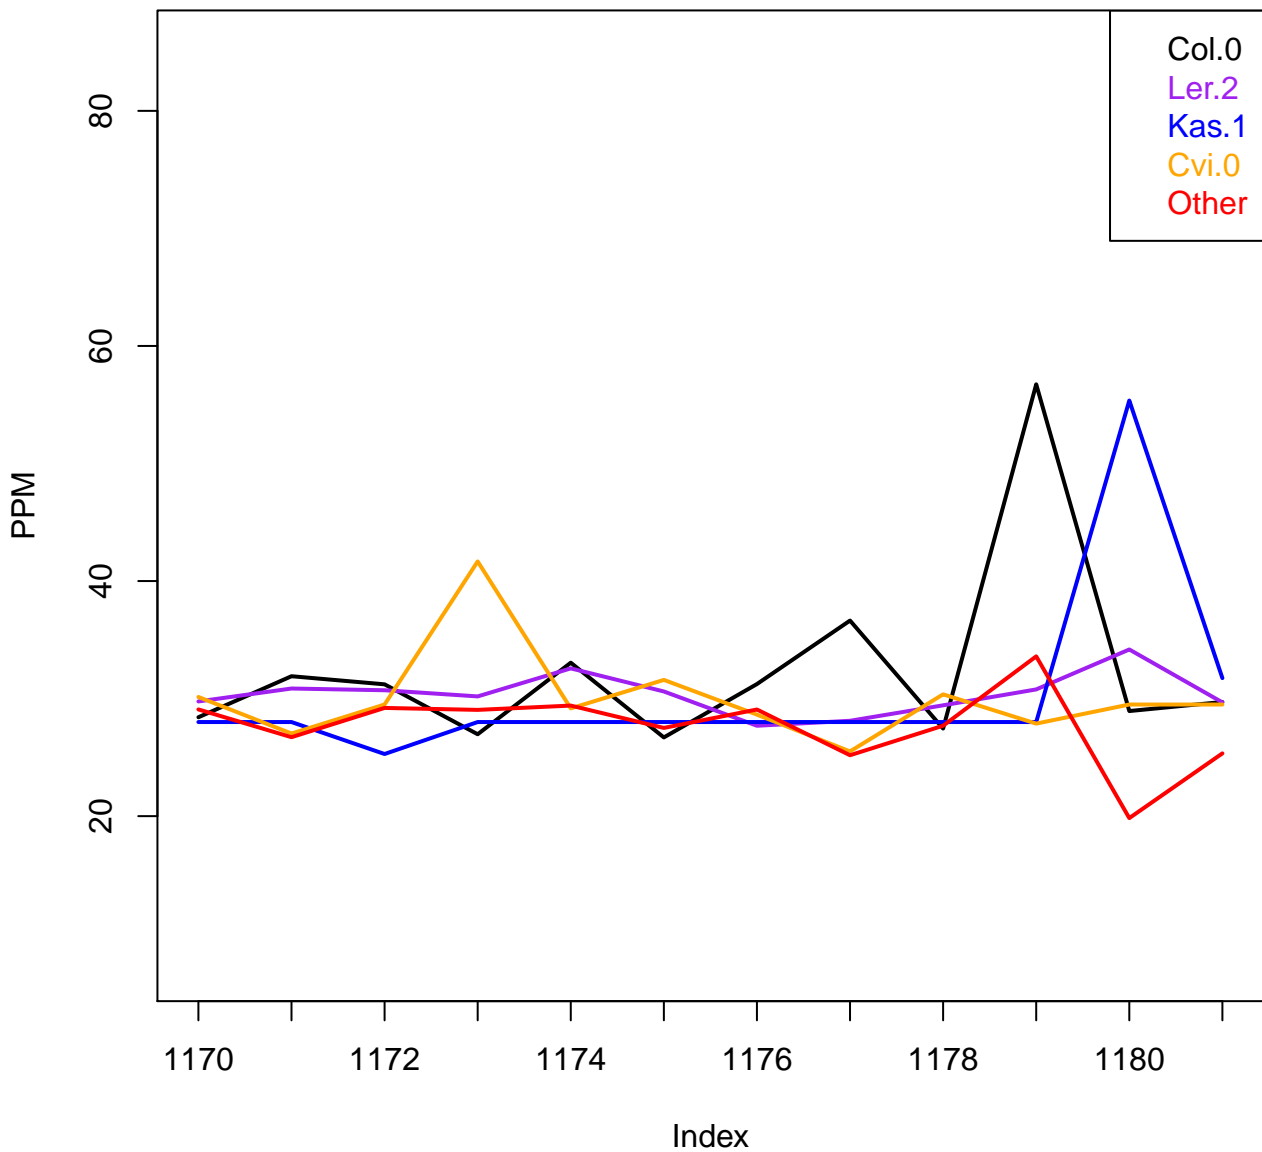

# Co59

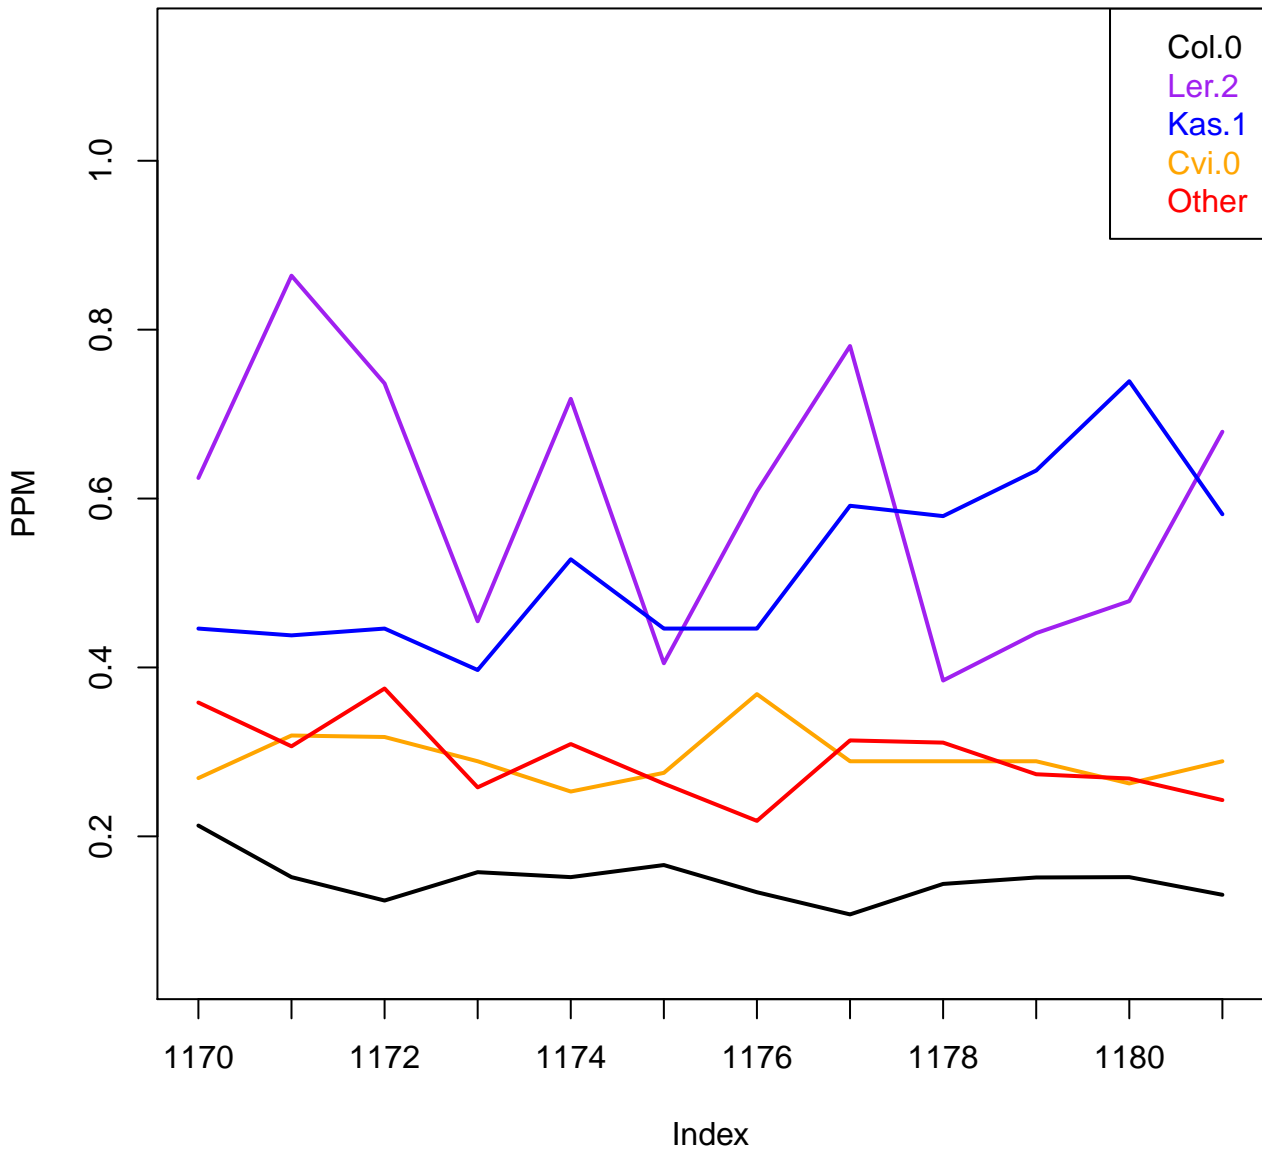

# Ni60

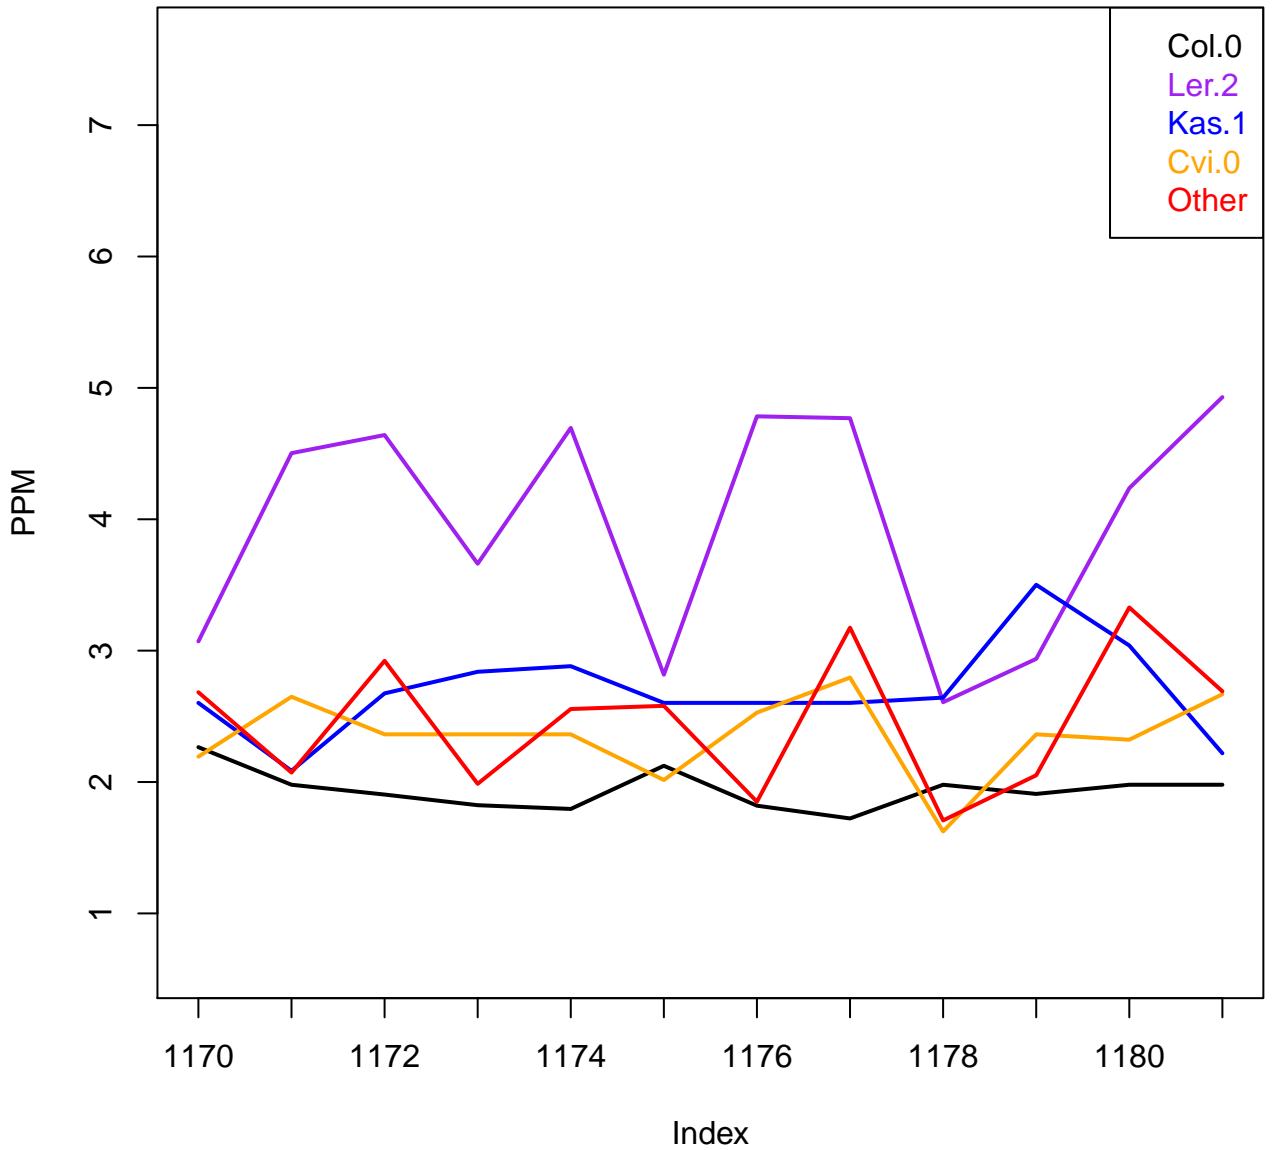

# Cu65

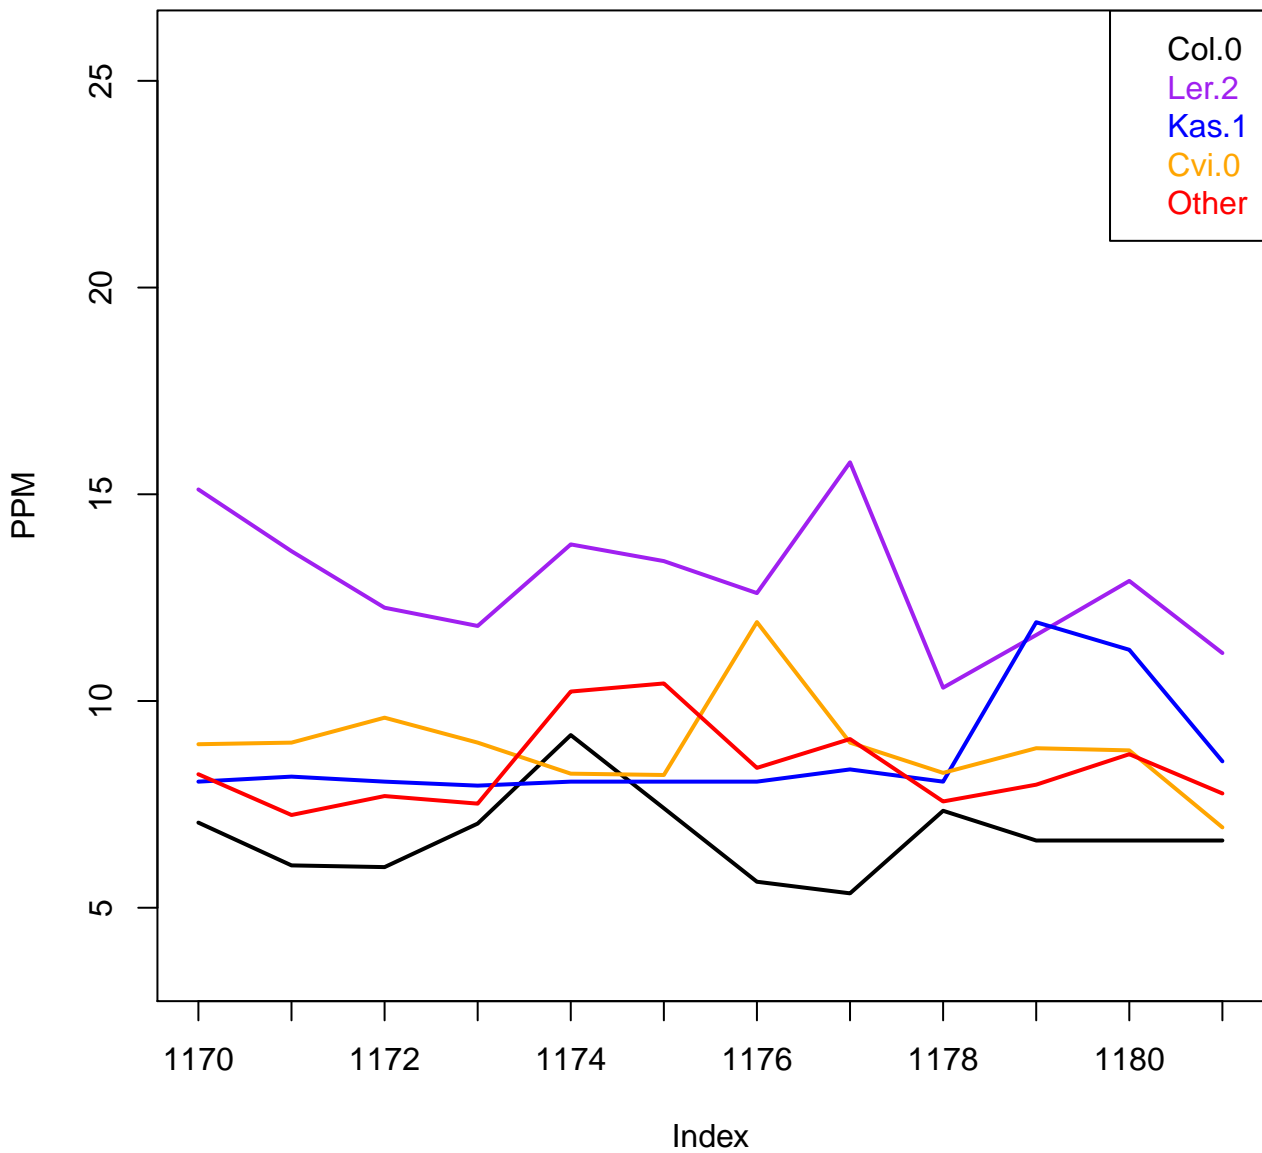

# Zn66

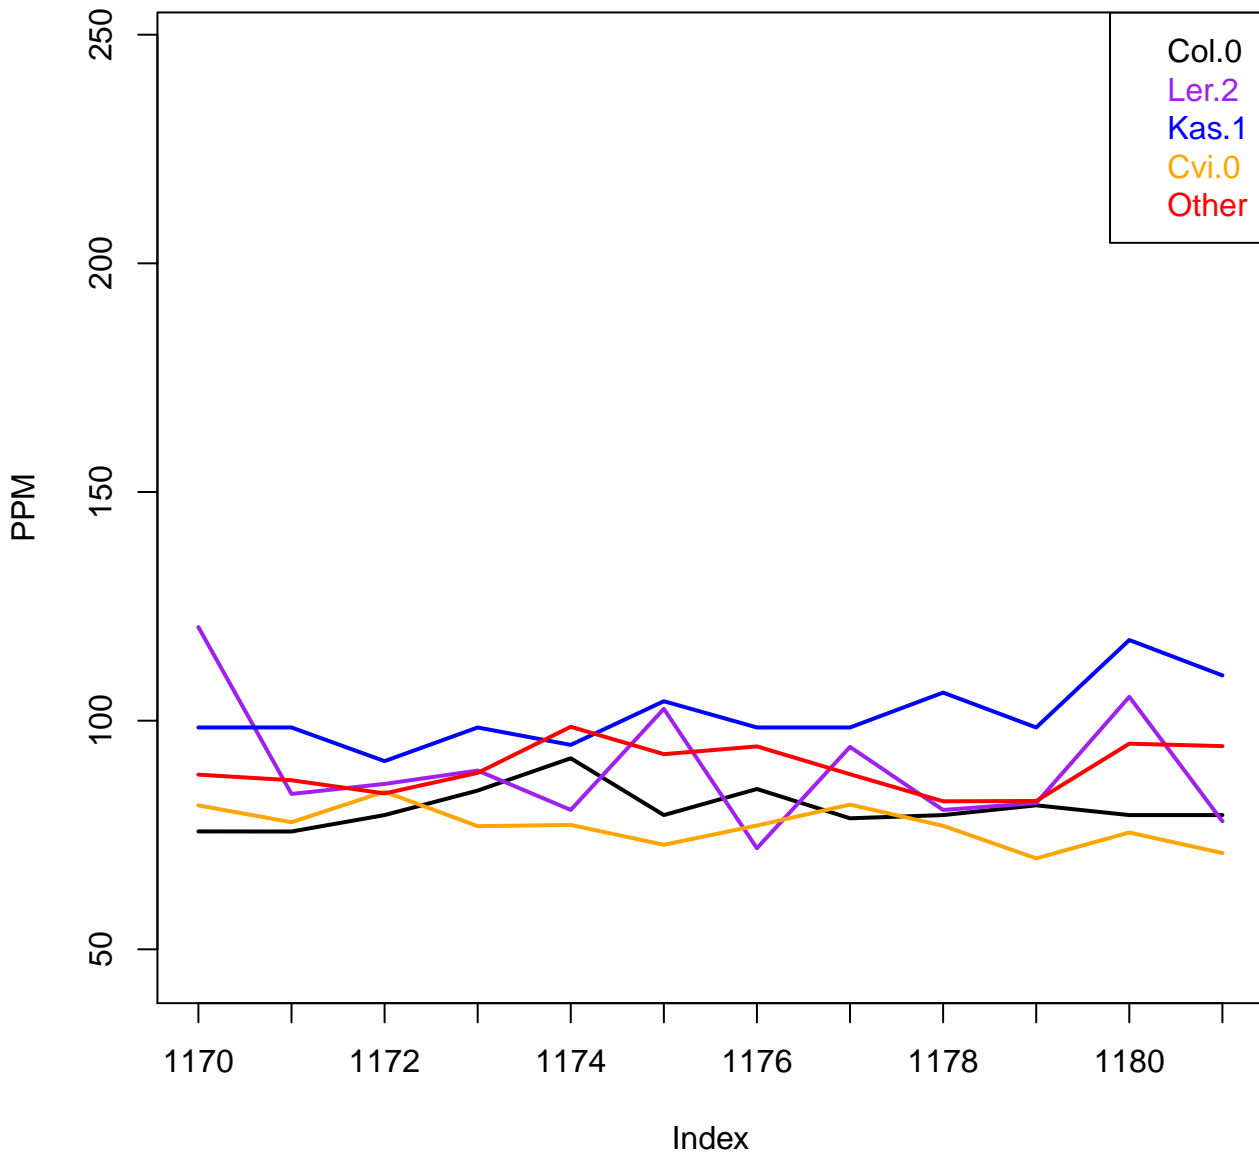

# As75

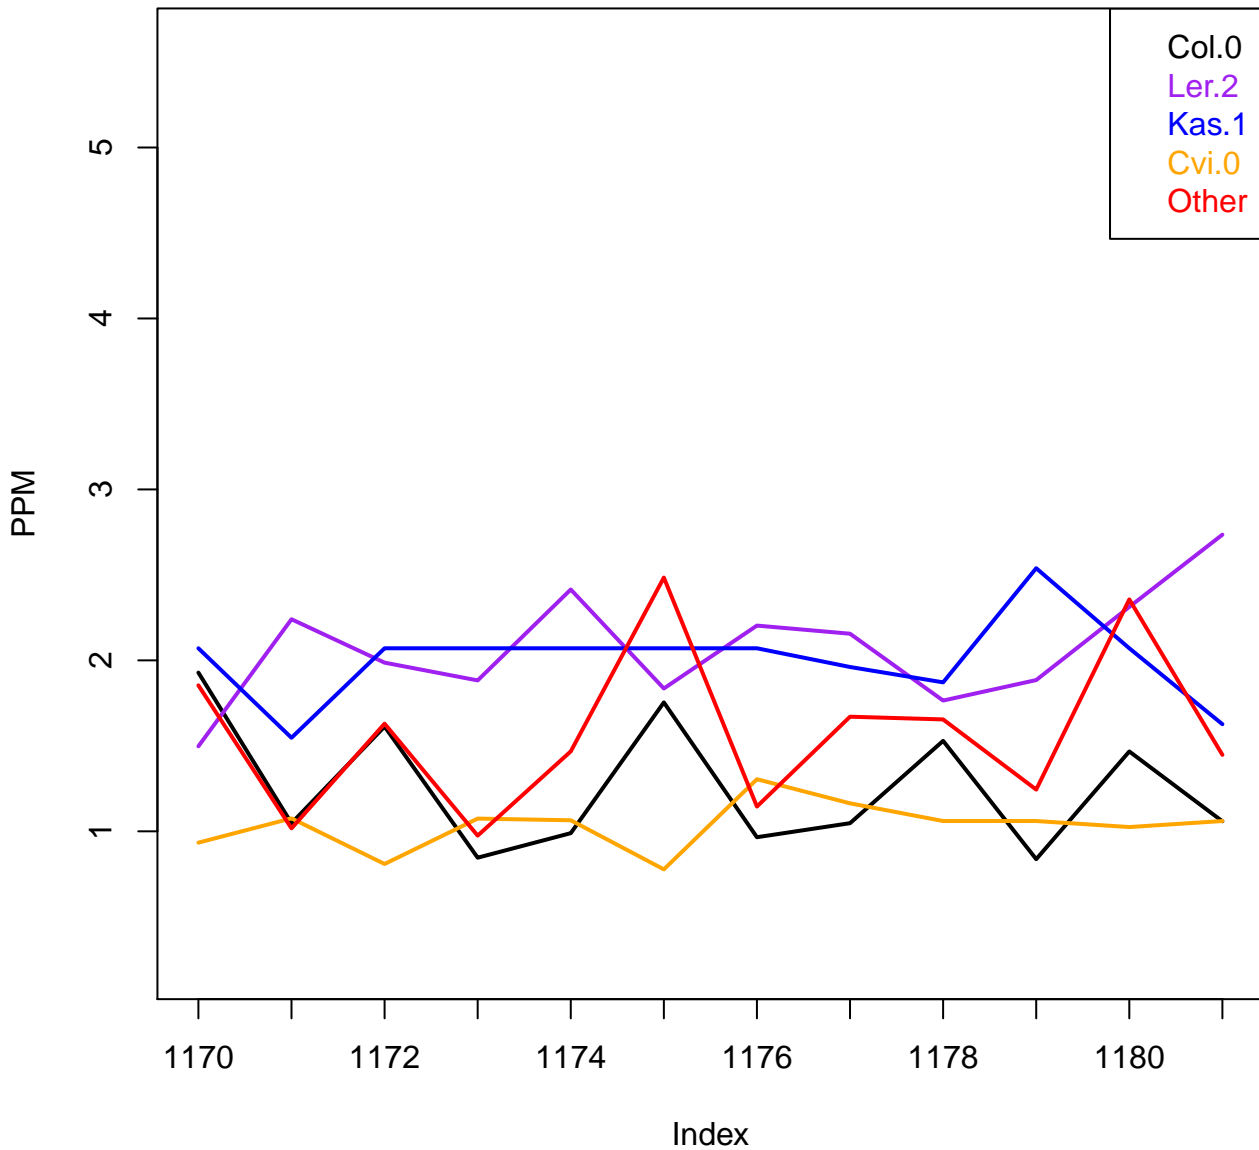

# Se82

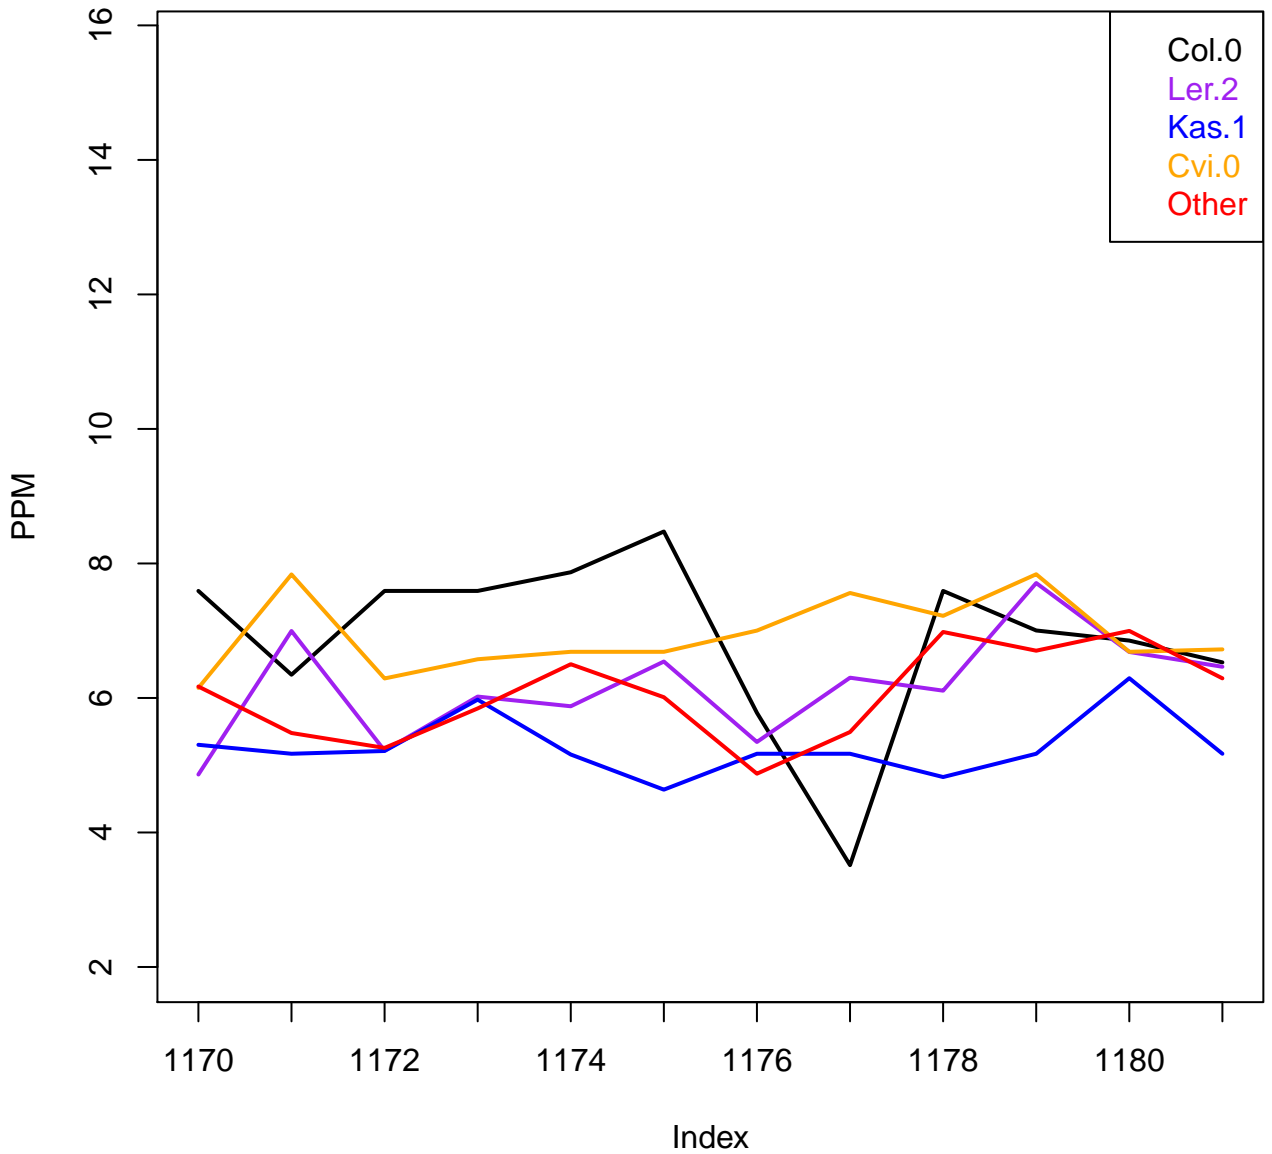



# Rb85

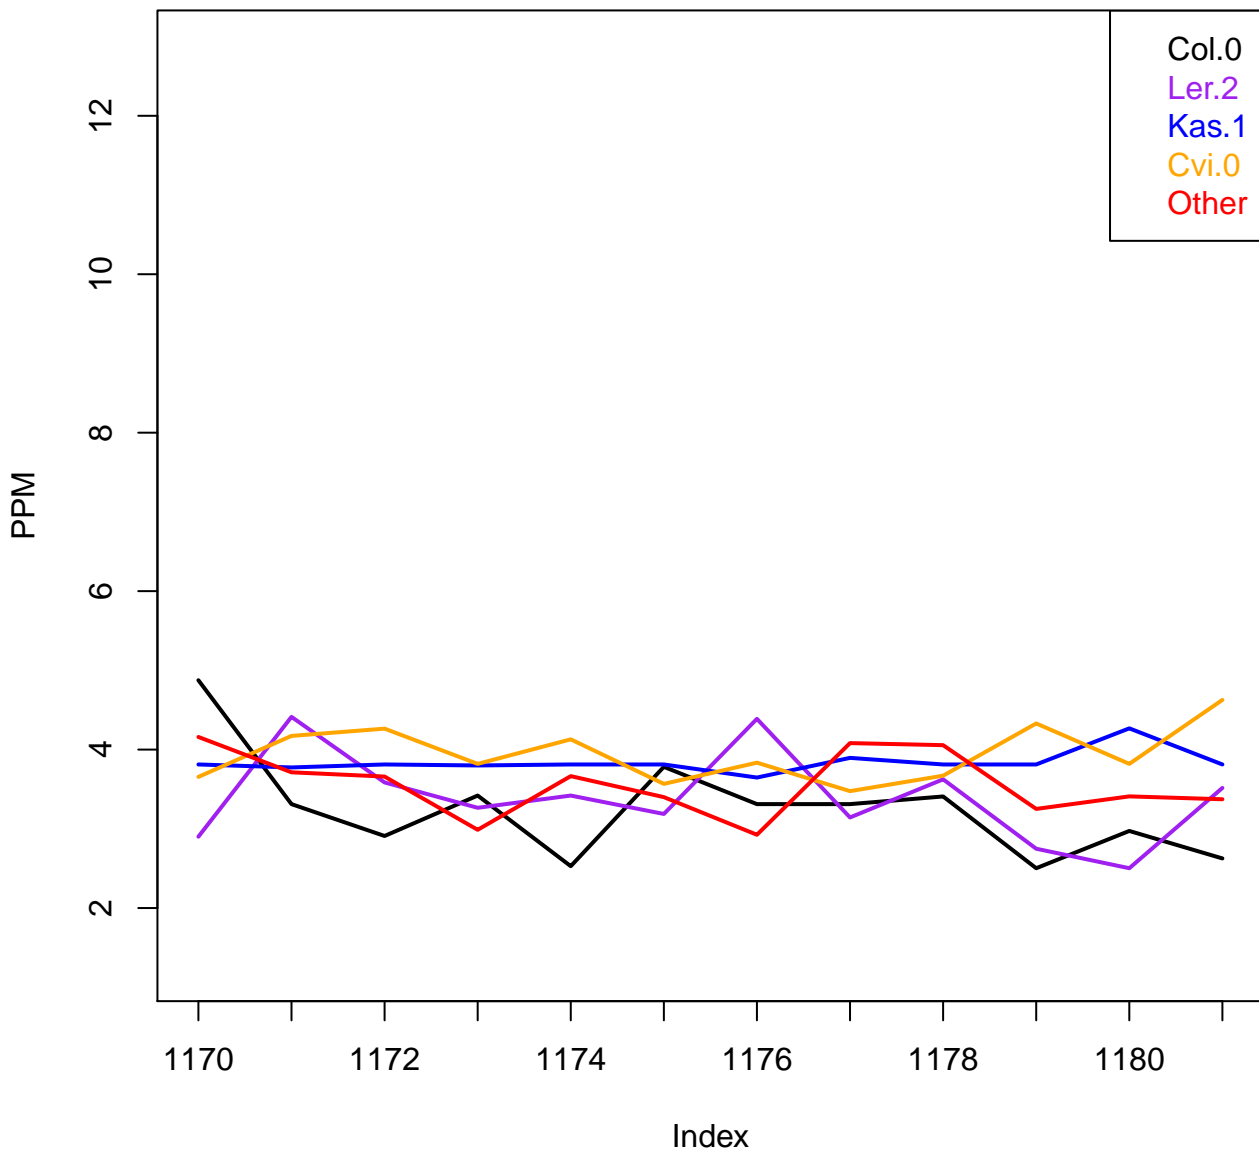

# Mo98

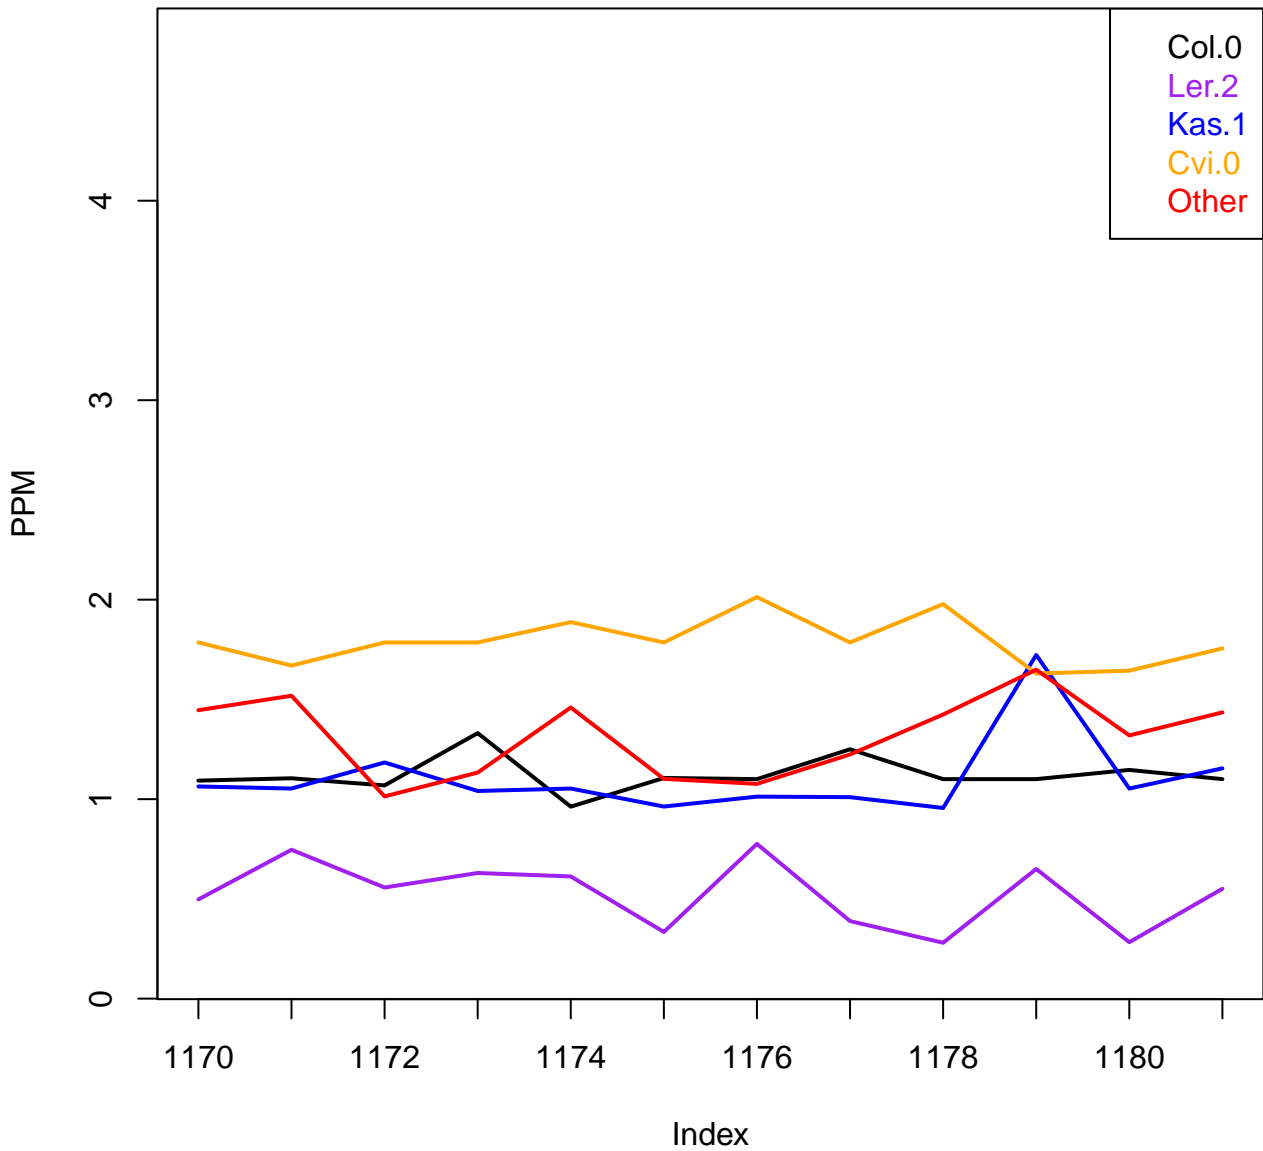

# Cd114

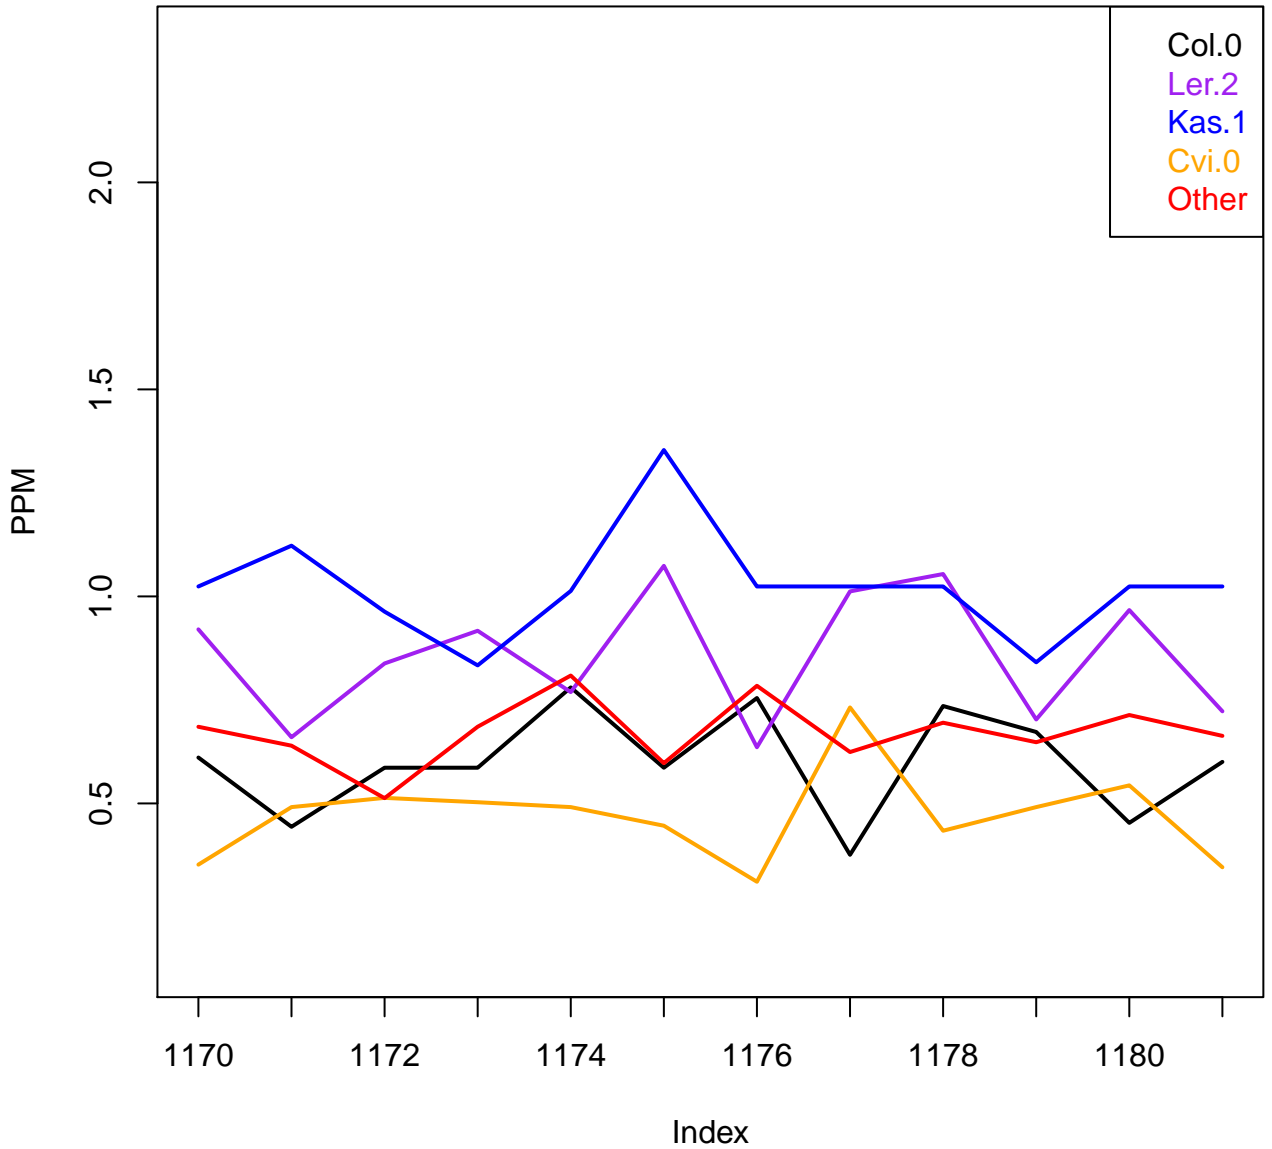

Supplement: pone.0035121.s009.pdf [file pone.0035121.s009.pdf]
